# Supplementary material for: Proteotranscriptomic Dissection of Breast Cancer T Cell States Identifies CD103+ Tfh-derived Cytotoxic Cells Linked to Immunotherapy Response
Source: Research Square preprint supplement (doi:10.21203/rs.3.rs-8394722/v1), 2026-01-07
Supplement: Supplementary file 2 [file 2ef8c3aa6403ffc222de50ad.xlsx]

## Sheet: Sheet1
gene	panel	base_annotation	custom_annotation	informative / good detection
TRBC1	custom		abTcell	N
TNFRSF9	custom		Active_Treg_Tex	Y
FCGR2A	custom		Anti_Fc	Y
ITGB2	custom		Atypical_B	Y
IL10	custom		B_cell_Ig_select	N
IL4	custom		B_cell_Ig_select	N
NR4A2	custom		B_cell_Tex	Y
BTLA	custom		B_Tfh_synapse_TLS	N
TNFRSF14	custom		B_Tfh_synapse_TLS	N
FCER2	custom		Bcell	Y
TNFRSF13C	custom		Bcell_Act	Y
IGHG1	custom		Bcell_Class	Y
IGHG2	custom		Bcell_Class	Y
IGHM	custom		Bcell_Class	Y
IGHA1	custom		Bcell_Class	Y
IGHA2	custom		Bcell_Class	N
IGHE	custom		Bcell_Class	N
CD24	custom		Cancer_Stem_cell	Y
PROM1	custom		Cancer_Stem_cell	Y
TBX21	custom		CD4 Th2	N
IL17A	custom		CD4Th17	N
IGFL2	custom		conTfh	N
NMB	custom		conTfh	N
IL21	custom		conTfh	N
IGF1R	custom		conTfh_IGFL2_Putative_receptor	Y
LAMP3	custom		DC	Y
IL23A	custom		DC_Act	N
IL33	custom		Eosinphils	Y
COL1A1	custom		Fibro	Y
MCAM	custom		Fibro	Y
CD34	custom		Fibro	Y
IL4R	custom		GC_Bcells	Y
TRGC1	custom		gdT	Y
TRGC2	custom		gdT	Y
TRDC	custom		gdT	Y
HSPA1A	custom		HeatShock_Tactivation	Y
NTAN1	custom		HEV	Y
CD63	custom		IgE_Baso_Bcell	Y
IFIT1	custom		Inteferon_Resp	Y
ISG20	custom		Inteferon_Resp	Y
TREM2	custom		Macro	N
CSF1R	custom		Macro	Y
APOE	custom		Macro	Y
FABP5	custom		Macro	Y
CXCL10	custom		Macro	Y
LYVE1	custom		Macro_Mesenchymal	Y
C5AR1	custom		Macrophage_Mono	Y
HLA-DQA1	custom		MCHII	Y
CD28	custom		Memory_B	Y
HLA-DRA	custom		MHCII	Y
FN1	custom		Mono	Y
IRF4	custom		Myeloid	Y
SELENOP	custom		Myeloid	Y
IL1B	custom		Myeloid	N
CD1C	custom		Myeloid	N
SIGLEC1	custom		Myeloid	Y
IL1A	custom		Myeloid_Pyro_Apop	N
GSDMD	custom		Myeloid_Pyro_Apop	N
XCL1	custom		Myeloid_T_MHC_Prime	Y
CCL4	custom		Myeloid_Tex	Y
IGHD	custom		Naïve_Aged_Atyp_Bcell	N
ITGA6	custom		Naïve_cmT	Y
KLF2	custom		Naïve_T	Y
FUT4	custom		Neutrophill_Epithelial_CD15	N
AREG	custom		NK	Y
FAS	custom		Pan_Apop_T	N
FASLG	custom		Pan_Apop_T	Y
TNF	custom		Pan_Inflam	N
IFNA1	custom		Pan_Inflam	N
IFNB1	custom		Pan_Inflam	N
TGFB1	custom		Pan_ligand	Y
CD38	custom		Plasmab	Y
SDC1	custom		PlasmaB	Y
DERL3	custom		PlasmaB_Sub	Y
PDPN	custom		Reticular_cells	Y
AICDA	custom		SHM	Y
ZFP36	custom		Tcell	Y
CSF1	custom		Terminal_Tex	Y
ENTPD1	custom		Tex	Y
TNFSF9	custom		Tex	N
TOX	custom		Tex	Y
NR4A1	custom		Tex_Bcell	Y
CXCL13	custom		Tex_Tfh_TLS	Y
ZNF683	custom		Tex_Trm	N
TOX2	custom		Tfh	Y
BCL6	custom		Tfh_dev	Y
ICOS	custom		Tfh_Treg	N
CD40LG	custom		THelper	N
CCL21	custom		TLS	Y
CXCR5	custom		TLS	Y
CR2	custom		TLS	Y
ACKR2	custom		TLS_Mesenchymal	Y
CCL19	custom		TLS_Myeloid	Y
LAIR1	custom		Tom	Y
CD44	custom		Tom	Y
DDR1	custom		Tom	Y
SPP1	custom		Tom	Y
LTBP1	custom		Tom	Y
LRRC32	custom		Tom	Y
ITGAE	custom		Trm	N
ADH1B	base	Adipocytes
ADIPOQ	base	Adipocytes
ANKRD29	base	Adipocytes
CAVIN2	base	Adipocytes
CLEC14A	base	Adipocytes
EGFL7	base	Adipocytes
HOXD8	base	Adipocytes
HOXD9	base	Adipocytes
KDR	base	Adipocytes
LPL	base	Adipocytes
MMRN2	base	Adipocytes
NDUFA4L2	base	Adipocytes
NOSTRIN	base	Adipocytes
PDCD1LG2	base	Adipocytes
PDE4A	base	Adipocytes
RAMP2	base	Adipocytes
RAPGEF3	base	Adipocytes
SOX18	base	Adipocytes
TFAP2A	base	Adipocytes
TIMP4	base	Adipocytes
UCP1	base	Adipocytes
ANKRD28	base	B cells
APOBEC3A	base	B cells
BANK1	base	B cells
C2orf42	base	B cells
CCPG1	base	B cells
CD19	base	B cells
CD27	base	B cells
CD79A	base	B cells
CD79B	base	B cells
CLECL1	base	B cells
DNAAF1	base	B cells
DUSP5	base	B cells
ERN1	base	B cells
FAM107B	base	B cells
ITM2C	base	B cells
LGALSL	base	B cells
MS4A1	base	B cells
MZB1	base	B cells
PELI1	base	B cells
RAB30	base	B cells
SEC11C	base	B cells
SLAMF1	base	B cells
SLAMF7	base	B cells
TCL1A	base	B cells
TRIB1	base	B cells
VOPP1	base	B cells
ABCC11	base	Breast cancer
APOBEC3B	base	Breast cancer
AR	base	Breast cancer
CAV1	base	Breast cancer
CCND1	base	Breast cancer
CDH1	base	Breast cancer
CEACAM6	base	Breast cancer
CENPF	base	Breast cancer
CXCL12	base	Breast cancer
EGFR	base	Breast cancer
ERBB2	base	Breast cancer
ESR1	base	Breast cancer
FOXA1	base	Breast cancer
GATA3	base	Breast cancer
KIT	base	Breast cancer
KRT7	base	Breast cancer
LDHB	base	Breast cancer
LRRC15	base	Breast cancer
MDM2	base	Breast cancer
MKI67	base	Breast cancer
PCLAF	base	Breast cancer
PGR	base	Breast cancer
PTGDS	base	Breast cancer
RUNX1	base	Breast cancer
S100A4	base	Breast cancer
SCD	base	Breast cancer
SFRP1	base	Breast cancer
SNAI1	base	Breast cancer
TACSTD2	base	Breast cancer
TCF4	base	Breast cancer
TOP2A	base	Breast cancer
ZEB1	base	Breast cancer
ZEB2	base	Breast cancer
ADAM9	base	Breast glandular cells
AGR3	base	Breast glandular cells
ALDH1A3	base	Breast glandular cells
AQP3	base	Breast glandular cells
BACE2	base	Breast glandular cells
C15orf48	base	Breast glandular cells
C5orf46	base	Breast glandular cells
CCDC6	base	Breast glandular cells
CD9	base	Breast glandular cells
CDC42EP1	base	Breast glandular cells
CLIC6	base	Breast glandular cells
CTTN	base	Breast glandular cells
DAPK3	base	Breast glandular cells
DMKN	base	Breast glandular cells
DNTTIP1	base	Breast glandular cells
DSC2	base	Breast glandular cells
EIF4EBP1	base	Breast glandular cells
ENAH	base	Breast glandular cells
FASN	base	Breast glandular cells
FLNB	base	Breast glandular cells
HMGA1	base	Breast glandular cells
HOOK2	base	Breast glandular cells
HPX	base	Breast glandular cells
JUP	base	Breast glandular cells
KRT23	base	Breast glandular cells
LYPD3	base	Breast glandular cells
MLPH	base	Breast glandular cells
MYO5B	base	Breast glandular cells
OCIAD2	base	Breast glandular cells
OPRPN	base	Breast glandular cells
PIGR	base	Breast glandular cells
PTRHD1	base	Breast glandular cells
QARS	base	Breast glandular cells
S100A14	base	Breast glandular cells
SCGB2A1	base	Breast glandular cells
SDC4	base	Breast glandular cells
SERHL2	base	Breast glandular cells
SERPINA3	base	Breast glandular cells
SH3YL1	base	Breast glandular cells
SLC25A37	base	Breast glandular cells
SLC5A6	base	Breast glandular cells
SMS	base	Breast glandular cells
SQLE	base	Breast glandular cells
SRPK1	base	Breast glandular cells
SVIL	base	Breast glandular cells
TCIM	base	Breast glandular cells
TMEM147	base	Breast glandular cells
TOMM7	base	Breast glandular cells
TPD52	base	Breast glandular cells
TRAPPC3	base	Breast glandular cells
USP53	base	Breast glandular cells
ZNF562	base	Breast glandular cells
ACTG2	base	Breast myoepithelial cells
C6orf132	base	Breast myoepithelial cells
DSP	base	Breast myoepithelial cells
DST	base	Breast myoepithelial cells
GLIPR1	base	Breast myoepithelial cells
KARS	base	Breast myoepithelial cells
KLF5	base	Breast myoepithelial cells
KRT5	base	Breast myoepithelial cells
KRT6B	base	Breast myoepithelial cells
MYLK	base	Breast myoepithelial cells
NARS	base	Breast myoepithelial cells
OXTR	base	Breast myoepithelial cells
PTN	base	Breast myoepithelial cells
TRAF4	base	Breast myoepithelial cells
TUBB2B	base	Breast myoepithelial cells
ADGRE5	base	Dendritic cells
CD83	base	Dendritic cells
CLEC9A	base	Dendritic cells
FCER1A	base	Dendritic cells
IL2RG	base	Dendritic cells
IL3RA	base	Dendritic cells
ITGAX	base	Dendritic cells
LILRA4	base	Dendritic cells
SPIB	base	Dendritic cells
AKR1C3	base	Endothelial cells
ANGPT2	base	Endothelial cells
AQP1	base	Endothelial cells
CD93	base	Endothelial cells
ESM1	base	Endothelial cells
PECAM1	base	Endothelial cells
SOX17	base	Endothelial cells
STC1	base	Endothelial cells
TIFA	base	Endothelial cells
VWF	base	Endothelial cells
WARS	base	Endothelial cells
ANKRD30A	base	Epithelial cells
EPCAM	base	Epithelial cells
KRT14	base	Epithelial cells
KRT8	base	Epithelial cells
MUC6	base	Epithelial cells
MYBPC1	base	Epithelial cells
CCDC80	base	Fibroblasts
DPT	base	Fibroblasts
FBLN1	base	Fibroblasts
IGF1	base	Fibroblasts
LUM	base	Fibroblasts
MMP1	base	Fibroblasts
MMP12	base	Fibroblasts
MMP2	base	Fibroblasts
PDGFRA	base	Fibroblasts
PIM1	base	Fibroblasts
POSTN	base	Fibroblasts
SFRP4	base	Fibroblasts
TAC1	base	Fibroblasts
TCEAL7	base	Fibroblasts
PTPRC	base	Immune cells
AIF1	base	Macrophages
APOC1	base	Macrophages
BASP1	base	Macrophages
C1QA	base	Macrophages
C1QC	base	Macrophages
CD163	base	Macrophages
CD68	base	Macrophages
CD80	base	Macrophages
CD86	base	Macrophages
CX3CR1	base	Macrophages
CXCL16	base	Macrophages
CXCL5	base	Macrophages
FAM49A	base	Macrophages
FGL2	base	Macrophages
GJB2	base	Macrophages
IGSF6	base	Macrophages
LPXN	base	Macrophages
LY86	base	Macrophages
LYZ	base	Macrophages
MAP3K8	base	Macrophages
MNDA	base	Macrophages
MRC1	base	Macrophages
PLD4	base	Macrophages
PPARG	base	Macrophages
SEC24A	base	Macrophages
SERPINB9	base	Macrophages
CPA3	base	Mast cells
CTSG	base	Mast cells
TPSAB1	base	Mast cells
CD14	base	Monocytes
FCGR3A	base	Monocytes
S100A8	base	Monocytes
ITGAM	base	Myeloid cells
CD247	base	NK cells
FCER1G	base	NK cells
GNLY	base	NK cells
KLRD1	base	NK cells
KLRF1	base	NK cells
NCAM1	base	NK cells
NKG7	base	NK cells
PRF1	base	NK cells
CEACAM8	base	Neutrophils
TNFRSF17	base	Plasma cells
ACTA2	base	Smooth muscle cells
AKR1C1	base	Smooth muscle cells
AVPR1A	base	Smooth muscle cells
CCL8	base	Smooth muscle cells
CRISPLD2	base	Smooth muscle cells
CTH	base	Smooth muscle cells
FOXC2	base	Smooth muscle cells
FSTL3	base	Smooth muscle cells
LARS	base	Smooth muscle cells
MYH11	base	Smooth muscle cells
PDGFRB	base	Smooth muscle cells
PDK4	base	Smooth muscle cells
SSTR2	base	Smooth muscle cells
THAP2	base	Smooth muscle cells
CCL5	base	T cells		Y
CCR7	base	T cells		Y
CD274	base	T cells		N
CD3E	base	T cells		Y
CD3G	base	T cells		Y
CD4	base	T cells		Y
CD69	base	T cells		Y
CD8A	base	T cells		Y
CTLA4	base	T cells		Y
CXCR4	base	T cells		Y
CYTIP	base	T cells		Y
DUSP2	base	T cells		N
FOXP3	base	T cells		Y
GPR183	base	T cells		Y
GZMA	base	T cells		Y
GZMK	base	T cells		N
HAVCR2	base	T cells		N
IL2RA	base	T cells		N
IL7R	base	T cells		Y
KLRB1	base	T cells		Y
KLRC1	base	T cells		Y
LAG3	base	T cells		N
LTB	base	T cells		Y
PDCD1	base	T cells		Y
PRDM1	base	T cells		Y
RHOH	base	T cells		Y
RORC	base	T cells		N
RTKN2	base	T cells		N
SELL	base	T cells		Y
SMAP2	base	T cells		Y
TCF7	base	T cells		Y
TENT5C	base	T cells		Y
TIGIT	base	T cells		Y
TRAC	base	T cells		Y
TUBA4A	base	T cells		N
