# Supplementary material for: Proteotranscriptomic Dissection of Breast Cancer T Cell States Identifies CD103+ Tfh-derived Cytotoxic Cells Linked to Immunotherapy Response
Source: Research Square preprint supplement (doi:10.21203/rs.3.rs-8394722/v1), 2026-01-07
Supplement: Supplementary file 4 [file 7acc26a8dbfc4ddee71a87a7.xlsx]

## Sheet: Sheet1
Antibody and label	Vendor	Product ID	Dilution factor
CD49F AF488	BioLegend	313608	50
BTLA PE	BioLegend	648303	50
CD45 PerCP	BioLegend	304026	100
HLA-DR PE Cy7	BioLegend	307615	30
CXCR5 AF647	BD Pharmingen	558113	40
CD8-APC Cy7	BioLegend	344714	100
CD16-APC Cy7	BioLegend	302018	100
CD19-APC Cy7	BD Pharmingen	561743	100
CD14-APC Cy7	BioLegend	367108	100
CXCR4 BV421	BioLegend	306517	30
CD40-L BV510	BioLegend	310829	10
PD-1 BV605	BioLegend	329924	30
CD127 BV711	BioLegend	351327	30
ICOS BV786	BD Biosciences	563877	50
CD103 BUV395	BD Biosciences	564346	80
CD4 BUV737	BD Biosciences	612748	100
7AAD	BioLegend	420404	20
Live Dead APC Cy7	Thermo Fisher Scientific	L34976	500
CD4 BV605	BioLegend	344646	100
PD1 BUV737	BD Biosciences	612792	30
