# Supplementary material for: Proteotranscriptomic Dissection of Breast Cancer T Cell States Identifies CD103+ Tfh-derived Cytotoxic Cells Linked to Immunotherapy Response
Source: Research Square preprint supplement (doi:10.21203/rs.3.rs-8394722/v1), 2026-01-07
Supplement: Supplementary file 5 [file c21fa9f44bc90730ba593d30.xlsx]

## Sheet: All_TIL_RNA_onlypos_markers
TPT1	5.98504e-106	0.555926	0.994	0.992	2.70458e-101	C01 - CD4+ Th : RPL7 ADT-CD49fmid	TPT1
RPL11	2.81933e-82	0.500513	0.994	0.982	1.27403e-77	C01 - CD4+ Th : RPL7 ADT-CD49fmid	RPL11
RPS18	2.84555e-79	0.522065	0.992	0.987	1.28587e-74	C01 - CD4+ Th : RPL7 ADT-CD49fmid	RPS18
RPS16	2.53396e-73	0.482675	0.981	0.972	1.14507e-68	C01 - CD4+ Th : RPL7 ADT-CD49fmid	RPS16
RPL34	4.46771e-73	0.466738	0.987	0.979	2.01891e-68	C01 - CD4+ Th : RPL7 ADT-CD49fmid	RPL34
RPS27A	4.25659e-72	0.443103	0.992	0.984	1.92351e-67	C01 - CD4+ Th : RPL7 ADT-CD49fmid	RPS27A
RPL13	1.0688e-71	0.451256	0.996	0.993	4.82981e-67	C01 - CD4+ Th : RPL7 ADT-CD49fmid	RPL13
RPL32	1.35498e-69	0.469449	0.992	0.982	6.12301e-65	C01 - CD4+ Th : RPL7 ADT-CD49fmid	RPL32
RPS12	9.62369e-67	0.460153	0.996	0.989	4.34885e-62	C01 - CD4+ Th : RPL7 ADT-CD49fmid	RPS12
RPL30	7.23378e-65	0.42702	0.995	0.984	3.26887e-60	C01 - CD4+ Th : RPL7 ADT-CD49fmid	RPL30
ANXA1	9.26918e-65	0.669815	0.877	0.648	4.18865e-60	C01 - CD4+ Th : RPL7 ADT-CD49fmid	ANXA1
RPS8	1.35719e-64	0.48872	0.989	0.971	6.13299e-60	C01 - CD4+ Th : RPL7 ADT-CD49fmid	RPS8
RPS6	1.38617e-64	0.497879	0.989	0.973	6.26398e-60	C01 - CD4+ Th : RPL7 ADT-CD49fmid	RPS6
RPS3A	8.14149e-64	0.470127	0.993	0.977	3.67906e-59	C01 - CD4+ Th : RPL7 ADT-CD49fmid	RPS3A
RPL19	6.19425e-60	0.407154	0.993	0.981	2.79912e-55	C01 - CD4+ Th : RPL7 ADT-CD49fmid	RPL19
RPL12	3.3972e-59	0.430781	0.991	0.97	1.53516e-54	C01 - CD4+ Th : RPL7 ADT-CD49fmid	RPL12
RPLP2	7.72813e-59	0.41788	0.988	0.976	3.49226e-54	C01 - CD4+ Th : RPL7 ADT-CD49fmid	RPLP2
CD40LG	4.22073e-58	0.963277	0.414	0.165	1.9073e-53	C01 - CD4+ Th : RPL7 ADT-CD49fmid	CD40LG
RPLP1	1.35582e-57	0.404865	0.996	0.992	6.12681e-53	C01 - CD4+ Th : RPL7 ADT-CD49fmid	RPLP1
RPS4X	1.80246e-57	0.421089	0.987	0.978	8.14513e-53	C01 - CD4+ Th : RPL7 ADT-CD49fmid	RPS4X
RPL18A	3.85883e-57	0.418188	0.988	0.978	1.74377e-52	C01 - CD4+ Th : RPL7 ADT-CD49fmid	RPL18A
RPS23	3.50809e-56	0.388754	0.989	0.98	1.58527e-51	C01 - CD4+ Th : RPL7 ADT-CD49fmid	RPS23
RPL9	1.14311e-54	0.424535	0.989	0.973	5.16561e-50	C01 - CD4+ Th : RPL7 ADT-CD49fmid	RPL9
RPS13	2.19381e-53	0.429676	0.987	0.957	9.91361e-49	C01 - CD4+ Th : RPL7 ADT-CD49fmid	RPS13
RPL39	5.79527e-53	0.388631	0.993	0.977	2.61883e-48	C01 - CD4+ Th : RPL7 ADT-CD49fmid	RPL39
IL7R	7.69198e-52	0.645245	0.879	0.66	3.47593e-47	C01 - CD4+ Th : RPL7 ADT-CD49fmid	IL7R
RPS14	8.4819e-51	0.382001	0.991	0.977	3.83289e-46	C01 - CD4+ Th : RPL7 ADT-CD49fmid	RPS14
RPL3	2.30635e-50	0.395412	0.987	0.975	1.04222e-45	C01 - CD4+ Th : RPL7 ADT-CD49fmid	RPL3
RPL7	8.21707e-50	0.51875	0.95	0.878	3.71321e-45	C01 - CD4+ Th : RPL7 ADT-CD49fmid	RPL7
RPL18	2.35767e-48	0.374019	0.992	0.967	1.06541e-43	C01 - CD4+ Th : RPL7 ADT-CD49fmid	RPL18
RPL10	4.88607e-48	0.368812	0.994	0.989	2.20797e-43	C01 - CD4+ Th : RPL7 ADT-CD49fmid	RPL10
FTH1	7.02724e-48	0.58827	0.991	0.969	3.17554e-43	C01 - CD4+ Th : RPL7 ADT-CD49fmid	FTH1
RPL13A	1.30715e-47	0.429005	0.982	0.968	5.90689e-43	C01 - CD4+ Th : RPL7 ADT-CD49fmid	RPL13A
RPS2	1.334e-47	0.357353	0.989	0.987	6.02823e-43	C01 - CD4+ Th : RPL7 ADT-CD49fmid	RPS2
RPL22	1.7621e-47	0.450544	0.96	0.923	7.96277e-43	C01 - CD4+ Th : RPL7 ADT-CD49fmid	RPL22
EEF1A1	9.75704e-47	0.436136	0.999	0.991	4.40911e-42	C01 - CD4+ Th : RPL7 ADT-CD49fmid	EEF1A1
RPL14	3.57977e-46	0.351076	0.982	0.968	1.61766e-41	C01 - CD4+ Th : RPL7 ADT-CD49fmid	RPL14
RPS7	4.9179e-46	0.343409	0.986	0.971	2.22235e-41	C01 - CD4+ Th : RPL7 ADT-CD49fmid	RPS7
RPL36	1.09139e-44	0.374802	0.958	0.951	4.93189e-40	C01 - CD4+ Th : RPL7 ADT-CD49fmid	RPL36
RPL29	2.06459e-44	0.382501	0.979	0.964	9.32966e-40	C01 - CD4+ Th : RPL7 ADT-CD49fmid	RPL29
RPS25	9.46598e-44	0.336975	0.986	0.974	4.27758e-39	C01 - CD4+ Th : RPL7 ADT-CD49fmid	RPS25
CD52	1.91074e-43	0.520154	0.936	0.849	8.63446e-39	C01 - CD4+ Th : RPL7 ADT-CD49fmid	CD52
RPL4	2.65675e-43	0.452493	0.938	0.883	1.20056e-38	C01 - CD4+ Th : RPL7 ADT-CD49fmid	RPL4
RPS20	4.07745e-43	0.48934	0.95	0.88	1.84256e-38	C01 - CD4+ Th : RPL7 ADT-CD49fmid	RPS20
RPL21	1.67114e-42	0.386506	0.983	0.968	7.55173e-38	C01 - CD4+ Th : RPL7 ADT-CD49fmid	RPL21
RPL23	2.25112e-41	0.444405	0.896	0.86	1.01726e-36	C01 - CD4+ Th : RPL7 ADT-CD49fmid	RPL23
RPL26	3.24147e-41	0.335671	0.987	0.974	1.46479e-36	C01 - CD4+ Th : RPL7 ADT-CD49fmid	RPL26
RPL35A	2.39116e-40	0.33423	0.981	0.966	1.08054e-35	C01 - CD4+ Th : RPL7 ADT-CD49fmid	RPL35A
RPL38	2.49708e-38	0.388593	0.949	0.932	1.12841e-33	C01 - CD4+ Th : RPL7 ADT-CD49fmid	RPL38
RPS19	5.68595e-38	0.312973	0.989	0.986	2.56943e-33	C01 - CD4+ Th : RPL7 ADT-CD49fmid	RPS19
RPS29	7.42433e-38	0.325093	0.975	0.971	3.35498e-33	C01 - CD4+ Th : RPL7 ADT-CD49fmid	RPS29
RPL37	1.12311e-37	0.324201	0.979	0.973	5.07523e-33	C01 - CD4+ Th : RPL7 ADT-CD49fmid	RPL37
RPS15A	2.52941e-37	0.28542	0.989	0.981	1.14302e-32	C01 - CD4+ Th : RPL7 ADT-CD49fmid	RPS15A
RPL27	5.97929e-37	0.362353	0.968	0.93	2.70198e-32	C01 - CD4+ Th : RPL7 ADT-CD49fmid	RPL27
RPL5	6.0748e-37	0.394382	0.973	0.942	2.74514e-32	C01 - CD4+ Th : RPL7 ADT-CD49fmid	RPL5
NACA	9.13829e-37	0.352866	0.966	0.94	4.1295e-32	C01 - CD4+ Th : RPL7 ADT-CD49fmid	NACA
RPL35	3.81067e-36	0.331144	0.967	0.956	1.72201e-31	C01 - CD4+ Th : RPL7 ADT-CD49fmid	RPL35
RPS15	6.25245e-36	0.291814	0.985	0.978	2.82542e-31	C01 - CD4+ Th : RPL7 ADT-CD49fmid	RPS15
RPL6	1.2635e-35	0.343368	0.981	0.964	5.70963e-31	C01 - CD4+ Th : RPL7 ADT-CD49fmid	RPL6
RPL23A	1.88521e-35	0.303295	0.985	0.975	8.51908e-31	C01 - CD4+ Th : RPL7 ADT-CD49fmid	RPL23A
RPS11	3.44472e-35	0.373887	0.967	0.944	1.55664e-30	C01 - CD4+ Th : RPL7 ADT-CD49fmid	RPS11
UBA52	5.20794e-35	0.347224	0.97	0.946	2.35342e-30	C01 - CD4+ Th : RPL7 ADT-CD49fmid	UBA52
RPL27A	9.23321e-35	0.357896	0.979	0.955	4.1724e-30	C01 - CD4+ Th : RPL7 ADT-CD49fmid	RPL27A
RACK1	1.19099e-33	0.699348	0.555	0.399	5.38196e-29	C01 - CD4+ Th : RPL7 ADT-CD49fmid	RACK1
RPS5	4.21352e-33	0.32233	0.953	0.939	1.90405e-28	C01 - CD4+ Th : RPL7 ADT-CD49fmid	RPS5
GPR183	5.42972e-33	0.57972	0.584	0.366	2.45364e-28	C01 - CD4+ Th : RPL7 ADT-CD49fmid	GPR183
S100A10	7.71701e-33	0.488653	0.871	0.766	3.48724e-28	C01 - CD4+ Th : RPL7 ADT-CD49fmid	S100A10
RPL24	1.09383e-32	0.297047	0.981	0.962	4.94291e-28	C01 - CD4+ Th : RPL7 ADT-CD49fmid	RPL24
RPL10A	1.14147e-31	0.327158	0.979	0.952	5.15817e-27	C01 - CD4+ Th : RPL7 ADT-CD49fmid	RPL10A
RPLP0	1.3056e-31	0.393887	0.944	0.895	5.89987e-27	C01 - CD4+ Th : RPL7 ADT-CD49fmid	RPLP0
RPS3	2.42157e-31	0.297341	0.989	0.976	1.09428e-26	C01 - CD4+ Th : RPL7 ADT-CD49fmid	RPS3
LTB	2.66658e-31	0.426679	0.824	0.642	1.205e-26	C01 - CD4+ Th : RPL7 ADT-CD49fmid	LTB
RPS21	7.09596e-31	0.321299	0.979	0.955	3.20659e-26	C01 - CD4+ Th : RPL7 ADT-CD49fmid	RPS21
RPL37A	2.21014e-30	0.311755	0.973	0.959	9.98741e-26	C01 - CD4+ Th : RPL7 ADT-CD49fmid	RPL37A
RPS27	8.9764e-30	0.27454	0.993	0.991	4.05635e-25	C01 - CD4+ Th : RPL7 ADT-CD49fmid	RPS27
LDHB	1.53883e-29	0.494169	0.738	0.584	6.95383e-25	C01 - CD4+ Th : RPL7 ADT-CD49fmid	LDHB
EEF1B2	6.73592e-29	0.392273	0.925	0.89	3.0439e-24	C01 - CD4+ Th : RPL7 ADT-CD49fmid	EEF1B2
RPL41	2.58818e-28	0.285227	0.991	0.989	1.16957e-23	C01 - CD4+ Th : RPL7 ADT-CD49fmid	RPL41
NOP53	2.94687e-28	0.588057	0.497	0.318	1.33166e-23	C01 - CD4+ Th : RPL7 ADT-CD49fmid	NOP53
RPS9	6.76881e-28	0.286241	0.974	0.968	3.05876e-23	C01 - CD4+ Th : RPL7 ADT-CD49fmid	RPS9
SARAF	7.49022e-28	0.389004	0.942	0.867	3.38476e-23	C01 - CD4+ Th : RPL7 ADT-CD49fmid	SARAF
RPS28	1.21581e-27	0.259528	0.98	0.975	5.4941e-23	C01 - CD4+ Th : RPL7 ADT-CD49fmid	RPS28
RPSA	6.9494e-27	0.338793	0.974	0.949	3.14037e-22	C01 - CD4+ Th : RPL7 ADT-CD49fmid	RPSA
PTGER4	2.57584e-26	0.430036	0.605	0.409	1.16399e-21	C01 - CD4+ Th : RPL7 ADT-CD49fmid	PTGER4
PFDN5	2.06503e-25	0.304016	0.931	0.894	9.33165e-21	C01 - CD4+ Th : RPL7 ADT-CD49fmid	PFDN5
TMSB4X	4.79537e-25	0.271477	0.999	0.994	2.16698e-20	C01 - CD4+ Th : RPL7 ADT-CD49fmid	TMSB4X
RPL8	5.1327e-25	0.260268	0.975	0.964	2.31941e-20	C01 - CD4+ Th : RPL7 ADT-CD49fmid	RPL8
RPL7A	8.23789e-25	0.252883	0.985	0.972	3.72262e-20	C01 - CD4+ Th : RPL7 ADT-CD49fmid	RPL7A
RNASET2	2.13936e-24	0.437194	0.526	0.356	9.66756e-20	C01 - CD4+ Th : RPL7 ADT-CD49fmid	RNASET2
RPL31	9.3521e-23	0.351007	0.877	0.787	4.22612e-18	C01 - CD4+ Th : RPL7 ADT-CD49fmid	RPL31
AC016831.5	2.4605e-22	0.33883	0.348	0.194	1.11187e-17	C01 - CD4+ Th : RPL7 ADT-CD49fmid	AC016831.5
ARL4C	4.25477e-22	0.439172	0.758	0.615	1.92269e-17	C01 - CD4+ Th : RPL7 ADT-CD49fmid	ARL4C
FXYD5	1.07931e-21	0.341566	0.814	0.683	4.8773e-17	C01 - CD4+ Th : RPL7 ADT-CD49fmid	FXYD5
ATP5MC2	1.48438e-21	0.309908	0.498	0.333	6.70778e-17	C01 - CD4+ Th : RPL7 ADT-CD49fmid	ATP5MC2
CCR6	2.22994e-21	0.534776	0.234	0.11	1.00769e-16	C01 - CD4+ Th : RPL7 ADT-CD49fmid	CCR6
ATP5F1E	1.60549e-20	0.319007	0.558	0.39	7.25506e-16	C01 - CD4+ Th : RPL7 ADT-CD49fmid	ATP5F1E
S100A4	4.5047e-20	0.352203	0.93	0.862	2.03563e-15	C01 - CD4+ Th : RPL7 ADT-CD49fmid	S100A4
CCR7	4.86692e-20	0.46442	0.41	0.252	2.19931e-15	C01 - CD4+ Th : RPL7 ADT-CD49fmid	CCR7
CD6	8.43969e-20	0.379172	0.526	0.361	3.81381e-15	C01 - CD4+ Th : RPL7 ADT-CD49fmid	CD6
ATP5MG	1.8544e-19	0.290585	0.51	0.354	8.37983e-15	C01 - CD4+ Th : RPL7 ADT-CD49fmid	ATP5MG
TIMP1	6.13768e-19	0.36977	0.389	0.239	2.77356e-14	C01 - CD4+ Th : RPL7 ADT-CD49fmid	TIMP1
PABPC1	6.4192e-19	0.328473	0.896	0.835	2.90077e-14	C01 - CD4+ Th : RPL7 ADT-CD49fmid	PABPC1
CTSH	2.88307e-18	0.358551	0.159	0.067	1.30283e-13	C01 - CD4+ Th : RPL7 ADT-CD49fmid	CTSH
TOMM7	7.88003e-18	0.268259	0.899	0.853	3.56091e-13	C01 - CD4+ Th : RPL7 ADT-CD49fmid	TOMM7
SELENOK	9.89224e-18	0.445632	0.472	0.317	4.4702e-13	C01 - CD4+ Th : RPL7 ADT-CD49fmid	SELENOK
TRAT1	1.165e-17	0.323093	0.414	0.265	5.26452e-13	C01 - CD4+ Th : RPL7 ADT-CD49fmid	TRAT1
TNFAIP3	1.74093e-17	0.334062	0.917	0.849	7.86709e-13	C01 - CD4+ Th : RPL7 ADT-CD49fmid	TNFAIP3
MGAT4A	2.35298e-17	0.314143	0.364	0.224	1.06329e-12	C01 - CD4+ Th : RPL7 ADT-CD49fmid	MGAT4A
PPP1CB	2.73877e-17	0.381292	0.637	0.505	1.23762e-12	C01 - CD4+ Th : RPL7 ADT-CD49fmid	PPP1CB
AC058791.1	4.68161e-17	0.392279	0.556	0.41	2.11557e-12	C01 - CD4+ Th : RPL7 ADT-CD49fmid	AC058791.1
ANKRD28	5.21976e-17	0.425958	0.407	0.262	2.35876e-12	C01 - CD4+ Th : RPL7 ADT-CD49fmid	ANKRD28
AQP3	6.37604e-17	0.429135	0.358	0.228	2.88127e-12	C01 - CD4+ Th : RPL7 ADT-CD49fmid	AQP3
PASK	2.1046e-16	0.337925	0.2	0.097	9.5105e-12	C01 - CD4+ Th : RPL7 ADT-CD49fmid	PASK
FYB1	5.6218e-16	0.338	0.435	0.29	2.54044e-11	C01 - CD4+ Th : RPL7 ADT-CD49fmid	FYB1
EIF3E	6.80354e-16	0.34723	0.749	0.639	3.07445e-11	C01 - CD4+ Th : RPL7 ADT-CD49fmid	EIF3E
LEPROTL1	7.09269e-16	0.316032	0.739	0.609	3.20512e-11	C01 - CD4+ Th : RPL7 ADT-CD49fmid	LEPROTL1
SLC2A3	1.05828e-15	0.329984	0.724	0.596	4.78227e-11	C01 - CD4+ Th : RPL7 ADT-CD49fmid	SLC2A3
RORA	1.69556e-15	0.318855	0.655	0.508	7.66209e-11	C01 - CD4+ Th : RPL7 ADT-CD49fmid	RORA
RPL36AL	1.99179e-15	0.259484	0.91	0.865	9.00072e-11	C01 - CD4+ Th : RPL7 ADT-CD49fmid	RPL36AL
CTSL	3.12989e-15	0.333111	0.172	0.079	1.41436e-10	C01 - CD4+ Th : RPL7 ADT-CD49fmid	CTSL
S100A11	5.98797e-15	0.371241	0.775	0.684	2.7059e-10	C01 - CD4+ Th : RPL7 ADT-CD49fmid	S100A11
CD48	9.15892e-15	0.300145	0.817	0.72	4.13882e-10	C01 - CD4+ Th : RPL7 ADT-CD49fmid	CD48
LMNA	1.70442e-14	0.365139	0.732	0.627	7.70208e-10	C01 - CD4+ Th : RPL7 ADT-CD49fmid	LMNA
FLT3LG	2.13853e-14	0.304183	0.272	0.16	9.66379e-10	C01 - CD4+ Th : RPL7 ADT-CD49fmid	FLT3LG
AP3M2	2.52113e-14	0.331239	0.318	0.196	1.13927e-09	C01 - CD4+ Th : RPL7 ADT-CD49fmid	AP3M2
NSD3	8.42212e-14	0.289717	0.351	0.228	3.80587e-09	C01 - CD4+ Th : RPL7 ADT-CD49fmid	NSD3
BICDL1	1.0551e-13	0.327629	0.302	0.185	4.76789e-09	C01 - CD4+ Th : RPL7 ADT-CD49fmid	BICDL1
SMDT1	1.19903e-13	0.335529	0.527	0.418	5.41831e-09	C01 - CD4+ Th : RPL7 ADT-CD49fmid	SMDT1
FAM107B	2.53817e-13	0.374166	0.712	0.61	1.14697e-08	C01 - CD4+ Th : RPL7 ADT-CD49fmid	FAM107B
SH3BGRL3	7.5483e-13	0.267067	0.94	0.901	3.411e-08	C01 - CD4+ Th : RPL7 ADT-CD49fmid	SH3BGRL3
CD5	1.62913e-12	0.32496	0.305	0.199	7.36189e-08	C01 - CD4+ Th : RPL7 ADT-CD49fmid	CD5
ALOX5AP	5.7793e-12	0.270094	0.56	0.429	2.61161e-07	C01 - CD4+ Th : RPL7 ADT-CD49fmid	ALOX5AP
ABRACL	6.71421e-12	0.315895	0.591	0.467	3.03408e-07	C01 - CD4+ Th : RPL7 ADT-CD49fmid	ABRACL
EEF2	8.47562e-12	0.262917	0.828	0.772	3.83005e-07	C01 - CD4+ Th : RPL7 ADT-CD49fmid	EEF2
GLIPR1	1.24879e-11	0.362079	0.464	0.353	5.64317e-07	C01 - CD4+ Th : RPL7 ADT-CD49fmid	GLIPR1
ITM2B	1.5904e-11	0.270481	0.906	0.853	7.18687e-07	C01 - CD4+ Th : RPL7 ADT-CD49fmid	ITM2B
TENT5C	3.1464e-11	0.308517	0.321	0.211	1.42183e-06	C01 - CD4+ Th : RPL7 ADT-CD49fmid	TENT5C
TNFRSF25	3.7032e-11	0.294533	0.38	0.265	1.67344e-06	C01 - CD4+ Th : RPL7 ADT-CD49fmid	TNFRSF25
KLRB1	8.4627e-11	0.486005	0.381	0.268	3.82421e-06	C01 - CD4+ Th : RPL7 ADT-CD49fmid	KLRB1
C1orf162	1.14526e-10	0.308086	0.227	0.138	5.17534e-06	C01 - CD4+ Th : RPL7 ADT-CD49fmid	C1orf162
RPL36A	1.50907e-10	0.263845	0.751	0.657	6.81932e-06	C01 - CD4+ Th : RPL7 ADT-CD49fmid	RPL36A
FKBP11	1.79859e-10	0.252835	0.291	0.189	8.12764e-06	C01 - CD4+ Th : RPL7 ADT-CD49fmid	FKBP11
CDKN1A	2.50869e-10	0.295819	0.416	0.307	1.13365e-05	C01 - CD4+ Th : RPL7 ADT-CD49fmid	CDKN1A
FOXP1	7.88969e-10	0.297599	0.486	0.373	3.56527e-05	C01 - CD4+ Th : RPL7 ADT-CD49fmid	FOXP1
ATP2B1	9.858e-10	0.258933	0.473	0.36	4.45473e-05	C01 - CD4+ Th : RPL7 ADT-CD49fmid	ATP2B1
RCAN3	5.60778e-09	0.273055	0.447	0.341	0.00025341	C01 - CD4+ Th : RPL7 ADT-CD49fmid	RCAN3
KDSR	7.59638e-09	0.268357	0.274	0.191	0.000343273	C01 - CD4+ Th : RPL7 ADT-CD49fmid	KDSR
CCL20	9.22635e-09	0.36193	0.13	0.067	0.000416929	C01 - CD4+ Th : RPL7 ADT-CD49fmid	CCL20
CMPK1	1.05658e-08	0.284785	0.419	0.321	0.000477457	C01 - CD4+ Th : RPL7 ADT-CD49fmid	CMPK1
TRBC2	1.36422e-08	0.281555	0.795	0.729	0.000616476	C01 - CD4+ Th : RPL7 ADT-CD49fmid	TRBC2
RILPL2	1.85708e-07	0.272827	0.445	0.368	0.00839194	C01 - CD4+ Th : RPL7 ADT-CD49fmid	RILPL2
CAPG	3.28979e-07	0.278067	0.312	0.236	0.0148662	C01 - CD4+ Th : RPL7 ADT-CD49fmid	CAPG
YIPF5	3.77352e-07	0.256977	0.302	0.224	0.0170522	C01 - CD4+ Th : RPL7 ADT-CD49fmid	YIPF5
PLIN2	4.79739e-05	0.299628	0.361	0.301	1	C01 - CD4+ Th : RPL7 ADT-CD49fmid	PLIN2
GPR1831	1.95222e-170	1.56362	0.789	0.344	8.82188e-166	C02 - CD4+ Th : GPR183 ADT-CD49fhi	GPR183
ANXA11	1.12289e-141	1.32896	0.939	0.642	5.07422e-137	C02 - CD4+ Th : GPR183 ADT-CD49fhi	ANXA1
IL7R1	1.50337e-112	0.846879	0.952	0.653	6.79358e-108	C02 - CD4+ Th : GPR183 ADT-CD49fhi	IL7R
CCR71	8.4765e-112	1.39921	0.598	0.231	3.83045e-107	C02 - CD4+ Th : GPR183 ADT-CD49fhi	CCR7
LMNA1	1.26329e-102	1.23889	0.876	0.611	5.70868e-98	C02 - CD4+ Th : GPR183 ADT-CD49fhi	LMNA
FTH11	1.7911e-101	0.980156	0.997	0.968	8.09382e-97	C02 - CD4+ Th : GPR183 ADT-CD49fhi	FTH1
TPT11	3.91401e-96	0.535629	0.999	0.991	1.7687e-91	C02 - CD4+ Th : GPR183 ADT-CD49fhi	TPT1
ZNF165	8.94737e-88	0.807603	0.352	0.079	4.04323e-83	C02 - CD4+ Th : GPR183 ADT-CD49fhi	ZNF165
RPL33	1.10102e-77	0.512996	0.994	0.974	4.9754e-73	C02 - CD4+ Th : GPR183 ADT-CD49fhi	RPL3
PABPC11	4.64656e-75	0.647812	0.957	0.829	2.09973e-70	C02 - CD4+ Th : GPR183 ADT-CD49fhi	PABPC1
RPL321	8.37433e-69	0.487434	0.996	0.981	3.78428e-64	C02 - CD4+ Th : GPR183 ADT-CD49fhi	RPL32
RPS121	1.3301e-65	0.455473	0.995	0.99	6.01059e-61	C02 - CD4+ Th : GPR183 ADT-CD49fhi	RPS12
EZR	1.78025e-62	0.743116	0.879	0.723	8.04476e-58	C02 - CD4+ Th : GPR183 ADT-CD49fhi	EZR
RGCC	2.4939e-62	0.669141	0.952	0.793	1.12697e-57	C02 - CD4+ Th : GPR183 ADT-CD49fhi	RGCC
RPL301	6.09373e-62	0.427045	0.999	0.984	2.75369e-57	C02 - CD4+ Th : GPR183 ADT-CD49fhi	RPL30
EEF1A11	5.38823e-61	0.435572	0.997	0.991	2.43489e-56	C02 - CD4+ Th : GPR183 ADT-CD49fhi	EEF1A1
GRASP	2.38359e-60	0.643155	0.359	0.115	1.07712e-55	C02 - CD4+ Th : GPR183 ADT-CD49fhi	GRASP
YPEL5	3.39936e-59	0.605035	0.927	0.741	1.53614e-54	C02 - CD4+ Th : GPR183 ADT-CD49fhi	YPEL5
RPS161	4.39708e-57	0.423786	0.992	0.971	1.987e-52	C02 - CD4+ Th : GPR183 ADT-CD49fhi	RPS16
RPS231	1.99742e-56	0.399157	0.995	0.98	9.02612e-52	C02 - CD4+ Th : GPR183 ADT-CD49fhi	RPS23
RPS131	2.0003e-56	0.466613	0.991	0.957	9.03916e-52	C02 - CD4+ Th : GPR183 ADT-CD49fhi	RPS13
RPS4X1	2.76308e-55	0.411464	0.996	0.977	1.24861e-50	C02 - CD4+ Th : GPR183 ADT-CD49fhi	RPS4X
RPL91	2.9888e-55	0.424583	0.994	0.973	1.35061e-50	C02 - CD4+ Th : GPR183 ADT-CD49fhi	RPL9
CDKN1A1	4.12111e-55	0.69923	0.561	0.291	1.86229e-50	C02 - CD4+ Th : GPR183 ADT-CD49fhi	CDKN1A
RPS3A1	6.03095e-55	0.442935	0.996	0.976	2.72533e-50	C02 - CD4+ Th : GPR183 ADT-CD49fhi	RPS3A
CD55	7.73753e-55	0.703299	0.65	0.365	3.49651e-50	C02 - CD4+ Th : GPR183 ADT-CD49fhi	CD55
RPS61	9.12964e-55	0.440883	0.996	0.972	4.12559e-50	C02 - CD4+ Th : GPR183 ADT-CD49fhi	RPS6
RPS27A1	2.69966e-53	0.38981	0.996	0.984	1.21995e-48	C02 - CD4+ Th : GPR183 ADT-CD49fhi	RPS27A
RPL341	4.62945e-53	0.409837	0.994	0.978	2.092e-48	C02 - CD4+ Th : GPR183 ADT-CD49fhi	RPL34
ZFP36	4.94791e-53	0.559267	0.957	0.829	2.23591e-48	C02 - CD4+ Th : GPR183 ADT-CD49fhi	ZFP36
RPS81	3.51956e-52	0.450361	0.992	0.971	1.59045e-47	C02 - CD4+ Th : GPR183 ADT-CD49fhi	RPS8
EIF1	5.24165e-52	0.355055	0.997	0.986	2.36865e-47	C02 - CD4+ Th : GPR183 ADT-CD49fhi	EIF1
RPS141	1.0288e-50	0.388337	0.992	0.977	4.64906e-46	C02 - CD4+ Th : GPR183 ADT-CD49fhi	RPS14
RPS31	1.90175e-50	0.384366	0.996	0.976	8.59383e-46	C02 - CD4+ Th : GPR183 ADT-CD49fhi	RPS3
JUND	2.51014e-50	0.441427	0.985	0.935	1.13431e-45	C02 - CD4+ Th : GPR183 ADT-CD49fhi	JUND
KLF2	7.47755e-49	0.475918	0.84	0.583	3.37903e-44	C02 - CD4+ Th : GPR183 ADT-CD49fhi	KLF2
RPL51	5.69141e-48	0.416223	0.987	0.941	2.57189e-43	C02 - CD4+ Th : GPR183 ADT-CD49fhi	RPL5
RPL111	1.31897e-47	0.402096	0.995	0.982	5.96029e-43	C02 - CD4+ Th : GPR183 ADT-CD49fhi	RPL11
RPL391	7.2222e-47	0.377561	0.994	0.977	3.26364e-42	C02 - CD4+ Th : GPR183 ADT-CD49fhi	RPL39
RPS181	1.67658e-46	0.383218	0.997	0.987	7.57631e-42	C02 - CD4+ Th : GPR183 ADT-CD49fhi	RPS18
RPLP21	2.09089e-46	0.356286	0.996	0.975	9.44852e-42	C02 - CD4+ Th : GPR183 ADT-CD49fhi	RPLP2
PLAUR	3.03198e-46	0.529727	0.255	0.075	1.37012e-41	C02 - CD4+ Th : GPR183 ADT-CD49fhi	PLAUR
RPL101	2.56553e-45	0.355187	0.997	0.989	1.15934e-40	C02 - CD4+ Th : GPR183 ADT-CD49fhi	RPL10
RPL131	5.28671e-45	0.349489	0.999	0.993	2.38901e-40	C02 - CD4+ Th : GPR183 ADT-CD49fhi	RPL13
CREM	5.69862e-45	0.563969	0.898	0.722	2.57515e-40	C02 - CD4+ Th : GPR183 ADT-CD49fhi	CREM
PLK3	4.31815e-44	0.564572	0.658	0.405	1.95133e-39	C02 - CD4+ Th : GPR183 ADT-CD49fhi	PLK3
RP1-313I6.12	4.60507e-44	0.651561	0.322	0.117	2.08099e-39	C02 - CD4+ Th : GPR183 ADT-CD49fhi	RP1-313I6.12
KDM6B	1.51556e-43	0.572186	0.712	0.466	6.84868e-39	C02 - CD4+ Th : GPR183 ADT-CD49fhi	KDM6B
MYADM	1.60874e-43	0.498496	0.823	0.59	7.26975e-39	C02 - CD4+ Th : GPR183 ADT-CD49fhi	MYADM
VIM	2.35885e-43	0.687129	0.976	0.913	1.06594e-38	C02 - CD4+ Th : GPR183 ADT-CD49fhi	VIM
MARCKSL1	3.58857e-43	0.582329	0.588	0.332	1.62164e-38	C02 - CD4+ Th : GPR183 ADT-CD49fhi	MARCKSL1
RPL35A1	7.50358e-43	0.347191	0.989	0.965	3.3908e-38	C02 - CD4+ Th : GPR183 ADT-CD49fhi	RPL35A
RPL191	1.50691e-42	0.347745	0.995	0.981	6.80959e-38	C02 - CD4+ Th : GPR183 ADT-CD49fhi	RPL19
RPS251	1.25294e-41	0.333724	0.994	0.973	5.66192e-37	C02 - CD4+ Th : GPR183 ADT-CD49fhi	RPS25
TUBB4B	1.86722e-41	0.334693	0.947	0.777	8.43779e-37	C02 - CD4+ Th : GPR183 ADT-CD49fhi	TUBB4B
HSPA8	2.77354e-41	0.557713	0.98	0.922	1.25334e-36	C02 - CD4+ Th : GPR183 ADT-CD49fhi	HSPA8
PTGER41	3.24457e-40	0.562512	0.65	0.405	1.46619e-35	C02 - CD4+ Th : GPR183 ADT-CD49fhi	PTGER4
SLC2A31	7.12512e-40	0.582822	0.784	0.59	3.21977e-35	C02 - CD4+ Th : GPR183 ADT-CD49fhi	SLC2A3
HSPA5	1.53853e-39	0.482452	0.867	0.673	6.95245e-35	C02 - CD4+ Th : GPR183 ADT-CD49fhi	HSPA5
MCL1	2.2676e-39	0.467113	0.937	0.81	1.0247e-34	C02 - CD4+ Th : GPR183 ADT-CD49fhi	MCL1
RPL141	1.52413e-37	0.33823	0.992	0.967	6.88739e-33	C02 - CD4+ Th : GPR183 ADT-CD49fhi	RPL14
ARL4C1	3.32508e-37	0.539052	0.809	0.61	1.50257e-32	C02 - CD4+ Th : GPR183 ADT-CD49fhi	ARL4C
CD40LG1	3.68617e-37	0.678046	0.378	0.171	1.66574e-32	C02 - CD4+ Th : GPR183 ADT-CD49fhi	CD40LG
RPS271	3.87926e-37	0.315924	0.999	0.99	1.753e-32	C02 - CD4+ Th : GPR183 ADT-CD49fhi	RPS27
BTG1	4.55441e-37	0.373992	0.999	0.986	2.05809e-32	C02 - CD4+ Th : GPR183 ADT-CD49fhi	BTG1
UBE2S	7.09501e-37	0.402964	0.924	0.759	3.20617e-32	C02 - CD4+ Th : GPR183 ADT-CD49fhi	UBE2S
RPS201	1.0253e-36	0.404467	0.962	0.879	4.63324e-32	C02 - CD4+ Th : GPR183 ADT-CD49fhi	RPS20
NPM1	3.45314e-36	0.406408	0.955	0.86	1.56044e-31	C02 - CD4+ Th : GPR183 ADT-CD49fhi	NPM1
TNFAIP31	5.4383e-36	0.496429	0.958	0.845	2.45751e-31	C02 - CD4+ Th : GPR183 ADT-CD49fhi	TNFAIP3
CALM1	7.28665e-36	0.365641	0.976	0.917	3.29276e-31	C02 - CD4+ Th : GPR183 ADT-CD49fhi	CALM1
RPL371	1.51388e-35	0.343564	0.995	0.971	6.84109e-31	C02 - CD4+ Th : GPR183 ADT-CD49fhi	RPL37
RPS51	2.27097e-35	0.36088	0.973	0.936	1.02623e-30	C02 - CD4+ Th : GPR183 ADT-CD49fhi	RPS5
EEF1B21	1.34883e-34	0.40932	0.96	0.886	6.09524e-30	C02 - CD4+ Th : GPR183 ADT-CD49fhi	EEF1B2
TUBB2A	1.29704e-33	0.567252	0.462	0.257	5.86121e-29	C02 - CD4+ Th : GPR183 ADT-CD49fhi	TUBB2A
RPL23A1	1.49969e-33	0.279322	0.997	0.974	6.77693e-29	C02 - CD4+ Th : GPR183 ADT-CD49fhi	RPL23A
RPS22	2.44578e-33	0.297003	0.999	0.986	1.10523e-28	C02 - CD4+ Th : GPR183 ADT-CD49fhi	RPS2
RPL361	3.76649e-33	0.319614	0.991	0.947	1.70204e-28	C02 - CD4+ Th : GPR183 ADT-CD49fhi	RPL36
RPL18A1	3.82359e-33	0.310994	0.995	0.977	1.72784e-28	C02 - CD4+ Th : GPR183 ADT-CD49fhi	RPL18A
SERP1	5.0893e-33	0.413045	0.835	0.657	2.2998e-28	C02 - CD4+ Th : GPR183 ADT-CD49fhi	SERP1
DNAJA1	1.10379e-32	0.424391	0.981	0.889	4.98789e-28	C02 - CD4+ Th : GPR183 ADT-CD49fhi	DNAJA1
AQP31	1.28807e-32	0.473222	0.427	0.221	5.82068e-28	C02 - CD4+ Th : GPR183 ADT-CD49fhi	AQP3
RPL121	1.74783e-32	0.328252	0.994	0.97	7.89827e-28	C02 - CD4+ Th : GPR183 ADT-CD49fhi	RPL12
RPL181	2.72695e-32	0.301457	0.994	0.967	1.23228e-27	C02 - CD4+ Th : GPR183 ADT-CD49fhi	RPL18
ODC1	3.15121e-32	0.510541	0.715	0.51	1.424e-27	C02 - CD4+ Th : GPR183 ADT-CD49fhi	ODC1
RPL10A1	7.36832e-32	0.331663	0.987	0.951	3.32967e-27	C02 - CD4+ Th : GPR183 ADT-CD49fhi	RPL10A
RPS291	1.87645e-31	0.290171	0.99	0.969	8.47951e-27	C02 - CD4+ Th : GPR183 ADT-CD49fhi	RPS29
RPL61	4.97542e-31	0.289099	0.991	0.963	2.24834e-26	C02 - CD4+ Th : GPR183 ADT-CD49fhi	RPL6
DNAJB9	5.47793e-31	0.46926	0.585	0.37	2.47542e-26	C02 - CD4+ Th : GPR183 ADT-CD49fhi	DNAJB9
EIF4A3	7.09816e-31	0.372205	0.793	0.588	3.20759e-26	C02 - CD4+ Th : GPR183 ADT-CD49fhi	EIF4A3
SOD2	1.22321e-30	0.57858	0.529	0.326	5.52757e-26	C02 - CD4+ Th : GPR183 ADT-CD49fhi	SOD2
KLF3	1.41985e-30	0.424036	0.295	0.126	6.41618e-26	C02 - CD4+ Th : GPR183 ADT-CD49fhi	KLF3
RPS211	1.80621e-30	0.304255	0.991	0.954	8.16208e-26	C02 - CD4+ Th : GPR183 ADT-CD49fhi	RPS21
RPL211	1.82941e-30	0.350026	0.991	0.967	8.26692e-26	C02 - CD4+ Th : GPR183 ADT-CD49fhi	RPL21
RPL221	1.91724e-30	0.35854	0.98	0.921	8.66379e-26	C02 - CD4+ Th : GPR183 ADT-CD49fhi	RPL22
PNP	2.1734e-30	0.494547	0.52	0.311	9.82136e-26	C02 - CD4+ Th : GPR183 ADT-CD49fhi	PNP
RPS281	3.54906e-30	0.292428	0.995	0.974	1.60378e-25	C02 - CD4+ Th : GPR183 ADT-CD49fhi	RPS28
S100A101	1.17236e-29	0.492403	0.893	0.764	5.29778e-25	C02 - CD4+ Th : GPR183 ADT-CD49fhi	S100A10
CD44	1.41908e-29	0.399042	0.915	0.8	6.4127e-25	C02 - CD4+ Th : GPR183 ADT-CD49fhi	CD44
ATP1A1	1.61792e-29	0.423041	0.669	0.462	7.31124e-25	C02 - CD4+ Th : GPR183 ADT-CD49fhi	ATP1A1
RPL42	1.63711e-29	0.34992	0.958	0.881	7.39796e-25	C02 - CD4+ Th : GPR183 ADT-CD49fhi	RPL4
PTMA	1.78909e-29	0.274106	0.999	0.987	8.08472e-25	C02 - CD4+ Th : GPR183 ADT-CD49fhi	PTMA
RPL381	4.79991e-29	0.335248	0.972	0.929	2.16903e-24	C02 - CD4+ Th : GPR183 ADT-CD49fhi	RPL38
RPLP11	5.66027e-28	0.256834	1	0.992	2.55782e-23	C02 - CD4+ Th : GPR183 ADT-CD49fhi	RPLP1
GLTSCR2	2.93147e-27	0.527749	0.549	0.364	1.3247e-22	C02 - CD4+ Th : GPR183 ADT-CD49fhi	GLTSCR2
RPS10	3.09531e-27	0.326134	0.958	0.891	1.39874e-22	C02 - CD4+ Th : GPR183 ADT-CD49fhi	RPS10
ZBTB10	1.13872e-26	0.468437	0.289	0.132	5.14578e-22	C02 - CD4+ Th : GPR183 ADT-CD49fhi	ZBTB10
SEMA4A	2.3895e-26	0.463229	0.245	0.103	1.07979e-21	C02 - CD4+ Th : GPR183 ADT-CD49fhi	SEMA4A
TSC22D2	2.52204e-26	0.419435	0.47	0.277	1.13968e-21	C02 - CD4+ Th : GPR183 ADT-CD49fhi	TSC22D2
RPLP01	2.77342e-26	0.316014	0.967	0.893	1.25328e-21	C02 - CD4+ Th : GPR183 ADT-CD49fhi	RPLP0
RPL241	4.5291e-26	0.263114	0.987	0.962	2.04666e-21	C02 - CD4+ Th : GPR183 ADT-CD49fhi	RPL24
CSRNP1	7.5756e-26	0.34187	0.682	0.482	3.42334e-21	C02 - CD4+ Th : GPR183 ADT-CD49fhi	CSRNP1
SARAF1	1.26972e-25	0.35061	0.951	0.866	5.73774e-21	C02 - CD4+ Th : GPR183 ADT-CD49fhi	SARAF
ANK3	2.61172e-25	0.311336	0.217	0.086	1.18021e-20	C02 - CD4+ Th : GPR183 ADT-CD49fhi	ANK3
AMD1	3.38781e-25	0.326268	0.821	0.648	1.53092e-20	C02 - CD4+ Th : GPR183 ADT-CD49fhi	AMD1
RPSA1	5.04853e-25	0.29761	0.985	0.947	2.28138e-20	C02 - CD4+ Th : GPR183 ADT-CD49fhi	RPSA
IRS2	2.36108e-24	0.436612	0.427	0.248	1.06695e-19	C02 - CD4+ Th : GPR183 ADT-CD49fhi	IRS2
IL23A	6.17112e-24	0.371094	0.21	0.082	2.78867e-19	C02 - CD4+ Th : GPR183 ADT-CD49fhi	IL23A
FXYD51	9.101e-24	0.331113	0.84	0.681	4.11265e-19	C02 - CD4+ Th : GPR183 ADT-CD49fhi	FXYD5
ZFP36L2	1.65912e-23	0.419257	0.968	0.894	7.49741e-19	C02 - CD4+ Th : GPR183 ADT-CD49fhi	ZFP36L2
GTF2B	4.96615e-23	0.383489	0.698	0.519	2.24415e-18	C02 - CD4+ Th : GPR183 ADT-CD49fhi	GTF2B
PRNP	6.27751e-23	0.420593	0.54	0.357	2.83675e-18	C02 - CD4+ Th : GPR183 ADT-CD49fhi	PRNP
YIPF51	6.41793e-23	0.428492	0.37	0.217	2.9002e-18	C02 - CD4+ Th : GPR183 ADT-CD49fhi	YIPF5
NEU1	1.12027e-22	0.397083	0.691	0.508	5.06238e-18	C02 - CD4+ Th : GPR183 ADT-CD49fhi	NEU1
IDS	1.45239e-22	0.375676	0.782	0.625	6.56322e-18	C02 - CD4+ Th : GPR183 ADT-CD49fhi	IDS
CXCR4	1.63257e-22	0.350629	0.957	0.884	7.37742e-18	C02 - CD4+ Th : GPR183 ADT-CD49fhi	CXCR4
NANS	2.23986e-22	0.422645	0.37	0.214	1.01217e-17	C02 - CD4+ Th : GPR183 ADT-CD49fhi	NANS
RPL291	5.2054e-22	0.256465	0.986	0.963	2.35227e-17	C02 - CD4+ Th : GPR183 ADT-CD49fhi	RPL29
GLIPR11	5.61325e-22	0.447803	0.521	0.347	2.53657e-17	C02 - CD4+ Th : GPR183 ADT-CD49fhi	GLIPR1
SOCS3	5.9588e-22	0.40623	0.638	0.455	2.69272e-17	C02 - CD4+ Th : GPR183 ADT-CD49fhi	SOCS3
ARL4A	6.72721e-22	0.409597	0.553	0.375	3.03996e-17	C02 - CD4+ Th : GPR183 ADT-CD49fhi	ARL4A
RCAN31	1.12378e-21	0.299337	0.514	0.334	5.07824e-17	C02 - CD4+ Th : GPR183 ADT-CD49fhi	RCAN3
RPL271	1.20937e-21	0.273289	0.98	0.929	5.46501e-17	C02 - CD4+ Th : GPR183 ADT-CD49fhi	RPL27
CCDC109B	1.88004e-21	0.309892	0.282	0.14	8.49572e-17	C02 - CD4+ Th : GPR183 ADT-CD49fhi	CCDC109B
SELK	2.04123e-21	0.529168	0.537	0.361	9.22413e-17	C02 - CD4+ Th : GPR183 ADT-CD49fhi	SELK
PNRC1	2.41498e-21	0.328057	0.91	0.804	1.09131e-16	C02 - CD4+ Th : GPR183 ADT-CD49fhi	PNRC1
RPL13A1	3.31188e-21	0.25069	0.992	0.967	1.4966e-16	C02 - CD4+ Th : GPR183 ADT-CD49fhi	RPL13A
XBP1	3.81425e-21	0.372934	0.592	0.415	1.72362e-16	C02 - CD4+ Th : GPR183 ADT-CD49fhi	XBP1
HSP90AB1	4.5657e-21	0.319341	0.98	0.908	2.0632e-16	C02 - CD4+ Th : GPR183 ADT-CD49fhi	HSP90AB1
RPL311	4.85361e-21	0.30556	0.898	0.786	2.1933e-16	C02 - CD4+ Th : GPR183 ADT-CD49fhi	RPL31
CTSL1	5.32665e-21	0.337388	0.193	0.077	2.40706e-16	C02 - CD4+ Th : GPR183 ADT-CD49fhi	CTSL
ARID5A	7.33969e-21	0.384539	0.544	0.37	3.31673e-16	C02 - CD4+ Th : GPR183 ADT-CD49fhi	ARID5A
EMP1	1.05784e-20	0.273453	0.122	0.036	4.78026e-16	C02 - CD4+ Th : GPR183 ADT-CD49fhi	EMP1
TOMM71	1.19818e-20	0.255371	0.943	0.848	5.41446e-16	C02 - CD4+ Th : GPR183 ADT-CD49fhi	TOMM7
DNTTIP2	1.35157e-20	0.39006	0.524	0.354	6.1076e-16	C02 - CD4+ Th : GPR183 ADT-CD49fhi	DNTTIP2
CCDC64	1.7036e-20	0.399251	0.403	0.239	7.69839e-16	C02 - CD4+ Th : GPR183 ADT-CD49fhi	CCDC64
CYCS	1.8323e-20	0.374893	0.812	0.665	8.27997e-16	C02 - CD4+ Th : GPR183 ADT-CD49fhi	CYCS
RPS91	2.99812e-20	0.260956	0.99	0.966	1.35482e-15	C02 - CD4+ Th : GPR183 ADT-CD49fhi	RPS9
NAF1	3.26658e-20	0.395316	0.29	0.153	1.47614e-15	C02 - CD4+ Th : GPR183 ADT-CD49fhi	NAF1
SERTAD1	6.40894e-20	0.289978	0.769	0.605	2.89613e-15	C02 - CD4+ Th : GPR183 ADT-CD49fhi	SERTAD1
NFATC1	1.59102e-19	0.332326	0.255	0.125	7.18967e-15	C02 - CD4+ Th : GPR183 ADT-CD49fhi	NFATC1
CALM2	1.63975e-19	0.318753	0.881	0.773	7.40985e-15	C02 - CD4+ Th : GPR183 ADT-CD49fhi	CALM2
ELF1	2.91682e-19	0.331399	0.824	0.683	1.31808e-14	C02 - CD4+ Th : GPR183 ADT-CD49fhi	ELF1
JMJD1C	5.87092e-19	0.398438	0.63	0.473	2.65301e-14	C02 - CD4+ Th : GPR183 ADT-CD49fhi	JMJD1C
SDCBP	8.40972e-19	0.369331	0.768	0.618	3.80027e-14	C02 - CD4+ Th : GPR183 ADT-CD49fhi	SDCBP
PLAC8	1.23733e-18	0.251916	0.22	0.105	5.59135e-14	C02 - CD4+ Th : GPR183 ADT-CD49fhi	PLAC8
CHD2	1.2951e-18	0.2858	0.648	0.479	5.8524e-14	C02 - CD4+ Th : GPR183 ADT-CD49fhi	CHD2
SC5D	1.88771e-18	0.366431	0.356	0.208	8.53036e-14	C02 - CD4+ Th : GPR183 ADT-CD49fhi	SC5D
NASP	2.68547e-18	0.258779	0.729	0.566	1.21354e-13	C02 - CD4+ Th : GPR183 ADT-CD49fhi	NASP
TUBA1A	2.89835e-18	0.285344	0.813	0.667	1.30974e-13	C02 - CD4+ Th : GPR183 ADT-CD49fhi	TUBA1A
RORA1	2.9112e-18	0.331007	0.672	0.507	1.31554e-13	C02 - CD4+ Th : GPR183 ADT-CD49fhi	RORA
SKIL	3.26361e-18	0.341208	0.495	0.332	1.47479e-13	C02 - CD4+ Th : GPR183 ADT-CD49fhi	SKIL
LDHB1	5.58596e-18	0.315426	0.732	0.585	2.52424e-13	C02 - CD4+ Th : GPR183 ADT-CD49fhi	LDHB
ATP2B11	5.71233e-18	0.376368	0.518	0.356	2.58135e-13	C02 - CD4+ Th : GPR183 ADT-CD49fhi	ATP2B1
HNRNPA0	5.84783e-18	0.300159	0.694	0.533	2.64258e-13	C02 - CD4+ Th : GPR183 ADT-CD49fhi	HNRNPA0
RILPL21	7.03165e-18	0.413324	0.516	0.361	3.17753e-13	C02 - CD4+ Th : GPR183 ADT-CD49fhi	RILPL2
INSIG1	1.16876e-17	0.365565	0.378	0.229	5.28151e-13	C02 - CD4+ Th : GPR183 ADT-CD49fhi	INSIG1
DDX3X	1.20016e-17	0.276809	0.924	0.83	5.4234e-13	C02 - CD4+ Th : GPR183 ADT-CD49fhi	DDX3X
AP3M21	4.73963e-17	0.301717	0.335	0.195	2.14179e-12	C02 - CD4+ Th : GPR183 ADT-CD49fhi	AP3M2
MIR22HG	4.95806e-17	0.343601	0.268	0.145	2.2405e-12	C02 - CD4+ Th : GPR183 ADT-CD49fhi	MIR22HG
RPL71	5.04448e-17	0.274796	0.946	0.879	2.27955e-12	C02 - CD4+ Th : GPR183 ADT-CD49fhi	RPL7
ELL2	5.09822e-17	0.356072	0.371	0.229	2.30383e-12	C02 - CD4+ Th : GPR183 ADT-CD49fhi	ELL2
EEF21	5.98941e-17	0.25667	0.879	0.766	2.70656e-12	C02 - CD4+ Th : GPR183 ADT-CD49fhi	EEF2
MGAT4A1	6.19512e-17	0.290974	0.369	0.224	2.79951e-12	C02 - CD4+ Th : GPR183 ADT-CD49fhi	MGAT4A
EIF3E1	8.95282e-17	0.311525	0.773	0.637	4.04569e-12	C02 - CD4+ Th : GPR183 ADT-CD49fhi	EIF3E
PDE4B	1.34392e-16	0.352	0.587	0.435	6.07305e-12	C02 - CD4+ Th : GPR183 ADT-CD49fhi	PDE4B
CHMP1B	1.40951e-16	0.428926	0.553	0.405	6.36944e-12	C02 - CD4+ Th : GPR183 ADT-CD49fhi	CHMP1B
TGFB1	1.48896e-16	0.359123	0.722	0.584	6.72844e-12	C02 - CD4+ Th : GPR183 ADT-CD49fhi	TGFB1
BCAS2	1.59126e-16	0.271847	0.633	0.473	7.19076e-12	C02 - CD4+ Th : GPR183 ADT-CD49fhi	BCAS2
FAM46C	1.91586e-16	0.328874	0.381	0.238	8.65757e-12	C02 - CD4+ Th : GPR183 ADT-CD49fhi	FAM46C
CA5B	2.74745e-16	0.299317	0.244	0.126	1.24155e-11	C02 - CD4+ Th : GPR183 ADT-CD49fhi	CA5B
TIPARP	3.02162e-16	0.290247	0.523	0.366	1.36544e-11	C02 - CD4+ Th : GPR183 ADT-CD49fhi	TIPARP
LINC-PINT	3.68689e-16	0.360314	0.443	0.294	1.66607e-11	C02 - CD4+ Th : GPR183 ADT-CD49fhi	LINC-PINT
RNF139	4.28145e-16	0.298076	0.427	0.278	1.93474e-11	C02 - CD4+ Th : GPR183 ADT-CD49fhi	RNF139
RBM8A	5.51964e-16	0.266675	0.799	0.663	2.49427e-11	C02 - CD4+ Th : GPR183 ADT-CD49fhi	RBM8A
KLF6	6.03474e-16	0.289598	0.966	0.898	2.72704e-11	C02 - CD4+ Th : GPR183 ADT-CD49fhi	KLF6
PPP1R15A	6.31014e-16	0.327536	0.878	0.779	2.85149e-11	C02 - CD4+ Th : GPR183 ADT-CD49fhi	PPP1R15A
TUBA1C	7.45865e-16	0.297214	0.472	0.321	3.37049e-11	C02 - CD4+ Th : GPR183 ADT-CD49fhi	TUBA1C
DENND4A	9.88494e-16	0.275916	0.371	0.231	4.46691e-11	C02 - CD4+ Th : GPR183 ADT-CD49fhi	DENND4A
HSPH1	1.15034e-15	0.396818	0.807	0.676	5.19828e-11	C02 - CD4+ Th : GPR183 ADT-CD49fhi	HSPH1
SELENOK1	1.87689e-15	0.393908	0.326	0.336	8.48149e-11	C02 - CD4+ Th : GPR183 ADT-CD49fhi	SELENOK
AIM1	2.22926e-15	0.330327	0.277	0.155	1.00738e-10	C02 - CD4+ Th : GPR183 ADT-CD49fhi	AIM1
RNASET21	2.71196e-15	0.252386	0.51	0.359	1.22551e-10	C02 - CD4+ Th : GPR183 ADT-CD49fhi	RNASET2
HN1	2.85928e-15	0.323817	0.427	0.283	1.29208e-10	C02 - CD4+ Th : GPR183 ADT-CD49fhi	HN1
FAM107B1	5.65181e-15	0.391228	0.742	0.607	2.554e-10	C02 - CD4+ Th : GPR183 ADT-CD49fhi	FAM107B
PPP1CB1	6.35678e-15	0.270804	0.654	0.504	2.87257e-10	C02 - CD4+ Th : GPR183 ADT-CD49fhi	PPP1CB
TCF7	9.27757e-15	0.266555	0.453	0.309	4.19244e-10	C02 - CD4+ Th : GPR183 ADT-CD49fhi	TCF7
PMEPA1	1.03879e-14	0.291019	0.312	0.186	4.69418e-10	C02 - CD4+ Th : GPR183 ADT-CD49fhi	PMEPA1
MLF1	1.09097e-14	0.279903	0.164	0.073	4.92999e-10	C02 - CD4+ Th : GPR183 ADT-CD49fhi	MLF1
AC016831.7	5.17734e-14	0.283936	0.479	0.336	2.33959e-09	C02 - CD4+ Th : GPR183 ADT-CD49fhi	AC016831.7
GRPEL1	5.24863e-14	0.257627	0.37	0.238	2.3718e-09	C02 - CD4+ Th : GPR183 ADT-CD49fhi	GRPEL1
CDC42EP3	5.51507e-14	0.27436	0.418	0.28	2.49221e-09	C02 - CD4+ Th : GPR183 ADT-CD49fhi	CDC42EP3
FAM177A1	5.98647e-14	0.3158	0.625	0.486	2.70523e-09	C02 - CD4+ Th : GPR183 ADT-CD49fhi	FAM177A1
UAP1	7.51747e-14	0.318123	0.289	0.171	3.39707e-09	C02 - CD4+ Th : GPR183 ADT-CD49fhi	UAP1
GNB2L1	1.664e-13	0.370528	0.638	0.505	7.51946e-09	C02 - CD4+ Th : GPR183 ADT-CD49fhi	GNB2L1
BCL2A1	1.24695e-12	0.276774	0.221	0.12	5.63482e-08	C02 - CD4+ Th : GPR183 ADT-CD49fhi	BCL2A1
S100A111	1.28764e-12	0.322395	0.785	0.684	5.81873e-08	C02 - CD4+ Th : GPR183 ADT-CD49fhi	S100A11
OAT	1.83087e-12	0.263358	0.386	0.26	8.2735e-08	C02 - CD4+ Th : GPR183 ADT-CD49fhi	OAT
NFKB1	2.20821e-12	0.280684	0.458	0.326	9.97869e-08	C02 - CD4+ Th : GPR183 ADT-CD49fhi	NFKB1
TAGLN2	3.70049e-12	0.252286	0.785	0.674	1.67222e-07	C02 - CD4+ Th : GPR183 ADT-CD49fhi	TAGLN2
SATB1	1.04137e-11	0.264364	0.242	0.141	4.70585e-07	C02 - CD4+ Th : GPR183 ADT-CD49fhi	SATB1
ZNF267	1.94575e-11	0.308474	0.41	0.29	8.79265e-07	C02 - CD4+ Th : GPR183 ADT-CD49fhi	ZNF267
LRRFIP1	4.73905e-11	0.290425	0.682	0.562	2.14153e-06	C02 - CD4+ Th : GPR183 ADT-CD49fhi	LRRFIP1
MYC	5.11074e-11	0.38585	0.205	0.115	2.30949e-06	C02 - CD4+ Th : GPR183 ADT-CD49fhi	MYC
SGK1	5.15753e-11	0.265593	0.33	0.217	2.33063e-06	C02 - CD4+ Th : GPR183 ADT-CD49fhi	SGK1
RPL231	5.31399e-11	0.2829	0.917	0.858	2.40134e-06	C02 - CD4+ Th : GPR183 ADT-CD49fhi	RPL23
HBP1	8.12407e-11	0.25897	0.558	0.433	3.67119e-06	C02 - CD4+ Th : GPR183 ADT-CD49fhi	HBP1
AL121944.1	9.30197e-11	0.34564	0.153	0.081	4.20347e-06	C02 - CD4+ Th : GPR183 ADT-CD49fhi	AL121944.1
CCL201	3.32278e-10	0.540083	0.138	0.067	1.50153e-05	C02 - CD4+ Th : GPR183 ADT-CD49fhi	CCL20
KDSR1	3.38084e-10	0.25783	0.292	0.189	1.52777e-05	C02 - CD4+ Th : GPR183 ADT-CD49fhi	KDSR
PDCD4	6.32249e-10	0.253504	0.683	0.572	2.85707e-05	C02 - CD4+ Th : GPR183 ADT-CD49fhi	PDCD4
NXT1	9.81328e-10	0.25211	0.321	0.218	4.43452e-05	C02 - CD4+ Th : GPR183 ADT-CD49fhi	NXT1
CEBPB	2.62269e-09	0.251829	0.491	0.376	0.000118517	C02 - CD4+ Th : GPR183 ADT-CD49fhi	CEBPB
AHNAK	4.7897e-08	0.294855	0.669	0.57	0.00216442	C02 - CD4+ Th : GPR183 ADT-CD49fhi	AHNAK
PGAP1	2.32997e-06	0.25812	0.197	0.129	0.105289	C02 - CD4+ Th : GPR183 ADT-CD49fhi	PGAP1
GZMK	1.62669e-222	1.84401	0.879	0.337	7.35087e-218	C03 - CD8+ CTL : GZMK ADT-NKG2Dhi	GZMK
CCL4	5.35168e-210	2.14737	0.882	0.352	2.41837e-205	C03 - CD8+ CTL : GZMK ADT-NKG2Dhi	CCL4
CD8A	9.41348e-185	1.59492	0.722	0.189	4.25386e-180	C03 - CD8+ CTL : GZMK ADT-NKG2Dhi	CD8A
CCL5	9.9806e-180	1.31134	0.98	0.579	4.51014e-175	C03 - CD8+ CTL : GZMK ADT-NKG2Dhi	CCL5
NKG7	4.27193e-169	1.29781	0.85	0.322	1.93044e-164	C03 - CD8+ CTL : GZMK ADT-NKG2Dhi	NKG7
CD8B	3.65509e-135	1.34365	0.596	0.159	1.6517e-130	C03 - CD8+ CTL : GZMK ADT-NKG2Dhi	CD8B
GZMA	2.83371e-126	1.21502	0.853	0.415	1.28053e-121	C03 - CD8+ CTL : GZMK ADT-NKG2Dhi	GZMA
CST7	1.56301e-119	1.18376	0.817	0.476	7.06309e-115	C03 - CD8+ CTL : GZMK ADT-NKG2Dhi	CST7
CRTAM	1.52561e-100	1.33446	0.455	0.113	6.8941e-96	C03 - CD8+ CTL : GZMK ADT-NKG2Dhi	CRTAM
CCL4L2	4.25328e-91	2.18234	0.472	0.164	1.92201e-86	C03 - CD8+ CTL : GZMK ADT-NKG2Dhi	CCL4L2
TNFSF9	8.04579e-88	1.4875	0.491	0.189	3.63581e-83	C03 - CD8+ CTL : GZMK ADT-NKG2Dhi	TNFSF9
ITM2C	2.46464e-86	1.15269	0.508	0.197	1.11374e-81	C03 - CD8+ CTL : GZMK ADT-NKG2Dhi	ITM2C
IFNG	4.67969e-75	1.69473	0.594	0.289	2.11471e-70	C03 - CD8+ CTL : GZMK ADT-NKG2Dhi	IFNG
GZMH	3.4789e-68	1.27626	0.409	0.137	1.57208e-63	C03 - CD8+ CTL : GZMK ADT-NKG2Dhi	GZMH
GZMM	6.65299e-65	0.837633	0.63	0.393	3.00642e-60	C03 - CD8+ CTL : GZMK ADT-NKG2Dhi	GZMM
YBX3	5.93163e-63	1.03726	0.335	0.105	2.68044e-58	C03 - CD8+ CTL : GZMK ADT-NKG2Dhi	YBX3
HLA-DPB1	3.98919e-61	0.828347	0.728	0.526	1.80267e-56	C03 - CD8+ CTL : GZMK ADT-NKG2Dhi	HLA-DPB1
SRSF7	3.13943e-46	0.58183	0.94	0.926	1.41868e-41	C03 - CD8+ CTL : GZMK ADT-NKG2Dhi	SRSF7
TUBA4A	1.02673e-45	0.850712	0.706	0.56	4.63968e-41	C03 - CD8+ CTL : GZMK ADT-NKG2Dhi	TUBA4A
CMC1	2.15899e-44	0.86313	0.391	0.221	9.75624e-40	C03 - CD8+ CTL : GZMK ADT-NKG2Dhi	CMC1
KLRG1	1.10674e-43	0.765478	0.304	0.107	5.00127e-39	C03 - CD8+ CTL : GZMK ADT-NKG2Dhi	KLRG1
CCL3L3	4.53561e-40	0.986049	0.273	0.094	2.0496e-35	C03 - CD8+ CTL : GZMK ADT-NKG2Dhi	CCL3L3
COTL1	1.67231e-39	0.635567	0.764	0.641	7.55701e-35	C03 - CD8+ CTL : GZMK ADT-NKG2Dhi	COTL1
ZEB2	1.7804e-39	0.785219	0.489	0.256	8.04544e-35	C03 - CD8+ CTL : GZMK ADT-NKG2Dhi	ZEB2
DUSP2	2.37751e-39	0.679767	0.881	0.783	1.07437e-34	C03 - CD8+ CTL : GZMK ADT-NKG2Dhi	DUSP2
SRSF2	4.25417e-36	0.53715	0.895	0.822	1.92241e-31	C03 - CD8+ CTL : GZMK ADT-NKG2Dhi	SRSF2
SLA	1.90828e-35	0.797579	0.563	0.449	8.62333e-31	C03 - CD8+ CTL : GZMK ADT-NKG2Dhi	SLA
LAG3	1.39339e-34	0.60367	0.365	0.16	6.29659e-30	C03 - CD8+ CTL : GZMK ADT-NKG2Dhi	LAG3
CLEC2B	1.63344e-34	0.779772	0.685	0.489	7.38133e-30	C03 - CD8+ CTL : GZMK ADT-NKG2Dhi	CLEC2B
HLA-DPA1	3.08928e-34	0.621728	0.678	0.525	1.39601e-29	C03 - CD8+ CTL : GZMK ADT-NKG2Dhi	HLA-DPA1
HLA-DRB1	1.41354e-32	0.689372	0.711	0.511	6.38766e-28	C03 - CD8+ CTL : GZMK ADT-NKG2Dhi	HLA-DRB1
NR4A2	5.87215e-31	0.56788	0.859	0.727	2.65357e-26	C03 - CD8+ CTL : GZMK ADT-NKG2Dhi	NR4A2
TNF	1.21556e-27	1.02704	0.39	0.264	5.49299e-23	C03 - CD8+ CTL : GZMK ADT-NKG2Dhi	TNF
JMJD6	2.84305e-27	0.538057	0.427	0.289	1.28474e-22	C03 - CD8+ CTL : GZMK ADT-NKG2Dhi	JMJD6
LYAR	8.21457e-27	0.569799	0.453	0.279	3.71208e-22	C03 - CD8+ CTL : GZMK ADT-NKG2Dhi	LYAR
AOAH	2.19143e-26	0.478015	0.232	0.089	9.90284e-22	C03 - CD8+ CTL : GZMK ADT-NKG2Dhi	AOAH
CLDND1	1.5622e-25	0.393087	0.368	0.367	7.05943e-21	C03 - CD8+ CTL : GZMK ADT-NKG2Dhi	CLDND1
H3F3B	2.31747e-25	0.37654	0.991	0.987	1.04724e-20	C03 - CD8+ CTL : GZMK ADT-NKG2Dhi	H3F3B
SH2D1A	3.54988e-24	0.527722	0.386	0.287	1.60416e-19	C03 - CD8+ CTL : GZMK ADT-NKG2Dhi	SH2D1A
CD81	1.08428e-23	0.43428	0.708	0.611	4.89975e-19	C03 - CD8+ CTL : GZMK ADT-NKG2Dhi	CD81
RNF19A	1.40242e-23	0.516406	0.636	0.536	6.3374e-19	C03 - CD8+ CTL : GZMK ADT-NKG2Dhi	RNF19A
SLAMF7	1.95184e-23	0.410153	0.173	0.059	8.82016e-19	C03 - CD8+ CTL : GZMK ADT-NKG2Dhi	SLAMF7
GYG1	4.0846e-23	0.433622	0.243	0.157	1.84579e-18	C03 - CD8+ CTL : GZMK ADT-NKG2Dhi	GYG1
HCST	5.42241e-23	0.480148	0.843	0.752	2.45033e-18	C03 - CD8+ CTL : GZMK ADT-NKG2Dhi	HCST
HLA-DQA1	1.14094e-22	0.647478	0.427	0.259	5.1558e-18	C03 - CD8+ CTL : GZMK ADT-NKG2Dhi	HLA-DQA1
LITAF	6.41507e-22	0.482041	0.541	0.47	2.89891e-17	C03 - CD8+ CTL : GZMK ADT-NKG2Dhi	LITAF
PPP1R14B	6.4806e-22	0.566346	0.396	0.295	2.92852e-17	C03 - CD8+ CTL : GZMK ADT-NKG2Dhi	PPP1R14B
TAGAP	7.70211e-22	0.535598	0.655	0.567	3.48051e-17	C03 - CD8+ CTL : GZMK ADT-NKG2Dhi	TAGAP
APOBEC3G	9.05736e-22	0.525017	0.609	0.449	4.09293e-17	C03 - CD8+ CTL : GZMK ADT-NKG2Dhi	APOBEC3G
TRGC2	9.81144e-22	0.622597	0.348	0.188	4.43369e-17	C03 - CD8+ CTL : GZMK ADT-NKG2Dhi	TRGC2
HLA-DQB1	3.24143e-21	0.553404	0.407	0.302	1.46477e-16	C03 - CD8+ CTL : GZMK ADT-NKG2Dhi	HLA-DQB1
PIK3R1	3.4794e-21	0.548404	0.496	0.419	1.57231e-16	C03 - CD8+ CTL : GZMK ADT-NKG2Dhi	PIK3R1
AMD11	9.15177e-21	0.366163	0.676	0.665	4.13559e-16	C03 - CD8+ CTL : GZMK ADT-NKG2Dhi	AMD1
SAMD3	1.07863e-20	0.477967	0.376	0.22	4.87423e-16	C03 - CD8+ CTL : GZMK ADT-NKG2Dhi	SAMD3
HLA-DRA	9.59499e-20	0.550116	0.541	0.405	4.33588e-15	C03 - CD8+ CTL : GZMK ADT-NKG2Dhi	HLA-DRA
EOMES	3.86372e-19	0.434334	0.174	0.067	1.74598e-14	C03 - CD8+ CTL : GZMK ADT-NKG2Dhi	EOMES
RAB8B	8.65465e-19	0.277656	0.321	0.32	3.91095e-14	C03 - CD8+ CTL : GZMK ADT-NKG2Dhi	RAB8B
C12orf75	1.20236e-18	0.470343	0.41	0.3	5.43333e-14	C03 - CD8+ CTL : GZMK ADT-NKG2Dhi	C12orf75
EGR2	2.53856e-18	0.599023	0.227	0.132	1.14715e-13	C03 - CD8+ CTL : GZMK ADT-NKG2Dhi	EGR2
C16orf72	1.87514e-17	0.35856	0.334	0.27	8.47356e-13	C03 - CD8+ CTL : GZMK ADT-NKG2Dhi	C16orf72
DTHD1	2.98813e-17	0.38312	0.164	0.063	1.35031e-12	C03 - CD8+ CTL : GZMK ADT-NKG2Dhi	DTHD1
RUNX3	4.08023e-17	0.417022	0.606	0.518	1.84382e-12	C03 - CD8+ CTL : GZMK ADT-NKG2Dhi	RUNX3
GGA2	4.96764e-17	0.424971	0.23	0.13	2.24483e-12	C03 - CD8+ CTL : GZMK ADT-NKG2Dhi	GGA2
UBE2S1	5.54144e-17	0.399275	0.81	0.773	2.50412e-12	C03 - CD8+ CTL : GZMK ADT-NKG2Dhi	UBE2S
SMARCD3	1.35614e-16	0.316113	0.102	0.031	6.12827e-12	C03 - CD8+ CTL : GZMK ADT-NKG2Dhi	SMARCD3
PTPRC	1.96749e-16	0.305078	0.928	0.915	8.89089e-12	C03 - CD8+ CTL : GZMK ADT-NKG2Dhi	PTPRC
APMAP	2.25278e-16	0.343111	0.26	0.191	1.01801e-11	C03 - CD8+ CTL : GZMK ADT-NKG2Dhi	APMAP
CMC2	2.5984e-16	0.317256	0.43	0.38	1.17419e-11	C03 - CD8+ CTL : GZMK ADT-NKG2Dhi	CMC2
HERPUD2	3.6142e-16	0.348853	0.351	0.282	1.63322e-11	C03 - CD8+ CTL : GZMK ADT-NKG2Dhi	HERPUD2
PPP2R5C	5.14673e-16	0.348913	0.754	0.685	2.32576e-11	C03 - CD8+ CTL : GZMK ADT-NKG2Dhi	PPP2R5C
NR4A3	7.57981e-16	0.495947	0.413	0.322	3.42524e-11	C03 - CD8+ CTL : GZMK ADT-NKG2Dhi	NR4A3
PLEK	1.04392e-15	0.339898	0.153	0.063	4.71738e-11	C03 - CD8+ CTL : GZMK ADT-NKG2Dhi	PLEK
XCL2	1.41079e-15	0.850496	0.312	0.182	6.37521e-11	C03 - CD8+ CTL : GZMK ADT-NKG2Dhi	XCL2
SDCBP1	1.81598e-15	0.420345	0.682	0.629	8.20621e-11	C03 - CD8+ CTL : GZMK ADT-NKG2Dhi	SDCBP
RABAC1	3.4386e-15	0.314376	0.521	0.477	1.55387e-10	C03 - CD8+ CTL : GZMK ADT-NKG2Dhi	RABAC1
CD74	5.85577e-15	0.399553	0.787	0.701	2.64617e-10	C03 - CD8+ CTL : GZMK ADT-NKG2Dhi	CD74
NAA50	7.12226e-15	0.368124	0.329	0.237	3.21848e-10	C03 - CD8+ CTL : GZMK ADT-NKG2Dhi	NAA50
HMGA1	7.53511e-15	0.278663	0.24	0.207	3.40504e-10	C03 - CD8+ CTL : GZMK ADT-NKG2Dhi	HMGA1
NFKBID	7.67079e-15	0.511643	0.355	0.262	3.46635e-10	C03 - CD8+ CTL : GZMK ADT-NKG2Dhi	NFKBID
AKNA	2.92216e-14	0.397139	0.432	0.328	1.32049e-09	C03 - CD8+ CTL : GZMK ADT-NKG2Dhi	AKNA
CXCR41	2.98349e-14	0.378506	0.934	0.888	1.34821e-09	C03 - CD8+ CTL : GZMK ADT-NKG2Dhi	CXCR4
C1orf21	5.18129e-14	0.264766	0.111	0.038	2.34137e-09	C03 - CD8+ CTL : GZMK ADT-NKG2Dhi	C1orf21
PTMS	5.51723e-14	0.457084	0.332	0.226	2.49318e-09	C03 - CD8+ CTL : GZMK ADT-NKG2Dhi	PTMS
LYST	6.27339e-14	0.354165	0.365	0.314	2.83488e-09	C03 - CD8+ CTL : GZMK ADT-NKG2Dhi	LYST
ISG20L2	8.7552e-14	0.334733	0.247	0.188	3.95639e-09	C03 - CD8+ CTL : GZMK ADT-NKG2Dhi	ISG20L2
BRD2	1.08466e-13	0.282048	0.727	0.705	4.90149e-09	C03 - CD8+ CTL : GZMK ADT-NKG2Dhi	BRD2
FASLG	1.08467e-13	0.502289	0.18	0.1	4.90152e-09	C03 - CD8+ CTL : GZMK ADT-NKG2Dhi	FASLG
PLA2G16	4.14292e-13	0.344385	0.222	0.159	1.87214e-08	C03 - CD8+ CTL : GZMK ADT-NKG2Dhi	PLA2G16
MCOLN2	4.20857e-13	0.290258	0.141	0.064	1.90181e-08	C03 - CD8+ CTL : GZMK ADT-NKG2Dhi	MCOLN2
FCRL6	5.58651e-13	0.313669	0.128	0.055	2.52449e-08	C03 - CD8+ CTL : GZMK ADT-NKG2Dhi	FCRL6
MYADM1	1.04789e-12	0.341841	0.66	0.61	4.73529e-08	C03 - CD8+ CTL : GZMK ADT-NKG2Dhi	MYADM
RARRES3	1.14381e-12	0.341974	0.62	0.556	5.16877e-08	C03 - CD8+ CTL : GZMK ADT-NKG2Dhi	RARRES3
SRRT	1.25581e-12	0.3077	0.187	0.13	5.67487e-08	C03 - CD8+ CTL : GZMK ADT-NKG2Dhi	SRRT
RASGEF1B	1.60935e-12	0.419333	0.357	0.279	7.27248e-08	C03 - CD8+ CTL : GZMK ADT-NKG2Dhi	RASGEF1B
CD481	1.69929e-12	0.31783	0.8	0.724	7.6789e-08	C03 - CD8+ CTL : GZMK ADT-NKG2Dhi	CD48
PIP4K2A	2.0487e-12	0.259619	0.393	0.36	9.25789e-08	C03 - CD8+ CTL : GZMK ADT-NKG2Dhi	PIP4K2A
ERO1B	2.66865e-12	0.337929	0.331	0.268	1.20594e-07	C03 - CD8+ CTL : GZMK ADT-NKG2Dhi	ERO1B
TSC22D21	2.8562e-12	0.344114	0.344	0.292	1.29069e-07	C03 - CD8+ CTL : GZMK ADT-NKG2Dhi	TSC22D2
CD69	3.86594e-12	0.320798	0.892	0.822	1.74698e-07	C03 - CD8+ CTL : GZMK ADT-NKG2Dhi	CD69
YPEL51	4.3341e-12	0.318936	0.796	0.757	1.95854e-07	C03 - CD8+ CTL : GZMK ADT-NKG2Dhi	YPEL5
SAP18	4.63756e-12	0.297714	0.758	0.757	2.09566e-07	C03 - CD8+ CTL : GZMK ADT-NKG2Dhi	SAP18
ALKBH5	1.72059e-11	0.25579	0.232	0.204	7.77517e-07	C03 - CD8+ CTL : GZMK ADT-NKG2Dhi	ALKBH5
OASL	1.90865e-11	0.450019	0.351	0.259	8.62501e-07	C03 - CD8+ CTL : GZMK ADT-NKG2Dhi	OASL
ITGA1	2.14652e-11	0.331271	0.203	0.109	9.69991e-07	C03 - CD8+ CTL : GZMK ADT-NKG2Dhi	ITGA1
REEP5	2.31455e-11	0.284685	0.481	0.45	1.04592e-06	C03 - CD8+ CTL : GZMK ADT-NKG2Dhi	REEP5
PYHIN1	4.31388e-11	0.391259	0.319	0.236	1.9494e-06	C03 - CD8+ CTL : GZMK ADT-NKG2Dhi	PYHIN1
CCL3	4.6293e-11	0.466565	0.222	0.123	2.09194e-06	C03 - CD8+ CTL : GZMK ADT-NKG2Dhi	CCL3
PRKCB	5.43164e-11	0.281868	0.242	0.195	2.4545e-06	C03 - CD8+ CTL : GZMK ADT-NKG2Dhi	PRKCB
FABP5	6.09096e-11	0.453349	0.364	0.273	2.75244e-06	C03 - CD8+ CTL : GZMK ADT-NKG2Dhi	FABP5
ANXA12	6.32582e-11	0.303007	0.786	0.662	2.85857e-06	C03 - CD8+ CTL : GZMK ADT-NKG2Dhi	ANXA1
DDX3X1	6.52471e-11	0.283246	0.862	0.838	2.94845e-06	C03 - CD8+ CTL : GZMK ADT-NKG2Dhi	DDX3X
NEU11	7.38984e-11	0.353152	0.577	0.523	3.33939e-06	C03 - CD8+ CTL : GZMK ADT-NKG2Dhi	NEU1
PPP2R2B	1.17097e-10	0.264814	0.138	0.068	5.2915e-06	C03 - CD8+ CTL : GZMK ADT-NKG2Dhi	PPP2R2B
IER2	1.17629e-10	0.267388	0.842	0.771	5.31554e-06	C03 - CD8+ CTL : GZMK ADT-NKG2Dhi	IER2
IFRD1	1.18179e-10	0.266478	0.542	0.534	5.34038e-06	C03 - CD8+ CTL : GZMK ADT-NKG2Dhi	IFRD1
HLA-DQA2	1.44594e-10	0.3442	0.177	0.097	6.53404e-06	C03 - CD8+ CTL : GZMK ADT-NKG2Dhi	HLA-DQA2
DUSP6	1.68929e-10	0.370455	0.187	0.125	7.63374e-06	C03 - CD8+ CTL : GZMK ADT-NKG2Dhi	DUSP6
CDC42EP31	1.94622e-10	0.258912	0.315	0.293	8.79477e-06	C03 - CD8+ CTL : GZMK ADT-NKG2Dhi	CDC42EP3
RAB27A	2.15459e-10	0.254271	0.348	0.311	9.73637e-06	C03 - CD8+ CTL : GZMK ADT-NKG2Dhi	RAB27A
GABARAPL1	2.81993e-10	0.31372	0.401	0.335	1.2743e-05	C03 - CD8+ CTL : GZMK ADT-NKG2Dhi	GABARAPL1
LDHA	3.53011e-10	0.283441	0.754	0.746	1.59522e-05	C03 - CD8+ CTL : GZMK ADT-NKG2Dhi	LDHA
PRKCH	3.61063e-10	0.251728	0.399	0.359	1.63161e-05	C03 - CD8+ CTL : GZMK ADT-NKG2Dhi	PRKCH
RILPL22	6.72799e-10	0.314046	0.397	0.375	3.04031e-05	C03 - CD8+ CTL : GZMK ADT-NKG2Dhi	RILPL2
HLA-DRB5	1.02548e-09	0.364917	0.281	0.194	4.63405e-05	C03 - CD8+ CTL : GZMK ADT-NKG2Dhi	HLA-DRB5
APBA2	1.15759e-09	0.286654	0.154	0.086	5.23102e-05	C03 - CD8+ CTL : GZMK ADT-NKG2Dhi	APBA2
SERTAD11	1.48155e-09	0.305312	0.65	0.619	6.69498e-05	C03 - CD8+ CTL : GZMK ADT-NKG2Dhi	SERTAD1
CBLB	1.49631e-09	0.27708	0.322	0.274	6.76167e-05	C03 - CD8+ CTL : GZMK ADT-NKG2Dhi	CBLB
STK17A	2.15888e-09	0.26912	0.719	0.683	9.75577e-05	C03 - CD8+ CTL : GZMK ADT-NKG2Dhi	STK17A
HLA-DMA	2.52867e-09	0.26891	0.286	0.23	0.000114268	C03 - CD8+ CTL : GZMK ADT-NKG2Dhi	HLA-DMA
CD96	2.80411e-09	0.250342	0.498	0.462	0.000126715	C03 - CD8+ CTL : GZMK ADT-NKG2Dhi	CD96
MLLT3	2.98494e-09	0.289464	0.242	0.182	0.000134887	C03 - CD8+ CTL : GZMK ADT-NKG2Dhi	MLLT3
MARCKSL11	4.0568e-09	0.309809	0.396	0.356	0.000183323	C03 - CD8+ CTL : GZMK ADT-NKG2Dhi	MARCKSL1
SLC1A5	4.20358e-09	0.26456	0.272	0.212	0.000189955	C03 - CD8+ CTL : GZMK ADT-NKG2Dhi	SLC1A5
MIAT	4.369e-09	0.305356	0.294	0.199	0.000197431	C03 - CD8+ CTL : GZMK ADT-NKG2Dhi	MIAT
CD99	6.284e-09	0.256495	0.729	0.673	0.000283968	C03 - CD8+ CTL : GZMK ADT-NKG2Dhi	CD99
CD3D	8.69333e-09	0.253274	0.868	0.796	0.000392843	C03 - CD8+ CTL : GZMK ADT-NKG2Dhi	CD3D
ZFP36L1	1.5136e-08	0.275286	0.688	0.707	0.00068398	C03 - CD8+ CTL : GZMK ADT-NKG2Dhi	ZFP36L1
TBCD	1.81976e-08	0.25631	0.194	0.138	0.000822331	C03 - CD8+ CTL : GZMK ADT-NKG2Dhi	TBCD
CD3G	2.58673e-08	0.271139	0.614	0.566	0.00116892	C03 - CD8+ CTL : GZMK ADT-NKG2Dhi	CD3G
BTN3A1	3.24164e-08	0.256983	0.239	0.192	0.00146486	C03 - CD8+ CTL : GZMK ADT-NKG2Dhi	BTN3A1
THEMIS	3.37482e-08	0.285743	0.229	0.149	0.00152505	C03 - CD8+ CTL : GZMK ADT-NKG2Dhi	THEMIS
RGCC1	4.08313e-08	0.278621	0.823	0.808	0.00184512	C03 - CD8+ CTL : GZMK ADT-NKG2Dhi	RGCC
MIDN	4.13481e-08	0.282829	0.488	0.425	0.00186848	C03 - CD8+ CTL : GZMK ADT-NKG2Dhi	MIDN
MAP3K8	9.12896e-08	0.271046	0.229	0.189	0.00412529	C03 - CD8+ CTL : GZMK ADT-NKG2Dhi	MAP3K8
FAM53C	1.26351e-07	0.25729	0.337	0.291	0.00570965	C03 - CD8+ CTL : GZMK ADT-NKG2Dhi	FAM53C
RP11-489E7.4	2.27785e-07	0.276538	0.201	0.183	0.0102934	C03 - CD8+ CTL : GZMK ADT-NKG2Dhi	RP11-489E7.4
TMEM2	4.6808e-07	0.273122	0.255	0.231	0.0211521	C03 - CD8+ CTL : GZMK ADT-NKG2Dhi	TMEM2
ODC11	6.47253e-07	0.253792	0.57	0.527	0.0292487	C03 - CD8+ CTL : GZMK ADT-NKG2Dhi	ODC1
CHST12	6.51129e-07	0.268032	0.245	0.197	0.0294239	C03 - CD8+ CTL : GZMK ADT-NKG2Dhi	CHST12
CITED2	7.22259e-07	0.310541	0.469	0.405	0.0326382	C03 - CD8+ CTL : GZMK ADT-NKG2Dhi	CITED2
PMEPA11	2.03119e-06	0.253473	0.236	0.195	0.0917874	C03 - CD8+ CTL : GZMK ADT-NKG2Dhi	PMEPA1
ATF3	3.29573e-06	0.337163	0.412	0.354	0.148931	C03 - CD8+ CTL : GZMK ADT-NKG2Dhi	ATF3
MYC1	3.97665e-06	0.252877	0.127	0.124	0.179701	C03 - CD8+ CTL : GZMK ADT-NKG2Dhi	MYC
GLUL	5.51036e-06	0.292932	0.253	0.201	0.249007	C03 - CD8+ CTL : GZMK ADT-NKG2Dhi	GLUL
ID2	5.579e-06	0.271121	0.717	0.656	0.25211	C03 - CD8+ CTL : GZMK ADT-NKG2Dhi	ID2
CEMIP2	8.55478e-06	0.271478	0.21	0.188	0.386582	C03 - CD8+ CTL : GZMK ADT-NKG2Dhi	CEMIP2
IGKC	0.00116849	0.451089	0.272	0.336	1	C03 - CD8+ CTL : GZMK ADT-NKG2Dhi	IGKC
KLRD1	4.53228e-100	0.805654	0.564	0.18	2.04809e-95	C04 - CD8+ CTL : METRNL ADT-NKG2Dmid	KLRD1
NKG71	1.30019e-98	0.318918	0.733	0.337	5.87545e-94	C04 - CD8+ CTL : METRNL ADT-NKG2Dmid	NKG7
CCL51	4.38473e-87	0.69202	0.932	0.586	1.98141e-82	C04 - CD8+ CTL : METRNL ADT-NKG2Dmid	CCL5
TRGC21	6.82359e-83	1.06951	0.531	0.173	3.08351e-78	C04 - CD8+ CTL : METRNL ADT-NKG2Dmid	TRGC2
CD8A1	1.33273e-68	0.792266	0.54	0.21	6.02248e-64	C04 - CD8+ CTL : METRNL ADT-NKG2Dmid	CD8A
ZFP36L21	2.53501e-65	0.793041	0.984	0.894	1.14555e-60	C04 - CD8+ CTL : METRNL ADT-NKG2Dmid	ZFP36L2
YPEL52	1.94698e-64	0.807731	0.918	0.746	8.79822e-60	C04 - CD8+ CTL : METRNL ADT-NKG2Dmid	YPEL5
METRNL	2.03414e-64	1.0248	0.675	0.358	9.19207e-60	C04 - CD8+ CTL : METRNL ADT-NKG2Dmid	METRNL
CD8B1	9.81075e-63	0.76709	0.477	0.173	4.43338e-58	C04 - CD8+ CTL : METRNL ADT-NKG2Dmid	CD8B
EIF4A31	1.87663e-61	0.893839	0.796	0.593	8.4803e-57	C04 - CD8+ CTL : METRNL ADT-NKG2Dmid	EIF4A3
CTSW	8.1353e-55	0.728747	0.531	0.227	3.67626e-50	C04 - CD8+ CTL : METRNL ADT-NKG2Dmid	CTSW
TRDC	3.56913e-50	1.30474	0.309	0.088	1.61285e-45	C04 - CD8+ CTL : METRNL ADT-NKG2Dmid	TRDC
ZFP361	4.90419e-50	0.649166	0.961	0.832	2.21615e-45	C04 - CD8+ CTL : METRNL ADT-NKG2Dmid	ZFP36
CD551	1.14875e-49	0.769862	0.662	0.37	5.19108e-45	C04 - CD8+ CTL : METRNL ADT-NKG2Dmid	CD55
XCL1	2.18497e-49	0.773287	0.388	0.137	9.87367e-45	C04 - CD8+ CTL : METRNL ADT-NKG2Dmid	XCL1
XCL21	3.68936e-48	0.279043	0.413	0.173	1.66719e-43	C04 - CD8+ CTL : METRNL ADT-NKG2Dmid	XCL2
FOSB	7.42085e-48	0.594371	0.951	0.851	3.35341e-43	C04 - CD8+ CTL : METRNL ADT-NKG2Dmid	FOSB
ZNF683	1.41372e-47	0.573005	0.35	0.118	6.38844e-43	C04 - CD8+ CTL : METRNL ADT-NKG2Dmid	ZNF683
ZNF331	3.26489e-46	0.789194	0.805	0.598	1.47537e-41	C04 - CD8+ CTL : METRNL ADT-NKG2Dmid	ZNF331
MYADM2	1.1611e-44	0.674816	0.827	0.595	5.24689e-40	C04 - CD8+ CTL : METRNL ADT-NKG2Dmid	MYADM
HOMER1	4.84669e-44	0.642916	0.251	0.065	2.19017e-39	C04 - CD8+ CTL : METRNL ADT-NKG2Dmid	HOMER1
TUBA4A1	1.08083e-43	0.808856	0.779	0.555	4.88416e-39	C04 - CD8+ CTL : METRNL ADT-NKG2Dmid	TUBA4A
AREG	5.40019e-43	0.756165	0.587	0.309	2.44029e-38	C04 - CD8+ CTL : METRNL ADT-NKG2Dmid	AREG
CD7	2.78381e-42	0.682037	0.799	0.566	1.25798e-37	C04 - CD8+ CTL : METRNL ADT-NKG2Dmid	CD7
TRGC1	2.19167e-41	0.765346	0.256	0.074	9.90392e-37	C04 - CD8+ CTL : METRNL ADT-NKG2Dmid	TRGC1
CXCR42	3.55139e-41	0.627422	0.962	0.886	1.60484e-36	C04 - CD8+ CTL : METRNL ADT-NKG2Dmid	CXCR4
EZR1	8.64141e-41	0.688271	0.856	0.729	3.90497e-36	C04 - CD8+ CTL : METRNL ADT-NKG2Dmid	EZR
LDLRAD4	1.78144e-40	0.953724	0.447	0.269	8.05015e-36	C04 - CD8+ CTL : METRNL ADT-NKG2Dmid	LDLRAD4
MATK	4.96559e-40	0.511579	0.386	0.156	2.2439e-35	C04 - CD8+ CTL : METRNL ADT-NKG2Dmid	MATK
UBE2S2	6.09928e-39	0.622021	0.881	0.767	2.75621e-34	C04 - CD8+ CTL : METRNL ADT-NKG2Dmid	UBE2S
LYAR1	7.73264e-39	0.581188	0.534	0.273	3.4943e-34	C04 - CD8+ CTL : METRNL ADT-NKG2Dmid	LYAR
CD9	1.27014e-38	0.612073	0.272	0.083	5.73966e-34	C04 - CD8+ CTL : METRNL ADT-NKG2Dmid	CD9
KLRC2	3.72414e-38	0.646205	0.223	0.056	1.6829e-33	C04 - CD8+ CTL : METRNL ADT-NKG2Dmid	KLRC2
MCL11	1.63665e-37	0.55816	0.926	0.814	7.39584e-33	C04 - CD8+ CTL : METRNL ADT-NKG2Dmid	MCL1
KDM6B1	2.14418e-36	0.597564	0.714	0.472	9.68935e-32	C04 - CD8+ CTL : METRNL ADT-NKG2Dmid	KDM6B
LITAF1	1.64119e-35	0.680243	0.666	0.459	7.41636e-31	C04 - CD8+ CTL : METRNL ADT-NKG2Dmid	LITAF
FAM177A11	3.61617e-35	0.655028	0.689	0.483	1.63411e-30	C04 - CD8+ CTL : METRNL ADT-NKG2Dmid	FAM177A1
RGCC2	8.95344e-35	0.639732	0.934	0.798	4.04597e-30	C04 - CD8+ CTL : METRNL ADT-NKG2Dmid	RGCC
RALGAPA1	2.57178e-33	0.602708	0.615	0.387	1.16216e-28	C04 - CD8+ CTL : METRNL ADT-NKG2Dmid	RALGAPA1
GABARAPL11	3.72008e-33	0.588066	0.559	0.321	1.68106e-28	C04 - CD8+ CTL : METRNL ADT-NKG2Dmid	GABARAPL1
PRMT9	5.8827e-33	0.590604	0.452	0.227	2.65834e-28	C04 - CD8+ CTL : METRNL ADT-NKG2Dmid	PRMT9
DUSP21	3.21394e-32	0.528534	0.92	0.781	1.45235e-27	C04 - CD8+ CTL : METRNL ADT-NKG2Dmid	DUSP2
RP1-313I6.121	1.10673e-31	0.682193	0.311	0.123	5.0012e-27	C04 - CD8+ CTL : METRNL ADT-NKG2Dmid	RP1-313I6.12
GPR65	2.70662e-31	0.624233	0.46	0.247	1.22309e-26	C04 - CD8+ CTL : METRNL ADT-NKG2Dmid	GPR65
ATP1B3	7.64258e-31	0.73251	0.681	0.536	3.45361e-26	C04 - CD8+ CTL : METRNL ADT-NKG2Dmid	ATP1B3
CLEC2B1	9.34028e-31	0.433542	0.725	0.487	4.22078e-26	C04 - CD8+ CTL : METRNL ADT-NKG2Dmid	CLEC2B
YBX31	1.10964e-30	0.532308	0.29	0.111	5.01437e-26	C04 - CD8+ CTL : METRNL ADT-NKG2Dmid	YBX3
MARCKSL12	2.74826e-30	0.607788	0.568	0.34	1.24191e-25	C04 - CD8+ CTL : METRNL ADT-NKG2Dmid	MARCKSL1
GLUL1	1.77705e-29	0.717207	0.389	0.189	8.03031e-25	C04 - CD8+ CTL : METRNL ADT-NKG2Dmid	GLUL
EIF11	7.93485e-29	0.289179	1	0.986	3.58568e-24	C04 - CD8+ CTL : METRNL ADT-NKG2Dmid	EIF1
ABCB1	3.02785e-28	0.319947	0.19	0.055	1.36826e-23	C04 - CD8+ CTL : METRNL ADT-NKG2Dmid	ABCB1
ANKRD37	3.51355e-28	0.77415	0.482	0.3	1.58774e-23	C04 - CD8+ CTL : METRNL ADT-NKG2Dmid	ANKRD37
SLC7A5	4.74201e-28	0.580419	0.466	0.26	2.14287e-23	C04 - CD8+ CTL : METRNL ADT-NKG2Dmid	SLC7A5
MAFF	9.48349e-28	0.551747	0.352	0.162	4.28549e-23	C04 - CD8+ CTL : METRNL ADT-NKG2Dmid	MAFF
HOPX	1.77692e-27	0.655545	0.454	0.245	8.0297e-23	C04 - CD8+ CTL : METRNL ADT-NKG2Dmid	HOPX
TGFB11	2.54701e-27	0.544665	0.752	0.584	1.15097e-22	C04 - CD8+ CTL : METRNL ADT-NKG2Dmid	TGFB1
REL	3.28887e-27	0.463954	0.865	0.705	1.48621e-22	C04 - CD8+ CTL : METRNL ADT-NKG2Dmid	REL
RANBP2	3.63316e-27	0.583576	0.488	0.297	1.64179e-22	C04 - CD8+ CTL : METRNL ADT-NKG2Dmid	RANBP2
GNLY	7.28198e-27	0.966326	0.356	0.167	3.29065e-22	C04 - CD8+ CTL : METRNL ADT-NKG2Dmid	GNLY
JUND1	1.64215e-26	0.340176	0.928	0.941	7.42072e-22	C04 - CD8+ CTL : METRNL ADT-NKG2Dmid	JUND
ZNF1651	2.84348e-26	0.498869	0.25	0.095	1.28494e-21	C04 - CD8+ CTL : METRNL ADT-NKG2Dmid	ZNF165
HCST1	3.96875e-26	0.389002	0.892	0.748	1.79344e-21	C04 - CD8+ CTL : METRNL ADT-NKG2Dmid	HCST
ITM2C1	6.79858e-26	0.327308	0.399	0.21	3.07221e-21	C04 - CD8+ CTL : METRNL ADT-NKG2Dmid	ITM2C
NCR3	7.97416e-26	0.479709	0.24	0.089	3.60344e-21	C04 - CD8+ CTL : METRNL ADT-NKG2Dmid	NCR3
ADGRE5	1.00224e-25	0.496674	0.727	0.528	4.52903e-21	C04 - CD8+ CTL : METRNL ADT-NKG2Dmid	ADGRE5
H3F3B1	3.90582e-25	0.291395	1	0.986	1.765e-20	C04 - CD8+ CTL : METRNL ADT-NKG2Dmid	H3F3B
IDI1	5.79928e-25	0.50089	0.651	0.445	2.62064e-20	C04 - CD8+ CTL : METRNL ADT-NKG2Dmid	IDI1
UAP11	9.73136e-25	0.47963	0.349	0.168	4.3975e-20	C04 - CD8+ CTL : METRNL ADT-NKG2Dmid	UAP1
SELK1	3.83992e-24	0.75057	0.499	0.369	1.73522e-19	C04 - CD8+ CTL : METRNL ADT-NKG2Dmid	SELK
NUCB2	4.27875e-24	0.46613	0.363	0.181	1.93352e-19	C04 - CD8+ CTL : METRNL ADT-NKG2Dmid	NUCB2
FAM43A	1.02099e-23	0.513697	0.281	0.123	4.61375e-19	C04 - CD8+ CTL : METRNL ADT-NKG2Dmid	FAM43A
ELL21	1.06147e-23	0.433577	0.419	0.228	4.79666e-19	C04 - CD8+ CTL : METRNL ADT-NKG2Dmid	ELL2
VIM1	1.13675e-23	0.439099	0.978	0.914	5.13686e-19	C04 - CD8+ CTL : METRNL ADT-NKG2Dmid	VIM
TUBB4B1	1.75255e-23	0.421961	0.912	0.784	7.9196e-19	C04 - CD8+ CTL : METRNL ADT-NKG2Dmid	TUBB4B
ANXA13	2.27195e-23	0.289834	0.845	0.658	1.02667e-18	C04 - CD8+ CTL : METRNL ADT-NKG2Dmid	ANXA1
FOSL2	3.10211e-23	0.480474	0.658	0.462	1.40181e-18	C04 - CD8+ CTL : METRNL ADT-NKG2Dmid	FOSL2
ULBP2	3.45745e-23	0.336664	0.195	0.066	1.56239e-18	C04 - CD8+ CTL : METRNL ADT-NKG2Dmid	ULBP2
PIK3R11	4.00973e-23	0.604022	0.584	0.412	1.81196e-18	C04 - CD8+ CTL : METRNL ADT-NKG2Dmid	PIK3R1
PTP4A1	4.77438e-23	0.53608	0.455	0.295	2.1575e-18	C04 - CD8+ CTL : METRNL ADT-NKG2Dmid	PTP4A1
PABPC12	6.92049e-23	0.396159	0.909	0.836	3.1273e-18	C04 - CD8+ CTL : METRNL ADT-NKG2Dmid	PABPC1
CD63	4.19936e-22	0.475622	0.669	0.491	1.89765e-17	C04 - CD8+ CTL : METRNL ADT-NKG2Dmid	CD63
CRTAM1	5.4969e-22	0.383035	0.279	0.132	2.484e-17	C04 - CD8+ CTL : METRNL ADT-NKG2Dmid	CRTAM
SERTAD12	5.9438e-22	0.419049	0.779	0.607	2.68594e-17	C04 - CD8+ CTL : METRNL ADT-NKG2Dmid	SERTAD1
KLRC1	6.54556e-22	0.564473	0.215	0.085	2.95787e-17	C04 - CD8+ CTL : METRNL ADT-NKG2Dmid	KLRC1
LDHA1	8.15959e-22	0.413278	0.874	0.735	3.68724e-17	C04 - CD8+ CTL : METRNL ADT-NKG2Dmid	LDHA
HSPA51	8.16076e-22	0.377279	0.84	0.68	3.68777e-17	C04 - CD8+ CTL : METRNL ADT-NKG2Dmid	HSPA5
RP11-291B21.2	2.1855e-21	0.371936	0.143	0.04	9.87608e-17	C04 - CD8+ CTL : METRNL ADT-NKG2Dmid	RP11-291B21.2
TIPARP1	3.88869e-21	0.474045	0.56	0.366	1.75726e-16	C04 - CD8+ CTL : METRNL ADT-NKG2Dmid	TIPARP
CALM21	4.13463e-21	0.416551	0.892	0.774	1.8684e-16	C04 - CD8+ CTL : METRNL ADT-NKG2Dmid	CALM2
SRSF21	6.17444e-21	0.398611	0.915	0.821	2.79017e-16	C04 - CD8+ CTL : METRNL ADT-NKG2Dmid	SRSF2
DYNLL1	6.93438e-21	0.418111	0.907	0.801	3.13358e-16	C04 - CD8+ CTL : METRNL ADT-NKG2Dmid	DYNLL1
CTSA	7.22641e-21	0.503453	0.458	0.3	3.26554e-16	C04 - CD8+ CTL : METRNL ADT-NKG2Dmid	CTSA
RASGEF1B1	1.00843e-20	0.439247	0.457	0.27	4.55699e-16	C04 - CD8+ CTL : METRNL ADT-NKG2Dmid	RASGEF1B
PPP2R5C1	1.04817e-20	0.404112	0.824	0.679	4.73655e-16	C04 - CD8+ CTL : METRNL ADT-NKG2Dmid	PPP2R5C
SYNGR1	1.49198e-20	0.270208	0.137	0.039	6.7421e-16	C04 - CD8+ CTL : METRNL ADT-NKG2Dmid	SYNGR1
TSC22D3	1.93741e-20	0.435041	0.958	0.904	8.75496e-16	C04 - CD8+ CTL : METRNL ADT-NKG2Dmid	TSC22D3
SLC16A3	2.08259e-20	0.397703	0.311	0.153	9.41099e-16	C04 - CD8+ CTL : METRNL ADT-NKG2Dmid	SLC16A3
IER5L	6.06828e-20	0.465297	0.537	0.347	2.7422e-15	C04 - CD8+ CTL : METRNL ADT-NKG2Dmid	IER5L
ARG2	7.7418e-20	0.438645	0.184	0.067	3.49844e-15	C04 - CD8+ CTL : METRNL ADT-NKG2Dmid	ARG2
SLC25A4	9.59316e-20	0.407777	0.245	0.109	4.33505e-15	C04 - CD8+ CTL : METRNL ADT-NKG2Dmid	SLC25A4
STOM	1.22225e-19	0.318454	0.427	0.251	5.52322e-15	C04 - CD8+ CTL : METRNL ADT-NKG2Dmid	STOM
SYAP1	4.45803e-19	0.49476	0.529	0.357	2.01454e-14	C04 - CD8+ CTL : METRNL ADT-NKG2Dmid	SYAP1
CYCS1	7.31707e-19	0.451555	0.804	0.67	3.30651e-14	C04 - CD8+ CTL : METRNL ADT-NKG2Dmid	CYCS
NR4A21	1.02717e-18	0.272315	0.878	0.726	4.64167e-14	C04 - CD8+ CTL : METRNL ADT-NKG2Dmid	NR4A2
CTH	1.06876e-18	0.291345	0.107	0.026	4.82964e-14	C04 - CD8+ CTL : METRNL ADT-NKG2Dmid	CTH
CEBPB1	1.29598e-18	0.500823	0.545	0.374	5.85639e-14	C04 - CD8+ CTL : METRNL ADT-NKG2Dmid	CEBPB
NR4A31	2.53175e-18	0.412095	0.495	0.315	1.14407e-13	C04 - CD8+ CTL : METRNL ADT-NKG2Dmid	NR4A3
KPNA2	3.05138e-18	0.404742	0.524	0.345	1.37889e-13	C04 - CD8+ CTL : METRNL ADT-NKG2Dmid	KPNA2
CD691	3.41192e-18	0.527533	0.926	0.82	1.54181e-13	C04 - CD8+ CTL : METRNL ADT-NKG2Dmid	CD69
PDCD41	4.34705e-18	0.345261	0.743	0.569	1.96439e-13	C04 - CD8+ CTL : METRNL ADT-NKG2Dmid	PDCD4
RNF1391	5.25027e-18	0.440314	0.443	0.28	2.37254e-13	C04 - CD8+ CTL : METRNL ADT-NKG2Dmid	RNF139
H2AFX	5.35471e-18	0.30561	0.603	0.419	2.41974e-13	C04 - CD8+ CTL : METRNL ADT-NKG2Dmid	H2AFX
DDX5	6.68033e-18	0.302829	0.973	0.957	3.01877e-13	C04 - CD8+ CTL : METRNL ADT-NKG2Dmid	DDX5
ID21	7.3626e-18	0.323205	0.813	0.647	3.32709e-13	C04 - CD8+ CTL : METRNL ADT-NKG2Dmid	ID2
IFITM3	8.17081e-18	0.324983	0.235	0.107	3.69231e-13	C04 - CD8+ CTL : METRNL ADT-NKG2Dmid	IFITM3
GTF2B1	9.60783e-18	0.395524	0.695	0.523	4.34168e-13	C04 - CD8+ CTL : METRNL ADT-NKG2Dmid	GTF2B
H2AFZ	1.63545e-17	0.371601	0.878	0.749	7.39045e-13	C04 - CD8+ CTL : METRNL ADT-NKG2Dmid	H2AFZ
GPR18	9.43471e-17	0.35763	0.182	0.072	4.26345e-12	C04 - CD8+ CTL : METRNL ADT-NKG2Dmid	GPR18
ARL4D	1.72943e-16	0.356806	0.17	0.066	7.81514e-12	C04 - CD8+ CTL : METRNL ADT-NKG2Dmid	ARL4D
HCG18	2.02889e-16	0.42006	0.392	0.238	9.16837e-12	C04 - CD8+ CTL : METRNL ADT-NKG2Dmid	HCG18
SERP11	3.20485e-16	0.335627	0.808	0.664	1.44824e-11	C04 - CD8+ CTL : METRNL ADT-NKG2Dmid	SERP1
MKNK2	4.28403e-16	0.400992	0.548	0.382	1.93591e-11	C04 - CD8+ CTL : METRNL ADT-NKG2Dmid	MKNK2
HSPA81	8.01919e-16	0.403926	0.967	0.924	3.62379e-11	C04 - CD8+ CTL : METRNL ADT-NKG2Dmid	HSPA8
AC092580.4	1.31475e-15	0.266351	0.184	0.08	5.94123e-11	C04 - CD8+ CTL : METRNL ADT-NKG2Dmid	AC092580.4
ALG13	1.40193e-15	0.471549	0.424	0.289	6.33518e-11	C04 - CD8+ CTL : METRNL ADT-NKG2Dmid	ALG13
ZEB21	1.52464e-15	0.268943	0.418	0.265	6.88972e-11	C04 - CD8+ CTL : METRNL ADT-NKG2Dmid	ZEB2
BAIAP2	2.11912e-15	0.31359	0.185	0.078	9.5761e-11	C04 - CD8+ CTL : METRNL ADT-NKG2Dmid	BAIAP2
INSIG11	2.65637e-15	0.41064	0.378	0.232	1.20039e-10	C04 - CD8+ CTL : METRNL ADT-NKG2Dmid	INSIG1
LMNA2	4.08599e-15	0.329674	0.776	0.626	1.84642e-10	C04 - CD8+ CTL : METRNL ADT-NKG2Dmid	LMNA
BCAS21	5.12474e-15	0.430856	0.626	0.477	2.31582e-10	C04 - CD8+ CTL : METRNL ADT-NKG2Dmid	BCAS2
LSR	6.44624e-15	0.294399	0.184	0.078	2.91299e-10	C04 - CD8+ CTL : METRNL ADT-NKG2Dmid	LSR
RUNX31	7.26432e-15	0.375353	0.667	0.513	3.28267e-10	C04 - CD8+ CTL : METRNL ADT-NKG2Dmid	RUNX3
SKIL1	8.68872e-15	0.403571	0.495	0.336	3.92635e-10	C04 - CD8+ CTL : METRNL ADT-NKG2Dmid	SKIL
APBA21	8.75869e-15	0.29105	0.19	0.083	3.95797e-10	C04 - CD8+ CTL : METRNL ADT-NKG2Dmid	APBA2
JUNB	9.62897e-15	0.363692	0.965	0.921	4.35123e-10	C04 - CD8+ CTL : METRNL ADT-NKG2Dmid	JUNB
HIC1	1.03543e-14	0.321404	0.146	0.055	4.67901e-10	C04 - CD8+ CTL : METRNL ADT-NKG2Dmid	HIC1
SLC9A3R1	1.33388e-14	0.286266	0.471	0.312	6.02768e-10	C04 - CD8+ CTL : METRNL ADT-NKG2Dmid	SLC9A3R1
ITPRIP	1.4663e-14	0.269632	0.223	0.107	6.62607e-10	C04 - CD8+ CTL : METRNL ADT-NKG2Dmid	ITPRIP
RNF125	1.76407e-14	0.337916	0.407	0.255	7.97165e-10	C04 - CD8+ CTL : METRNL ADT-NKG2Dmid	RNF125
DDX18	2.13356e-14	0.432316	0.529	0.381	9.64135e-10	C04 - CD8+ CTL : METRNL ADT-NKG2Dmid	DDX18
NASP1	2.25923e-14	0.363788	0.706	0.571	1.02092e-09	C04 - CD8+ CTL : METRNL ADT-NKG2Dmid	NASP
TUBB2A1	2.37057e-14	0.42097	0.414	0.266	1.07124e-09	C04 - CD8+ CTL : METRNL ADT-NKG2Dmid	TUBB2A
OASL1	2.97482e-14	0.312627	0.405	0.255	1.34429e-09	C04 - CD8+ CTL : METRNL ADT-NKG2Dmid	OASL
RRAS2	3.01102e-14	0.272895	0.168	0.07	1.36065e-09	C04 - CD8+ CTL : METRNL ADT-NKG2Dmid	RRAS2
STK17A1	3.48036e-14	0.336038	0.791	0.676	1.57274e-09	C04 - CD8+ CTL : METRNL ADT-NKG2Dmid	STK17A
ARL4A1	3.56342e-14	0.406514	0.534	0.38	1.61027e-09	C04 - CD8+ CTL : METRNL ADT-NKG2Dmid	ARL4A
SLC25A33	3.78434e-14	0.325632	0.228	0.115	1.71011e-09	C04 - CD8+ CTL : METRNL ADT-NKG2Dmid	SLC25A33
SAP181	5.27653e-14	0.351439	0.852	0.748	2.38441e-09	C04 - CD8+ CTL : METRNL ADT-NKG2Dmid	SAP18
LRIF1	5.31709e-14	0.324921	0.283	0.154	2.40274e-09	C04 - CD8+ CTL : METRNL ADT-NKG2Dmid	LRIF1
PARP8	5.62147e-14	0.350167	0.462	0.307	2.54029e-09	C04 - CD8+ CTL : METRNL ADT-NKG2Dmid	PARP8
OAT1	6.15719e-14	0.305023	0.41	0.26	2.78237e-09	C04 - CD8+ CTL : METRNL ADT-NKG2Dmid	OAT
ID1	6.3807e-14	0.478492	0.231	0.115	2.88337e-09	C04 - CD8+ CTL : METRNL ADT-NKG2Dmid	ID1
VPS37B	8.20745e-14	0.378567	0.504	0.355	3.70886e-09	C04 - CD8+ CTL : METRNL ADT-NKG2Dmid	VPS37B
TRG-AS1	1.08908e-13	0.35443	0.224	0.111	4.92144e-09	C04 - CD8+ CTL : METRNL ADT-NKG2Dmid	TRG-AS1
RHOB	1.132e-13	0.306845	0.367	0.226	5.1154e-09	C04 - CD8+ CTL : METRNL ADT-NKG2Dmid	RHOB
CHMP1B1	1.1858e-13	0.455542	0.543	0.409	5.35852e-09	C04 - CD8+ CTL : METRNL ADT-NKG2Dmid	CHMP1B
MOB4	1.30109e-13	0.435714	0.43	0.327	5.8795e-09	C04 - CD8+ CTL : METRNL ADT-NKG2Dmid	MOB4
FTH12	1.60648e-13	0.34903	0.994	0.969	7.25953e-09	C04 - CD8+ CTL : METRNL ADT-NKG2Dmid	FTH1
TUBA1A1	1.77167e-13	0.33594	0.799	0.671	8.00602e-09	C04 - CD8+ CTL : METRNL ADT-NKG2Dmid	TUBA1A
MORF4L2	2.14616e-13	0.387914	0.458	0.326	9.69829e-09	C04 - CD8+ CTL : METRNL ADT-NKG2Dmid	MORF4L2
CSRNP11	8.44148e-13	0.294915	0.642	0.49	3.81462e-08	C04 - CD8+ CTL : METRNL ADT-NKG2Dmid	CSRNP1
SOCS1	8.65434e-13	0.358634	0.708	0.57	3.91081e-08	C04 - CD8+ CTL : METRNL ADT-NKG2Dmid	SOCS1
ARIH1	1.03789e-12	0.356547	0.565	0.425	4.69012e-08	C04 - CD8+ CTL : METRNL ADT-NKG2Dmid	ARIH1
SDCBP2	1.42222e-12	0.256898	0.765	0.622	6.42689e-08	C04 - CD8+ CTL : METRNL ADT-NKG2Dmid	SDCBP
HNRNPAB	2.07092e-12	0.306477	0.619	0.469	9.35829e-08	C04 - CD8+ CTL : METRNL ADT-NKG2Dmid	HNRNPAB
ARF4	2.49808e-12	0.351954	0.579	0.443	1.12886e-07	C04 - CD8+ CTL : METRNL ADT-NKG2Dmid	ARF4
PITPNC1	2.54316e-12	0.286423	0.334	0.204	1.14923e-07	C04 - CD8+ CTL : METRNL ADT-NKG2Dmid	PITPNC1
RARA	2.92849e-12	0.308114	0.283	0.165	1.32335e-07	C04 - CD8+ CTL : METRNL ADT-NKG2Dmid	RARA
SLC25A3	3.23527e-12	0.25989	0.812	0.683	1.46199e-07	C04 - CD8+ CTL : METRNL ADT-NKG2Dmid	SLC25A3
SPRY1	3.30313e-12	0.467712	0.168	0.076	1.49265e-07	C04 - CD8+ CTL : METRNL ADT-NKG2Dmid	SPRY1
ODC12	4.11963e-12	0.437846	0.648	0.521	1.86162e-07	C04 - CD8+ CTL : METRNL ADT-NKG2Dmid	ODC1
ISCA1	4.21884e-12	0.371168	0.402	0.283	1.90645e-07	C04 - CD8+ CTL : METRNL ADT-NKG2Dmid	ISCA1
HSPA2	4.32419e-12	0.289827	0.198	0.097	1.95406e-07	C04 - CD8+ CTL : METRNL ADT-NKG2Dmid	HSPA2
XBP11	7.67147e-12	0.320404	0.567	0.422	3.46666e-07	C04 - CD8+ CTL : METRNL ADT-NKG2Dmid	XBP1
TPST2	9.00328e-12	0.254679	0.331	0.205	4.06849e-07	C04 - CD8+ CTL : METRNL ADT-NKG2Dmid	TPST2
PITHD1	1.02799e-11	0.292166	0.501	0.358	4.64537e-07	C04 - CD8+ CTL : METRNL ADT-NKG2Dmid	PITHD1
ZBTB101	1.10884e-11	0.258268	0.25	0.139	5.01076e-07	C04 - CD8+ CTL : METRNL ADT-NKG2Dmid	ZBTB10
PNP1	1.15757e-11	0.346022	0.458	0.322	5.23096e-07	C04 - CD8+ CTL : METRNL ADT-NKG2Dmid	PNP
PGK1	1.55478e-11	0.340785	0.706	0.587	7.02588e-07	C04 - CD8+ CTL : METRNL ADT-NKG2Dmid	PGK1
PRDX6	1.58838e-11	0.311698	0.515	0.377	7.17775e-07	C04 - CD8+ CTL : METRNL ADT-NKG2Dmid	PRDX6
MAP1LC3B	1.6273e-11	0.319477	0.761	0.64	7.3536e-07	C04 - CD8+ CTL : METRNL ADT-NKG2Dmid	MAP1LC3B
CREM1	2.09737e-11	0.268603	0.845	0.731	9.4778e-07	C04 - CD8+ CTL : METRNL ADT-NKG2Dmid	CREM
ZBTB1	2.1153e-11	0.302784	0.447	0.309	9.55883e-07	C04 - CD8+ CTL : METRNL ADT-NKG2Dmid	ZBTB1
MIDN1	2.46865e-11	0.343591	0.553	0.419	1.11556e-06	C04 - CD8+ CTL : METRNL ADT-NKG2Dmid	MIDN
IFITM2	2.88784e-11	0.320693	0.741	0.631	1.30498e-06	C04 - CD8+ CTL : METRNL ADT-NKG2Dmid	IFITM2
CALR	2.90795e-11	0.257255	0.827	0.711	1.31407e-06	C04 - CD8+ CTL : METRNL ADT-NKG2Dmid	CALR
NFKB11	4.86253e-11	0.385646	0.452	0.329	2.19733e-06	C04 - CD8+ CTL : METRNL ADT-NKG2Dmid	NFKB1
BTG2	5.01212e-11	0.250296	0.771	0.641	2.26492e-06	C04 - CD8+ CTL : METRNL ADT-NKG2Dmid	BTG2
TWISTNB	6.61318e-11	0.410444	0.232	0.145	2.98843e-06	C04 - CD8+ CTL : METRNL ADT-NKG2Dmid	TWISTNB
CTD-3252C9.4	1.02191e-10	0.405874	0.405	0.276	4.61789e-06	C04 - CD8+ CTL : METRNL ADT-NKG2Dmid	CTD-3252C9.4
DNAJB91	1.03126e-10	0.269281	0.52	0.381	4.66014e-06	C04 - CD8+ CTL : METRNL ADT-NKG2Dmid	DNAJB9
PPP1R14B1	1.17738e-10	0.309788	0.425	0.293	5.32044e-06	C04 - CD8+ CTL : METRNL ADT-NKG2Dmid	PPP1R14B
UBE2D1	1.20264e-10	0.273054	0.283	0.169	5.43459e-06	C04 - CD8+ CTL : METRNL ADT-NKG2Dmid	UBE2D1
FABP51	1.40345e-10	0.284363	0.399	0.27	6.34205e-06	C04 - CD8+ CTL : METRNL ADT-NKG2Dmid	FABP5
NPM11	1.60644e-10	0.253031	0.926	0.865	7.25934e-06	C04 - CD8+ CTL : METRNL ADT-NKG2Dmid	NPM1
NFE2L2	1.89715e-10	0.265763	0.59	0.452	8.57303e-06	C04 - CD8+ CTL : METRNL ADT-NKG2Dmid	NFE2L2
SCML4	2.4596e-10	0.255722	0.275	0.166	1.11147e-05	C04 - CD8+ CTL : METRNL ADT-NKG2Dmid	SCML4
SPTSSA	4.15256e-10	0.270801	0.198	0.108	1.8765e-05	C04 - CD8+ CTL : METRNL ADT-NKG2Dmid	SPTSSA
GLA	4.50536e-10	0.390097	0.218	0.129	2.03592e-05	C04 - CD8+ CTL : METRNL ADT-NKG2Dmid	GLA
UBB	5.10268e-10	0.292111	0.961	0.938	2.30585e-05	C04 - CD8+ CTL : METRNL ADT-NKG2Dmid	UBB
GNL3	6.48114e-10	0.314607	0.355	0.243	2.92876e-05	C04 - CD8+ CTL : METRNL ADT-NKG2Dmid	GNL3
HN11	8.21159e-10	0.322743	0.413	0.287	3.71073e-05	C04 - CD8+ CTL : METRNL ADT-NKG2Dmid	HN1
CKS2	1.78888e-09	0.282994	0.584	0.453	8.08375e-05	C04 - CD8+ CTL : METRNL ADT-NKG2Dmid	CKS2
DHX36	2.0581e-09	0.288223	0.56	0.438	9.30037e-05	C04 - CD8+ CTL : METRNL ADT-NKG2Dmid	DHX36
GPCPD1	3.76358e-09	0.300956	0.286	0.193	0.000170072	C04 - CD8+ CTL : METRNL ADT-NKG2Dmid	GPCPD1
AKIRIN1	5.88244e-09	0.255546	0.48	0.356	0.000265822	C04 - CD8+ CTL : METRNL ADT-NKG2Dmid	AKIRIN1
NXT11	6.50921e-09	0.272858	0.327	0.22	0.000294145	C04 - CD8+ CTL : METRNL ADT-NKG2Dmid	NXT1
HSPE1	6.80493e-09	0.431795	0.827	0.759	0.000307508	C04 - CD8+ CTL : METRNL ADT-NKG2Dmid	HSPE1
CCL41	1.19657e-08	0.287238	0.512	0.391	0.000540719	C04 - CD8+ CTL : METRNL ADT-NKG2Dmid	CCL4
IMPDH2	1.3699e-08	0.250617	0.209	0.129	0.000619044	C04 - CD8+ CTL : METRNL ADT-NKG2Dmid	IMPDH2
SLC1A51	1.4375e-08	0.277808	0.312	0.209	0.000649593	C04 - CD8+ CTL : METRNL ADT-NKG2Dmid	SLC1A5
EIF1AX	1.54102e-08	0.279414	0.626	0.517	0.000696372	C04 - CD8+ CTL : METRNL ADT-NKG2Dmid	EIF1AX
TOB1	1.7291e-08	0.407056	0.546	0.457	0.000781364	C04 - CD8+ CTL : METRNL ADT-NKG2Dmid	TOB1
SQSTM1	2.73854e-08	0.292889	0.694	0.594	0.00123752	C04 - CD8+ CTL : METRNL ADT-NKG2Dmid	SQSTM1
PMEPA12	3.20291e-08	0.2504	0.292	0.19	0.00144736	C04 - CD8+ CTL : METRNL ADT-NKG2Dmid	PMEPA1
MRPS6	4.93969e-08	0.366344	0.484	0.386	0.0022322	C04 - CD8+ CTL : METRNL ADT-NKG2Dmid	MRPS6
CEBPD	5.79451e-08	0.354438	0.196	0.115	0.00261848	C04 - CD8+ CTL : METRNL ADT-NKG2Dmid	CEBPD
DNTTIP21	1.2084e-07	0.267063	0.466	0.363	0.00546064	C04 - CD8+ CTL : METRNL ADT-NKG2Dmid	DNTTIP2
DNAJA11	1.28998e-07	0.25343	0.943	0.895	0.00582927	C04 - CD8+ CTL : METRNL ADT-NKG2Dmid	DNAJA1
ATF31	2.94623e-07	0.385974	0.457	0.351	0.0133137	C04 - CD8+ CTL : METRNL ADT-NKG2Dmid	ATF3
CITED21	3.70302e-07	0.273998	0.512	0.402	0.0167336	C04 - CD8+ CTL : METRNL ADT-NKG2Dmid	CITED2
FAM53C1	3.82021e-07	0.267462	0.385	0.287	0.0172631	C04 - CD8+ CTL : METRNL ADT-NKG2Dmid	FAM53C
EGR1	3.90793e-07	0.306048	0.396	0.29	0.0176595	C04 - CD8+ CTL : METRNL ADT-NKG2Dmid	EGR1
TSPYL2	4.30816e-07	0.310355	0.527	0.424	0.0194681	C04 - CD8+ CTL : METRNL ADT-NKG2Dmid	TSPYL2
SPTY2D1	4.31016e-07	0.27487	0.392	0.289	0.0194772	C04 - CD8+ CTL : METRNL ADT-NKG2Dmid	SPTY2D1
FKBP111	4.52336e-07	0.300476	0.281	0.192	0.0204406	C04 - CD8+ CTL : METRNL ADT-NKG2Dmid	FKBP11
SYTL3	4.71843e-07	0.334756	0.414	0.319	0.0213221	C04 - CD8+ CTL : METRNL ADT-NKG2Dmid	SYTL3
CDKN1C	4.74331e-07	0.27329	0.177	0.104	0.0214345	C04 - CD8+ CTL : METRNL ADT-NKG2Dmid	CDKN1C
AL121944.11	4.95392e-07	0.261205	0.151	0.083	0.0223863	C04 - CD8+ CTL : METRNL ADT-NKG2Dmid	AL121944.1
NAF11	1.02314e-06	0.289728	0.243	0.161	0.0462346	C04 - CD8+ CTL : METRNL ADT-NKG2Dmid	NAF1
JMJD61	1.21295e-06	0.271403	0.383	0.295	0.0548119	C04 - CD8+ CTL : METRNL ADT-NKG2Dmid	JMJD6
PTGER42	1.4689e-06	0.277008	0.524	0.423	0.0663782	C04 - CD8+ CTL : METRNL ADT-NKG2Dmid	PTGER4
STAT4	2.79728e-06	0.253246	0.447	0.352	0.126406	C04 - CD8+ CTL : METRNL ADT-NKG2Dmid	STAT4
HSPD1	3.94256e-06	0.379424	0.735	0.667	0.17816	C04 - CD8+ CTL : METRNL ADT-NKG2Dmid	HSPD1
HSPH11	4.00049e-06	0.400655	0.741	0.686	0.180778	C04 - CD8+ CTL : METRNL ADT-NKG2Dmid	HSPH1
ID3	4.83571e-06	0.481666	0.32	0.239	0.218521	C04 - CD8+ CTL : METRNL ADT-NKG2Dmid	ID3
GSPT1	5.34574e-06	0.292934	0.477	0.409	0.241569	C04 - CD8+ CTL : METRNL ADT-NKG2Dmid	GSPT1
TMEM21	2.09746e-05	0.262787	0.309	0.226	0.947821	C04 - CD8+ CTL : METRNL ADT-NKG2Dmid	TMEM2
DNAJA4	0.000786518	0.257321	0.21	0.164	1	C04 - CD8+ CTL : METRNL ADT-NKG2Dmid	DNAJA4
BATF	0	2.2733	0.946	0.296	0	C05 - CD4+ Treg : TNFRSF9 ADT-4.1BB	BATF
FOXP3	0	1.86597	0.736	0.043	0	C05 - CD4+ Treg : TNFRSF9 ADT-4.1BB	FOXP3
TNFRSF18	0.00000000000000000000000000000000000000000000000000000000000000000000000000000000000000000000000000000000000000000000000000000000000000000000000000000000000000000000000000000000000000000000000000000000000000000000000000000000000000000000000000000000000000000000000000000000000000000000000000000000000694993194861762	2.31605	0.891	0.244	0.000000000000000000000000000000000000000000000000000000000000000000000000000000000000000000000000000000000000000000000000000000000000000000000000000000000000000000000000000000000000000000000000000000000000000000000000000000000000000000000000000000000000000000000000000000000000000000000000000000314060474826082	C05 - CD4+ Treg : TNFRSF9 ADT-4.1BB	TNFRSF18
IL2RA	0.0000000000000000000000000000000000000000000000000000000000000000000000000000000000000000000000000000000000000000000000000000000000000000000000000000000000000000000000000000000000000000000000000000000000000000000000000000000000000000000000000000000000000000000000000000000000000000000000000000470080312901277	2.23259	0.689	0.069	0.00000000000000000000000000000000000000000000000000000000000000000000000000000000000000000000000000000000000000000000000000000000000000000000000000000000000000000000000000000000000000000000000000000000000000000000000000000000000000000000000000000000000000000000000000000000000000000000000212424592596958	C05 - CD4+ Treg : TNFRSF9 ADT-4.1BB	IL2RA
TNFRSF4	0.0000000000000000000000000000000000000000000000000000000000000000000000000000000000000000000000000000000000000000000000000000000000000000000000000000000000000000000000000000000000000000000000000000000000000000000000000000000000000000000000000000000000000000000000000000000125554180768187	2.64127	0.807	0.188	0.00000000000000000000000000000000000000000000000000000000000000000000000000000000000000000000000000000000000000000000000000000000000000000000000000000000000000000000000000000000000000000000000000000000000000000000000000000000000000000000000000000000000000000000000000056736678747336	C05 - CD4+ Treg : TNFRSF9 ADT-4.1BB	TNFRSF4
TNFRSF9	0.000000000000000000000000000000000000000000000000000000000000000000000000000000000000000000000000000000000000000000000000000000000000000000000000000000000000000000000000000000000000000000000000000000000000000000000000000000000000000000000000000000000000000000643592565200557	1.8679	0.778	0.132	0.000000000000000000000000000000000000000000000000000000000000000000000000000000000000000000000000000000000000000000000000000000000000000000000000000000000000000000000000000000000000000000000000000000000000000000000000000000000000000000000000000000000000029083304428848	C05 - CD4+ Treg : TNFRSF9 ADT-4.1BB	TNFRSF9
CTLA4	0.000000000000000000000000000000000000000000000000000000000000000000000000000000000000000000000000000000000000000000000000000000000000000000000000000000000000000000000000000000000000000000000000000000000000000000000000000000000000000000000000000000000000000119670646293031	1.87477	0.886	0.228	0.00000000000000000000000000000000000000000000000000000000000000000000000000000000000000000000000000000000000000000000000000000000000000000000000000000000000000000000000000000000000000000000000000000000000000000000000000000000000000000000000000000000000540779683533578	C05 - CD4+ Treg : TNFRSF9 ADT-4.1BB	CTLA4
IL32	0.0000000000000000000000000000000000000000000000000000000000000000000000000000000000000000000000000000000000000000000000000000000000000000000000000000000000000000000000000000000000000000000000000000000000000000000000000000000000000000000000000000000000000355470321326064	1.51433	0.988	0.853	0.00000000000000000000000000000000000000000000000000000000000000000000000000000000000000000000000000000000000000000000000000000000000000000000000000000000000000000000000000000000000000000000000000000000000000000000000000000000000000000000000000000000160633483504035	C05 - CD4+ Treg : TNFRSF9 ADT-4.1BB	IL32
TIGIT	0.0000000000000000000000000000000000000000000000000000000000000000000000000000000000000000000000000000000000000000000000000000000000000000000000000000000000000000000000000000000000000000000000000000000000000000000000000000000000000000000000000000000000244370184831004	1.78106	0.908	0.291	0.00000000000000000000000000000000000000000000000000000000000000000000000000000000000000000000000000000000000000000000000000000000000000000000000000000000000000000000000000000000000000000000000000000000000000000000000000000000000000000000000000000110428442823282	C05 - CD4+ Treg : TNFRSF9 ADT-4.1BB	TIGIT
LAYN	0.0000000000000000000000000000000000000000000000000000000000000000000000000000000000000000000000000000000000000000000000000000000000000000000000000000000000000000000000000000000000000000000000000000000000000000000000000000000000000000000000000000000674811873472079	1.5022	0.563	0.039	0.00000000000000000000000000000000000000000000000000000000000000000000000000000000000000000000000000000000000000000000000000000000000000000000000000000000000000000000000000000000000000000000000000000000000000000000000000000000000000000000000000304940737503298	C05 - CD4+ Treg : TNFRSF9 ADT-4.1BB	LAYN
CARD16	2.16588e-232	1.60371	0.853	0.299	9.78738e-228	C05 - CD4+ Treg : TNFRSF9 ADT-4.1BB	CARD16
IL1R2	1.0264e-205	1.17626	0.392	0.012	4.63819e-201	C05 - CD4+ Treg : TNFRSF9 ADT-4.1BB	IL1R2
CD27	1.57762e-195	1.50598	0.853	0.319	7.1291e-191	C05 - CD4+ Treg : TNFRSF9 ADT-4.1BB	CD27
GK	4.50884e-195	1.62903	0.633	0.101	2.0375e-190	C05 - CD4+ Treg : TNFRSF9 ADT-4.1BB	GK
DNPH1	4.56709e-191	1.38626	0.779	0.231	2.06382e-186	C05 - CD4+ Treg : TNFRSF9 ADT-4.1BB	DNPH1
LAIR2	1.66204e-184	1.4449	0.527	0.061	7.51058e-180	C05 - CD4+ Treg : TNFRSF9 ADT-4.1BB	LAIR2
TBC1D4	2.82871e-182	1.34728	0.69	0.144	1.27826e-177	C05 - CD4+ Treg : TNFRSF9 ADT-4.1BB	TBC1D4
PMAIP1	1.40212e-180	1.59079	0.876	0.421	6.33604e-176	C05 - CD4+ Treg : TNFRSF9 ADT-4.1BB	PMAIP1
IKZF2	7.44194e-179	1.16906	0.603	0.096	3.36294e-174	C05 - CD4+ Treg : TNFRSF9 ADT-4.1BB	IKZF2
RTKN2	4.36946e-178	1.3788	0.542	0.069	1.97452e-173	C05 - CD4+ Treg : TNFRSF9 ADT-4.1BB	RTKN2
S100A41	3.54128e-175	1.32385	0.987	0.86	1.60027e-170	C05 - CD4+ Treg : TNFRSF9 ADT-4.1BB	S100A4
HTATIP2	1.18243e-169	1.34069	0.628	0.135	5.3433e-165	C05 - CD4+ Treg : TNFRSF9 ADT-4.1BB	HTATIP2
LAPTM4B	3.68354e-164	0.967613	0.418	0.034	1.66456e-159	C05 - CD4+ Treg : TNFRSF9 ADT-4.1BB	LAPTM4B
TYMP	9.46387e-164	1.50941	0.82	0.382	4.27663e-159	C05 - CD4+ Treg : TNFRSF9 ADT-4.1BB	TYMP
GADD45A	2.67934e-162	1.71718	0.794	0.357	1.21077e-157	C05 - CD4+ Treg : TNFRSF9 ADT-4.1BB	GADD45A
LTB1	6.52171e-162	1.61747	0.946	0.638	2.94709e-157	C05 - CD4+ Treg : TNFRSF9 ADT-4.1BB	LTB
CRADD	3.31955e-157	1.11561	0.428	0.04	1.50007e-152	C05 - CD4+ Treg : TNFRSF9 ADT-4.1BB	CRADD
ICOS	2.83592e-151	1.47688	0.848	0.388	1.28152e-146	C05 - CD4+ Treg : TNFRSF9 ADT-4.1BB	ICOS
CTSC	1.28483e-148	1.38173	0.829	0.426	5.80601e-144	C05 - CD4+ Treg : TNFRSF9 ADT-4.1BB	CTSC
MAGEH1	2.06216e-146	1.55333	0.461	0.066	9.3187e-142	C05 - CD4+ Treg : TNFRSF9 ADT-4.1BB	MAGEH1
STAM	7.34702e-145	1.09226	0.582	0.118	3.32005e-140	C05 - CD4+ Treg : TNFRSF9 ADT-4.1BB	STAM
AC133644.2	1.68464e-143	1.27316	0.484	0.071	7.61273e-139	C05 - CD4+ Treg : TNFRSF9 ADT-4.1BB	AC133644.2
FANK1	7.36803e-131	0.78796	0.3	0.016	3.32954e-126	C05 - CD4+ Treg : TNFRSF9 ADT-4.1BB	FANK1
GCNT1	1.39537e-129	0.980956	0.397	0.046	6.30554e-125	C05 - CD4+ Treg : TNFRSF9 ADT-4.1BB	GCNT1
HLA-A	3.57401e-129	0.76495	1	0.987	1.61506e-124	C05 - CD4+ Treg : TNFRSF9 ADT-4.1BB	HLA-A
GLRX	9.20185e-128	1.26072	0.705	0.261	4.15823e-123	C05 - CD4+ Treg : TNFRSF9 ADT-4.1BB	GLRX
NAMPT	1.94277e-124	1.29643	0.797	0.401	8.77916e-120	C05 - CD4+ Treg : TNFRSF9 ADT-4.1BB	NAMPT
PARK7	5.14638e-124	1.05671	0.885	0.533	2.3256e-119	C05 - CD4+ Treg : TNFRSF9 ADT-4.1BB	PARK7
TNFRSF1B	2.23873e-121	1.16321	0.789	0.371	1.01166e-116	C05 - CD4+ Treg : TNFRSF9 ADT-4.1BB	TNFRSF1B
ENO1	3.61129e-120	1.12206	0.875	0.546	1.63191e-115	C05 - CD4+ Treg : TNFRSF9 ADT-4.1BB	ENO1
SAT1	6.8805e-119	1.31788	0.941	0.773	3.10923e-114	C05 - CD4+ Treg : TNFRSF9 ADT-4.1BB	SAT1
ARID5B	7.14584e-118	1.19718	0.898	0.525	3.22914e-113	C05 - CD4+ Treg : TNFRSF9 ADT-4.1BB	ARID5B
CCR8	2.2327e-117	0.594317	0.249	0.01	1.00893e-112	C05 - CD4+ Treg : TNFRSF9 ADT-4.1BB	CCR8
MIR4435-2HG	3.5856e-117	1.18924	0.595	0.163	1.6203e-112	C05 - CD4+ Treg : TNFRSF9 ADT-4.1BB	MIR4435-2HG
BACH1	1.12523e-116	1.08467	0.593	0.167	5.08479e-112	C05 - CD4+ Treg : TNFRSF9 ADT-4.1BB	BACH1
DUSP4	1.77581e-112	1.16227	0.921	0.551	8.0247e-108	C05 - CD4+ Treg : TNFRSF9 ADT-4.1BB	DUSP4
PKM	2.59218e-111	1.26187	0.758	0.401	1.17138e-106	C05 - CD4+ Treg : TNFRSF9 ADT-4.1BB	PKM
CUL9	2.18619e-106	0.801499	0.343	0.041	9.87918e-102	C05 - CD4+ Treg : TNFRSF9 ADT-4.1BB	CUL9
CD177	2.86724e-105	1.10663	0.214	0.007	1.29568e-100	C05 - CD4+ Treg : TNFRSF9 ADT-4.1BB	CD177
PHLDA1	1.48204e-104	1.0672	0.85	0.438	6.6972e-100	C05 - CD4+ Treg : TNFRSF9 ADT-4.1BB	PHLDA1
GAPDH	2.42011e-104	0.926002	0.99	0.898	1.09362e-99	C05 - CD4+ Treg : TNFRSF9 ADT-4.1BB	GAPDH
SNX9	2.8285e-104	0.992082	0.623	0.197	1.27817e-99	C05 - CD4+ Treg : TNFRSF9 ADT-4.1BB	SNX9
TRAC	5.10593e-104	0.929719	0.975	0.792	2.30732e-99	C05 - CD4+ Treg : TNFRSF9 ADT-4.1BB	TRAC
F5	9.48857e-101	0.667087	0.301	0.03	4.28779e-96	C05 - CD4+ Treg : TNFRSF9 ADT-4.1BB	F5
PELI1	4.06182e-99	0.949348	0.547	0.154	1.8355e-94	C05 - CD4+ Treg : TNFRSF9 ADT-4.1BB	PELI1
ARPC1B	7.36991e-99	0.941257	0.868	0.58	3.33039e-94	C05 - CD4+ Treg : TNFRSF9 ADT-4.1BB	ARPC1B
ZC3H12D	1.10292e-98	0.969488	0.596	0.187	4.98397e-94	C05 - CD4+ Treg : TNFRSF9 ADT-4.1BB	ZC3H12D
ENTPD1	2.28444e-98	0.881806	0.387	0.065	1.03232e-93	C05 - CD4+ Treg : TNFRSF9 ADT-4.1BB	ENTPD1
SPOCK2	2.72771e-98	0.955184	0.862	0.522	1.23262e-93	C05 - CD4+ Treg : TNFRSF9 ADT-4.1BB	SPOCK2
DUSP16	8.64705e-98	0.918076	0.567	0.168	3.90752e-93	C05 - CD4+ Treg : TNFRSF9 ADT-4.1BB	DUSP16
ATP13A3	4.3476e-97	0.958896	0.442	0.099	1.96464e-92	C05 - CD4+ Treg : TNFRSF9 ADT-4.1BB	ATP13A3
AC145110.1	1.05233e-95	0.688759	0.222	0.012	4.75538e-91	C05 - CD4+ Treg : TNFRSF9 ADT-4.1BB	AC145110.1
CD79B	2.73169e-95	0.759233	0.428	0.088	1.23442e-90	C05 - CD4+ Treg : TNFRSF9 ADT-4.1BB	CD79B
CORO1B	4.47086e-95	1.13002	0.697	0.301	2.02034e-90	C05 - CD4+ Treg : TNFRSF9 ADT-4.1BB	CORO1B
IL1R1	5.36558e-95	0.550068	0.231	0.014	2.42465e-90	C05 - CD4+ Treg : TNFRSF9 ADT-4.1BB	IL1R1
PHACTR2	1.43808e-93	0.932118	0.619	0.217	6.49853e-89	C05 - CD4+ Treg : TNFRSF9 ADT-4.1BB	PHACTR2
GBP2	4.30588e-92	1.00047	0.763	0.381	1.94578e-87	C05 - CD4+ Treg : TNFRSF9 ADT-4.1BB	GBP2
SOD1	1.34965e-89	0.836717	0.949	0.743	6.09893e-85	C05 - CD4+ Treg : TNFRSF9 ADT-4.1BB	SOD1
MAF	3.58422e-87	0.837526	0.654	0.25	1.61968e-82	C05 - CD4+ Treg : TNFRSF9 ADT-4.1BB	MAF
SUMO2	5.57286e-87	0.747576	0.934	0.709	2.51832e-82	C05 - CD4+ Treg : TNFRSF9 ADT-4.1BB	SUMO2
GNG8	1.10772e-84	0.502834	0.176	0.006	5.00569e-80	C05 - CD4+ Treg : TNFRSF9 ADT-4.1BB	GNG8
HLA-DRB11	1.80578e-84	1.07947	0.862	0.5	8.16013e-80	C05 - CD4+ Treg : TNFRSF9 ADT-4.1BB	HLA-DRB1
HLA-DQA11	5.08818e-84	1.17112	0.628	0.244	2.2993e-79	C05 - CD4+ Treg : TNFRSF9 ADT-4.1BB	HLA-DQA1
MAST4	8.29856e-84	0.785971	0.394	0.083	3.75004e-79	C05 - CD4+ Treg : TNFRSF9 ADT-4.1BB	MAST4
UGP2	6.53598e-83	1.03627	0.671	0.303	2.95354e-78	C05 - CD4+ Treg : TNFRSF9 ADT-4.1BB	UGP2
PRDM2	5.58817e-82	0.978253	0.707	0.37	2.52524e-77	C05 - CD4+ Treg : TNFRSF9 ADT-4.1BB	PRDM2
LINC01943	1.10387e-81	1.20487	0.277	0.039	4.9883e-77	C05 - CD4+ Treg : TNFRSF9 ADT-4.1BB	LINC01943
CACYBP	8.6022e-81	1.14425	0.769	0.472	3.88725e-76	C05 - CD4+ Treg : TNFRSF9 ADT-4.1BB	CACYBP
ZBTB38	1.04423e-80	0.882864	0.56	0.191	4.71876e-76	C05 - CD4+ Treg : TNFRSF9 ADT-4.1BB	ZBTB38
PPM1G	4.56767e-80	0.788479	0.661	0.274	2.06409e-75	C05 - CD4+ Treg : TNFRSF9 ADT-4.1BB	PPM1G
OAZ1	1.39829e-79	0.624095	0.985	0.912	6.31874e-75	C05 - CD4+ Treg : TNFRSF9 ADT-4.1BB	OAZ1
CXCR6	2.37547e-79	0.782805	0.443	0.118	1.07345e-74	C05 - CD4+ Treg : TNFRSF9 ADT-4.1BB	CXCR6
SYNGR2	1.40118e-78	0.85639	0.425	0.113	6.33177e-74	C05 - CD4+ Treg : TNFRSF9 ADT-4.1BB	SYNGR2
PHTF2	6.66034e-78	0.68385	0.517	0.166	3.00974e-73	C05 - CD4+ Treg : TNFRSF9 ADT-4.1BB	PHTF2
ACP5	8.47093e-78	0.791725	0.427	0.11	3.82793e-73	C05 - CD4+ Treg : TNFRSF9 ADT-4.1BB	ACP5
IL2RG	1.28821e-77	0.821295	0.858	0.594	5.8213e-73	C05 - CD4+ Treg : TNFRSF9 ADT-4.1BB	IL2RG
BTG3	3.96212e-77	0.927421	0.717	0.348	1.79044e-72	C05 - CD4+ Treg : TNFRSF9 ADT-4.1BB	BTG3
AC017002.1	4.91712e-77	0.528298	0.201	0.014	2.222e-72	C05 - CD4+ Treg : TNFRSF9 ADT-4.1BB	AC017002.1
CALM3	2.68827e-76	0.800993	0.776	0.405	1.2148e-71	C05 - CD4+ Treg : TNFRSF9 ADT-4.1BB	CALM3
AKIRIN2	4.50081e-76	0.880627	0.638	0.271	2.03387e-71	C05 - CD4+ Treg : TNFRSF9 ADT-4.1BB	AKIRIN2
AC017002.3	1.67388e-74	0.679879	0.175	0.009	7.56408e-70	C05 - CD4+ Treg : TNFRSF9 ADT-4.1BB	AC017002.3
GBP5	8.62361e-74	0.914221	0.652	0.291	3.89692e-69	C05 - CD4+ Treg : TNFRSF9 ADT-4.1BB	GBP5
RAB11FIP1	3.04389e-73	0.911771	0.672	0.305	1.3755e-68	C05 - CD4+ Treg : TNFRSF9 ADT-4.1BB	RAB11FIP1
ZBTB32	4.59275e-73	0.492102	0.204	0.017	2.07542e-68	C05 - CD4+ Treg : TNFRSF9 ADT-4.1BB	ZBTB32
APLP2	1.2809e-72	0.890638	0.557	0.216	5.78827e-68	C05 - CD4+ Treg : TNFRSF9 ADT-4.1BB	APLP2
CNIH1	3.3556e-72	0.869197	0.498	0.177	1.51636e-67	C05 - CD4+ Treg : TNFRSF9 ADT-4.1BB	CNIH1
SEC14L1	7.55389e-72	0.810807	0.468	0.147	3.41353e-67	C05 - CD4+ Treg : TNFRSF9 ADT-4.1BB	SEC14L1
B2M	1.06398e-71	0.43847	1	0.999	4.80801e-67	C05 - CD4+ Treg : TNFRSF9 ADT-4.1BB	B2M
GEM	7.1186e-71	1.00597	0.445	0.129	3.21682e-66	C05 - CD4+ Treg : TNFRSF9 ADT-4.1BB	GEM
STAT3	1.58586e-70	0.810881	0.86	0.582	7.16634e-66	C05 - CD4+ Treg : TNFRSF9 ADT-4.1BB	STAT3
MYL6	2.33825e-70	0.673544	0.979	0.869	1.05663e-65	C05 - CD4+ Treg : TNFRSF9 ADT-4.1BB	MYL6
IKZF4	2.23761e-69	0.56747	0.262	0.039	1.01115e-64	C05 - CD4+ Treg : TNFRSF9 ADT-4.1BB	IKZF4
PRDM1	5.59055e-69	0.81757	0.634	0.273	2.52631e-64	C05 - CD4+ Treg : TNFRSF9 ADT-4.1BB	PRDM1
RPS27L	1.53897e-68	0.900547	0.758	0.421	6.95444e-64	C05 - CD4+ Treg : TNFRSF9 ADT-4.1BB	RPS27L
EBI3	1.06512e-67	0.527268	0.196	0.017	4.81317e-63	C05 - CD4+ Treg : TNFRSF9 ADT-4.1BB	EBI3
CD741	2.23583e-67	0.795852	0.932	0.689	1.01035e-62	C05 - CD4+ Treg : TNFRSF9 ADT-4.1BB	CD74
PGAM1	2.95149e-67	0.809117	0.712	0.369	1.33375e-62	C05 - CD4+ Treg : TNFRSF9 ADT-4.1BB	PGAM1
UCP2	4.64804e-67	0.803361	0.69	0.339	2.1004e-62	C05 - CD4+ Treg : TNFRSF9 ADT-4.1BB	UCP2
HACD1	9.44519e-67	0.462741	0.229	0.029	4.26819e-62	C05 - CD4+ Treg : TNFRSF9 ADT-4.1BB	HACD1
RHBDD2	1.05679e-66	0.787878	0.506	0.185	4.77552e-62	C05 - CD4+ Treg : TNFRSF9 ADT-4.1BB	RHBDD2
TRAF3	4.01813e-66	0.704383	0.435	0.131	1.81575e-61	C05 - CD4+ Treg : TNFRSF9 ADT-4.1BB	TRAF3
NCF4	1.2801e-65	0.548784	0.364	0.093	5.78464e-61	C05 - CD4+ Treg : TNFRSF9 ADT-4.1BB	NCF4
TOX2	1.48678e-65	0.488518	0.297	0.059	6.7186e-61	C05 - CD4+ Treg : TNFRSF9 ADT-4.1BB	TOX2
ZNF292	1.67881e-65	0.851351	0.662	0.32	7.58639e-61	C05 - CD4+ Treg : TNFRSF9 ADT-4.1BB	ZNF292
PFN1	3.03526e-65	0.689303	0.974	0.869	1.37161e-60	C05 - CD4+ Treg : TNFRSF9 ADT-4.1BB	PFN1
COX5B	9.27441e-65	0.655562	0.827	0.493	4.19101e-60	C05 - CD4+ Treg : TNFRSF9 ADT-4.1BB	COX5B
MALT1	1.07709e-64	0.827792	0.514	0.198	4.86724e-60	C05 - CD4+ Treg : TNFRSF9 ADT-4.1BB	MALT1
CTSZ	1.57534e-64	0.698447	0.532	0.202	7.11882e-60	C05 - CD4+ Treg : TNFRSF9 ADT-4.1BB	CTSZ
KCNN4	1.5901e-64	0.553588	0.252	0.039	7.1855e-60	C05 - CD4+ Treg : TNFRSF9 ADT-4.1BB	KCNN4
SEC11C	5.83616e-64	0.760671	0.641	0.301	2.6373e-59	C05 - CD4+ Treg : TNFRSF9 ADT-4.1BB	SEC11C
CCNG2	7.13685e-64	0.5677	0.341	0.082	3.22507e-59	C05 - CD4+ Treg : TNFRSF9 ADT-4.1BB	CCNG2
STK17B	1.20011e-63	0.710726	0.898	0.668	5.42317e-59	C05 - CD4+ Treg : TNFRSF9 ADT-4.1BB	STK17B
CD80	1.67061e-63	0.43713	0.181	0.015	7.54932e-59	C05 - CD4+ Treg : TNFRSF9 ADT-4.1BB	CD80
MAP1LC3A	1.84945e-63	0.753454	0.418	0.126	8.35749e-59	C05 - CD4+ Treg : TNFRSF9 ADT-4.1BB	MAP1LC3A
TNFRSF13B	2.97224e-63	0.41709	0.15	0.008	1.34313e-58	C05 - CD4+ Treg : TNFRSF9 ADT-4.1BB	TNFRSF13B
COL9A2	3.49062e-63	0.455456	0.27	0.049	1.57738e-58	C05 - CD4+ Treg : TNFRSF9 ADT-4.1BB	COL9A2
ID31	4.16531e-63	1.17717	0.539	0.22	1.88226e-58	C05 - CD4+ Treg : TNFRSF9 ADT-4.1BB	ID3
CD4	4.19225e-63	0.640583	0.494	0.178	1.89444e-58	C05 - CD4+ Treg : TNFRSF9 ADT-4.1BB	CD4
NOP10	4.24256e-63	0.709533	0.671	0.322	1.91717e-58	C05 - CD4+ Treg : TNFRSF9 ADT-4.1BB	NOP10
FKBP1A	1.57715e-62	0.750443	0.708	0.373	7.12698e-58	C05 - CD4+ Treg : TNFRSF9 ADT-4.1BB	FKBP1A
MSI2	1.81972e-62	0.649193	0.555	0.222	8.22314e-58	C05 - CD4+ Treg : TNFRSF9 ADT-4.1BB	MSI2
ATOX1	1.86402e-62	0.736329	0.46	0.155	8.42332e-58	C05 - CD4+ Treg : TNFRSF9 ADT-4.1BB	ATOX1
FAS	1.88732e-62	0.77467	0.509	0.191	8.52863e-58	C05 - CD4+ Treg : TNFRSF9 ADT-4.1BB	FAS
VDR	2.24985e-62	0.509707	0.255	0.042	1.01669e-57	C05 - CD4+ Treg : TNFRSF9 ADT-4.1BB	VDR
CCND2	2.95403e-62	0.822843	0.659	0.329	1.3349e-57	C05 - CD4+ Treg : TNFRSF9 ADT-4.1BB	CCND2
CD71	5.06553e-62	0.833443	0.858	0.562	2.28906e-57	C05 - CD4+ Treg : TNFRSF9 ADT-4.1BB	CD7
INPP5F	1.43021e-61	0.531609	0.283	0.055	6.46296e-57	C05 - CD4+ Treg : TNFRSF9 ADT-4.1BB	INPP5F
ICA1	3.02246e-61	0.726849	0.28	0.054	1.36582e-56	C05 - CD4+ Treg : TNFRSF9 ADT-4.1BB	ICA1
PTPRJ	4.18883e-61	0.570787	0.4	0.119	1.89289e-56	C05 - CD4+ Treg : TNFRSF9 ADT-4.1BB	PTPRJ
CD2	6.75055e-61	0.645732	0.959	0.811	3.0505e-56	C05 - CD4+ Treg : TNFRSF9 ADT-4.1BB	CD2
CYTIP	8.44134e-61	0.754722	0.914	0.726	3.81455e-56	C05 - CD4+ Treg : TNFRSF9 ADT-4.1BB	CYTIP
SELL	9.79553e-61	0.607924	0.504	0.193	4.4265e-56	C05 - CD4+ Treg : TNFRSF9 ADT-4.1BB	SELL
ADAT2	1.25721e-60	0.435079	0.236	0.037	5.68123e-56	C05 - CD4+ Treg : TNFRSF9 ADT-4.1BB	ADAT2
ETV7	1.98066e-60	0.593648	0.303	0.065	8.95039e-56	C05 - CD4+ Treg : TNFRSF9 ADT-4.1BB	ETV7
ZC2HC1A	2.08901e-60	0.627124	0.255	0.044	9.44002e-56	C05 - CD4+ Treg : TNFRSF9 ADT-4.1BB	ZC2HC1A
SOX4	3.64861e-60	1.16514	0.293	0.062	1.64877e-55	C05 - CD4+ Treg : TNFRSF9 ADT-4.1BB	SOX4
SERPINB9	3.9568e-60	0.773951	0.659	0.323	1.78804e-55	C05 - CD4+ Treg : TNFRSF9 ADT-4.1BB	SERPINB9
CCR61	5.78219e-60	0.836361	0.371	0.102	2.61292e-55	C05 - CD4+ Treg : TNFRSF9 ADT-4.1BB	CCR6
ACOT9	7.29328e-60	0.580016	0.344	0.087	3.29576e-55	C05 - CD4+ Treg : TNFRSF9 ADT-4.1BB	ACOT9
USP12	1.29406e-59	0.682592	0.438	0.145	5.84775e-55	C05 - CD4+ Treg : TNFRSF9 ADT-4.1BB	USP12
RHOC	2.75999e-59	0.648912	0.562	0.235	1.24721e-54	C05 - CD4+ Treg : TNFRSF9 ADT-4.1BB	RHOC
NOP58	4.33059e-59	0.803113	0.692	0.383	1.95695e-54	C05 - CD4+ Treg : TNFRSF9 ADT-4.1BB	NOP58
CREB3L2	5.55778e-59	0.599719	0.353	0.093	2.5115e-54	C05 - CD4+ Treg : TNFRSF9 ADT-4.1BB	CREB3L2
ACSL4	7.0349e-59	0.639295	0.346	0.09	3.179e-54	C05 - CD4+ Treg : TNFRSF9 ADT-4.1BB	ACSL4
COX8A	8.70632e-59	0.606079	0.87	0.571	3.9343e-54	C05 - CD4+ Treg : TNFRSF9 ADT-4.1BB	COX8A
TXN	9.19979e-59	0.70875	0.802	0.491	4.15729e-54	C05 - CD4+ Treg : TNFRSF9 ADT-4.1BB	TXN
UBC	4.94674e-58	0.647962	0.99	0.969	2.23538e-53	C05 - CD4+ Treg : TNFRSF9 ADT-4.1BB	UBC
SAMSN1	1.13278e-57	0.906229	0.862	0.624	5.1189e-53	C05 - CD4+ Treg : TNFRSF9 ADT-4.1BB	SAMSN1
TANK	1.34461e-57	0.843216	0.769	0.461	6.07617e-53	C05 - CD4+ Treg : TNFRSF9 ADT-4.1BB	TANK
IL18R1	1.83883e-57	0.453467	0.285	0.063	8.30949e-53	C05 - CD4+ Treg : TNFRSF9 ADT-4.1BB	IL18R1
NAB1	1.89501e-57	0.575756	0.369	0.107	8.56334e-53	C05 - CD4+ Treg : TNFRSF9 ADT-4.1BB	NAB1
LGALS1	3.35184e-57	1.13546	0.727	0.434	1.51466e-52	C05 - CD4+ Treg : TNFRSF9 ADT-4.1BB	LGALS1
CHMP2A	9.8752e-57	0.630196	0.598	0.272	4.4625e-52	C05 - CD4+ Treg : TNFRSF9 ADT-4.1BB	CHMP2A
SH2D2A	1.05403e-56	0.714709	0.585	0.265	4.76304e-52	C05 - CD4+ Treg : TNFRSF9 ADT-4.1BB	SH2D2A
SIRPG	1.16643e-56	0.616292	0.41	0.132	5.27098e-52	C05 - CD4+ Treg : TNFRSF9 ADT-4.1BB	SIRPG
PTTG1	1.64597e-56	0.573631	0.532	0.221	7.43799e-52	C05 - CD4+ Treg : TNFRSF9 ADT-4.1BB	PTTG1
LTA	3.2584e-56	0.528145	0.254	0.047	1.47244e-51	C05 - CD4+ Treg : TNFRSF9 ADT-4.1BB	LTA
CTTNBP2NL	4.86043e-56	0.366634	0.178	0.019	2.19638e-51	C05 - CD4+ Treg : TNFRSF9 ADT-4.1BB	CTTNBP2NL
ARHGEF12	1.16648e-55	0.441153	0.262	0.055	5.27122e-51	C05 - CD4+ Treg : TNFRSF9 ADT-4.1BB	ARHGEF12
POU2F2	1.22277e-55	0.605585	0.366	0.107	5.52558e-51	C05 - CD4+ Treg : TNFRSF9 ADT-4.1BB	POU2F2
ZC3H7A	1.22546e-55	0.58792	0.443	0.156	5.53772e-51	C05 - CD4+ Treg : TNFRSF9 ADT-4.1BB	ZC3H7A
RGS1	3.80191e-55	0.59969	0.924	0.654	1.71805e-50	C05 - CD4+ Treg : TNFRSF9 ADT-4.1BB	RGS1
CASP1	4.85662e-55	0.61728	0.514	0.208	2.19466e-50	C05 - CD4+ Treg : TNFRSF9 ADT-4.1BB	CASP1
SFT2D1	9.28425e-55	0.617865	0.55	0.237	4.19546e-50	C05 - CD4+ Treg : TNFRSF9 ADT-4.1BB	SFT2D1
SRP14	1.48539e-54	0.556525	0.944	0.794	6.71231e-50	C05 - CD4+ Treg : TNFRSF9 ADT-4.1BB	SRP14
JAK1	3.48546e-54	0.688432	0.789	0.509	1.57505e-49	C05 - CD4+ Treg : TNFRSF9 ADT-4.1BB	JAK1
ISOC1	5.02085e-54	0.563585	0.349	0.099	2.26887e-49	C05 - CD4+ Treg : TNFRSF9 ADT-4.1BB	ISOC1
2003-03-01	7.51645e-54	0.423574	0.234	0.042	3.39661e-49	C05 - CD4+ Treg : TNFRSF9 ADT-4.1BB	2003-03-01
LINC02099	9.4609e-54	0.51993	0.119	0.005	4.27529e-49	C05 - CD4+ Treg : TNFRSF9 ADT-4.1BB	LINC02099
UBE2B	1.32382e-53	0.754296	0.738	0.466	5.98222e-49	C05 - CD4+ Treg : TNFRSF9 ADT-4.1BB	UBE2B
PBXIP1	2.83529e-53	0.697887	0.675	0.359	1.28124e-48	C05 - CD4+ Treg : TNFRSF9 ADT-4.1BB	PBXIP1
LGALS3	5.27291e-53	0.635339	0.608	0.29	2.38277e-48	C05 - CD4+ Treg : TNFRSF9 ADT-4.1BB	LGALS3
SMAP2	5.77006e-53	0.723876	0.735	0.437	2.60743e-48	C05 - CD4+ Treg : TNFRSF9 ADT-4.1BB	SMAP2
LMCD1	6.46687e-53	0.437147	0.221	0.037	2.92232e-48	C05 - CD4+ Treg : TNFRSF9 ADT-4.1BB	LMCD1
ARL6IP5	1.32056e-52	0.646067	0.876	0.627	5.96748e-48	C05 - CD4+ Treg : TNFRSF9 ADT-4.1BB	ARL6IP5
HPGD	1.40555e-52	0.809473	0.244	0.048	6.35156e-48	C05 - CD4+ Treg : TNFRSF9 ADT-4.1BB	HPGD
SERPINE2	1.73965e-52	0.430904	0.224	0.04	7.8613e-48	C05 - CD4+ Treg : TNFRSF9 ADT-4.1BB	SERPINE2
PSMB6	2.14482e-52	0.567471	0.638	0.318	9.69223e-48	C05 - CD4+ Treg : TNFRSF9 ADT-4.1BB	PSMB6
NPTN	3.27849e-52	0.510496	0.348	0.101	1.48152e-47	C05 - CD4+ Treg : TNFRSF9 ADT-4.1BB	NPTN
HLA-DPA11	3.67203e-52	0.642834	0.822	0.514	1.65935e-47	C05 - CD4+ Treg : TNFRSF9 ADT-4.1BB	HLA-DPA1
RAC1	3.7254e-52	0.615592	0.743	0.432	1.68347e-47	C05 - CD4+ Treg : TNFRSF9 ADT-4.1BB	RAC1
ZNRF2	4.22576e-52	0.569409	0.437	0.158	1.90958e-47	C05 - CD4+ Treg : TNFRSF9 ADT-4.1BB	ZNRF2
COX5A	4.25384e-52	0.680695	0.677	0.371	1.92227e-47	C05 - CD4+ Treg : TNFRSF9 ADT-4.1BB	COX5A
YWHAB	4.47095e-52	0.642734	0.853	0.611	2.02038e-47	C05 - CD4+ Treg : TNFRSF9 ADT-4.1BB	YWHAB
NCOA3	6.14795e-52	0.591654	0.451	0.169	2.77819e-47	C05 - CD4+ Treg : TNFRSF9 ADT-4.1BB	NCOA3
CAST	6.30982e-52	0.666303	0.763	0.458	2.85134e-47	C05 - CD4+ Treg : TNFRSF9 ADT-4.1BB	CAST
ADTRP	7.28839e-52	0.434577	0.196	0.029	3.29355e-47	C05 - CD4+ Treg : TNFRSF9 ADT-4.1BB	ADTRP
PSMB8	1.04949e-51	0.595465	0.741	0.426	4.74252e-47	C05 - CD4+ Treg : TNFRSF9 ADT-4.1BB	PSMB8
CHST7	1.30512e-51	0.657875	0.293	0.072	5.89771e-47	C05 - CD4+ Treg : TNFRSF9 ADT-4.1BB	CHST7
DDHD1	1.34569e-51	0.756953	0.479	0.196	6.08102e-47	C05 - CD4+ Treg : TNFRSF9 ADT-4.1BB	DDHD1
RHOG	1.36211e-51	0.677842	0.603	0.296	6.15524e-47	C05 - CD4+ Treg : TNFRSF9 ADT-4.1BB	RHOG
PSMB1	1.4099e-51	0.603087	0.774	0.473	6.37122e-47	C05 - CD4+ Treg : TNFRSF9 ADT-4.1BB	PSMB1
SH3BGRL	1.6685e-51	0.58962	0.751	0.44	7.5398e-47	C05 - CD4+ Treg : TNFRSF9 ADT-4.1BB	SH3BGRL
EFHD2	2.59387e-51	0.626603	0.644	0.329	1.17214e-46	C05 - CD4+ Treg : TNFRSF9 ADT-4.1BB	EFHD2
PRKCDBP	3.19232e-51	0.412103	0.153	0.014	1.44258e-46	C05 - CD4+ Treg : TNFRSF9 ADT-4.1BB	PRKCDBP
IL21R	5.94003e-51	0.588343	0.389	0.128	2.68424e-46	C05 - CD4+ Treg : TNFRSF9 ADT-4.1BB	IL21R
BIRC3	9.24045e-51	0.730189	0.875	0.622	4.17567e-46	C05 - CD4+ Treg : TNFRSF9 ADT-4.1BB	BIRC3
HIVEP1	1.54352e-50	0.472518	0.331	0.097	6.97501e-46	C05 - CD4+ Treg : TNFRSF9 ADT-4.1BB	HIVEP1
CFLAR	4.37834e-50	0.71237	0.741	0.457	1.97853e-45	C05 - CD4+ Treg : TNFRSF9 ADT-4.1BB	CFLAR
IL12RB2	4.43675e-50	0.437702	0.194	0.029	2.00492e-45	C05 - CD4+ Treg : TNFRSF9 ADT-4.1BB	IL12RB2
P2RY10	1.34374e-49	0.614621	0.562	0.259	6.07224e-45	C05 - CD4+ Treg : TNFRSF9 ADT-4.1BB	P2RY10
HLA-DMA1	1.45469e-49	0.595447	0.501	0.212	6.5736e-45	C05 - CD4+ Treg : TNFRSF9 ADT-4.1BB	HLA-DMA
CD70	1.52648e-49	0.710136	0.272	0.064	6.898e-45	C05 - CD4+ Treg : TNFRSF9 ADT-4.1BB	CD70
EPHX2	1.72712e-49	0.369025	0.196	0.032	7.8047e-45	C05 - CD4+ Treg : TNFRSF9 ADT-4.1BB	EPHX2
CLIP1	3.09637e-49	0.621515	0.461	0.182	1.39922e-44	C05 - CD4+ Treg : TNFRSF9 ADT-4.1BB	CLIP1
PSMB3	3.89315e-49	0.564	0.708	0.397	1.75928e-44	C05 - CD4+ Treg : TNFRSF9 ADT-4.1BB	PSMB3
THADA	4.30804e-49	0.701367	0.3	0.08	1.94676e-44	C05 - CD4+ Treg : TNFRSF9 ADT-4.1BB	THADA
CLEC2D	7.37623e-49	0.739514	0.809	0.558	3.33325e-44	C05 - CD4+ Treg : TNFRSF9 ADT-4.1BB	CLEC2D
BRK1	1.40326e-48	0.571692	0.735	0.428	6.34119e-44	C05 - CD4+ Treg : TNFRSF9 ADT-4.1BB	BRK1
FAM184A	1.45112e-48	0.527624	0.198	0.031	6.55745e-44	C05 - CD4+ Treg : TNFRSF9 ADT-4.1BB	FAM184A
PKIA	1.4935e-48	0.5346	0.292	0.075	6.74898e-44	C05 - CD4+ Treg : TNFRSF9 ADT-4.1BB	PKIA
FRMD4B	2.56427e-48	0.756584	0.387	0.133	1.15877e-43	C05 - CD4+ Treg : TNFRSF9 ADT-4.1BB	FRMD4B
GTF3C6	3.32711e-48	0.550433	0.555	0.258	1.50349e-43	C05 - CD4+ Treg : TNFRSF9 ADT-4.1BB	GTF3C6
IFI6	4.36035e-48	0.816135	0.667	0.361	1.9704e-43	C05 - CD4+ Treg : TNFRSF9 ADT-4.1BB	IFI6
GLCCI1	5.71516e-48	0.666148	0.46	0.184	2.58262e-43	C05 - CD4+ Treg : TNFRSF9 ADT-4.1BB	GLCCI1
NDUFA4	1.69943e-47	0.555455	0.903	0.69	7.67955e-43	C05 - CD4+ Treg : TNFRSF9 ADT-4.1BB	NDUFA4
TULP4	1.75173e-47	0.44131	0.31	0.093	7.9159e-43	C05 - CD4+ Treg : TNFRSF9 ADT-4.1BB	TULP4
PRDX1	2.33067e-47	0.615798	0.843	0.591	1.05321e-42	C05 - CD4+ Treg : TNFRSF9 ADT-4.1BB	PRDX1
PPA1	2.90434e-47	0.641739	0.652	0.353	1.31244e-42	C05 - CD4+ Treg : TNFRSF9 ADT-4.1BB	PPA1
ADAM12	3.22433e-47	0.314543	0.137	0.012	1.45704e-42	C05 - CD4+ Treg : TNFRSF9 ADT-4.1BB	ADAM12
HLA-C	4.95461e-47	0.410047	1	0.982	2.23894e-42	C05 - CD4+ Treg : TNFRSF9 ADT-4.1BB	HLA-C
NDUFC2	9.74495e-47	0.532687	0.695	0.39	4.40365e-42	C05 - CD4+ Treg : TNFRSF9 ADT-4.1BB	NDUFC2
MIR3142HG	1.12841e-46	0.440374	0.209	0.039	5.09918e-42	C05 - CD4+ Treg : TNFRSF9 ADT-4.1BB	MIR3142HG
FOXO1	1.19895e-46	0.576966	0.46	0.187	5.41792e-42	C05 - CD4+ Treg : TNFRSF9 ADT-4.1BB	FOXO1
PTGIR	1.36579e-46	0.325597	0.127	0.009	6.17185e-42	C05 - CD4+ Treg : TNFRSF9 ADT-4.1BB	PTGIR
BCL2	1.39126e-46	0.527214	0.527	0.241	6.28696e-42	C05 - CD4+ Treg : TNFRSF9 ADT-4.1BB	BCL2
CDKN1B	2.17893e-46	0.624995	0.685	0.385	9.84637e-42	C05 - CD4+ Treg : TNFRSF9 ADT-4.1BB	CDKN1B
EPSTI1	2.76355e-46	0.631316	0.58	0.284	1.24882e-41	C05 - CD4+ Treg : TNFRSF9 ADT-4.1BB	EPSTI1
LIMA1	3.97686e-46	0.471112	0.315	0.095	1.7971e-41	C05 - CD4+ Treg : TNFRSF9 ADT-4.1BB	LIMA1
TMED9	7.17354e-46	0.498415	0.555	0.266	3.24165e-41	C05 - CD4+ Treg : TNFRSF9 ADT-4.1BB	TMED9
COPE	9.02039e-46	0.576642	0.75	0.458	4.07622e-41	C05 - CD4+ Treg : TNFRSF9 ADT-4.1BB	COPE
SPATS2L	1.41429e-45	0.501897	0.381	0.136	6.39105e-41	C05 - CD4+ Treg : TNFRSF9 ADT-4.1BB	SPATS2L
G3BP2	1.8678e-45	0.80484	0.746	0.521	8.44041e-41	C05 - CD4+ Treg : TNFRSF9 ADT-4.1BB	G3BP2
NEDD9	2.25296e-45	0.605251	0.488	0.211	1.01809e-40	C05 - CD4+ Treg : TNFRSF9 ADT-4.1BB	NEDD9
ADI1	2.68664e-45	0.492465	0.381	0.136	1.21407e-40	C05 - CD4+ Treg : TNFRSF9 ADT-4.1BB	ADI1
STX11	3.33285e-45	0.602266	0.437	0.173	1.50608e-40	C05 - CD4+ Treg : TNFRSF9 ADT-4.1BB	STX11
RAP1A	3.64324e-45	0.598068	0.73	0.451	1.64634e-40	C05 - CD4+ Treg : TNFRSF9 ADT-4.1BB	RAP1A
CD274	4.70281e-45	0.451643	0.193	0.032	2.12515e-40	C05 - CD4+ Treg : TNFRSF9 ADT-4.1BB	CD274
PARD6G	8.86482e-45	0.355565	0.17	0.024	4.00593e-40	C05 - CD4+ Treg : TNFRSF9 ADT-4.1BB	PARD6G
PRDX2	1.37742e-44	0.599776	0.694	0.404	6.2244e-40	C05 - CD4+ Treg : TNFRSF9 ADT-4.1BB	PRDX2
LIMS1	1.94661e-44	0.606002	0.598	0.306	8.79652e-40	C05 - CD4+ Treg : TNFRSF9 ADT-4.1BB	LIMS1
AC002331.1	2.11811e-44	0.514402	0.15	0.017	9.57152e-40	C05 - CD4+ Treg : TNFRSF9 ADT-4.1BB	AC002331.1
LAPTM4A	3.81945e-44	0.603197	0.516	0.237	1.72597e-39	C05 - CD4+ Treg : TNFRSF9 ADT-4.1BB	LAPTM4A
TMEM173	5.40577e-44	0.610618	0.555	0.27	2.44281e-39	C05 - CD4+ Treg : TNFRSF9 ADT-4.1BB	TMEM173
RAB9A	5.98716e-44	0.74699	0.458	0.193	2.70554e-39	C05 - CD4+ Treg : TNFRSF9 ADT-4.1BB	RAB9A
LYST1	8.45648e-44	0.409783	0.573	0.296	3.8214e-39	C05 - CD4+ Treg : TNFRSF9 ADT-4.1BB	LYST
IZUMO4	1.02394e-43	0.371977	0.191	0.034	4.6271e-39	C05 - CD4+ Treg : TNFRSF9 ADT-4.1BB	IZUMO4
NFAT5	1.31471e-43	0.598448	0.517	0.239	5.94106e-39	C05 - CD4+ Treg : TNFRSF9 ADT-4.1BB	NFAT5
RFTN1	1.44807e-43	0.507762	0.366	0.128	6.5437e-39	C05 - CD4+ Treg : TNFRSF9 ADT-4.1BB	RFTN1
JMY	2.42401e-43	0.805421	0.547	0.285	1.09539e-38	C05 - CD4+ Treg : TNFRSF9 ADT-4.1BB	JMY
CD79A	4.01978e-43	0.478774	0.155	0.02	1.8165e-38	C05 - CD4+ Treg : TNFRSF9 ADT-4.1BB	CD79A
RANBP9	1.04104e-42	0.454532	0.341	0.116	4.70436e-38	C05 - CD4+ Treg : TNFRSF9 ADT-4.1BB	RANBP9
PTPN1	1.16478e-42	0.637293	0.504	0.235	5.26354e-38	C05 - CD4+ Treg : TNFRSF9 ADT-4.1BB	PTPN1
SDF4	1.18211e-42	0.50392	0.507	0.235	5.34183e-38	C05 - CD4+ Treg : TNFRSF9 ADT-4.1BB	SDF4
S100A6	1.84642e-42	0.586446	0.937	0.833	8.34377e-38	C05 - CD4+ Treg : TNFRSF9 ADT-4.1BB	S100A6
NDUFV2	2.02538e-42	0.645528	0.708	0.437	9.1525e-38	C05 - CD4+ Treg : TNFRSF9 ADT-4.1BB	NDUFV2
ADAM10	2.23609e-42	0.462627	0.422	0.174	1.01047e-37	C05 - CD4+ Treg : TNFRSF9 ADT-4.1BB	ADAM10
GNG5	3.14481e-42	0.509167	0.712	0.422	1.42111e-37	C05 - CD4+ Treg : TNFRSF9 ADT-4.1BB	GNG5
MXD4	3.77538e-42	0.48123	0.634	0.347	1.70606e-37	C05 - CD4+ Treg : TNFRSF9 ADT-4.1BB	MXD4
PSMD8	4.15731e-42	0.569401	0.725	0.449	1.87865e-37	C05 - CD4+ Treg : TNFRSF9 ADT-4.1BB	PSMD8
RAB10	4.39223e-42	0.497957	0.446	0.188	1.98481e-37	C05 - CD4+ Treg : TNFRSF9 ADT-4.1BB	RAB10
ISCU	1.33549e-41	0.500806	0.702	0.414	6.03495e-37	C05 - CD4+ Treg : TNFRSF9 ADT-4.1BB	ISCU
ZNRF1	2.85083e-41	0.480048	0.478	0.216	1.28826e-36	C05 - CD4+ Treg : TNFRSF9 ADT-4.1BB	ZNRF1
H3F3A	3.92128e-41	0.44518	0.982	0.905	1.77199e-36	C05 - CD4+ Treg : TNFRSF9 ADT-4.1BB	H3F3A
GRSF1	4.56562e-41	0.568501	0.376	0.14	2.06316e-36	C05 - CD4+ Treg : TNFRSF9 ADT-4.1BB	GRSF1
NDUFB8	5.33313e-41	0.536626	0.746	0.473	2.40999e-36	C05 - CD4+ Treg : TNFRSF9 ADT-4.1BB	NDUFB8
C9orf16	5.70877e-41	0.57531	0.755	0.477	2.57974e-36	C05 - CD4+ Treg : TNFRSF9 ADT-4.1BB	C9orf16
FAM53B	1.21716e-40	0.363132	0.259	0.075	5.50022e-36	C05 - CD4+ Treg : TNFRSF9 ADT-4.1BB	FAM53B
NDUFS6	1.35595e-40	0.44907	0.623	0.342	6.12742e-36	C05 - CD4+ Treg : TNFRSF9 ADT-4.1BB	NDUFS6
NDFIP2	1.46715e-40	0.464238	0.354	0.129	6.62992e-36	C05 - CD4+ Treg : TNFRSF9 ADT-4.1BB	NDFIP2
NDUFAF3	2.4131e-40	0.411169	0.44	0.196	1.09046e-35	C05 - CD4+ Treg : TNFRSF9 ADT-4.1BB	NDUFAF3
CLEC7A	3.46254e-40	0.256492	0.12	0.012	1.56469e-35	C05 - CD4+ Treg : TNFRSF9 ADT-4.1BB	CLEC7A
MDFIC	3.46549e-40	0.602645	0.507	0.244	1.56602e-35	C05 - CD4+ Treg : TNFRSF9 ADT-4.1BB	MDFIC
C4orf48	3.63685e-40	0.47196	0.514	0.249	1.64345e-35	C05 - CD4+ Treg : TNFRSF9 ADT-4.1BB	C4orf48
GSTO1	3.84835e-40	0.500321	0.524	0.255	1.73903e-35	C05 - CD4+ Treg : TNFRSF9 ADT-4.1BB	GSTO1
ATP6V1F	4.49066e-40	0.431454	0.616	0.34	2.02929e-35	C05 - CD4+ Treg : TNFRSF9 ADT-4.1BB	ATP6V1F
COX17	5.4466e-40	0.575607	0.583	0.308	2.46127e-35	C05 - CD4+ Treg : TNFRSF9 ADT-4.1BB	COX17
NDUFB1	5.76824e-40	0.478306	0.573	0.3	2.60661e-35	C05 - CD4+ Treg : TNFRSF9 ADT-4.1BB	NDUFB1
CD28	6.33249e-40	0.482729	0.432	0.186	2.86159e-35	C05 - CD4+ Treg : TNFRSF9 ADT-4.1BB	CD28
MAN1A2	8.71031e-40	0.472628	0.374	0.143	3.9361e-35	C05 - CD4+ Treg : TNFRSF9 ADT-4.1BB	MAN1A2
TNIP2	1.82179e-39	0.587955	0.428	0.184	8.23247e-35	C05 - CD4+ Treg : TNFRSF9 ADT-4.1BB	TNIP2
PPP1CA	1.84749e-39	0.495695	0.623	0.344	8.34864e-35	C05 - CD4+ Treg : TNFRSF9 ADT-4.1BB	PPP1CA
PSMA2	1.95463e-39	0.526012	0.58	0.305	8.8328e-35	C05 - CD4+ Treg : TNFRSF9 ADT-4.1BB	PSMA2
ATP6V0E1	2.2173e-39	0.541641	0.837	0.606	1.00198e-34	C05 - CD4+ Treg : TNFRSF9 ADT-4.1BB	ATP6V0E1
MRPS61	2.33358e-39	0.575882	0.651	0.371	1.05452e-34	C05 - CD4+ Treg : TNFRSF9 ADT-4.1BB	MRPS6
IL2RB	2.86087e-39	0.436588	0.527	0.266	1.2928e-34	C05 - CD4+ Treg : TNFRSF9 ADT-4.1BB	IL2RB
PIM2	2.94588e-39	0.616901	0.44	0.19	1.33121e-34	C05 - CD4+ Treg : TNFRSF9 ADT-4.1BB	PIM2
NDUFA13	3.33617e-39	0.464668	0.662	0.383	1.50758e-34	C05 - CD4+ Treg : TNFRSF9 ADT-4.1BB	NDUFA13
PAK2	3.62131e-39	0.574877	0.611	0.339	1.63643e-34	C05 - CD4+ Treg : TNFRSF9 ADT-4.1BB	PAK2
IL6ST	3.74478e-39	0.385345	0.468	0.223	1.69223e-34	C05 - CD4+ Treg : TNFRSF9 ADT-4.1BB	IL6ST
CADM1	5.07648e-39	0.414321	0.132	0.015	2.29401e-34	C05 - CD4+ Treg : TNFRSF9 ADT-4.1BB	CADM1
AP2M1	5.95082e-39	0.461518	0.586	0.315	2.68912e-34	C05 - CD4+ Treg : TNFRSF9 ADT-4.1BB	AP2M1
ARPP19	7.25143e-39	0.525147	0.554	0.284	3.27685e-34	C05 - CD4+ Treg : TNFRSF9 ADT-4.1BB	ARPP19
RNF145	8.58422e-39	0.444008	0.42	0.181	3.87912e-34	C05 - CD4+ Treg : TNFRSF9 ADT-4.1BB	RNF145
MICAL2	9.63558e-39	0.375882	0.224	0.055	4.35422e-34	C05 - CD4+ Treg : TNFRSF9 ADT-4.1BB	MICAL2
IL10RA	1.06046e-38	0.58735	0.595	0.322	4.79211e-34	C05 - CD4+ Treg : TNFRSF9 ADT-4.1BB	IL10RA
UBE2D2	1.17162e-38	0.474394	0.791	0.526	5.29444e-34	C05 - CD4+ Treg : TNFRSF9 ADT-4.1BB	UBE2D2
METTL7A	2.65295e-38	0.30132	0.129	0.015	1.19884e-33	C05 - CD4+ Treg : TNFRSF9 ADT-4.1BB	METTL7A
HAPLN3	2.76489e-38	0.438853	0.318	0.11	1.24942e-33	C05 - CD4+ Treg : TNFRSF9 ADT-4.1BB	HAPLN3
TIAM1	2.88567e-38	0.469474	0.269	0.079	1.30401e-33	C05 - CD4+ Treg : TNFRSF9 ADT-4.1BB	TIAM1
NSF	3.06187e-38	0.355896	0.249	0.071	1.38363e-33	C05 - CD4+ Treg : TNFRSF9 ADT-4.1BB	NSF
MAT2B	4.61739e-38	0.477862	0.387	0.156	2.08655e-33	C05 - CD4+ Treg : TNFRSF9 ADT-4.1BB	MAT2B
PDGFA	4.69337e-38	0.316182	0.143	0.02	2.12089e-33	C05 - CD4+ Treg : TNFRSF9 ADT-4.1BB	PDGFA
TDRD3	5.24205e-38	0.46715	0.287	0.09	2.36883e-33	C05 - CD4+ Treg : TNFRSF9 ADT-4.1BB	TDRD3
VAMP5	6.04221e-38	0.533811	0.527	0.264	2.73041e-33	C05 - CD4+ Treg : TNFRSF9 ADT-4.1BB	VAMP5
TNIP1	8.47785e-38	0.443583	0.448	0.202	3.83106e-33	C05 - CD4+ Treg : TNFRSF9 ADT-4.1BB	TNIP1
GNA15	9.65531e-38	0.471033	0.293	0.095	4.36314e-33	C05 - CD4+ Treg : TNFRSF9 ADT-4.1BB	GNA15
PTP4A3	1.02221e-37	0.573993	0.186	0.039	4.61927e-33	C05 - CD4+ Treg : TNFRSF9 ADT-4.1BB	PTP4A3
HLA-DQB11	1.04102e-37	0.52874	0.555	0.29	4.70429e-33	C05 - CD4+ Treg : TNFRSF9 ADT-4.1BB	HLA-DQB1
PRELID1	1.04564e-37	0.357153	0.679	0.412	4.72516e-33	C05 - CD4+ Treg : TNFRSF9 ADT-4.1BB	PRELID1
RHOH	1.54086e-37	0.591838	0.812	0.577	6.96301e-33	C05 - CD4+ Treg : TNFRSF9 ADT-4.1BB	RHOH
VAMP8	2.65953e-37	0.510924	0.735	0.468	1.20181e-32	C05 - CD4+ Treg : TNFRSF9 ADT-4.1BB	VAMP8
C16orf87	2.6778e-37	0.485137	0.288	0.092	1.21007e-32	C05 - CD4+ Treg : TNFRSF9 ADT-4.1BB	C16orf87
KLHL2	3.85621e-37	0.308629	0.193	0.042	1.74258e-32	C05 - CD4+ Treg : TNFRSF9 ADT-4.1BB	KLHL2
TTN	4.85774e-37	0.287862	0.275	0.091	2.19517e-32	C05 - CD4+ Treg : TNFRSF9 ADT-4.1BB	TTN
SKAP1	5.24823e-37	0.514103	0.671	0.4	2.37162e-32	C05 - CD4+ Treg : TNFRSF9 ADT-4.1BB	SKAP1
TFRC	5.3038e-37	0.508407	0.512	0.255	2.39674e-32	C05 - CD4+ Treg : TNFRSF9 ADT-4.1BB	TFRC
OTUD5	5.38908e-37	0.534516	0.374	0.149	2.43527e-32	C05 - CD4+ Treg : TNFRSF9 ADT-4.1BB	OTUD5
RPS26	5.65017e-37	0.528986	0.931	0.792	2.55326e-32	C05 - CD4+ Treg : TNFRSF9 ADT-4.1BB	RPS26
EED	6.96467e-37	0.398716	0.359	0.145	3.14726e-32	C05 - CD4+ Treg : TNFRSF9 ADT-4.1BB	EED
DUSP10	7.44036e-37	0.497224	0.488	0.235	3.36222e-32	C05 - CD4+ Treg : TNFRSF9 ADT-4.1BB	DUSP10
APOLD1	7.97788e-37	0.384871	0.244	0.069	3.60513e-32	C05 - CD4+ Treg : TNFRSF9 ADT-4.1BB	APOLD1
PAIP2	8.29353e-37	0.516977	0.736	0.478	3.74777e-32	C05 - CD4+ Treg : TNFRSF9 ADT-4.1BB	PAIP2
SLAMF1	9.361e-37	0.472749	0.362	0.144	4.23014e-32	C05 - CD4+ Treg : TNFRSF9 ADT-4.1BB	SLAMF1
ACTB	9.6174e-37	0.512697	1	0.975	4.34601e-32	C05 - CD4+ Treg : TNFRSF9 ADT-4.1BB	ACTB
SUMO1	1.12288e-36	0.418372	0.713	0.445	5.07418e-32	C05 - CD4+ Treg : TNFRSF9 ADT-4.1BB	SUMO1
VCP	1.22517e-36	0.538649	0.567	0.306	5.53641e-32	C05 - CD4+ Treg : TNFRSF9 ADT-4.1BB	VCP
GRB2	1.49376e-36	0.472429	0.563	0.3	6.75017e-32	C05 - CD4+ Treg : TNFRSF9 ADT-4.1BB	GRB2
CDK6	2.16269e-36	0.452217	0.372	0.151	9.77297e-32	C05 - CD4+ Treg : TNFRSF9 ADT-4.1BB	CDK6
CMTM6	2.65504e-36	0.548162	0.554	0.293	1.19979e-31	C05 - CD4+ Treg : TNFRSF9 ADT-4.1BB	CMTM6
FAM129A	3.1809e-36	0.530719	0.568	0.305	1.43742e-31	C05 - CD4+ Treg : TNFRSF9 ADT-4.1BB	FAM129A
ANXA7	3.42872e-36	0.447012	0.498	0.246	1.5494e-31	C05 - CD4+ Treg : TNFRSF9 ADT-4.1BB	ANXA7
IFNAR2	3.67418e-36	0.370367	0.326	0.123	1.66032e-31	C05 - CD4+ Treg : TNFRSF9 ADT-4.1BB	IFNAR2
NGFRAP1	3.74018e-36	0.445658	0.147	0.023	1.69015e-31	C05 - CD4+ Treg : TNFRSF9 ADT-4.1BB	NGFRAP1
GBP4	5.5133e-36	0.488345	0.433	0.195	2.4914e-31	C05 - CD4+ Treg : TNFRSF9 ADT-4.1BB	GBP4
SPCS1	6.59123e-36	0.478508	0.774	0.517	2.97851e-31	C05 - CD4+ Treg : TNFRSF9 ADT-4.1BB	SPCS1
HS3ST3B1	6.97252e-36	0.406715	0.229	0.063	3.15081e-31	C05 - CD4+ Treg : TNFRSF9 ADT-4.1BB	HS3ST3B1
LAT	8.10982e-36	0.42128	0.682	0.417	3.66474e-31	C05 - CD4+ Treg : TNFRSF9 ADT-4.1BB	LAT
TSPAN5	9.94289e-36	0.477674	0.344	0.131	4.49309e-31	C05 - CD4+ Treg : TNFRSF9 ADT-4.1BB	TSPAN5
TRIB1	1.1623e-35	0.387825	0.181	0.037	5.25232e-31	C05 - CD4+ Treg : TNFRSF9 ADT-4.1BB	TRIB1
CD59	1.2313e-35	0.371377	0.336	0.132	5.56413e-31	C05 - CD4+ Treg : TNFRSF9 ADT-4.1BB	CD59
PSMA5	1.23243e-35	0.485339	0.616	0.351	5.56921e-31	C05 - CD4+ Treg : TNFRSF9 ADT-4.1BB	PSMA5
SAR1B	1.39222e-35	0.445133	0.425	0.19	6.29129e-31	C05 - CD4+ Treg : TNFRSF9 ADT-4.1BB	SAR1B
RYBP	1.39426e-35	0.559895	0.511	0.258	6.30051e-31	C05 - CD4+ Treg : TNFRSF9 ADT-4.1BB	RYBP
LMAN1	1.43103e-35	0.465585	0.466	0.222	6.4667e-31	C05 - CD4+ Treg : TNFRSF9 ADT-4.1BB	LMAN1
HNRNPLL	2.26192e-35	0.42443	0.367	0.152	1.02214e-30	C05 - CD4+ Treg : TNFRSF9 ADT-4.1BB	HNRNPLL
ZEB1	2.6632e-35	0.453149	0.381	0.159	1.20348e-30	C05 - CD4+ Treg : TNFRSF9 ADT-4.1BB	ZEB1
SQSTM11	6.13407e-35	0.42455	0.827	0.583	2.77192e-30	C05 - CD4+ Treg : TNFRSF9 ADT-4.1BB	SQSTM1
CEP120	7.40237e-35	0.415309	0.231	0.063	3.34506e-30	C05 - CD4+ Treg : TNFRSF9 ADT-4.1BB	CEP120
ECH1	8.34335e-35	0.395752	0.524	0.277	3.77027e-30	C05 - CD4+ Treg : TNFRSF9 ADT-4.1BB	ECH1
HSPB1	8.37393e-35	0.52994	0.69	0.428	3.7841e-30	C05 - CD4+ Treg : TNFRSF9 ADT-4.1BB	HSPB1
MZB1	1.09546e-34	0.306749	0.196	0.048	4.95027e-30	C05 - CD4+ Treg : TNFRSF9 ADT-4.1BB	MZB1
TMEM258	1.60359e-34	0.435186	0.72	0.459	7.24646e-30	C05 - CD4+ Treg : TNFRSF9 ADT-4.1BB	TMEM258
GPX1	1.60792e-34	0.726252	0.428	0.208	7.26602e-30	C05 - CD4+ Treg : TNFRSF9 ADT-4.1BB	GPX1
PIM3	1.624e-34	0.650486	0.661	0.405	7.33868e-30	C05 - CD4+ Treg : TNFRSF9 ADT-4.1BB	PIM3
SCAND1	1.98087e-34	0.552491	0.585	0.329	8.95137e-30	C05 - CD4+ Treg : TNFRSF9 ADT-4.1BB	SCAND1
CDKN2A	2.45309e-34	0.410743	0.224	0.061	1.10853e-29	C05 - CD4+ Treg : TNFRSF9 ADT-4.1BB	CDKN2A
NDUFC1	2.56557e-34	0.443068	0.389	0.167	1.15936e-29	C05 - CD4+ Treg : TNFRSF9 ADT-4.1BB	NDUFC1
FAM173A	3.2707e-34	0.341035	0.376	0.168	1.478e-29	C05 - CD4+ Treg : TNFRSF9 ADT-4.1BB	FAM173A
SLC12A6	3.37246e-34	0.289328	0.196	0.05	1.52398e-29	C05 - CD4+ Treg : TNFRSF9 ADT-4.1BB	SLC12A6
HDAC7	3.44719e-34	0.41385	0.293	0.103	1.55775e-29	C05 - CD4+ Treg : TNFRSF9 ADT-4.1BB	HDAC7
CDV3	4.14513e-34	0.478659	0.697	0.438	1.87314e-29	C05 - CD4+ Treg : TNFRSF9 ADT-4.1BB	CDV3
HSPA4	4.95099e-34	0.648417	0.506	0.269	2.2373e-29	C05 - CD4+ Treg : TNFRSF9 ADT-4.1BB	HSPA4
PSMB2	5.34143e-34	0.428746	0.54	0.29	2.41374e-29	C05 - CD4+ Treg : TNFRSF9 ADT-4.1BB	PSMB2
PMVK	5.46711e-34	0.450659	0.364	0.149	2.47053e-29	C05 - CD4+ Treg : TNFRSF9 ADT-4.1BB	PMVK
VOPP1	6.03294e-34	0.399431	0.451	0.219	2.72623e-29	C05 - CD4+ Treg : TNFRSF9 ADT-4.1BB	VOPP1
LY75	7.07018e-34	0.335988	0.194	0.047	3.19494e-29	C05 - CD4+ Treg : TNFRSF9 ADT-4.1BB	LY75
TPP1	1.12211e-33	0.374661	0.325	0.127	5.07069e-29	C05 - CD4+ Treg : TNFRSF9 ADT-4.1BB	TPP1
TMCO1	1.24097e-33	0.314706	0.55	0.314	5.60783e-29	C05 - CD4+ Treg : TNFRSF9 ADT-4.1BB	TMCO1
DNAJB4	1.51229e-33	0.570421	0.471	0.232	6.83387e-29	C05 - CD4+ Treg : TNFRSF9 ADT-4.1BB	DNAJB4
ARF6	1.63844e-33	0.501206	0.763	0.517	7.40393e-29	C05 - CD4+ Treg : TNFRSF9 ADT-4.1BB	ARF6
FAM104A	1.68764e-33	0.347973	0.282	0.099	7.62629e-29	C05 - CD4+ Treg : TNFRSF9 ADT-4.1BB	FAM104A
LINC01588	1.87381e-33	0.455079	0.222	0.061	8.46754e-29	C05 - CD4+ Treg : TNFRSF9 ADT-4.1BB	LINC01588
PSMC3	1.91764e-33	0.379676	0.418	0.197	8.66561e-29	C05 - CD4+ Treg : TNFRSF9 ADT-4.1BB	PSMC3
MYL6B	2.16496e-33	0.323496	0.213	0.056	9.78326e-29	C05 - CD4+ Treg : TNFRSF9 ADT-4.1BB	MYL6B
ZNF282	2.20128e-33	0.351979	0.158	0.03	9.94735e-29	C05 - CD4+ Treg : TNFRSF9 ADT-4.1BB	ZNF282
HLA-B	2.4575e-33	0.315447	0.998	0.992	1.11052e-28	C05 - CD4+ Treg : TNFRSF9 ADT-4.1BB	HLA-B
MGST2	2.53175e-33	0.283289	0.17	0.037	1.14407e-28	C05 - CD4+ Treg : TNFRSF9 ADT-4.1BB	MGST2
VMA21	2.5584e-33	0.470929	0.374	0.157	1.15611e-28	C05 - CD4+ Treg : TNFRSF9 ADT-4.1BB	VMA21
UBE2N	3.4023e-33	0.29532	0.591	0.357	1.53747e-28	C05 - CD4+ Treg : TNFRSF9 ADT-4.1BB	UBE2N
VAV3	4.7357e-33	0.449468	0.27	0.09	2.14001e-28	C05 - CD4+ Treg : TNFRSF9 ADT-4.1BB	VAV3
SERBP1	4.85101e-33	0.502386	0.764	0.537	2.19212e-28	C05 - CD4+ Treg : TNFRSF9 ADT-4.1BB	SERBP1
SRA1	7.05679e-33	0.364882	0.354	0.15	3.18889e-28	C05 - CD4+ Treg : TNFRSF9 ADT-4.1BB	SRA1
RANBP1	7.34795e-33	0.522381	0.578	0.327	3.32046e-28	C05 - CD4+ Treg : TNFRSF9 ADT-4.1BB	RANBP1
SIT1	7.87793e-33	0.324066	0.415	0.204	3.55996e-28	C05 - CD4+ Treg : TNFRSF9 ADT-4.1BB	SIT1
AURKAIP1	8.60341e-33	0.361731	0.563	0.322	3.88779e-28	C05 - CD4+ Treg : TNFRSF9 ADT-4.1BB	AURKAIP1
NDUFB7	8.93622e-33	0.319336	0.575	0.336	4.03819e-28	C05 - CD4+ Treg : TNFRSF9 ADT-4.1BB	NDUFB7
SF3B6	1.4401e-32	0.370574	0.601	0.356	6.50767e-28	C05 - CD4+ Treg : TNFRSF9 ADT-4.1BB	SF3B6
SCAMP2	1.72767e-32	0.32854	0.395	0.186	7.80715e-28	C05 - CD4+ Treg : TNFRSF9 ADT-4.1BB	SCAMP2
HADHB	1.9368e-32	0.33037	0.374	0.168	8.7522e-28	C05 - CD4+ Treg : TNFRSF9 ADT-4.1BB	HADHB
OTULIN	2.18813e-32	0.423868	0.394	0.178	9.88793e-28	C05 - CD4+ Treg : TNFRSF9 ADT-4.1BB	OTULIN
HBP11	2.28723e-32	0.484078	0.679	0.426	1.03357e-27	C05 - CD4+ Treg : TNFRSF9 ADT-4.1BB	HBP1
SUB1	2.66008e-32	0.442977	0.921	0.749	1.20206e-27	C05 - CD4+ Treg : TNFRSF9 ADT-4.1BB	SUB1
PSMB7	2.76912e-32	0.349846	0.456	0.232	1.25134e-27	C05 - CD4+ Treg : TNFRSF9 ADT-4.1BB	PSMB7
WDR1	2.7879e-32	0.356071	0.498	0.268	1.25983e-27	C05 - CD4+ Treg : TNFRSF9 ADT-4.1BB	WDR1
MIIP	2.89828e-32	0.38985	0.297	0.109	1.30971e-27	C05 - CD4+ Treg : TNFRSF9 ADT-4.1BB	MIIP
UBL5	2.94083e-32	0.419048	0.895	0.697	1.32893e-27	C05 - CD4+ Treg : TNFRSF9 ADT-4.1BB	UBL5
SNRPC	3.07665e-32	0.386203	0.389	0.174	1.39031e-27	C05 - CD4+ Treg : TNFRSF9 ADT-4.1BB	SNRPC
TPMT	3.15447e-32	0.350828	0.229	0.068	1.42547e-27	C05 - CD4+ Treg : TNFRSF9 ADT-4.1BB	TPMT
EML2	3.45518e-32	0.410802	0.303	0.112	1.56136e-27	C05 - CD4+ Treg : TNFRSF9 ADT-4.1BB	EML2
FNDC3B	4.41465e-32	0.385134	0.217	0.061	1.99494e-27	C05 - CD4+ Treg : TNFRSF9 ADT-4.1BB	FNDC3B
ADK	4.96e-32	0.269721	0.26	0.095	2.24137e-27	C05 - CD4+ Treg : TNFRSF9 ADT-4.1BB	ADK
ERH	5.16088e-32	0.397579	0.605	0.358	2.33215e-27	C05 - CD4+ Treg : TNFRSF9 ADT-4.1BB	ERH
RAB2A	5.44412e-32	0.438895	0.534	0.29	2.46014e-27	C05 - CD4+ Treg : TNFRSF9 ADT-4.1BB	RAB2A
DAPP1	5.86453e-32	0.396131	0.269	0.092	2.65012e-27	C05 - CD4+ Treg : TNFRSF9 ADT-4.1BB	DAPP1
RNF187	6.18463e-32	0.391784	0.397	0.183	2.79477e-27	C05 - CD4+ Treg : TNFRSF9 ADT-4.1BB	RNF187
TLK1	7.11353e-32	0.408352	0.446	0.221	3.21453e-27	C05 - CD4+ Treg : TNFRSF9 ADT-4.1BB	TLK1
PSMD7	7.44488e-32	0.415965	0.47	0.237	3.36427e-27	C05 - CD4+ Treg : TNFRSF9 ADT-4.1BB	PSMD7
NOL7	7.81023e-32	0.40388	0.527	0.286	3.52937e-27	C05 - CD4+ Treg : TNFRSF9 ADT-4.1BB	NOL7
EID1	9.04807e-32	0.382604	0.61	0.364	4.08873e-27	C05 - CD4+ Treg : TNFRSF9 ADT-4.1BB	EID1
CTNNA1	1.12509e-31	0.327866	0.213	0.061	5.08416e-27	C05 - CD4+ Treg : TNFRSF9 ADT-4.1BB	CTNNA1
TAB2	1.15084e-31	0.330756	0.339	0.145	5.20052e-27	C05 - CD4+ Treg : TNFRSF9 ADT-4.1BB	TAB2
MORC3	1.28452e-31	0.409935	0.366	0.158	5.80462e-27	C05 - CD4+ Treg : TNFRSF9 ADT-4.1BB	MORC3
TMPO	1.32657e-31	0.265628	0.376	0.189	5.99463e-27	C05 - CD4+ Treg : TNFRSF9 ADT-4.1BB	TMPO
ECI1	1.73182e-31	0.32384	0.288	0.11	7.82594e-27	C05 - CD4+ Treg : TNFRSF9 ADT-4.1BB	ECI1
ZNF688	1.74075e-31	0.33664	0.245	0.081	7.86627e-27	C05 - CD4+ Treg : TNFRSF9 ADT-4.1BB	ZNF688
PAFAH1B3	1.80728e-31	0.335144	0.262	0.09	8.16693e-27	C05 - CD4+ Treg : TNFRSF9 ADT-4.1BB	PAFAH1B3
HERPUD1	1.99212e-31	0.478233	0.86	0.65	9.00217e-27	C05 - CD4+ Treg : TNFRSF9 ADT-4.1BB	HERPUD1
COMMD3	2.03972e-31	0.416383	0.384	0.172	9.21728e-27	C05 - CD4+ Treg : TNFRSF9 ADT-4.1BB	COMMD3
IQGAP1	2.14718e-31	0.420972	0.727	0.479	9.70289e-27	C05 - CD4+ Treg : TNFRSF9 ADT-4.1BB	IQGAP1
FOXN3	2.50207e-31	0.331501	0.504	0.276	1.13066e-26	C05 - CD4+ Treg : TNFRSF9 ADT-4.1BB	FOXN3
RERE	2.77828e-31	0.282293	0.265	0.101	1.25548e-26	C05 - CD4+ Treg : TNFRSF9 ADT-4.1BB	RERE
ANAPC16	2.96213e-31	0.38294	0.802	0.567	1.33856e-26	C05 - CD4+ Treg : TNFRSF9 ADT-4.1BB	ANAPC16
EMC7	3.07169e-31	0.368343	0.488	0.258	1.38807e-26	C05 - CD4+ Treg : TNFRSF9 ADT-4.1BB	EMC7
POMP	3.27044e-31	0.41188	0.682	0.433	1.47788e-26	C05 - CD4+ Treg : TNFRSF9 ADT-4.1BB	POMP
DCTN2	3.48178e-31	0.252081	0.351	0.168	1.57338e-26	C05 - CD4+ Treg : TNFRSF9 ADT-4.1BB	DCTN2
C3orf38	3.63958e-31	0.261474	0.273	0.107	1.64469e-26	C05 - CD4+ Treg : TNFRSF9 ADT-4.1BB	C3orf38
COMMD7	4.53746e-31	0.323614	0.489	0.267	2.05043e-26	C05 - CD4+ Treg : TNFRSF9 ADT-4.1BB	COMMD7
PSMC5	4.7356e-31	0.382588	0.535	0.298	2.13997e-26	C05 - CD4+ Treg : TNFRSF9 ADT-4.1BB	PSMC5
RPS6KA5	4.90349e-31	0.263142	0.328	0.148	2.21584e-26	C05 - CD4+ Treg : TNFRSF9 ADT-4.1BB	RPS6KA5
TAX1BP1	7.9009e-31	0.462995	0.641	0.395	3.57034e-26	C05 - CD4+ Treg : TNFRSF9 ADT-4.1BB	TAX1BP1
WDR83OS	8.03804e-31	0.367334	0.656	0.411	3.63231e-26	C05 - CD4+ Treg : TNFRSF9 ADT-4.1BB	WDR83OS
YIPF6	9.13365e-31	0.42001	0.306	0.118	4.1274e-26	C05 - CD4+ Treg : TNFRSF9 ADT-4.1BB	YIPF6
ACADVL	9.26303e-31	0.421887	0.446	0.221	4.18587e-26	C05 - CD4+ Treg : TNFRSF9 ADT-4.1BB	ACADVL
ICAM3	9.30704e-31	0.448412	0.733	0.495	4.20576e-26	C05 - CD4+ Treg : TNFRSF9 ADT-4.1BB	ICAM3
SH3KBP1	9.3996e-31	0.458441	0.605	0.359	4.24759e-26	C05 - CD4+ Treg : TNFRSF9 ADT-4.1BB	SH3KBP1
CREBRF	9.45993e-31	0.366315	0.567	0.331	4.27485e-26	C05 - CD4+ Treg : TNFRSF9 ADT-4.1BB	CREBRF
USP48	1.19901e-30	0.351884	0.359	0.161	5.41822e-26	C05 - CD4+ Treg : TNFRSF9 ADT-4.1BB	USP48
AKIP1	1.24801e-30	0.303631	0.198	0.055	5.63961e-26	C05 - CD4+ Treg : TNFRSF9 ADT-4.1BB	AKIP1
CSNK1G3	1.36478e-30	0.434702	0.313	0.122	6.1673e-26	C05 - CD4+ Treg : TNFRSF9 ADT-4.1BB	CSNK1G3
HLA-DPB11	1.36911e-30	0.38523	0.764	0.525	6.18688e-26	C05 - CD4+ Treg : TNFRSF9 ADT-4.1BB	HLA-DPB1
CHCHD2	1.39765e-30	0.383503	0.936	0.786	6.31584e-26	C05 - CD4+ Treg : TNFRSF9 ADT-4.1BB	CHCHD2
PHPT1	1.51625e-30	0.465628	0.57	0.327	6.85179e-26	C05 - CD4+ Treg : TNFRSF9 ADT-4.1BB	PHPT1
CCDC141	1.52077e-30	0.254345	0.175	0.048	6.87221e-26	C05 - CD4+ Treg : TNFRSF9 ADT-4.1BB	CCDC141
MIR181A1HG	1.63972e-30	0.420087	0.201	0.054	7.40972e-26	C05 - CD4+ Treg : TNFRSF9 ADT-4.1BB	MIR181A1HG
LAMTOR5	1.79475e-30	0.369722	0.565	0.327	8.11031e-26	C05 - CD4+ Treg : TNFRSF9 ADT-4.1BB	LAMTOR5
SLC5A3	1.84965e-30	0.332321	0.557	0.324	8.35838e-26	C05 - CD4+ Treg : TNFRSF9 ADT-4.1BB	SLC5A3
PTGES3	1.85114e-30	0.495967	0.817	0.617	8.36512e-26	C05 - CD4+ Treg : TNFRSF9 ADT-4.1BB	PTGES3
DOK2	2.15903e-30	0.47038	0.616	0.371	9.75646e-26	C05 - CD4+ Treg : TNFRSF9 ADT-4.1BB	DOK2
NINJ2	2.19387e-30	0.30118	0.185	0.048	9.9139e-26	C05 - CD4+ Treg : TNFRSF9 ADT-4.1BB	NINJ2
STK24	2.23124e-30	0.331381	0.412	0.205	1.00827e-25	C05 - CD4+ Treg : TNFRSF9 ADT-4.1BB	STK24
LSP1	2.29698e-30	0.476747	0.774	0.548	1.03798e-25	C05 - CD4+ Treg : TNFRSF9 ADT-4.1BB	LSP1
PSMB9	2.37817e-30	0.323388	0.791	0.556	1.07467e-25	C05 - CD4+ Treg : TNFRSF9 ADT-4.1BB	PSMB9
BCL2L1	2.38694e-30	0.25268	0.185	0.052	1.07864e-25	C05 - CD4+ Treg : TNFRSF9 ADT-4.1BB	BCL2L1
NDUFA6	2.51384e-30	0.463765	0.537	0.298	1.13598e-25	C05 - CD4+ Treg : TNFRSF9 ADT-4.1BB	NDUFA6
ARHGDIB	2.52768e-30	0.424744	0.932	0.795	1.14223e-25	C05 - CD4+ Treg : TNFRSF9 ADT-4.1BB	ARHGDIB
PRDX5	3.01967e-30	0.441112	0.616	0.372	1.36456e-25	C05 - CD4+ Treg : TNFRSF9 ADT-4.1BB	PRDX5
OAS1	3.18791e-30	0.394659	0.277	0.101	1.44058e-25	C05 - CD4+ Treg : TNFRSF9 ADT-4.1BB	OAS1
BAX	3.456e-30	0.46299	0.629	0.385	1.56173e-25	C05 - CD4+ Treg : TNFRSF9 ADT-4.1BB	BAX
RP11-214O1.3	3.49778e-30	0.396879	0.138	0.025	1.58061e-25	C05 - CD4+ Treg : TNFRSF9 ADT-4.1BB	RP11-214O1.3
COX6A1	3.63533e-30	0.397773	0.804	0.574	1.64277e-25	C05 - CD4+ Treg : TNFRSF9 ADT-4.1BB	COX6A1
NDUFS7	4.99203e-30	0.318474	0.514	0.291	2.25585e-25	C05 - CD4+ Treg : TNFRSF9 ADT-4.1BB	NDUFS7
TRAPPC1	5.45801e-30	0.428657	0.611	0.369	2.46642e-25	C05 - CD4+ Treg : TNFRSF9 ADT-4.1BB	TRAPPC1
TERF2IP	5.66348e-30	0.312583	0.708	0.471	2.55927e-25	C05 - CD4+ Treg : TNFRSF9 ADT-4.1BB	TERF2IP
HSBP1	5.89716e-30	0.305708	0.367	0.176	2.66487e-25	C05 - CD4+ Treg : TNFRSF9 ADT-4.1BB	HSBP1
TM9SF2	5.99185e-30	0.289377	0.326	0.142	2.70766e-25	C05 - CD4+ Treg : TNFRSF9 ADT-4.1BB	TM9SF2
ERI1	6.53115e-30	0.323479	0.191	0.05	2.95136e-25	C05 - CD4+ Treg : TNFRSF9 ADT-4.1BB	ERI1
CLTA	6.58125e-30	0.41759	0.563	0.325	2.974e-25	C05 - CD4+ Treg : TNFRSF9 ADT-4.1BB	CLTA
SH3GLB1	6.64569e-30	0.397454	0.521	0.288	3.00312e-25	C05 - CD4+ Treg : TNFRSF9 ADT-4.1BB	SH3GLB1
NDFIP1	6.85427e-30	0.430676	0.692	0.449	3.09737e-25	C05 - CD4+ Treg : TNFRSF9 ADT-4.1BB	NDFIP1
COPZ1	7.23179e-30	0.350188	0.407	0.198	3.26797e-25	C05 - CD4+ Treg : TNFRSF9 ADT-4.1BB	COPZ1
CASK	7.32357e-30	0.33068	0.453	0.24	3.30945e-25	C05 - CD4+ Treg : TNFRSF9 ADT-4.1BB	CASK
ACBD3	7.39175e-30	0.41305	0.343	0.145	3.34026e-25	C05 - CD4+ Treg : TNFRSF9 ADT-4.1BB	ACBD3
LST1	7.91575e-30	0.417735	0.234	0.074	3.57705e-25	C05 - CD4+ Treg : TNFRSF9 ADT-4.1BB	LST1
RBBP8	8.02723e-30	0.463408	0.216	0.065	3.62743e-25	C05 - CD4+ Treg : TNFRSF9 ADT-4.1BB	RBBP8
NUDT5	9.0255e-30	0.337615	0.382	0.18	4.07853e-25	C05 - CD4+ Treg : TNFRSF9 ADT-4.1BB	NUDT5
FBXO45	9.4991e-30	0.326134	0.229	0.073	4.29255e-25	C05 - CD4+ Treg : TNFRSF9 ADT-4.1BB	FBXO45
SNRPD1	1.00827e-29	0.333879	0.44	0.232	4.55629e-25	C05 - CD4+ Treg : TNFRSF9 ADT-4.1BB	SNRPD1
MBD2	1.1865e-29	0.397754	0.534	0.3	5.36168e-25	C05 - CD4+ Treg : TNFRSF9 ADT-4.1BB	MBD2
UHRF2	1.21464e-29	0.366433	0.348	0.156	5.48886e-25	C05 - CD4+ Treg : TNFRSF9 ADT-4.1BB	UHRF2
NDUFA11	1.26766e-29	0.385267	0.664	0.423	5.72843e-25	C05 - CD4+ Treg : TNFRSF9 ADT-4.1BB	NDUFA11
CHCHD1	1.55029e-29	0.302429	0.346	0.158	7.00559e-25	C05 - CD4+ Treg : TNFRSF9 ADT-4.1BB	CHCHD1
DYNC1I2	2.13334e-29	0.447955	0.341	0.144	9.64035e-25	C05 - CD4+ Treg : TNFRSF9 ADT-4.1BB	DYNC1I2
TCEA1	2.94832e-29	0.312746	0.521	0.299	1.33232e-24	C05 - CD4+ Treg : TNFRSF9 ADT-4.1BB	TCEA1
TPM4	2.99072e-29	0.392693	0.575	0.342	1.35148e-24	C05 - CD4+ Treg : TNFRSF9 ADT-4.1BB	TPM4
GALM	3.44381e-29	0.334981	0.433	0.225	1.55622e-24	C05 - CD4+ Treg : TNFRSF9 ADT-4.1BB	GALM
EIF4E	3.742e-29	0.285198	0.399	0.2	1.69097e-24	C05 - CD4+ Treg : TNFRSF9 ADT-4.1BB	EIF4E
CUL3	4.26892e-29	0.452693	0.535	0.302	1.92908e-24	C05 - CD4+ Treg : TNFRSF9 ADT-4.1BB	CUL3
ISG15	4.30672e-29	0.388059	0.796	0.568	1.94616e-24	C05 - CD4+ Treg : TNFRSF9 ADT-4.1BB	ISG15
TALDO1	4.68389e-29	0.339477	0.483	0.265	2.1166e-24	C05 - CD4+ Treg : TNFRSF9 ADT-4.1BB	TALDO1
CREM2	5.83293e-29	0.51448	0.903	0.726	2.63584e-24	C05 - CD4+ Treg : TNFRSF9 ADT-4.1BB	CREM
SHMT2	6.31293e-29	0.342293	0.224	0.07	2.85275e-24	C05 - CD4+ Treg : TNFRSF9 ADT-4.1BB	SHMT2
ETFB	8.48842e-29	0.270013	0.442	0.243	3.83583e-24	C05 - CD4+ Treg : TNFRSF9 ADT-4.1BB	ETFB
TSPAN13	1.00639e-28	0.338455	0.12	0.019	4.54775e-24	C05 - CD4+ Treg : TNFRSF9 ADT-4.1BB	TSPAN13
KIF5B	1.12622e-28	0.389975	0.634	0.396	5.0893e-24	C05 - CD4+ Treg : TNFRSF9 ADT-4.1BB	KIF5B
UXS1	1.30039e-28	0.324156	0.285	0.112	5.87634e-24	C05 - CD4+ Treg : TNFRSF9 ADT-4.1BB	UXS1
UBE2Z	1.36574e-28	0.365371	0.339	0.15	6.17166e-24	C05 - CD4+ Treg : TNFRSF9 ADT-4.1BB	UBE2Z
TMEM154	1.37397e-28	0.343108	0.236	0.079	6.20883e-24	C05 - CD4+ Treg : TNFRSF9 ADT-4.1BB	TMEM154
DERL1	1.43542e-28	0.347144	0.474	0.259	6.4865e-24	C05 - CD4+ Treg : TNFRSF9 ADT-4.1BB	DERL1
PSMD2	1.67342e-28	0.363807	0.392	0.191	7.56202e-24	C05 - CD4+ Treg : TNFRSF9 ADT-4.1BB	PSMD2
STAT5A	1.91247e-28	0.350993	0.371	0.175	8.64228e-24	C05 - CD4+ Treg : TNFRSF9 ADT-4.1BB	STAT5A
CSK	2.50039e-28	0.428306	0.526	0.297	1.1299e-23	C05 - CD4+ Treg : TNFRSF9 ADT-4.1BB	CSK
COX6C	2.59832e-28	0.411678	0.835	0.629	1.17416e-23	C05 - CD4+ Treg : TNFRSF9 ADT-4.1BB	COX6C
TBCB	2.76726e-28	0.409666	0.549	0.317	1.2505e-23	C05 - CD4+ Treg : TNFRSF9 ADT-4.1BB	TBCB
CD82	3.01046e-28	0.381647	0.46	0.245	1.3604e-23	C05 - CD4+ Treg : TNFRSF9 ADT-4.1BB	CD82
ZNF281	3.15756e-28	0.428329	0.323	0.136	1.42687e-23	C05 - CD4+ Treg : TNFRSF9 ADT-4.1BB	ZNF281
CHST11	3.71026e-28	0.452621	0.493	0.268	1.67663e-23	C05 - CD4+ Treg : TNFRSF9 ADT-4.1BB	CHST11
SNX5	3.80559e-28	0.294131	0.417	0.222	1.71971e-23	C05 - CD4+ Treg : TNFRSF9 ADT-4.1BB	SNX5
MORF4L1	3.82009e-28	0.4363	0.797	0.585	1.72626e-23	C05 - CD4+ Treg : TNFRSF9 ADT-4.1BB	MORF4L1
ADRM1	3.9085e-28	0.394542	0.501	0.277	1.76621e-23	C05 - CD4+ Treg : TNFRSF9 ADT-4.1BB	ADRM1
EAPP	5.46957e-28	0.330456	0.354	0.166	2.47164e-23	C05 - CD4+ Treg : TNFRSF9 ADT-4.1BB	EAPP
PITPNA	6.64192e-28	0.285219	0.252	0.094	3.00142e-23	C05 - CD4+ Treg : TNFRSF9 ADT-4.1BB	PITPNA
C15orf61	6.97527e-28	0.330671	0.232	0.078	3.15206e-23	C05 - CD4+ Treg : TNFRSF9 ADT-4.1BB	C15orf61
PTEN	7.47887e-28	0.284222	0.377	0.191	3.37963e-23	C05 - CD4+ Treg : TNFRSF9 ADT-4.1BB	PTEN
HIBCH	7.85961e-28	0.341089	0.308	0.13	3.55168e-23	C05 - CD4+ Treg : TNFRSF9 ADT-4.1BB	HIBCH
CFAP20	8.42074e-28	0.493116	0.336	0.146	3.80525e-23	C05 - CD4+ Treg : TNFRSF9 ADT-4.1BB	CFAP20
XRCC6	8.6141e-28	0.314795	0.603	0.377	3.89263e-23	C05 - CD4+ Treg : TNFRSF9 ADT-4.1BB	XRCC6
ZNF280C	9.34578e-28	0.281032	0.158	0.038	4.22326e-23	C05 - CD4+ Treg : TNFRSF9 ADT-4.1BB	ZNF280C
USP47	9.45457e-28	0.396083	0.427	0.217	4.27243e-23	C05 - CD4+ Treg : TNFRSF9 ADT-4.1BB	USP47
MTMR6	1.03704e-27	0.341462	0.255	0.094	4.68626e-23	C05 - CD4+ Treg : TNFRSF9 ADT-4.1BB	MTMR6
NFE2L3	1.33037e-27	0.343193	0.175	0.045	6.01179e-23	C05 - CD4+ Treg : TNFRSF9 ADT-4.1BB	NFE2L3
CD58	1.61432e-27	0.385271	0.376	0.177	7.29494e-23	C05 - CD4+ Treg : TNFRSF9 ADT-4.1BB	CD58
SERPINB1	1.61722e-27	0.333911	0.486	0.272	7.30806e-23	C05 - CD4+ Treg : TNFRSF9 ADT-4.1BB	SERPINB1
EDF1	2.02519e-27	0.373355	0.87	0.679	9.15165e-23	C05 - CD4+ Treg : TNFRSF9 ADT-4.1BB	EDF1
TXNDC17	2.07432e-27	0.427798	0.473	0.254	9.37364e-23	C05 - CD4+ Treg : TNFRSF9 ADT-4.1BB	TXNDC17
ATP6V0B	2.30053e-27	0.320584	0.573	0.353	1.03959e-22	C05 - CD4+ Treg : TNFRSF9 ADT-4.1BB	ATP6V0B
NDUFA12	2.37605e-27	0.389579	0.509	0.287	1.07371e-22	C05 - CD4+ Treg : TNFRSF9 ADT-4.1BB	NDUFA12
MYO1G	3.03428e-27	0.283251	0.404	0.212	1.37116e-22	C05 - CD4+ Treg : TNFRSF9 ADT-4.1BB	MYO1G
CD3D1	3.34091e-27	0.370554	0.942	0.79	1.50972e-22	C05 - CD4+ Treg : TNFRSF9 ADT-4.1BB	CD3D
EMC6	3.37323e-27	0.29492	0.377	0.189	1.52433e-22	C05 - CD4+ Treg : TNFRSF9 ADT-4.1BB	EMC6
ACAA1	3.67969e-27	0.375881	0.344	0.154	1.66282e-22	C05 - CD4+ Treg : TNFRSF9 ADT-4.1BB	ACAA1
CSNK2B	3.72999e-27	0.340767	0.481	0.27	1.68555e-22	C05 - CD4+ Treg : TNFRSF9 ADT-4.1BB	CSNK2B
NME3	3.74879e-27	0.330377	0.499	0.285	1.69404e-22	C05 - CD4+ Treg : TNFRSF9 ADT-4.1BB	NME3
USP51	3.75416e-27	0.33848	0.11	0.017	1.69647e-22	C05 - CD4+ Treg : TNFRSF9 ADT-4.1BB	USP51
C19orf53	4.12995e-27	0.316521	0.702	0.476	1.86628e-22	C05 - CD4+ Treg : TNFRSF9 ADT-4.1BB	C19orf53
CAB39	4.38488e-27	0.290379	0.377	0.19	1.98148e-22	C05 - CD4+ Treg : TNFRSF9 ADT-4.1BB	CAB39
ANKRD10	5.35097e-27	0.43992	0.404	0.2	2.41805e-22	C05 - CD4+ Treg : TNFRSF9 ADT-4.1BB	ANKRD10
NINJ1	5.54432e-27	0.494867	0.371	0.175	2.50542e-22	C05 - CD4+ Treg : TNFRSF9 ADT-4.1BB	NINJ1
VTI1B	5.77579e-27	0.260995	0.298	0.132	2.61002e-22	C05 - CD4+ Treg : TNFRSF9 ADT-4.1BB	VTI1B
AP2S1	5.89118e-27	0.324089	0.42	0.223	2.66217e-22	C05 - CD4+ Treg : TNFRSF9 ADT-4.1BB	AP2S1
FCMR	6.06729e-27	0.319095	0.295	0.127	2.74175e-22	C05 - CD4+ Treg : TNFRSF9 ADT-4.1BB	FCMR
UQCR10	6.10787e-27	0.437533	0.667	0.438	2.76008e-22	C05 - CD4+ Treg : TNFRSF9 ADT-4.1BB	UQCR10
EIF6	6.70717e-27	0.369402	0.407	0.205	3.0309e-22	C05 - CD4+ Treg : TNFRSF9 ADT-4.1BB	EIF6
MDH1	6.71708e-27	0.351744	0.481	0.267	3.03538e-22	C05 - CD4+ Treg : TNFRSF9 ADT-4.1BB	MDH1
EGLN1	6.73361e-27	0.291724	0.236	0.086	3.04285e-22	C05 - CD4+ Treg : TNFRSF9 ADT-4.1BB	EGLN1
PXK	7.30037e-27	0.27803	0.193	0.059	3.29897e-22	C05 - CD4+ Treg : TNFRSF9 ADT-4.1BB	PXK
EIF3I	7.83499e-27	0.327712	0.563	0.342	3.54055e-22	C05 - CD4+ Treg : TNFRSF9 ADT-4.1BB	EIF3I
RRS1	8.31682e-27	0.310826	0.173	0.046	3.75829e-22	C05 - CD4+ Treg : TNFRSF9 ADT-4.1BB	RRS1
RNF7	8.83434e-27	0.328957	0.532	0.316	3.99215e-22	C05 - CD4+ Treg : TNFRSF9 ADT-4.1BB	RNF7
HSD17B10	9.13323e-27	0.344979	0.376	0.184	4.12722e-22	C05 - CD4+ Treg : TNFRSF9 ADT-4.1BB	HSD17B10
USP15	9.20023e-27	0.478309	0.674	0.446	4.15749e-22	C05 - CD4+ Treg : TNFRSF9 ADT-4.1BB	USP15
TMX1	9.25052e-27	0.301198	0.328	0.15	4.18022e-22	C05 - CD4+ Treg : TNFRSF9 ADT-4.1BB	TMX1
TMEM59	9.37633e-27	0.326	0.763	0.54	4.23707e-22	C05 - CD4+ Treg : TNFRSF9 ADT-4.1BB	TMEM59
DESI1	1.01049e-26	0.358116	0.287	0.114	4.56629e-22	C05 - CD4+ Treg : TNFRSF9 ADT-4.1BB	DESI1
BST2	1.02706e-26	0.364154	0.669	0.439	4.64119e-22	C05 - CD4+ Treg : TNFRSF9 ADT-4.1BB	BST2
PDIA6	1.03653e-26	0.444897	0.577	0.349	4.68396e-22	C05 - CD4+ Treg : TNFRSF9 ADT-4.1BB	PDIA6
FDPS	1.07846e-26	0.27613	0.405	0.216	4.87343e-22	C05 - CD4+ Treg : TNFRSF9 ADT-4.1BB	FDPS
ST13	1.2299e-26	0.434743	0.644	0.416	5.55781e-22	C05 - CD4+ Treg : TNFRSF9 ADT-4.1BB	ST13
DNAJC8	1.46021e-26	0.259092	0.53	0.324	6.59854e-22	C05 - CD4+ Treg : TNFRSF9 ADT-4.1BB	DNAJC8
NT5C	1.49994e-26	0.301762	0.397	0.207	6.77809e-22	C05 - CD4+ Treg : TNFRSF9 ADT-4.1BB	NT5C
PSAP	1.54308e-26	0.307397	0.446	0.245	6.97302e-22	C05 - CD4+ Treg : TNFRSF9 ADT-4.1BB	PSAP
PSMD4	1.56292e-26	0.280949	0.39	0.203	7.06267e-22	C05 - CD4+ Treg : TNFRSF9 ADT-4.1BB	PSMD4
CTNNB1	1.56385e-26	0.36379	0.455	0.247	7.0669e-22	C05 - CD4+ Treg : TNFRSF9 ADT-4.1BB	CTNNB1
ZNF706	1.62875e-26	0.447483	0.583	0.356	7.36015e-22	C05 - CD4+ Treg : TNFRSF9 ADT-4.1BB	ZNF706
TMEM50A	1.76097e-26	0.323082	0.712	0.488	7.95766e-22	C05 - CD4+ Treg : TNFRSF9 ADT-4.1BB	TMEM50A
PFDN2	1.79806e-26	0.356482	0.519	0.301	8.12524e-22	C05 - CD4+ Treg : TNFRSF9 ADT-4.1BB	PFDN2
ZBTB24	1.80144e-26	0.344807	0.217	0.072	8.14051e-22	C05 - CD4+ Treg : TNFRSF9 ADT-4.1BB	ZBTB24
RBX1	1.97839e-26	0.408817	0.606	0.378	8.94014e-22	C05 - CD4+ Treg : TNFRSF9 ADT-4.1BB	RBX1
COX7A2	2.00021e-26	0.377509	0.824	0.617	9.03877e-22	C05 - CD4+ Treg : TNFRSF9 ADT-4.1BB	COX7A2
TSPAN33	2.04411e-26	0.272789	0.11	0.018	9.23712e-22	C05 - CD4+ Treg : TNFRSF9 ADT-4.1BB	TSPAN33
SCP2	2.17819e-26	0.307245	0.516	0.304	9.84303e-22	C05 - CD4+ Treg : TNFRSF9 ADT-4.1BB	SCP2
HPSE	2.22379e-26	0.292092	0.137	0.028	1.00491e-21	C05 - CD4+ Treg : TNFRSF9 ADT-4.1BB	HPSE
NCK2	2.45627e-26	0.284568	0.496	0.292	1.10996e-21	C05 - CD4+ Treg : TNFRSF9 ADT-4.1BB	NCK2
PAPOLA	2.5529e-26	0.358376	0.684	0.456	1.15363e-21	C05 - CD4+ Treg : TNFRSF9 ADT-4.1BB	PAPOLA
CCT3	2.60252e-26	0.422414	0.643	0.414	1.17605e-21	C05 - CD4+ Treg : TNFRSF9 ADT-4.1BB	CCT3
SNX17	2.64044e-26	0.27702	0.348	0.17	1.19319e-21	C05 - CD4+ Treg : TNFRSF9 ADT-4.1BB	SNX17
ASB2	2.77571e-26	0.264435	0.133	0.027	1.25432e-21	C05 - CD4+ Treg : TNFRSF9 ADT-4.1BB	ASB2
CCT5	2.80672e-26	0.348056	0.471	0.263	1.26833e-21	C05 - CD4+ Treg : TNFRSF9 ADT-4.1BB	CCT5
RHOA	3.36709e-26	0.388503	0.824	0.628	1.52155e-21	C05 - CD4+ Treg : TNFRSF9 ADT-4.1BB	RHOA
CISD2	3.40555e-26	0.44964	0.346	0.158	1.53893e-21	C05 - CD4+ Treg : TNFRSF9 ADT-4.1BB	CISD2
SMS	3.75686e-26	0.49582	0.382	0.185	1.69769e-21	C05 - CD4+ Treg : TNFRSF9 ADT-4.1BB	SMS
DCP2	3.7645e-26	0.47248	0.377	0.181	1.70114e-21	C05 - CD4+ Treg : TNFRSF9 ADT-4.1BB	DCP2
NCOA1	4.11207e-26	0.349603	0.325	0.145	1.8582e-21	C05 - CD4+ Treg : TNFRSF9 ADT-4.1BB	NCOA1
CAP1	4.8567e-26	0.36408	0.636	0.41	2.19469e-21	C05 - CD4+ Treg : TNFRSF9 ADT-4.1BB	CAP1
CHMP5	5.75915e-26	0.312074	0.516	0.305	2.6025e-21	C05 - CD4+ Treg : TNFRSF9 ADT-4.1BB	CHMP5
MRPS34	5.94796e-26	0.307355	0.394	0.206	2.68782e-21	C05 - CD4+ Treg : TNFRSF9 ADT-4.1BB	MRPS34
PICALM	6.29748e-26	0.319075	0.323	0.148	2.84577e-21	C05 - CD4+ Treg : TNFRSF9 ADT-4.1BB	PICALM
MFHAS1	6.79515e-26	0.260019	0.25	0.101	3.07066e-21	C05 - CD4+ Treg : TNFRSF9 ADT-4.1BB	MFHAS1
SVBP	6.84397e-26	0.320014	0.245	0.09	3.09272e-21	C05 - CD4+ Treg : TNFRSF9 ADT-4.1BB	SVBP
DNAJA2	6.86538e-26	0.465346	0.504	0.287	3.1024e-21	C05 - CD4+ Treg : TNFRSF9 ADT-4.1BB	DNAJA2
NDUFB3	6.93007e-26	0.314366	0.465	0.263	3.13163e-21	C05 - CD4+ Treg : TNFRSF9 ADT-4.1BB	NDUFB3
APOBEC3C	7.01889e-26	0.392617	0.407	0.207	3.17177e-21	C05 - CD4+ Treg : TNFRSF9 ADT-4.1BB	APOBEC3C
IFI27L2	7.15451e-26	0.336745	0.473	0.266	3.23305e-21	C05 - CD4+ Treg : TNFRSF9 ADT-4.1BB	IFI27L2
TAP1	8.20662e-26	0.361378	0.623	0.4	3.70849e-21	C05 - CD4+ Treg : TNFRSF9 ADT-4.1BB	TAP1
MBIP	9.64922e-26	0.348156	0.211	0.068	4.36039e-21	C05 - CD4+ Treg : TNFRSF9 ADT-4.1BB	MBIP
PSME2	9.79382e-26	0.443412	0.791	0.587	4.42573e-21	C05 - CD4+ Treg : TNFRSF9 ADT-4.1BB	PSME2
WHSC1L1	1.0851e-25	0.67257	0.445	0.262	4.90347e-21	C05 - CD4+ Treg : TNFRSF9 ADT-4.1BB	WHSC1L1
CLIC1	1.13138e-25	0.421537	0.891	0.744	5.11258e-21	C05 - CD4+ Treg : TNFRSF9 ADT-4.1BB	CLIC1
CCT6A	1.21304e-25	0.268593	0.499	0.301	5.48162e-21	C05 - CD4+ Treg : TNFRSF9 ADT-4.1BB	CCT6A
CCM2	1.29462e-25	0.276001	0.377	0.194	5.85026e-21	C05 - CD4+ Treg : TNFRSF9 ADT-4.1BB	CCM2
WSB1	1.87487e-25	0.302265	0.768	0.556	8.47234e-21	C05 - CD4+ Treg : TNFRSF9 ADT-4.1BB	WSB1
DYNLRB1	1.89394e-25	0.388429	0.611	0.388	8.55851e-21	C05 - CD4+ Treg : TNFRSF9 ADT-4.1BB	DYNLRB1
SAMHD1	1.97147e-25	0.389599	0.458	0.254	8.90889e-21	C05 - CD4+ Treg : TNFRSF9 ADT-4.1BB	SAMHD1
ANP32B	2.02601e-25	0.254998	0.736	0.523	9.15534e-21	C05 - CD4+ Treg : TNFRSF9 ADT-4.1BB	ANP32B
GATA3	2.15629e-25	0.527723	0.484	0.271	9.74405e-21	C05 - CD4+ Treg : TNFRSF9 ADT-4.1BB	GATA3
PSMC4	2.23005e-25	0.314926	0.404	0.21	1.00774e-20	C05 - CD4+ Treg : TNFRSF9 ADT-4.1BB	PSMC4
PRPF40A	2.44124e-25	0.283036	0.544	0.341	1.10317e-20	C05 - CD4+ Treg : TNFRSF9 ADT-4.1BB	PRPF40A
YIPF3	2.46118e-25	0.259257	0.301	0.139	1.11218e-20	C05 - CD4+ Treg : TNFRSF9 ADT-4.1BB	YIPF3
IGF2R	2.73717e-25	0.266492	0.254	0.104	1.2369e-20	C05 - CD4+ Treg : TNFRSF9 ADT-4.1BB	IGF2R
MRFAP1	2.81628e-25	0.383639	0.59	0.369	1.27265e-20	C05 - CD4+ Treg : TNFRSF9 ADT-4.1BB	MRFAP1
PCED1B	3.06732e-25	0.329745	0.252	0.098	1.38609e-20	C05 - CD4+ Treg : TNFRSF9 ADT-4.1BB	PCED1B
PSMA7	3.29713e-25	0.382193	0.84	0.648	1.48994e-20	C05 - CD4+ Treg : TNFRSF9 ADT-4.1BB	PSMA7
SRPRA	3.41812e-25	0.320547	0.362	0.178	1.54461e-20	C05 - CD4+ Treg : TNFRSF9 ADT-4.1BB	SRPRA
MRPL20	3.58668e-25	0.271233	0.45	0.256	1.62079e-20	C05 - CD4+ Treg : TNFRSF9 ADT-4.1BB	MRPL20
FHL3	3.7636e-25	0.275353	0.175	0.05	1.70073e-20	C05 - CD4+ Treg : TNFRSF9 ADT-4.1BB	FHL3
AFTPH	4.01858e-25	0.290519	0.269	0.113	1.81595e-20	C05 - CD4+ Treg : TNFRSF9 ADT-4.1BB	AFTPH
XRCC5	4.47612e-25	0.364098	0.61	0.388	2.02271e-20	C05 - CD4+ Treg : TNFRSF9 ADT-4.1BB	XRCC5
HERC5	4.50779e-25	0.36424	0.252	0.098	2.03703e-20	C05 - CD4+ Treg : TNFRSF9 ADT-4.1BB	HERC5
GLUD1	5.13095e-25	0.38034	0.465	0.258	2.31863e-20	C05 - CD4+ Treg : TNFRSF9 ADT-4.1BB	GLUD1
PHLDA2	5.18183e-25	0.487374	0.254	0.097	2.34162e-20	C05 - CD4+ Treg : TNFRSF9 ADT-4.1BB	PHLDA2
PET100	6.64643e-25	0.275989	0.501	0.301	3.00346e-20	C05 - CD4+ Treg : TNFRSF9 ADT-4.1BB	PET100
REXO2	6.65103e-25	0.375211	0.349	0.166	3.00553e-20	C05 - CD4+ Treg : TNFRSF9 ADT-4.1BB	REXO2
ANAPC11	7.22093e-25	0.250935	0.465	0.274	3.26306e-20	C05 - CD4+ Treg : TNFRSF9 ADT-4.1BB	ANAPC11
ATP5E	7.32131e-25	0.555441	0.547	0.48	3.30843e-20	C05 - CD4+ Treg : TNFRSF9 ADT-4.1BB	ATP5E
STIP1	7.36574e-25	0.47247	0.465	0.257	3.32851e-20	C05 - CD4+ Treg : TNFRSF9 ADT-4.1BB	STIP1
TRPS1	7.63688e-25	0.342061	0.371	0.187	3.45103e-20	C05 - CD4+ Treg : TNFRSF9 ADT-4.1BB	TRPS1
MRPL52	7.67029e-25	0.307543	0.414	0.223	3.46613e-20	C05 - CD4+ Treg : TNFRSF9 ADT-4.1BB	MRPL52
PEBP1	7.82015e-25	0.299912	0.638	0.421	3.53385e-20	C05 - CD4+ Treg : TNFRSF9 ADT-4.1BB	PEBP1
PRDX3	1.01271e-24	0.262732	0.282	0.124	4.57632e-20	C05 - CD4+ Treg : TNFRSF9 ADT-4.1BB	PRDX3
HNRNPR	1.04531e-24	0.349629	0.529	0.316	4.72366e-20	C05 - CD4+ Treg : TNFRSF9 ADT-4.1BB	HNRNPR
SGPP1	1.25144e-24	0.262185	0.158	0.043	5.65514e-20	C05 - CD4+ Treg : TNFRSF9 ADT-4.1BB	SGPP1
LRPAP1	1.29202e-24	0.308041	0.493	0.29	5.8385e-20	C05 - CD4+ Treg : TNFRSF9 ADT-4.1BB	LRPAP1
PARP1	1.29816e-24	0.292745	0.4	0.215	5.86624e-20	C05 - CD4+ Treg : TNFRSF9 ADT-4.1BB	PARP1
SDHA	1.35234e-24	0.304492	0.339	0.165	6.11107e-20	C05 - CD4+ Treg : TNFRSF9 ADT-4.1BB	SDHA
2002-09-01	1.38416e-24	0.282585	0.445	0.251	6.25487e-20	C05 - CD4+ Treg : TNFRSF9 ADT-4.1BB	2002-09-01
CXorf21	1.52777e-24	0.33066	0.137	0.031	6.90386e-20	C05 - CD4+ Treg : TNFRSF9 ADT-4.1BB	CXorf21
RIOK3	1.66577e-24	0.27378	0.353	0.181	7.52745e-20	C05 - CD4+ Treg : TNFRSF9 ADT-4.1BB	RIOK3
SEC11A	1.80948e-24	0.280141	0.643	0.43	8.17688e-20	C05 - CD4+ Treg : TNFRSF9 ADT-4.1BB	SEC11A
MRPL51	1.99523e-24	0.315871	0.466	0.269	9.01622e-20	C05 - CD4+ Treg : TNFRSF9 ADT-4.1BB	MRPL51
CD320	2.16249e-24	0.33334	0.298	0.131	9.77207e-20	C05 - CD4+ Treg : TNFRSF9 ADT-4.1BB	CD320
UNC119	2.24237e-24	0.291514	0.236	0.09	1.0133e-19	C05 - CD4+ Treg : TNFRSF9 ADT-4.1BB	UNC119
NDUFAB1	2.29058e-24	0.322527	0.463	0.262	1.03509e-19	C05 - CD4+ Treg : TNFRSF9 ADT-4.1BB	NDUFAB1
RNF181	2.38689e-24	0.260836	0.387	0.208	1.07861e-19	C05 - CD4+ Treg : TNFRSF9 ADT-4.1BB	RNF181
CDR2	2.57106e-24	0.393362	0.315	0.14	1.16184e-19	C05 - CD4+ Treg : TNFRSF9 ADT-4.1BB	CDR2
ZFAND5	2.67761e-24	0.467915	0.72	0.508	1.20998e-19	C05 - CD4+ Treg : TNFRSF9 ADT-4.1BB	ZFAND5
PHKB	2.73383e-24	0.362107	0.282	0.12	1.23539e-19	C05 - CD4+ Treg : TNFRSF9 ADT-4.1BB	PHKB
MYO5A	2.88394e-24	0.287289	0.224	0.085	1.30323e-19	C05 - CD4+ Treg : TNFRSF9 ADT-4.1BB	MYO5A
TRIM69	2.89699e-24	0.279728	0.298	0.137	1.30912e-19	C05 - CD4+ Treg : TNFRSF9 ADT-4.1BB	TRIM69
GSPT11	3.13733e-24	0.280606	0.603	0.398	1.41773e-19	C05 - CD4+ Treg : TNFRSF9 ADT-4.1BB	GSPT1
CCNI	3.29162e-24	0.391811	0.895	0.743	1.48745e-19	C05 - CD4+ Treg : TNFRSF9 ADT-4.1BB	CCNI
UBE2K	3.43828e-24	0.308991	0.412	0.222	1.55372e-19	C05 - CD4+ Treg : TNFRSF9 ADT-4.1BB	UBE2K
TXNDC11	3.52777e-24	0.307325	0.242	0.095	1.59417e-19	C05 - CD4+ Treg : TNFRSF9 ADT-4.1BB	TXNDC11
LEPROT	4.35687e-24	0.299346	0.278	0.121	1.96883e-19	C05 - CD4+ Treg : TNFRSF9 ADT-4.1BB	LEPROT
ABI2	5.21572e-24	0.26642	0.203	0.071	2.35693e-19	C05 - CD4+ Treg : TNFRSF9 ADT-4.1BB	ABI2
CYC1	5.37093e-24	0.252021	0.341	0.176	2.42707e-19	C05 - CD4+ Treg : TNFRSF9 ADT-4.1BB	CYC1
CALU	5.48168e-24	0.265046	0.227	0.086	2.47711e-19	C05 - CD4+ Treg : TNFRSF9 ADT-4.1BB	CALU
CNST	5.78054e-24	0.283446	0.269	0.115	2.61217e-19	C05 - CD4+ Treg : TNFRSF9 ADT-4.1BB	CNST
HLA-DRA1	5.95961e-24	0.607761	0.618	0.4	2.69309e-19	C05 - CD4+ Treg : TNFRSF9 ADT-4.1BB	HLA-DRA
SNX3	5.96415e-24	0.335886	0.605	0.389	2.69514e-19	C05 - CD4+ Treg : TNFRSF9 ADT-4.1BB	SNX3
NUDC	6.02026e-24	0.395734	0.593	0.376	2.72049e-19	C05 - CD4+ Treg : TNFRSF9 ADT-4.1BB	NUDC
CAPNS1	6.09874e-24	0.300027	0.418	0.23	2.75596e-19	C05 - CD4+ Treg : TNFRSF9 ADT-4.1BB	CAPNS1
CPEB4	6.34234e-24	0.387451	0.306	0.138	2.86604e-19	C05 - CD4+ Treg : TNFRSF9 ADT-4.1BB	CPEB4
ALDH9A1	6.81619e-24	0.292594	0.293	0.131	3.08017e-19	C05 - CD4+ Treg : TNFRSF9 ADT-4.1BB	ALDH9A1
ARPC3	8.08422e-24	0.358896	0.895	0.748	3.65318e-19	C05 - CD4+ Treg : TNFRSF9 ADT-4.1BB	ARPC3
RORA2	8.17913e-24	0.301424	0.718	0.507	3.69607e-19	C05 - CD4+ Treg : TNFRSF9 ADT-4.1BB	RORA
ATP6V1G1	8.2952e-24	0.309836	0.796	0.591	3.74852e-19	C05 - CD4+ Treg : TNFRSF9 ADT-4.1BB	ATP6V1G1
THRAP3	1.00513e-23	0.290234	0.504	0.307	4.54207e-19	C05 - CD4+ Treg : TNFRSF9 ADT-4.1BB	THRAP3
HMGN1	1.03808e-23	0.253963	0.837	0.643	4.691e-19	C05 - CD4+ Treg : TNFRSF9 ADT-4.1BB	HMGN1
PDHB	1.1917e-23	0.257594	0.277	0.124	5.38518e-19	C05 - CD4+ Treg : TNFRSF9 ADT-4.1BB	PDHB
GPX4	1.21221e-23	0.376746	0.75	0.539	5.47784e-19	C05 - CD4+ Treg : TNFRSF9 ADT-4.1BB	GPX4
COX20	1.27474e-23	0.293541	0.443	0.252	5.76042e-19	C05 - CD4+ Treg : TNFRSF9 ADT-4.1BB	COX20
PSMA1	1.34505e-23	0.304765	0.583	0.375	6.07816e-19	C05 - CD4+ Treg : TNFRSF9 ADT-4.1BB	PSMA1
SPAG9	1.44034e-23	0.308196	0.455	0.261	6.50877e-19	C05 - CD4+ Treg : TNFRSF9 ADT-4.1BB	SPAG9
APBB1IP	1.44737e-23	0.356613	0.555	0.343	6.5405e-19	C05 - CD4+ Treg : TNFRSF9 ADT-4.1BB	APBB1IP
COX7A2L	1.45689e-23	0.397881	0.578	0.364	6.58354e-19	C05 - CD4+ Treg : TNFRSF9 ADT-4.1BB	COX7A2L
NDUFB5	1.5636e-23	0.269247	0.443	0.257	7.06575e-19	C05 - CD4+ Treg : TNFRSF9 ADT-4.1BB	NDUFB5
KAT2B	1.56685e-23	0.334668	0.224	0.081	7.08042e-19	C05 - CD4+ Treg : TNFRSF9 ADT-4.1BB	KAT2B
TMEM219	1.65898e-23	0.288706	0.432	0.245	7.49677e-19	C05 - CD4+ Treg : TNFRSF9 ADT-4.1BB	TMEM219
ZCRB1	1.67963e-23	0.258552	0.356	0.187	7.59008e-19	C05 - CD4+ Treg : TNFRSF9 ADT-4.1BB	ZCRB1
AHSA1	1.79187e-23	0.505537	0.624	0.416	8.09727e-19	C05 - CD4+ Treg : TNFRSF9 ADT-4.1BB	AHSA1
LCK	1.84856e-23	0.370574	0.758	0.554	8.35346e-19	C05 - CD4+ Treg : TNFRSF9 ADT-4.1BB	LCK
GCA	1.88714e-23	0.252125	0.171	0.053	8.52781e-19	C05 - CD4+ Treg : TNFRSF9 ADT-4.1BB	GCA
PSMD11	2.31388e-23	0.349295	0.376	0.191	1.04562e-18	C05 - CD4+ Treg : TNFRSF9 ADT-4.1BB	PSMD11
TMBIM4	2.33409e-23	0.250985	0.526	0.331	1.05475e-18	C05 - CD4+ Treg : TNFRSF9 ADT-4.1BB	TMBIM4
RB1CC1	2.76139e-23	0.279131	0.415	0.232	1.24784e-18	C05 - CD4+ Treg : TNFRSF9 ADT-4.1BB	RB1CC1
FERMT3	2.82791e-23	0.254925	0.443	0.257	1.2779e-18	C05 - CD4+ Treg : TNFRSF9 ADT-4.1BB	FERMT3
GCHFR	2.92432e-23	0.295545	0.353	0.18	1.32147e-18	C05 - CD4+ Treg : TNFRSF9 ADT-4.1BB	GCHFR
SDC4	3.05967e-23	0.383558	0.257	0.103	1.38263e-18	C05 - CD4+ Treg : TNFRSF9 ADT-4.1BB	SDC4
ROMO1	3.46469e-23	0.315444	0.463	0.269	1.56566e-18	C05 - CD4+ Treg : TNFRSF9 ADT-4.1BB	ROMO1
FAM89B	3.60318e-23	0.299783	0.494	0.298	1.62824e-18	C05 - CD4+ Treg : TNFRSF9 ADT-4.1BB	FAM89B
PAM	3.60874e-23	0.258452	0.176	0.056	1.63075e-18	C05 - CD4+ Treg : TNFRSF9 ADT-4.1BB	PAM
CAPZA2	3.92986e-23	0.298841	0.456	0.264	1.77587e-18	C05 - CD4+ Treg : TNFRSF9 ADT-4.1BB	CAPZA2
ATRX	4.29011e-23	0.267994	0.685	0.477	1.93866e-18	C05 - CD4+ Treg : TNFRSF9 ADT-4.1BB	ATRX
EXOSC1	4.4586e-23	0.284653	0.323	0.157	2.0148e-18	C05 - CD4+ Treg : TNFRSF9 ADT-4.1BB	EXOSC1
GNG2	4.6723e-23	0.446121	0.639	0.428	2.11137e-18	C05 - CD4+ Treg : TNFRSF9 ADT-4.1BB	GNG2
PPP1R7	5.05268e-23	0.324884	0.412	0.224	2.28325e-18	C05 - CD4+ Treg : TNFRSF9 ADT-4.1BB	PPP1R7
YPEL3	5.11975e-23	0.314803	0.519	0.317	2.31357e-18	C05 - CD4+ Treg : TNFRSF9 ADT-4.1BB	YPEL3
N4BP1	5.33768e-23	0.258721	0.461	0.277	2.41205e-18	C05 - CD4+ Treg : TNFRSF9 ADT-4.1BB	N4BP1
ZDHHC18	5.40798e-23	0.280626	0.259	0.111	2.44381e-18	C05 - CD4+ Treg : TNFRSF9 ADT-4.1BB	ZDHHC18
C19orf24	6.03521e-23	0.258675	0.417	0.239	2.72725e-18	C05 - CD4+ Treg : TNFRSF9 ADT-4.1BB	C19orf24
KDELR2	6.08654e-23	0.295818	0.427	0.24	2.75044e-18	C05 - CD4+ Treg : TNFRSF9 ADT-4.1BB	KDELR2
CHMP2B	6.44222e-23	0.336006	0.351	0.175	2.91117e-18	C05 - CD4+ Treg : TNFRSF9 ADT-4.1BB	CHMP2B
SPPL2A	6.85515e-23	0.250553	0.387	0.215	3.09777e-18	C05 - CD4+ Treg : TNFRSF9 ADT-4.1BB	SPPL2A
TRAM1	7.12643e-23	0.255903	0.47	0.283	3.22036e-18	C05 - CD4+ Treg : TNFRSF9 ADT-4.1BB	TRAM1
SEC61B	7.71894e-23	0.338398	0.784	0.584	3.48811e-18	C05 - CD4+ Treg : TNFRSF9 ADT-4.1BB	SEC61B
CUTA	7.86854e-23	0.386758	0.679	0.467	3.55571e-18	C05 - CD4+ Treg : TNFRSF9 ADT-4.1BB	CUTA
HADHA	7.87299e-23	0.343324	0.442	0.247	3.55773e-18	C05 - CD4+ Treg : TNFRSF9 ADT-4.1BB	HADHA
GRINA	1.01881e-22	0.266559	0.171	0.052	4.6039e-18	C05 - CD4+ Treg : TNFRSF9 ADT-4.1BB	GRINA
ISG20	1.12939e-22	0.328543	0.781	0.58	5.10361e-18	C05 - CD4+ Treg : TNFRSF9 ADT-4.1BB	ISG20
H2AFY	1.19292e-22	0.254609	0.478	0.292	5.39071e-18	C05 - CD4+ Treg : TNFRSF9 ADT-4.1BB	H2AFY
DDOST	1.30263e-22	0.294958	0.404	0.222	5.88643e-18	C05 - CD4+ Treg : TNFRSF9 ADT-4.1BB	DDOST
PSMC1	1.31455e-22	0.347443	0.381	0.197	5.94034e-18	C05 - CD4+ Treg : TNFRSF9 ADT-4.1BB	PSMC1
PSMB4	1.36117e-22	0.324415	0.458	0.265	6.15098e-18	C05 - CD4+ Treg : TNFRSF9 ADT-4.1BB	PSMB4
IKBKE	1.40009e-22	0.2515	0.201	0.072	6.32685e-18	C05 - CD4+ Treg : TNFRSF9 ADT-4.1BB	IKBKE
TXNDC12	1.42652e-22	0.280073	0.372	0.199	6.44629e-18	C05 - CD4+ Treg : TNFRSF9 ADT-4.1BB	TXNDC12
ATP5G1	1.48642e-22	0.333432	0.272	0.118	6.71696e-18	C05 - CD4+ Treg : TNFRSF9 ADT-4.1BB	ATP5G1
2006-09-01	1.62531e-22	0.35254	0.682	0.472	7.34463e-18	C05 - CD4+ Treg : TNFRSF9 ADT-4.1BB	2006-09-01
YWHAE	1.63488e-22	0.296519	0.557	0.355	7.38787e-18	C05 - CD4+ Treg : TNFRSF9 ADT-4.1BB	YWHAE
SGMS1	1.66417e-22	0.342939	0.245	0.098	7.52021e-18	C05 - CD4+ Treg : TNFRSF9 ADT-4.1BB	SGMS1
RASGRP1	1.72084e-22	0.300558	0.471	0.281	7.77629e-18	C05 - CD4+ Treg : TNFRSF9 ADT-4.1BB	RASGRP1
UBE2D3	1.8077e-22	0.349711	0.881	0.717	8.1688e-18	C05 - CD4+ Treg : TNFRSF9 ADT-4.1BB	UBE2D3
TMEM140	1.83855e-22	0.277541	0.173	0.055	8.30823e-18	C05 - CD4+ Treg : TNFRSF9 ADT-4.1BB	TMEM140
MDH2	2.27666e-22	0.279506	0.496	0.303	1.0288e-17	C05 - CD4+ Treg : TNFRSF9 ADT-4.1BB	MDH2
UBE2H	2.33056e-22	0.309794	0.43	0.242	1.05316e-17	C05 - CD4+ Treg : TNFRSF9 ADT-4.1BB	UBE2H
GMFG	2.72394e-22	0.304902	0.834	0.645	1.23092e-17	C05 - CD4+ Treg : TNFRSF9 ADT-4.1BB	GMFG
VMP1	2.72487e-22	0.361036	0.781	0.583	1.23134e-17	C05 - CD4+ Treg : TNFRSF9 ADT-4.1BB	VMP1
PBX4	2.72649e-22	0.28971	0.325	0.164	1.23207e-17	C05 - CD4+ Treg : TNFRSF9 ADT-4.1BB	PBX4
OPTN	3.08545e-22	0.344457	0.608	0.4	1.39428e-17	C05 - CD4+ Treg : TNFRSF9 ADT-4.1BB	OPTN
SKAP2	3.34355e-22	0.308414	0.237	0.094	1.51092e-17	C05 - CD4+ Treg : TNFRSF9 ADT-4.1BB	SKAP2
CCDC50	3.37214e-22	0.250905	0.231	0.095	1.52384e-17	C05 - CD4+ Treg : TNFRSF9 ADT-4.1BB	CCDC50
EIF3J	3.70736e-22	0.455928	0.516	0.313	1.67532e-17	C05 - CD4+ Treg : TNFRSF9 ADT-4.1BB	EIF3J
CSDE1	3.91717e-22	0.325085	0.677	0.469	1.77013e-17	C05 - CD4+ Treg : TNFRSF9 ADT-4.1BB	CSDE1
MVP	4.37906e-22	0.308645	0.329	0.162	1.97885e-17	C05 - CD4+ Treg : TNFRSF9 ADT-4.1BB	MVP
BCL10	4.4165e-22	0.294367	0.277	0.125	1.99577e-17	C05 - CD4+ Treg : TNFRSF9 ADT-4.1BB	BCL10
MT1E	4.44763e-22	0.339597	0.237	0.095	2.00984e-17	C05 - CD4+ Treg : TNFRSF9 ADT-4.1BB	MT1E
NFE2L21	4.73201e-22	0.486712	0.649	0.448	2.13835e-17	C05 - CD4+ Treg : TNFRSF9 ADT-4.1BB	NFE2L2
RNF114	5.26768e-22	0.291196	0.438	0.253	2.38041e-17	C05 - CD4+ Treg : TNFRSF9 ADT-4.1BB	RNF114
PPP4R2	5.49291e-22	0.345747	0.445	0.253	2.48219e-17	C05 - CD4+ Treg : TNFRSF9 ADT-4.1BB	PPP4R2
CCDC167	6.01225e-22	0.322876	0.387	0.21	2.71688e-17	C05 - CD4+ Treg : TNFRSF9 ADT-4.1BB	CCDC167
ZMAT2	6.13081e-22	0.31397	0.381	0.204	2.77045e-17	C05 - CD4+ Treg : TNFRSF9 ADT-4.1BB	ZMAT2
RAB33A	6.8231e-22	0.264667	0.155	0.044	3.08329e-17	C05 - CD4+ Treg : TNFRSF9 ADT-4.1BB	RAB33A
VDAC1	6.83045e-22	0.361562	0.539	0.335	3.08661e-17	C05 - CD4+ Treg : TNFRSF9 ADT-4.1BB	VDAC1
SRP9	6.97564e-22	0.2828	0.479	0.293	3.15222e-17	C05 - CD4+ Treg : TNFRSF9 ADT-4.1BB	SRP9
NDUFB4	7.18721e-22	0.348326	0.603	0.396	3.24783e-17	C05 - CD4+ Treg : TNFRSF9 ADT-4.1BB	NDUFB4
DR1	7.55675e-22	0.382794	0.402	0.216	3.41482e-17	C05 - CD4+ Treg : TNFRSF9 ADT-4.1BB	DR1
TRAF1	7.65777e-22	0.353053	0.349	0.175	3.46047e-17	C05 - CD4+ Treg : TNFRSF9 ADT-4.1BB	TRAF1
HPRT1	8.12642e-22	0.287943	0.328	0.164	3.67225e-17	C05 - CD4+ Treg : TNFRSF9 ADT-4.1BB	HPRT1
TAGLN21	9.21053e-22	0.346848	0.848	0.671	4.16215e-17	C05 - CD4+ Treg : TNFRSF9 ADT-4.1BB	TAGLN2
C1orf43	9.3425e-22	0.356282	0.455	0.261	4.22178e-17	C05 - CD4+ Treg : TNFRSF9 ADT-4.1BB	C1orf43
STAT1	1.01371e-21	0.313815	0.547	0.35	4.58084e-17	C05 - CD4+ Treg : TNFRSF9 ADT-4.1BB	STAT1
CSGALNACT2	1.1571e-21	0.382737	0.333	0.163	5.22884e-17	C05 - CD4+ Treg : TNFRSF9 ADT-4.1BB	CSGALNACT2
LPXN	1.36757e-21	0.285803	0.433	0.25	6.17991e-17	C05 - CD4+ Treg : TNFRSF9 ADT-4.1BB	LPXN
CEP55	1.44574e-21	0.296279	0.114	0.025	6.53316e-17	C05 - CD4+ Treg : TNFRSF9 ADT-4.1BB	CEP55
NSFL1C	1.47641e-21	0.269363	0.247	0.104	6.67173e-17	C05 - CD4+ Treg : TNFRSF9 ADT-4.1BB	NSFL1C
PTPN22	1.50091e-21	0.27932	0.629	0.427	6.78248e-17	C05 - CD4+ Treg : TNFRSF9 ADT-4.1BB	PTPN22
CCNDBP1	1.59826e-21	0.342759	0.46	0.267	7.22239e-17	C05 - CD4+ Treg : TNFRSF9 ADT-4.1BB	CCNDBP1
UQCRQ	1.60902e-21	0.304556	0.557	0.359	7.271e-17	C05 - CD4+ Treg : TNFRSF9 ADT-4.1BB	UQCRQ
FAM96A	1.67431e-21	0.251813	0.267	0.122	7.56603e-17	C05 - CD4+ Treg : TNFRSF9 ADT-4.1BB	FAM96A
ZDBF2	1.77767e-21	0.45825	0.239	0.096	8.03312e-17	C05 - CD4+ Treg : TNFRSF9 ADT-4.1BB	ZDBF2
SLC25A31	1.84451e-21	0.354314	0.848	0.681	8.33518e-17	C05 - CD4+ Treg : TNFRSF9 ADT-4.1BB	SLC25A3
CISD3	2.10895e-21	0.329908	0.272	0.12	9.53012e-17	C05 - CD4+ Treg : TNFRSF9 ADT-4.1BB	CISD3
EIF2AK1	2.16825e-21	0.269416	0.257	0.113	9.7981e-17	C05 - CD4+ Treg : TNFRSF9 ADT-4.1BB	EIF2AK1
COMT	2.40781e-21	0.294	0.32	0.156	1.08807e-16	C05 - CD4+ Treg : TNFRSF9 ADT-4.1BB	COMT
KDM4B	2.49086e-21	0.276547	0.203	0.076	1.12559e-16	C05 - CD4+ Treg : TNFRSF9 ADT-4.1BB	KDM4B
SUGT1	2.59351e-21	0.333904	0.476	0.283	1.17198e-16	C05 - CD4+ Treg : TNFRSF9 ADT-4.1BB	SUGT1
RTCB	2.62618e-21	0.254728	0.244	0.103	1.18674e-16	C05 - CD4+ Treg : TNFRSF9 ADT-4.1BB	RTCB
DDX6	2.67352e-21	0.324611	0.552	0.352	1.20814e-16	C05 - CD4+ Treg : TNFRSF9 ADT-4.1BB	DDX6
CCT4	2.73982e-21	0.343306	0.629	0.426	1.2381e-16	C05 - CD4+ Treg : TNFRSF9 ADT-4.1BB	CCT4
BLOC1S1	3.07322e-21	0.26445	0.596	0.401	1.38876e-16	C05 - CD4+ Treg : TNFRSF9 ADT-4.1BB	BLOC1S1
RNF213	3.25176e-21	0.350939	0.769	0.581	1.46944e-16	C05 - CD4+ Treg : TNFRSF9 ADT-4.1BB	RNF213
DNAJC15	3.31594e-21	0.259993	0.366	0.2	1.49844e-16	C05 - CD4+ Treg : TNFRSF9 ADT-4.1BB	DNAJC15
STAMBPL1	3.41903e-21	0.306152	0.204	0.075	1.54502e-16	C05 - CD4+ Treg : TNFRSF9 ADT-4.1BB	STAMBPL1
PRRG4	3.43149e-21	0.284843	0.135	0.035	1.55066e-16	C05 - CD4+ Treg : TNFRSF9 ADT-4.1BB	PRRG4
TPM3	3.77522e-21	0.362482	0.811	0.631	1.70598e-16	C05 - CD4+ Treg : TNFRSF9 ADT-4.1BB	TPM3
GABARAPL2	4.20686e-21	0.275257	0.596	0.397	1.90104e-16	C05 - CD4+ Treg : TNFRSF9 ADT-4.1BB	GABARAPL2
IP6K2	4.51735e-21	0.294672	0.338	0.173	2.04134e-16	C05 - CD4+ Treg : TNFRSF9 ADT-4.1BB	IP6K2
IRF4	4.58705e-21	0.264142	0.245	0.108	2.07284e-16	C05 - CD4+ Treg : TNFRSF9 ADT-4.1BB	IRF4
DBI	4.70871e-21	0.25637	0.682	0.487	2.12782e-16	C05 - CD4+ Treg : TNFRSF9 ADT-4.1BB	DBI
RAD21	4.74561e-21	0.263083	0.498	0.313	2.14449e-16	C05 - CD4+ Treg : TNFRSF9 ADT-4.1BB	RAD21
PRR13	6.05025e-21	0.283133	0.545	0.351	2.73405e-16	C05 - CD4+ Treg : TNFRSF9 ADT-4.1BB	PRR13
KDM2B	6.68029e-21	0.266705	0.221	0.09	3.01876e-16	C05 - CD4+ Treg : TNFRSF9 ADT-4.1BB	KDM2B
TNFRSF14	8.76072e-21	0.252673	0.491	0.311	3.95888e-16	C05 - CD4+ Treg : TNFRSF9 ADT-4.1BB	TNFRSF14
AHR	9.82218e-21	0.330687	0.402	0.227	4.43854e-16	C05 - CD4+ Treg : TNFRSF9 ADT-4.1BB	AHR
CLNK	9.86513e-21	0.305657	0.143	0.04	4.45795e-16	C05 - CD4+ Treg : TNFRSF9 ADT-4.1BB	CLNK
PSMD1	1.0541e-20	0.277378	0.285	0.135	4.76338e-16	C05 - CD4+ Treg : TNFRSF9 ADT-4.1BB	PSMD1
CD83	1.06507e-20	0.504466	0.463	0.272	4.81295e-16	C05 - CD4+ Treg : TNFRSF9 ADT-4.1BB	CD83
FBLN7	1.48136e-20	0.257732	0.194	0.073	6.69411e-16	C05 - CD4+ Treg : TNFRSF9 ADT-4.1BB	FBLN7
TOP1	1.53643e-20	0.354295	0.664	0.463	6.94297e-16	C05 - CD4+ Treg : TNFRSF9 ADT-4.1BB	TOP1
ATP2A2	2.12148e-20	0.253943	0.343	0.183	9.58675e-16	C05 - CD4+ Treg : TNFRSF9 ADT-4.1BB	ATP2A2
MAP2K3	2.13696e-20	0.361127	0.409	0.228	9.65669e-16	C05 - CD4+ Treg : TNFRSF9 ADT-4.1BB	MAP2K3
JTB	2.287e-20	0.289991	0.667	0.47	1.03347e-15	C05 - CD4+ Treg : TNFRSF9 ADT-4.1BB	JTB
LY6E	2.32481e-20	0.29075	0.75	0.559	1.05056e-15	C05 - CD4+ Treg : TNFRSF9 ADT-4.1BB	LY6E
SYF2	2.43019e-20	0.265064	0.623	0.426	1.09818e-15	C05 - CD4+ Treg : TNFRSF9 ADT-4.1BB	SYF2
UBE2R2	2.48447e-20	0.285152	0.354	0.19	1.12271e-15	C05 - CD4+ Treg : TNFRSF9 ADT-4.1BB	UBE2R2
REL1	2.48694e-20	0.477501	0.853	0.707	1.12382e-15	C05 - CD4+ Treg : TNFRSF9 ADT-4.1BB	REL
HNRNPK	2.92081e-20	0.33428	0.829	0.659	1.31988e-15	C05 - CD4+ Treg : TNFRSF9 ADT-4.1BB	HNRNPK
PPP2CA	3.14003e-20	0.296806	0.534	0.343	1.41895e-15	C05 - CD4+ Treg : TNFRSF9 ADT-4.1BB	PPP2CA
FKBP4	3.29607e-20	0.37618	0.399	0.22	1.48946e-15	C05 - CD4+ Treg : TNFRSF9 ADT-4.1BB	FKBP4
SSNA1	3.51536e-20	0.259223	0.432	0.259	1.58855e-15	C05 - CD4+ Treg : TNFRSF9 ADT-4.1BB	SSNA1
ARPC5	3.75314e-20	0.256363	0.568	0.383	1.696e-15	C05 - CD4+ Treg : TNFRSF9 ADT-4.1BB	ARPC5
ATP5A1	4.11219e-20	0.325958	0.341	0.178	1.85826e-15	C05 - CD4+ Treg : TNFRSF9 ADT-4.1BB	ATP5A1
STAT5B	4.20162e-20	0.259239	0.353	0.193	1.89867e-15	C05 - CD4+ Treg : TNFRSF9 ADT-4.1BB	STAT5B
SRPK2	4.35925e-20	0.251792	0.371	0.21	1.9699e-15	C05 - CD4+ Treg : TNFRSF9 ADT-4.1BB	SRPK2
PSMA3	4.36624e-20	0.253236	0.506	0.324	1.97306e-15	C05 - CD4+ Treg : TNFRSF9 ADT-4.1BB	PSMA3
CUL1	4.55742e-20	0.257223	0.249	0.112	2.05945e-15	C05 - CD4+ Treg : TNFRSF9 ADT-4.1BB	CUL1
PSMD14	4.56002e-20	0.272402	0.371	0.207	2.06063e-15	C05 - CD4+ Treg : TNFRSF9 ADT-4.1BB	PSMD14
ATP5F1E1	5.4577e-20	0.457577	0.43	0.407	2.46628e-15	C05 - CD4+ Treg : TNFRSF9 ADT-4.1BB	ATP5F1E
PRKAR1A	5.58709e-20	0.267513	0.455	0.279	2.52475e-15	C05 - CD4+ Treg : TNFRSF9 ADT-4.1BB	PRKAR1A
LINC00152	5.9529e-20	0.521039	0.405	0.227	2.69006e-15	C05 - CD4+ Treg : TNFRSF9 ADT-4.1BB	LINC00152
ZBED2	6.02025e-20	0.269184	0.122	0.031	2.72049e-15	C05 - CD4+ Treg : TNFRSF9 ADT-4.1BB	ZBED2
NDUFA1	6.13444e-20	0.266297	0.699	0.506	2.77209e-15	C05 - CD4+ Treg : TNFRSF9 ADT-4.1BB	NDUFA1
POLR2I	6.51803e-20	0.250865	0.321	0.169	2.94543e-15	C05 - CD4+ Treg : TNFRSF9 ADT-4.1BB	POLR2I
UQCRFS1	7.35711e-20	0.292223	0.446	0.267	3.3246e-15	C05 - CD4+ Treg : TNFRSF9 ADT-4.1BB	UQCRFS1
NPC2	7.96273e-20	0.275507	0.334	0.177	3.59828e-15	C05 - CD4+ Treg : TNFRSF9 ADT-4.1BB	NPC2
GPBP1	8.76796e-20	0.39521	0.835	0.685	3.96215e-15	C05 - CD4+ Treg : TNFRSF9 ADT-4.1BB	GPBP1
SNU13	9.3962e-20	0.310706	0.677	0.482	4.24605e-15	C05 - CD4+ Treg : TNFRSF9 ADT-4.1BB	SNU13
ZNHIT1	1.00212e-19	0.274867	0.435	0.261	4.5285e-15	C05 - CD4+ Treg : TNFRSF9 ADT-4.1BB	ZNHIT1
CORO1A	1.05838e-19	0.350022	0.906	0.784	4.78273e-15	C05 - CD4+ Treg : TNFRSF9 ADT-4.1BB	CORO1A
LACTB	1.06072e-19	0.264461	0.199	0.077	4.79328e-15	C05 - CD4+ Treg : TNFRSF9 ADT-4.1BB	LACTB
RGS10	1.09556e-19	0.295954	0.662	0.468	4.95073e-15	C05 - CD4+ Treg : TNFRSF9 ADT-4.1BB	RGS10
ASXL1	1.10019e-19	0.30648	0.399	0.226	4.97165e-15	C05 - CD4+ Treg : TNFRSF9 ADT-4.1BB	ASXL1
UFC1	1.51835e-19	0.344462	0.598	0.402	6.86126e-15	C05 - CD4+ Treg : TNFRSF9 ADT-4.1BB	UFC1
GNPTAB	1.53361e-19	0.296238	0.297	0.148	6.93024e-15	C05 - CD4+ Treg : TNFRSF9 ADT-4.1BB	GNPTAB
DFNB31	1.5476e-19	0.253887	0.168	0.058	6.99343e-15	C05 - CD4+ Treg : TNFRSF9 ADT-4.1BB	DFNB31
CLTB	1.72641e-19	0.250806	0.463	0.287	7.80146e-15	C05 - CD4+ Treg : TNFRSF9 ADT-4.1BB	CLTB
BOLA3	1.85442e-19	0.252551	0.3	0.152	8.37993e-15	C05 - CD4+ Treg : TNFRSF9 ADT-4.1BB	BOLA3
PHB	2.15941e-19	0.264116	0.386	0.22	9.75816e-15	C05 - CD4+ Treg : TNFRSF9 ADT-4.1BB	PHB
ACTA2	2.35544e-19	0.275012	0.216	0.088	1.0644e-14	C05 - CD4+ Treg : TNFRSF9 ADT-4.1BB	ACTA2
SMC5	2.38862e-19	0.286165	0.376	0.212	1.07939e-14	C05 - CD4+ Treg : TNFRSF9 ADT-4.1BB	SMC5
POLR2E	2.44976e-19	0.276083	0.359	0.199	1.10702e-14	C05 - CD4+ Treg : TNFRSF9 ADT-4.1BB	POLR2E
TSPAN14	2.69196e-19	0.267349	0.379	0.216	1.21647e-14	C05 - CD4+ Treg : TNFRSF9 ADT-4.1BB	TSPAN14
COX6B1	2.96304e-19	0.292171	0.783	0.599	1.33897e-14	C05 - CD4+ Treg : TNFRSF9 ADT-4.1BB	COX6B1
GHITM	5.72322e-19	0.296009	0.547	0.359	2.58627e-14	C05 - CD4+ Treg : TNFRSF9 ADT-4.1BB	GHITM
JOSD1	6.51098e-19	0.274539	0.504	0.325	2.94225e-14	C05 - CD4+ Treg : TNFRSF9 ADT-4.1BB	JOSD1
ARF1	6.64256e-19	0.327497	0.753	0.569	3.00171e-14	C05 - CD4+ Treg : TNFRSF9 ADT-4.1BB	ARF1
MTDH	6.94787e-19	0.28223	0.638	0.448	3.13967e-14	C05 - CD4+ Treg : TNFRSF9 ADT-4.1BB	MTDH
RTF1	7.07183e-19	0.27636	0.442	0.269	3.19569e-14	C05 - CD4+ Treg : TNFRSF9 ADT-4.1BB	RTF1
FMNL1	7.9332e-19	0.355277	0.585	0.393	3.58494e-14	C05 - CD4+ Treg : TNFRSF9 ADT-4.1BB	FMNL1
TMF1	7.94835e-19	0.29073	0.47	0.292	3.59178e-14	C05 - CD4+ Treg : TNFRSF9 ADT-4.1BB	TMF1
SQRDL	8.16459e-19	0.257882	0.198	0.078	3.68949e-14	C05 - CD4+ Treg : TNFRSF9 ADT-4.1BB	SQRDL
MX1	8.58911e-19	0.287578	0.344	0.188	3.88133e-14	C05 - CD4+ Treg : TNFRSF9 ADT-4.1BB	MX1
LYRM4	1.00514e-18	0.298793	0.203	0.079	4.54211e-14	C05 - CD4+ Treg : TNFRSF9 ADT-4.1BB	LYRM4
ACTR3	1.15125e-18	0.374208	0.695	0.511	5.20237e-14	C05 - CD4+ Treg : TNFRSF9 ADT-4.1BB	ACTR3
HNRNPH3	1.23972e-18	0.284145	0.593	0.407	5.60216e-14	C05 - CD4+ Treg : TNFRSF9 ADT-4.1BB	HNRNPH3
DEDD2	1.31716e-18	0.372313	0.585	0.394	5.95211e-14	C05 - CD4+ Treg : TNFRSF9 ADT-4.1BB	DEDD2
TPR	1.36074e-18	0.305076	0.565	0.379	6.14906e-14	C05 - CD4+ Treg : TNFRSF9 ADT-4.1BB	TPR
HLA-F	1.78784e-18	0.265069	0.779	0.6	8.07908e-14	C05 - CD4+ Treg : TNFRSF9 ADT-4.1BB	HLA-F
HOXB2	2.09317e-18	0.294961	0.226	0.098	9.45883e-14	C05 - CD4+ Treg : TNFRSF9 ADT-4.1BB	HOXB2
TTC39C	2.30963e-18	0.360294	0.484	0.302	1.0437e-13	C05 - CD4+ Treg : TNFRSF9 ADT-4.1BB	TTC39C
MRPL1	2.71965e-18	0.28328	0.381	0.22	1.22898e-13	C05 - CD4+ Treg : TNFRSF9 ADT-4.1BB	MRPL1
HLA-E	2.74392e-18	0.281727	0.982	0.945	1.23995e-13	C05 - CD4+ Treg : TNFRSF9 ADT-4.1BB	HLA-E
OS9	3.35415e-18	0.26651	0.323	0.173	1.51571e-13	C05 - CD4+ Treg : TNFRSF9 ADT-4.1BB	OS9
ATP5G3	3.3659e-18	0.361043	0.382	0.215	1.52101e-13	C05 - CD4+ Treg : TNFRSF9 ADT-4.1BB	ATP5G3
ATP5J2	4.26091e-18	0.318413	0.333	0.177	1.92546e-13	C05 - CD4+ Treg : TNFRSF9 ADT-4.1BB	ATP5J2
ITPA	5.26692e-18	0.251618	0.306	0.16	2.38007e-13	C05 - CD4+ Treg : TNFRSF9 ADT-4.1BB	ITPA
EIF3H	7.39872e-18	0.354271	0.75	0.573	3.34341e-13	C05 - CD4+ Treg : TNFRSF9 ADT-4.1BB	EIF3H
SLC16A1	7.60635e-18	0.305108	0.326	0.173	3.43723e-13	C05 - CD4+ Treg : TNFRSF9 ADT-4.1BB	SLC16A1
PSMB5	7.80957e-18	0.281703	0.29	0.146	3.52907e-13	C05 - CD4+ Treg : TNFRSF9 ADT-4.1BB	PSMB5
HSPD11	7.90776e-18	0.586383	0.797	0.662	3.57344e-13	C05 - CD4+ Treg : TNFRSF9 ADT-4.1BB	HSPD1
MRPL33	8.32002e-18	0.300523	0.479	0.302	3.75974e-13	C05 - CD4+ Treg : TNFRSF9 ADT-4.1BB	MRPL33
TMEM208	1.19039e-17	0.274537	0.333	0.18	5.37924e-13	C05 - CD4+ Treg : TNFRSF9 ADT-4.1BB	TMEM208
CTSS	1.23842e-17	0.265835	0.465	0.294	5.5963e-13	C05 - CD4+ Treg : TNFRSF9 ADT-4.1BB	CTSS
NETO2	2.04144e-17	0.265042	0.143	0.046	9.22505e-13	C05 - CD4+ Treg : TNFRSF9 ADT-4.1BB	NETO2
POP5	2.06979e-17	0.253054	0.272	0.137	9.3532e-13	C05 - CD4+ Treg : TNFRSF9 ADT-4.1BB	POP5
TARS	2.25586e-17	0.256652	0.26	0.128	1.0194e-12	C05 - CD4+ Treg : TNFRSF9 ADT-4.1BB	TARS
LAMTOR2	2.82816e-17	0.277284	0.359	0.204	1.27802e-12	C05 - CD4+ Treg : TNFRSF9 ADT-4.1BB	LAMTOR2
AC058791.11	2.83866e-17	0.322513	0.593	0.411	1.28276e-12	C05 - CD4+ Treg : TNFRSF9 ADT-4.1BB	AC058791.1
TMBIM6	3.0503e-17	0.28	0.847	0.69	1.3784e-12	C05 - CD4+ Treg : TNFRSF9 ADT-4.1BB	TMBIM6
NDUFB11	3.07938e-17	0.305433	0.685	0.503	1.39154e-12	C05 - CD4+ Treg : TNFRSF9 ADT-4.1BB	NDUFB11
PSMD6	3.53126e-17	0.296037	0.321	0.171	1.59574e-12	C05 - CD4+ Treg : TNFRSF9 ADT-4.1BB	PSMD6
CYBA	3.58964e-17	0.260674	0.956	0.864	1.62212e-12	C05 - CD4+ Treg : TNFRSF9 ADT-4.1BB	CYBA
FXR1	3.74728e-17	0.303262	0.471	0.298	1.69336e-12	C05 - CD4+ Treg : TNFRSF9 ADT-4.1BB	FXR1
PIK3CA	4.05272e-17	0.273193	0.204	0.086	1.83138e-12	C05 - CD4+ Treg : TNFRSF9 ADT-4.1BB	PIK3CA
COQ10B	4.40531e-17	0.27744	0.473	0.303	1.99072e-12	C05 - CD4+ Treg : TNFRSF9 ADT-4.1BB	COQ10B
SDE2	4.55302e-17	0.282293	0.26	0.127	2.05747e-12	C05 - CD4+ Treg : TNFRSF9 ADT-4.1BB	SDE2
PRMT1	4.99621e-17	0.274126	0.404	0.244	2.25774e-12	C05 - CD4+ Treg : TNFRSF9 ADT-4.1BB	PRMT1
MRPL18	5.25305e-17	0.335605	0.563	0.383	2.3738e-12	C05 - CD4+ Treg : TNFRSF9 ADT-4.1BB	MRPL18
NME1	5.33701e-17	0.298484	0.213	0.091	2.41174e-12	C05 - CD4+ Treg : TNFRSF9 ADT-4.1BB	NME1
RAC2	6.01102e-17	0.289247	0.835	0.676	2.71632e-12	C05 - CD4+ Treg : TNFRSF9 ADT-4.1BB	RAC2
AHCYL1	8.09813e-17	0.256424	0.241	0.113	3.65946e-12	C05 - CD4+ Treg : TNFRSF9 ADT-4.1BB	AHCYL1
CDC42	8.23751e-17	0.315518	0.811	0.651	3.72245e-12	C05 - CD4+ Treg : TNFRSF9 ADT-4.1BB	CDC42
CD51	9.75146e-17	0.27748	0.349	0.199	4.40659e-12	C05 - CD4+ Treg : TNFRSF9 ADT-4.1BB	CD5
TMOD3	1.07229e-16	0.259128	0.372	0.219	4.84558e-12	C05 - CD4+ Treg : TNFRSF9 ADT-4.1BB	TMOD3
ATPIF1	1.09115e-16	0.44672	0.395	0.234	4.93078e-12	C05 - CD4+ Treg : TNFRSF9 ADT-4.1BB	ATPIF1
FAM107B2	1.34226e-16	0.283121	0.776	0.608	6.06552e-12	C05 - CD4+ Treg : TNFRSF9 ADT-4.1BB	FAM107B
SESTD1	1.483e-16	0.254687	0.119	0.034	6.70151e-12	C05 - CD4+ Treg : TNFRSF9 ADT-4.1BB	SESTD1
MRPL32	1.68701e-16	0.253388	0.315	0.173	7.62341e-12	C05 - CD4+ Treg : TNFRSF9 ADT-4.1BB	MRPL32
CYTOR	1.76099e-16	0.60821	0.338	0.189	7.95775e-12	C05 - CD4+ Treg : TNFRSF9 ADT-4.1BB	CYTOR
ZCCHC6	1.81813e-16	0.320944	0.241	0.112	8.21593e-12	C05 - CD4+ Treg : TNFRSF9 ADT-4.1BB	ZCCHC6
ARPC2	1.84899e-16	0.280456	0.916	0.797	8.35541e-12	C05 - CD4+ Treg : TNFRSF9 ADT-4.1BB	ARPC2
RNGTT	2.0303e-16	0.263035	0.239	0.114	9.17471e-12	C05 - CD4+ Treg : TNFRSF9 ADT-4.1BB	RNGTT
TCEB2	2.47218e-16	0.443175	0.44	0.283	1.11715e-11	C05 - CD4+ Treg : TNFRSF9 ADT-4.1BB	TCEB2
MIEN1	2.96677e-16	0.317315	0.341	0.189	1.34065e-11	C05 - CD4+ Treg : TNFRSF9 ADT-4.1BB	MIEN1
C21orf91	3.44441e-16	0.276214	0.27	0.136	1.55649e-11	C05 - CD4+ Treg : TNFRSF9 ADT-4.1BB	C21orf91
CHORDC1	4.59725e-16	0.458798	0.596	0.426	2.07745e-11	C05 - CD4+ Treg : TNFRSF9 ADT-4.1BB	CHORDC1
PTPRC1	4.90974e-16	0.290841	0.965	0.911	2.21866e-11	C05 - CD4+ Treg : TNFRSF9 ADT-4.1BB	PTPRC
STARD7	4.93851e-16	0.286125	0.321	0.177	2.23166e-11	C05 - CD4+ Treg : TNFRSF9 ADT-4.1BB	STARD7
AKTIP	5.3181e-16	0.250179	0.229	0.107	2.4032e-11	C05 - CD4+ Treg : TNFRSF9 ADT-4.1BB	AKTIP
C11orf31	5.93486e-16	0.258714	0.334	0.195	2.6819e-11	C05 - CD4+ Treg : TNFRSF9 ADT-4.1BB	C11orf31
CXCR3	6.93307e-16	0.273427	0.371	0.221	3.13299e-11	C05 - CD4+ Treg : TNFRSF9 ADT-4.1BB	CXCR3
ARID4A	7.32293e-16	0.260817	0.42	0.264	3.30916e-11	C05 - CD4+ Treg : TNFRSF9 ADT-4.1BB	ARID4A
RELB	1.03778e-15	0.250535	0.353	0.206	4.68961e-11	C05 - CD4+ Treg : TNFRSF9 ADT-4.1BB	RELB
SLC39A1	1.20961e-15	0.265209	0.213	0.095	5.46609e-11	C05 - CD4+ Treg : TNFRSF9 ADT-4.1BB	SLC39A1
B3GNT2	1.25142e-15	0.251412	0.287	0.152	5.65504e-11	C05 - CD4+ Treg : TNFRSF9 ADT-4.1BB	B3GNT2
IL4R	1.34683e-15	0.281499	0.297	0.158	6.08618e-11	C05 - CD4+ Treg : TNFRSF9 ADT-4.1BB	IL4R
HIST1H2BN	1.7506e-15	0.266509	0.175	0.072	7.91079e-11	C05 - CD4+ Treg : TNFRSF9 ADT-4.1BB	HIST1H2BN
IRS21	2.67288e-15	0.283571	0.409	0.254	1.20785e-10	C05 - CD4+ Treg : TNFRSF9 ADT-4.1BB	IRS2
CTD-2020K17.1	3.79004e-15	0.340707	0.262	0.132	1.71268e-10	C05 - CD4+ Treg : TNFRSF9 ADT-4.1BB	CTD-2020K17.1
ATP5D	4.15286e-15	0.294295	0.414	0.258	1.87663e-10	C05 - CD4+ Treg : TNFRSF9 ADT-4.1BB	ATP5D
MAPK1IP1L	5.56949e-15	0.271448	0.4	0.248	2.5168e-10	C05 - CD4+ Treg : TNFRSF9 ADT-4.1BB	MAPK1IP1L
SDF2L1	8.57469e-15	0.251274	0.341	0.203	3.87482e-10	C05 - CD4+ Treg : TNFRSF9 ADT-4.1BB	SDF2L1
ATP5B	3.1384e-14	0.257842	0.402	0.256	1.41821e-09	C05 - CD4+ Treg : TNFRSF9 ADT-4.1BB	ATP5B
BRI3	3.46034e-14	0.269299	0.399	0.25	1.5637e-09	C05 - CD4+ Treg : TNFRSF9 ADT-4.1BB	BRI3
IFIH1	4.73412e-14	0.252904	0.196	0.088	2.1393e-09	C05 - CD4+ Treg : TNFRSF9 ADT-4.1BB	IFIH1
TOR1AIP2	5.17087e-14	0.319162	0.288	0.156	2.33666e-09	C05 - CD4+ Treg : TNFRSF9 ADT-4.1BB	TOR1AIP2
AKR7A2	6.15922e-14	0.263552	0.249	0.128	2.78329e-09	C05 - CD4+ Treg : TNFRSF9 ADT-4.1BB	AKR7A2
RBM17	6.18512e-14	0.259071	0.423	0.274	2.79499e-09	C05 - CD4+ Treg : TNFRSF9 ADT-4.1BB	RBM17
TRBC21	6.5441e-14	0.3278	0.86	0.725	2.95721e-09	C05 - CD4+ Treg : TNFRSF9 ADT-4.1BB	TRBC2
ANXA111	7.24098e-14	0.278806	0.519	0.359	3.27213e-09	C05 - CD4+ Treg : TNFRSF9 ADT-4.1BB	ANXA11
ANXA6	1.45664e-13	0.311474	0.511	0.352	6.58242e-09	C05 - CD4+ Treg : TNFRSF9 ADT-4.1BB	ANXA6
ETHE1	2.10904e-13	0.254193	0.315	0.183	9.53055e-09	C05 - CD4+ Treg : TNFRSF9 ADT-4.1BB	ETHE1
SERPINH1	2.51996e-13	0.2734	0.216	0.107	1.13874e-08	C05 - CD4+ Treg : TNFRSF9 ADT-4.1BB	SERPINH1
UQCRB	2.59677e-13	0.257562	0.904	0.794	1.17346e-08	C05 - CD4+ Treg : TNFRSF9 ADT-4.1BB	UQCRB
HNRNPM	2.69114e-13	0.261703	0.593	0.434	1.2161e-08	C05 - CD4+ Treg : TNFRSF9 ADT-4.1BB	HNRNPM
ALDOA	4.17912e-13	0.365764	0.539	0.382	1.8885e-08	C05 - CD4+ Treg : TNFRSF9 ADT-4.1BB	ALDOA
ATP5IF1	5.47356e-13	0.475426	0.359	0.237	2.47345e-08	C05 - CD4+ Treg : TNFRSF9 ADT-4.1BB	ATP5IF1
NEAT1	5.55419e-13	0.344172	0.97	0.932	2.50989e-08	C05 - CD4+ Treg : TNFRSF9 ADT-4.1BB	NEAT1
OTUD1	5.96603e-13	0.26774	0.185	0.084	2.69599e-08	C05 - CD4+ Treg : TNFRSF9 ADT-4.1BB	OTUD1
DGKE	6.69246e-13	0.305179	0.18	0.08	3.02425e-08	C05 - CD4+ Treg : TNFRSF9 ADT-4.1BB	DGKE
BTG11	1.17102e-12	0.278274	0.997	0.986	5.29171e-08	C05 - CD4+ Treg : TNFRSF9 ADT-4.1BB	BTG1
HSPH12	1.17695e-12	0.291702	0.812	0.68	5.31851e-08	C05 - CD4+ Treg : TNFRSF9 ADT-4.1BB	HSPH1
AC008105.3	1.47524e-12	0.349195	0.193	0.09	6.66646e-08	C05 - CD4+ Treg : TNFRSF9 ADT-4.1BB	AC008105.3
CCL202	3.81622e-12	0.548197	0.157	0.067	1.72451e-07	C05 - CD4+ Treg : TNFRSF9 ADT-4.1BB	CCL20
SLC3A2	3.99322e-12	0.312742	0.601	0.449	1.8045e-07	C05 - CD4+ Treg : TNFRSF9 ADT-4.1BB	SLC3A2
HLA-DQA21	5.17276e-12	0.298021	0.198	0.097	2.33752e-07	C05 - CD4+ Treg : TNFRSF9 ADT-4.1BB	HLA-DQA2
UBALD2	6.53097e-12	0.266629	0.618	0.467	2.95128e-07	C05 - CD4+ Treg : TNFRSF9 ADT-4.1BB	UBALD2
GNAS	6.76977e-12	0.269666	0.903	0.813	3.05919e-07	C05 - CD4+ Treg : TNFRSF9 ADT-4.1BB	GNAS
ATP5F1A	1.02729e-11	0.272368	0.245	0.133	4.64221e-07	C05 - CD4+ Treg : TNFRSF9 ADT-4.1BB	ATP5F1A
PGM2L1	1.37192e-11	0.359456	0.282	0.162	6.19956e-07	C05 - CD4+ Treg : TNFRSF9 ADT-4.1BB	PGM2L1
SHFM1	1.8059e-11	0.251565	0.346	0.221	8.16067e-07	C05 - CD4+ Treg : TNFRSF9 ADT-4.1BB	SHFM1
TRBC1	3.09165e-11	0.580398	0.626	0.514	1.39709e-06	C05 - CD4+ Treg : TNFRSF9 ADT-4.1BB	TRBC1
RP11-138A9.1	5.24206e-11	0.294494	0.395	0.262	2.36883e-06	C05 - CD4+ Treg : TNFRSF9 ADT-4.1BB	RP11-138A9.1
ATP5MC3	1.77982e-10	0.410782	0.323	0.216	8.04285e-06	C05 - CD4+ Treg : TNFRSF9 ADT-4.1BB	ATP5MC3
NFKB2	3.02897e-10	0.283039	0.456	0.322	1.36876e-05	C05 - CD4+ Treg : TNFRSF9 ADT-4.1BB	NFKB2
ELOB	3.86951e-10	0.388672	0.399	0.304	1.74859e-05	C05 - CD4+ Treg : TNFRSF9 ADT-4.1BB	ELOB
NT5C3A	4.2025e-10	0.290904	0.321	0.203	1.89907e-05	C05 - CD4+ Treg : TNFRSF9 ADT-4.1BB	NT5C3A
TIFA	5.77241e-10	0.264963	0.242	0.139	2.6085e-05	C05 - CD4+ Treg : TNFRSF9 ADT-4.1BB	TIFA
FAM46C1	8.30907e-10	0.254207	0.364	0.243	3.75478e-05	C05 - CD4+ Treg : TNFRSF9 ADT-4.1BB	FAM46C
HSP90AB11	1.09236e-09	0.278266	0.96	0.912	4.93627e-05	C05 - CD4+ Treg : TNFRSF9 ADT-4.1BB	HSP90AB1
ATP5G2	1.25218e-09	0.360586	0.489	0.382	5.65847e-05	C05 - CD4+ Treg : TNFRSF9 ADT-4.1BB	ATP5G2
AHNAK1	1.77184e-09	0.254616	0.7	0.57	8.00678e-05	C05 - CD4+ Treg : TNFRSF9 ADT-4.1BB	AHNAK
PPP1R2	7.47575e-08	0.277438	0.689	0.577	0.00337821	C05 - CD4+ Treg : TNFRSF9 ADT-4.1BB	PPP1R2
EMP3	7.74104e-08	0.258007	0.687	0.57	0.0034981	C05 - CD4+ Treg : TNFRSF9 ADT-4.1BB	EMP3
HSPE11	1.97494e-07	0.254249	0.84	0.758	0.00892454	C05 - CD4+ Treg : TNFRSF9 ADT-4.1BB	HSPE1
ATP5MF	6.46988e-07	0.295066	0.277	0.19	0.0292367	C05 - CD4+ Treg : TNFRSF9 ADT-4.1BB	ATP5MF
ATP5MC1	8.65041e-07	0.273276	0.211	0.131	0.0390904	C05 - CD4+ Treg : TNFRSF9 ADT-4.1BB	ATP5MC1
HLA-DRB51	7.24672e-05	0.301998	0.27	0.196	1	C05 - CD4+ Treg : TNFRSF9 ADT-4.1BB	HLA-DRB5
NSD31	0.000142449	0.284184	0.308	0.236	1	C05 - CD4+ Treg : TNFRSF9 ADT-4.1BB	NSD3
PCNX4	0.000204347	0.291113	0.14	0.089	1	C05 - CD4+ Treg : TNFRSF9 ADT-4.1BB	PCNX4
CXCL13	0	4.74475	0.808	0.039	0	C06 - CD4+ Tfh : CXCL13 ADT-PD1	CXCL13
NR3C1	1.00317e-220	1.77647	0.884	0.413	4.53323e-216	C06 - CD4+ Tfh : CXCL13 ADT-PD1	NR3C1
IGFL2	3.08575e-192	1.81873	0.38	0.004	1.39442e-187	C06 - CD4+ Tfh : CXCL13 ADT-PD1	IGFL2
NMB	1.49157e-175	2.72381	0.528	0.084	6.74026e-171	C06 - CD4+ Tfh : CXCL13 ADT-PD1	NMB
CD200	6.14951e-172	1.66791	0.463	0.028	2.7789e-167	C06 - CD4+ Tfh : CXCL13 ADT-PD1	CD200
RBPJ	1.41126e-129	1.40991	0.839	0.407	6.37735e-125	C06 - CD4+ Tfh : CXCL13 ADT-PD1	RBPJ
TSHZ2	1.31461e-116	1.52729	0.595	0.127	5.94058e-112	C06 - CD4+ Tfh : CXCL13 ADT-PD1	TSHZ2
CHN1	2.62355e-103	1.32727	0.385	0.039	1.18556e-98	C06 - CD4+ Tfh : CXCL13 ADT-PD1	CHN1
CTLA41	8.48959e-103	1.17557	0.758	0.251	3.83636e-98	C06 - CD4+ Tfh : CXCL13 ADT-PD1	CTLA4
CPM	1.53849e-95	1.15861	0.322	0.032	6.95229e-91	C06 - CD4+ Tfh : CXCL13 ADT-PD1	CPM
CCDC501	3.06153e-94	1.22283	0.434	0.085	1.38348e-89	C06 - CD4+ Tfh : CXCL13 ADT-PD1	CCDC50
DUSP41	1.23386e-89	1.25158	0.906	0.56	5.57571e-85	C06 - CD4+ Tfh : CXCL13 ADT-PD1	DUSP4
ITM2A	8.24714e-88	1.19999	0.837	0.527	3.7268e-83	C06 - CD4+ Tfh : CXCL13 ADT-PD1	ITM2A
TNFRSF181	3.82043e-87	1.20667	0.729	0.269	1.72641e-82	C06 - CD4+ Tfh : CXCL13 ADT-PD1	TNFRSF18
PDCD1	8.98551e-85	1.17391	0.477	0.103	4.06046e-80	C06 - CD4+ Tfh : CXCL13 ADT-PD1	PDCD1
MAF1	2.54294e-84	1.33038	0.664	0.258	1.14913e-79	C06 - CD4+ Tfh : CXCL13 ADT-PD1	MAF
GNG4	3.87486e-83	0.797397	0.19	0.005	1.75101e-78	C06 - CD4+ Tfh : CXCL13 ADT-PD1	GNG4
BTLA	3.53568e-79	0.867636	0.306	0.038	1.59774e-74	C06 - CD4+ Tfh : CXCL13 ADT-PD1	BTLA
TNFRSF41	1.27207e-76	0.875691	0.64	0.213	5.74834e-72	C06 - CD4+ Tfh : CXCL13 ADT-PD1	TNFRSF4
ICA11	5.86253e-74	1.18381	0.345	0.055	2.64922e-69	C06 - CD4+ Tfh : CXCL13 ADT-PD1	ICA1
GEM1	4.39822e-72	1.47773	0.49	0.134	1.98751e-67	C06 - CD4+ Tfh : CXCL13 ADT-PD1	GEM
FKBP5	5.07928e-70	1.19628	0.593	0.247	2.29527e-65	C06 - CD4+ Tfh : CXCL13 ADT-PD1	FKBP5
PGM2L11	3.92775e-66	1.39422	0.365	0.159	1.77491e-61	C06 - CD4+ Tfh : CXCL13 ADT-PD1	PGM2L1
SNX91	1.75779e-60	1.0312	0.537	0.213	7.94329e-56	C06 - CD4+ Tfh : CXCL13 ADT-PD1	SNX9
PTPN13	5.96838e-60	0.678551	0.204	0.016	2.69705e-55	C06 - CD4+ Tfh : CXCL13 ADT-PD1	PTPN13
TOX	1.67224e-59	0.928582	0.396	0.101	7.55668e-55	C06 - CD4+ Tfh : CXCL13 ADT-PD1	TOX
LINC01281	9.07935e-58	0.661244	0.217	0.021	4.10287e-53	C06 - CD4+ Tfh : CXCL13 ADT-PD1	LINC01281
AHI1	5.72467e-57	1.01619	0.483	0.182	2.58692e-52	C06 - CD4+ Tfh : CXCL13 ADT-PD1	AHI1
GAPDH1	1.97428e-54	0.728879	0.973	0.901	8.92158e-50	C06 - CD4+ Tfh : CXCL13 ADT-PD1	GAPDH
PCAT29	1.59353e-53	0.514434	0.159	0.008	7.20101e-49	C06 - CD4+ Tfh : CXCL13 ADT-PD1	PCAT29
IL21	5.54459e-52	0.851474	0.143	0.006	2.50554e-47	C06 - CD4+ Tfh : CXCL13 ADT-PD1	IL21
RAB11FIP11	8.91934e-52	1.04015	0.62	0.317	4.03056e-47	C06 - CD4+ Tfh : CXCL13 ADT-PD1	RAB11FIP1
AGFG1	6.11644e-51	0.825241	0.425	0.147	2.76396e-46	C06 - CD4+ Tfh : CXCL13 ADT-PD1	AGFG1
PDE7B	1.17725e-48	0.43709	0.134	0.005	5.31988e-44	C06 - CD4+ Tfh : CXCL13 ADT-PD1	PDE7B
IL6ST1	2.57391e-48	0.989463	0.494	0.227	1.16312e-43	C06 - CD4+ Tfh : CXCL13 ADT-PD1	IL6ST
TOX21	8.40971e-47	0.672617	0.293	0.065	3.80027e-42	C06 - CD4+ Tfh : CXCL13 ADT-PD1	TOX2
ARID5B1	1.15789e-45	0.877173	0.819	0.538	5.2324e-41	C06 - CD4+ Tfh : CXCL13 ADT-PD1	ARID5B
TIGIT1	1.78653e-45	0.779648	0.662	0.32	8.07317e-41	C06 - CD4+ Tfh : CXCL13 ADT-PD1	TIGIT
MSI21	1.885e-44	0.846524	0.526	0.232	8.51814e-40	C06 - CD4+ Tfh : CXCL13 ADT-PD1	MSI2
BHLHE40	9.23188e-44	0.91129	0.535	0.239	4.17179e-39	C06 - CD4+ Tfh : CXCL13 ADT-PD1	BHLHE40
LIMS11	7.72249e-43	0.83322	0.595	0.312	3.48972e-38	C06 - CD4+ Tfh : CXCL13 ADT-PD1	LIMS1
ZBED21	6.43853e-42	0.705559	0.195	0.028	2.90951e-37	C06 - CD4+ Tfh : CXCL13 ADT-PD1	ZBED2
NPDC1	1.38716e-41	0.705855	0.333	0.097	6.26845e-37	C06 - CD4+ Tfh : CXCL13 ADT-PD1	NPDC1
COL9A21	1.7015e-40	0.564612	0.257	0.055	7.68892e-36	C06 - CD4+ Tfh : CXCL13 ADT-PD1	COL9A2
MYO7A	5.83415e-40	0.583556	0.208	0.033	2.63639e-35	C06 - CD4+ Tfh : CXCL13 ADT-PD1	MYO7A
BHLHE40-AS1	6.09204e-39	0.478573	0.154	0.016	2.75293e-34	C06 - CD4+ Tfh : CXCL13 ADT-PD1	BHLHE40-AS1
MFHAS11	1.21322e-38	0.749604	0.306	0.101	5.48242e-34	C06 - CD4+ Tfh : CXCL13 ADT-PD1	MFHAS1
TGIF1	4.75662e-38	0.78906	0.553	0.265	2.14947e-33	C06 - CD4+ Tfh : CXCL13 ADT-PD1	TGIF1
ISCU1	1.12515e-37	0.74176	0.629	0.426	5.08442e-33	C06 - CD4+ Tfh : CXCL13 ADT-PD1	ISCU
CAMK1	2.03595e-37	0.547286	0.215	0.044	9.20025e-33	C06 - CD4+ Tfh : CXCL13 ADT-PD1	CAMK1
FKBP1A1	1.73724e-36	0.768648	0.622	0.386	7.8504e-32	C06 - CD4+ Tfh : CXCL13 ADT-PD1	FKBP1A
PDE3B	1.24525e-35	0.78425	0.45	0.2	5.62716e-31	C06 - CD4+ Tfh : CXCL13 ADT-PD1	PDE3B
KLRB11	2.0448e-35	0.78642	0.557	0.264	9.24025e-31	C06 - CD4+ Tfh : CXCL13 ADT-PD1	KLRB1
RDH10	2.50454e-35	0.590607	0.192	0.036	1.13177e-30	C06 - CD4+ Tfh : CXCL13 ADT-PD1	RDH10
SESN3	2.97962e-35	0.713459	0.347	0.115	1.34646e-30	C06 - CD4+ Tfh : CXCL13 ADT-PD1	SESN3
SMCO4	5.03175e-35	0.488263	0.195	0.036	2.2738e-30	C06 - CD4+ Tfh : CXCL13 ADT-PD1	SMCO4
IQGAP11	8.33517e-35	0.714348	0.689	0.487	3.76658e-30	C06 - CD4+ Tfh : CXCL13 ADT-PD1	IQGAP1
CD41	1.22488e-34	0.713482	0.447	0.188	5.53511e-30	C06 - CD4+ Tfh : CXCL13 ADT-PD1	CD4
LINC01480	3.35e-34	0.542958	0.161	0.022	1.51383e-29	C06 - CD4+ Tfh : CXCL13 ADT-PD1	LINC01480
SEC11A1	3.5218e-34	0.664778	0.647	0.435	1.59146e-29	C06 - CD4+ Tfh : CXCL13 ADT-PD1	SEC11A
C1orf228	5.83062e-34	0.528399	0.188	0.031	2.6348e-29	C06 - CD4+ Tfh : CXCL13 ADT-PD1	C1orf228
CD109	1.33652e-33	0.456468	0.148	0.019	6.03961e-29	C06 - CD4+ Tfh : CXCL13 ADT-PD1	CD109
POU3F1	2.19343e-33	0.769414	0.32	0.102	9.9119e-29	C06 - CD4+ Tfh : CXCL13 ADT-PD1	POU3F1
METTL8	6.01302e-33	0.58285	0.264	0.07	2.71723e-28	C06 - CD4+ Tfh : CXCL13 ADT-PD1	METTL8
BATF1	6.69241e-33	0.618473	0.622	0.331	3.02423e-28	C06 - CD4+ Tfh : CXCL13 ADT-PD1	BATF
C9orf161	1.16505e-32	0.675159	0.689	0.488	5.26472e-28	C06 - CD4+ Tfh : CXCL13 ADT-PD1	C9orf16
PKM1	3.3433e-32	0.753564	0.655	0.415	1.5108e-27	C06 - CD4+ Tfh : CXCL13 ADT-PD1	PKM
DGKH	2.26123e-31	0.59172	0.3	0.093	1.02183e-26	C06 - CD4+ Tfh : CXCL13 ADT-PD1	DGKH
DNPH11	6.17834e-31	0.714097	0.506	0.261	2.79193e-26	C06 - CD4+ Tfh : CXCL13 ADT-PD1	DNPH1
HSPB11	1.14034e-30	0.797311	0.662	0.436	5.15309e-26	C06 - CD4+ Tfh : CXCL13 ADT-PD1	HSPB1
SORD	1.65917e-30	0.434491	0.141	0.02	7.49761e-26	C06 - CD4+ Tfh : CXCL13 ADT-PD1	SORD
RGS11	1.74027e-30	0.816513	0.855	0.665	7.86409e-26	C06 - CD4+ Tfh : CXCL13 ADT-PD1	RGS1
CYSLTR1	6.97217e-30	0.588986	0.257	0.072	3.15065e-25	C06 - CD4+ Tfh : CXCL13 ADT-PD1	CYSLTR1
PAG1	2.09243e-29	0.695564	0.515	0.27	9.4555e-25	C06 - CD4+ Tfh : CXCL13 ADT-PD1	PAG1
CD84	5.02703e-29	0.630942	0.412	0.173	2.27166e-24	C06 - CD4+ Tfh : CXCL13 ADT-PD1	CD84
NAB11	7.03372e-29	0.655995	0.311	0.116	3.17847e-24	C06 - CD4+ Tfh : CXCL13 ADT-PD1	NAB1
FZD3	7.25798e-29	0.354638	0.107	0.009	3.27981e-24	C06 - CD4+ Tfh : CXCL13 ADT-PD1	FZD3
FABP52	8.34012e-29	0.847051	0.506	0.267	3.76882e-24	C06 - CD4+ Tfh : CXCL13 ADT-PD1	FABP5
CORO1B1	9.82545e-29	0.683862	0.57	0.318	4.44002e-24	C06 - CD4+ Tfh : CXCL13 ADT-PD1	CORO1B
TIAM11	1.28138e-28	0.592837	0.262	0.084	5.79043e-24	C06 - CD4+ Tfh : CXCL13 ADT-PD1	TIAM1
ADGRG1	1.6866e-28	0.479154	0.168	0.031	7.62157e-24	C06 - CD4+ Tfh : CXCL13 ADT-PD1	ADGRG1
CD821	3.36645e-28	0.679571	0.483	0.248	1.52126e-23	C06 - CD4+ Tfh : CXCL13 ADT-PD1	CD82
VOPP11	5.23383e-28	0.656102	0.45	0.224	2.36512e-23	C06 - CD4+ Tfh : CXCL13 ADT-PD1	VOPP1
LIMA11	6.05543e-28	0.609244	0.291	0.102	2.73639e-23	C06 - CD4+ Tfh : CXCL13 ADT-PD1	LIMA1
CD21	1.1134e-27	0.553581	0.915	0.817	5.03133e-23	C06 - CD4+ Tfh : CXCL13 ADT-PD1	CD2
TANK1	1.28625e-27	0.727548	0.669	0.475	5.81245e-23	C06 - CD4+ Tfh : CXCL13 ADT-PD1	TANK
SPOCK21	1.37776e-27	0.634375	0.747	0.537	6.22598e-23	C06 - CD4+ Tfh : CXCL13 ADT-PD1	SPOCK2
ARL3	1.41431e-27	0.513228	0.246	0.074	6.39111e-23	C06 - CD4+ Tfh : CXCL13 ADT-PD1	ARL3
TRPS11	1.70067e-27	0.628382	0.421	0.188	7.68518e-23	C06 - CD4+ Tfh : CXCL13 ADT-PD1	TRPS1
LHFP	1.71027e-27	0.335065	0.11	0.011	7.72856e-23	C06 - CD4+ Tfh : CXCL13 ADT-PD1	LHFP
SIAH2	1.91809e-27	0.667465	0.53	0.307	8.66765e-23	C06 - CD4+ Tfh : CXCL13 ADT-PD1	SIAH2
G0S2	2.09234e-27	0.82165	0.107	0.02	9.45506e-23	C06 - CD4+ Tfh : CXCL13 ADT-PD1	G0S2
RNF19A1	2.90662e-27	0.657421	0.74	0.533	1.31347e-22	C06 - CD4+ Tfh : CXCL13 ADT-PD1	RNF19A
CDK61	2.94118e-27	0.640303	0.369	0.156	1.32909e-22	C06 - CD4+ Tfh : CXCL13 ADT-PD1	CDK6
KIAA0319L	5.9694e-27	0.653778	0.26	0.093	2.69751e-22	C06 - CD4+ Tfh : CXCL13 ADT-PD1	KIAA0319L
CFLAR1	6.08317e-27	0.664737	0.658	0.469	2.74892e-22	C06 - CD4+ Tfh : CXCL13 ADT-PD1	CFLAR
SRGN	1.17723e-26	0.575053	0.989	0.951	5.3198e-22	C06 - CD4+ Tfh : CXCL13 ADT-PD1	SRGN
TP53INP1	2.80501e-26	0.666157	0.291	0.112	1.26756e-21	C06 - CD4+ Tfh : CXCL13 ADT-PD1	TP53INP1
EPSTI11	3.10209e-26	0.646119	0.526	0.294	1.4018e-21	C06 - CD4+ Tfh : CXCL13 ADT-PD1	EPSTI1
CD40LG2	5.49958e-26	0.640563	0.405	0.179	2.4852e-21	C06 - CD4+ Tfh : CXCL13 ADT-PD1	CD40LG
COTL11	6.81376e-26	0.496649	0.85	0.64	3.07907e-21	C06 - CD4+ Tfh : CXCL13 ADT-PD1	COTL1
KIAA1324	8.13285e-26	0.382483	0.145	0.025	3.67515e-21	C06 - CD4+ Tfh : CXCL13 ADT-PD1	KIAA1324
OAZ11	3.52624e-25	0.406993	0.973	0.915	1.59347e-20	C06 - CD4+ Tfh : CXCL13 ADT-PD1	OAZ1
CTSL2	1.0036e-24	0.812876	0.233	0.081	4.53515e-20	C06 - CD4+ Tfh : CXCL13 ADT-PD1	CTSL
SARDH	1.04186e-24	0.347282	0.157	0.031	4.70804e-20	C06 - CD4+ Tfh : CXCL13 ADT-PD1	SARDH
TYMP1	1.32149e-24	0.671167	0.638	0.404	5.97166e-20	C06 - CD4+ Tfh : CXCL13 ADT-PD1	TYMP
NDFIP21	1.50377e-24	0.549117	0.318	0.137	6.7954e-20	C06 - CD4+ Tfh : CXCL13 ADT-PD1	NDFIP2
ZNF2811	1.55031e-24	0.619938	0.331	0.14	7.00569e-20	C06 - CD4+ Tfh : CXCL13 ADT-PD1	ZNF281
ZNRF11	3.97889e-24	0.563801	0.445	0.224	1.79802e-19	C06 - CD4+ Tfh : CXCL13 ADT-PD1	ZNRF1
ITPR1	4.77181e-24	0.556346	0.242	0.096	2.15633e-19	C06 - CD4+ Tfh : CXCL13 ADT-PD1	ITPR1
UCP21	5.39745e-24	0.67597	0.548	0.356	2.43905e-19	C06 - CD4+ Tfh : CXCL13 ADT-PD1	UCP2
SMARCA2	6.54969e-24	0.625296	0.436	0.232	2.95974e-19	C06 - CD4+ Tfh : CXCL13 ADT-PD1	SMARCA2
SIRPG1	7.58015e-24	0.543631	0.342	0.143	3.42539e-19	C06 - CD4+ Tfh : CXCL13 ADT-PD1	SIRPG
BAG3	1.52544e-23	0.72316	0.391	0.215	6.89332e-19	C06 - CD4+ Tfh : CXCL13 ADT-PD1	BAG3
DAPP11	5.2328e-23	0.577981	0.26	0.096	2.36465e-18	C06 - CD4+ Tfh : CXCL13 ADT-PD1	DAPP1
TSPO	7.56841e-23	0.508868	0.723	0.53	3.42009e-18	C06 - CD4+ Tfh : CXCL13 ADT-PD1	TSPO
FBLN71	8.62048e-23	0.451102	0.228	0.073	3.89551e-18	C06 - CD4+ Tfh : CXCL13 ADT-PD1	FBLN7
PPP1CC	1.00201e-22	0.581512	0.468	0.271	4.528e-18	C06 - CD4+ Tfh : CXCL13 ADT-PD1	PPP1CC
YWHAQ	1.03531e-22	0.610788	0.673	0.521	4.67846e-18	C06 - CD4+ Tfh : CXCL13 ADT-PD1	YWHAQ
RGS2	1.55494e-22	0.702428	0.662	0.448	7.02662e-18	C06 - CD4+ Tfh : CXCL13 ADT-PD1	RGS2
ALOX5AP1	1.90363e-22	0.666085	0.642	0.431	8.60231e-18	C06 - CD4+ Tfh : CXCL13 ADT-PD1	ALOX5AP
SRGAP3	5.97049e-22	0.557912	0.255	0.091	2.698e-17	C06 - CD4+ Tfh : CXCL13 ADT-PD1	SRGAP3
SRP141	6.46616e-22	0.42163	0.915	0.799	2.92199e-17	C06 - CD4+ Tfh : CXCL13 ADT-PD1	SRP14
RP5-1028K7.2	1.16208e-21	0.432341	0.17	0.042	5.25132e-17	C06 - CD4+ Tfh : CXCL13 ADT-PD1	RP5-1028K7.2
HIF1A	1.59041e-21	0.553365	0.407	0.23	7.18689e-17	C06 - CD4+ Tfh : CXCL13 ADT-PD1	HIF1A
LYST2	2.78965e-21	0.619007	0.51	0.307	1.26061e-16	C06 - CD4+ Tfh : CXCL13 ADT-PD1	LYST
LAPTM5	3.29118e-21	0.527512	0.814	0.712	1.48725e-16	C06 - CD4+ Tfh : CXCL13 ADT-PD1	LAPTM5
ARPC1B1	5.77859e-21	0.538089	0.745	0.595	2.61129e-16	C06 - CD4+ Tfh : CXCL13 ADT-PD1	ARPC1B
PLIN21	6.6377e-21	0.869325	0.456	0.298	2.99951e-16	C06 - CD4+ Tfh : CXCL13 ADT-PD1	PLIN2
FAM107B3	9.52022e-21	0.60664	0.752	0.613	4.30209e-16	C06 - CD4+ Tfh : CXCL13 ADT-PD1	FAM107B
TNFSF4	1.07177e-20	0.352156	0.128	0.024	4.84322e-16	C06 - CD4+ Tfh : CXCL13 ADT-PD1	TNFSF4
PGAM11	1.12804e-20	0.547741	0.586	0.384	5.0975e-16	C06 - CD4+ Tfh : CXCL13 ADT-PD1	PGAM1
SLA1	1.31312e-20	0.571011	0.667	0.446	5.93387e-16	C06 - CD4+ Tfh : CXCL13 ADT-PD1	SLA
IGFBP4	1.51302e-20	0.450063	0.197	0.062	6.83717e-16	C06 - CD4+ Tfh : CXCL13 ADT-PD1	IGFBP4
SERPINE21	1.69997e-20	0.623073	0.119	0.051	7.682e-16	C06 - CD4+ Tfh : CXCL13 ADT-PD1	SERPINE2
BST21	1.93752e-20	0.54318	0.662	0.445	8.75545e-16	C06 - CD4+ Tfh : CXCL13 ADT-PD1	BST2
TNFRSF251	2.06857e-20	0.549506	0.474	0.266	9.34767e-16	C06 - CD4+ Tfh : CXCL13 ADT-PD1	TNFRSF25
TNFAIP8	2.07114e-20	0.58068	0.562	0.411	9.35929e-16	C06 - CD4+ Tfh : CXCL13 ADT-PD1	TNFAIP8
EED1	2.26945e-20	0.473278	0.338	0.151	1.02554e-15	C06 - CD4+ Tfh : CXCL13 ADT-PD1	EED
ETV71	4.05207e-20	0.49651	0.217	0.076	1.83109e-15	C06 - CD4+ Tfh : CXCL13 ADT-PD1	ETV7
LMCD11	9.10287e-20	0.371429	0.166	0.044	4.11349e-15	C06 - CD4+ Tfh : CXCL13 ADT-PD1	LMCD1
RABGAP1L	1.11516e-19	0.499895	0.488	0.277	5.03929e-15	C06 - CD4+ Tfh : CXCL13 ADT-PD1	RABGAP1L
ARID4B	1.30143e-19	0.529316	0.74	0.609	5.88102e-15	C06 - CD4+ Tfh : CXCL13 ADT-PD1	ARID4B
CTSB	2.24703e-19	0.499419	0.427	0.231	1.01541e-14	C06 - CD4+ Tfh : CXCL13 ADT-PD1	CTSB
GADD45G	2.42248e-19	0.798163	0.336	0.169	1.09469e-14	C06 - CD4+ Tfh : CXCL13 ADT-PD1	GADD45G
TSPAN2	2.99814e-19	0.397601	0.143	0.037	1.35483e-14	C06 - CD4+ Tfh : CXCL13 ADT-PD1	TSPAN2
PDE4D	4.34967e-19	0.546843	0.365	0.184	1.96557e-14	C06 - CD4+ Tfh : CXCL13 ADT-PD1	PDE4D
ZEB22	4.73779e-19	0.610059	0.474	0.265	2.14096e-14	C06 - CD4+ Tfh : CXCL13 ADT-PD1	ZEB2
SERPINH11	7.94118e-19	0.568091	0.264	0.106	3.58854e-14	C06 - CD4+ Tfh : CXCL13 ADT-PD1	SERPINH1
RP11-25K19.1	1.11153e-18	0.364484	0.134	0.03	5.02291e-14	C06 - CD4+ Tfh : CXCL13 ADT-PD1	RP11-25K19.1
PKIA1	1.14595e-18	0.424177	0.228	0.084	5.17845e-14	C06 - CD4+ Tfh : CXCL13 ADT-PD1	PKIA
VDR1	2.09826e-18	0.38202	0.172	0.052	9.48184e-14	C06 - CD4+ Tfh : CXCL13 ADT-PD1	VDR
ANXA5	3.24384e-18	0.521379	0.577	0.391	1.46586e-13	C06 - CD4+ Tfh : CXCL13 ADT-PD1	ANXA5
MTHFD2	4.44958e-18	0.540026	0.4	0.239	2.01072e-13	C06 - CD4+ Tfh : CXCL13 ADT-PD1	MTHFD2
KLF7	5.92376e-18	0.370519	0.112	0.027	2.67689e-13	C06 - CD4+ Tfh : CXCL13 ADT-PD1	KLF7
SFXN1	6.34235e-18	0.535448	0.304	0.148	2.86605e-13	C06 - CD4+ Tfh : CXCL13 ADT-PD1	SFXN1
SIPA1L1	7.64754e-18	0.467737	0.253	0.11	3.45584e-13	C06 - CD4+ Tfh : CXCL13 ADT-PD1	SIPA1L1
MIR155HG	9.08756e-18	0.823314	0.266	0.119	4.10658e-13	C06 - CD4+ Tfh : CXCL13 ADT-PD1	MIR155HG
NCF41	1.13191e-17	0.437921	0.257	0.106	5.11497e-13	C06 - CD4+ Tfh : CXCL13 ADT-PD1	NCF4
MAP1LC3A1	1.13631e-17	0.490388	0.302	0.14	5.13487e-13	C06 - CD4+ Tfh : CXCL13 ADT-PD1	MAP1LC3A
CYTH3	1.21085e-17	0.290863	0.121	0.026	5.4717e-13	C06 - CD4+ Tfh : CXCL13 ADT-PD1	CYTH3
TMEM1731	1.33299e-17	0.503796	0.472	0.281	6.02366e-13	C06 - CD4+ Tfh : CXCL13 ADT-PD1	TMEM173
TRABD2A	1.40708e-17	0.513238	0.179	0.061	6.35844e-13	C06 - CD4+ Tfh : CXCL13 ADT-PD1	TRABD2A
COL6A3	1.48347e-17	0.309638	0.101	0.018	6.70367e-13	C06 - CD4+ Tfh : CXCL13 ADT-PD1	COL6A3
ELMO1	1.58164e-17	0.464837	0.318	0.151	7.14726e-13	C06 - CD4+ Tfh : CXCL13 ADT-PD1	ELMO1
ATXN1	1.58491e-17	0.574736	0.407	0.23	7.16206e-13	C06 - CD4+ Tfh : CXCL13 ADT-PD1	ATXN1
SOD11	1.8564e-17	0.47039	0.87	0.753	8.38889e-13	C06 - CD4+ Tfh : CXCL13 ADT-PD1	SOD1
ANAPC161	2.67004e-17	0.47265	0.711	0.578	1.20657e-12	C06 - CD4+ Tfh : CXCL13 ADT-PD1	ANAPC16
CD247	3.37903e-17	0.516767	0.671	0.493	1.52695e-12	C06 - CD4+ Tfh : CXCL13 ADT-PD1	CD247
PHF6	3.89182e-17	0.48014	0.251	0.108	1.75867e-12	C06 - CD4+ Tfh : CXCL13 ADT-PD1	PHF6
NAP1L4	4.11399e-17	0.540027	0.519	0.355	1.85907e-12	C06 - CD4+ Tfh : CXCL13 ADT-PD1	NAP1L4
CD61	4.34966e-17	0.511184	0.555	0.368	1.96557e-12	C06 - CD4+ Tfh : CXCL13 ADT-PD1	CD6
CCDC6	4.85544e-17	0.389656	0.244	0.098	2.19413e-12	C06 - CD4+ Tfh : CXCL13 ADT-PD1	CCDC6
GRAMD1A	6.77165e-17	0.515773	0.347	0.184	3.06004e-12	C06 - CD4+ Tfh : CXCL13 ADT-PD1	GRAMD1A
EDF11	7.956e-17	0.42918	0.819	0.687	3.59524e-12	C06 - CD4+ Tfh : CXCL13 ADT-PD1	EDF1
INPP5F1	1.11172e-16	0.413414	0.19	0.066	5.02374e-12	C06 - CD4+ Tfh : CXCL13 ADT-PD1	INPP5F
SHFM11	1.43066e-16	0.519472	0.387	0.221	6.46502e-12	C06 - CD4+ Tfh : CXCL13 ADT-PD1	SHFM1
ITGB1	2.08693e-16	0.498055	0.664	0.486	9.43061e-12	C06 - CD4+ Tfh : CXCL13 ADT-PD1	ITGB1
CXorf211	2.27944e-16	0.369822	0.132	0.034	1.03005e-11	C06 - CD4+ Tfh : CXCL13 ADT-PD1	CXorf21
MYL6B1	2.84501e-16	0.328212	0.179	0.062	1.28563e-11	C06 - CD4+ Tfh : CXCL13 ADT-PD1	MYL6B
DAPK2	2.9733e-16	0.358607	0.174	0.056	1.34361e-11	C06 - CD4+ Tfh : CXCL13 ADT-PD1	DAPK2
GK1	3.16221e-16	0.490292	0.293	0.134	1.42897e-11	C06 - CD4+ Tfh : CXCL13 ADT-PD1	GK
CSGALNACT1	3.51078e-16	0.378266	0.177	0.06	1.58648e-11	C06 - CD4+ Tfh : CXCL13 ADT-PD1	CSGALNACT1
CACYBP1	4.32576e-16	0.524784	0.664	0.485	1.95477e-11	C06 - CD4+ Tfh : CXCL13 ADT-PD1	CACYBP
AC104820.2	5.21631e-16	0.291646	0.148	0.042	2.3572e-11	C06 - CD4+ Tfh : CXCL13 ADT-PD1	AC104820.2
PHACTR21	5.92459e-16	0.528071	0.416	0.239	2.67726e-11	C06 - CD4+ Tfh : CXCL13 ADT-PD1	PHACTR2
MS4A6A	7.16032e-16	0.33435	0.101	0.02	3.23568e-11	C06 - CD4+ Tfh : CXCL13 ADT-PD1	MS4A6A
JARID2	8.3317e-16	0.515689	0.302	0.169	3.76501e-11	C06 - CD4+ Tfh : CXCL13 ADT-PD1	JARID2
HNRNPLL1	8.63473e-16	0.531622	0.309	0.161	3.90195e-11	C06 - CD4+ Tfh : CXCL13 ADT-PD1	HNRNPLL
ATP5G21	9.00718e-16	0.542199	0.548	0.38	4.07025e-11	C06 - CD4+ Tfh : CXCL13 ADT-PD1	ATP5G2
ANP32B1	1.01299e-15	0.416013	0.691	0.531	4.5776e-11	C06 - CD4+ Tfh : CXCL13 ADT-PD1	ANP32B
RHOA1	1.16495e-15	0.432637	0.772	0.636	5.2643e-11	C06 - CD4+ Tfh : CXCL13 ADT-PD1	RHOA
ZC2HC1A1	1.31574e-15	0.34817	0.168	0.054	5.94569e-11	C06 - CD4+ Tfh : CXCL13 ADT-PD1	ZC2HC1A
AC133644.21	1.92295e-15	0.489462	0.235	0.096	8.68962e-11	C06 - CD4+ Tfh : CXCL13 ADT-PD1	AC133644.2
THADA1	2.51559e-15	0.463884	0.221	0.09	1.13677e-10	C06 - CD4+ Tfh : CXCL13 ADT-PD1	THADA
ATPIF11	2.54771e-15	0.47319	0.412	0.237	1.15128e-10	C06 - CD4+ Tfh : CXCL13 ADT-PD1	ATPIF1
CIRBP	2.56945e-15	0.393682	0.852	0.759	1.16111e-10	C06 - CD4+ Tfh : CXCL13 ADT-PD1	CIRBP
SERF2	2.76389e-15	0.322615	0.955	0.912	1.24898e-10	C06 - CD4+ Tfh : CXCL13 ADT-PD1	SERF2
GPX41	2.99253e-15	0.441855	0.702	0.547	1.3523e-10	C06 - CD4+ Tfh : CXCL13 ADT-PD1	GPX4
NCALD	4.31628e-15	0.33958	0.179	0.064	1.95049e-10	C06 - CD4+ Tfh : CXCL13 ADT-PD1	NCALD
TNFSF13B	4.47773e-15	0.470848	0.19	0.073	2.02344e-10	C06 - CD4+ Tfh : CXCL13 ADT-PD1	TNFSF13B
TIAM2	5.01881e-15	0.313924	0.123	0.032	2.26795e-10	C06 - CD4+ Tfh : CXCL13 ADT-PD1	TIAM2
GNA151	5.59833e-15	0.435037	0.233	0.104	2.52983e-10	C06 - CD4+ Tfh : CXCL13 ADT-PD1	GNA15
MIS18BP1	7.09564e-15	0.484334	0.351	0.191	3.20645e-10	C06 - CD4+ Tfh : CXCL13 ADT-PD1	MIS18BP1
SMS1	1.01707e-14	0.492457	0.345	0.192	4.59605e-10	C06 - CD4+ Tfh : CXCL13 ADT-PD1	SMS
ANKS1B	1.65838e-14	0.322106	0.107	0.025	7.49406e-10	C06 - CD4+ Tfh : CXCL13 ADT-PD1	ANKS1B
BIRC31	1.68101e-14	0.523568	0.758	0.635	7.59633e-10	C06 - CD4+ Tfh : CXCL13 ADT-PD1	BIRC3
RPL7L1	1.76045e-14	0.435833	0.387	0.226	7.95528e-10	C06 - CD4+ Tfh : CXCL13 ADT-PD1	RPL7L1
PTMS1	2.0781e-14	0.50408	0.398	0.226	9.39071e-10	C06 - CD4+ Tfh : CXCL13 ADT-PD1	PTMS
SH2D1A1	2.54064e-14	0.478508	0.452	0.286	1.14809e-09	C06 - CD4+ Tfh : CXCL13 ADT-PD1	SH2D1A
NFATC11	2.54599e-14	0.406293	0.273	0.13	1.15051e-09	C06 - CD4+ Tfh : CXCL13 ADT-PD1	NFATC1
RALA	2.67587e-14	0.427568	0.371	0.216	1.2092e-09	C06 - CD4+ Tfh : CXCL13 ADT-PD1	RALA
EBI31	3.54158e-14	0.304517	0.107	0.027	1.6004e-09	C06 - CD4+ Tfh : CXCL13 ADT-PD1	EBI3
CNIH11	3.55219e-14	0.396475	0.356	0.193	1.6052e-09	C06 - CD4+ Tfh : CXCL13 ADT-PD1	CNIH1
TBXAS1	3.64329e-14	0.259553	0.105	0.025	1.64637e-09	C06 - CD4+ Tfh : CXCL13 ADT-PD1	TBXAS1
CAPZB	3.73781e-14	0.404814	0.682	0.524	1.68908e-09	C06 - CD4+ Tfh : CXCL13 ADT-PD1	CAPZB
ZEB11	4.1032e-14	0.428998	0.311	0.169	1.85419e-09	C06 - CD4+ Tfh : CXCL13 ADT-PD1	ZEB1
HSBP11	5.18017e-14	0.392668	0.336	0.182	2.34087e-09	C06 - CD4+ Tfh : CXCL13 ADT-PD1	HSBP1
DTHD11	5.69109e-14	0.307531	0.174	0.066	2.57175e-09	C06 - CD4+ Tfh : CXCL13 ADT-PD1	DTHD1
NINJ21	6.29179e-14	0.352615	0.15	0.053	2.8432e-09	C06 - CD4+ Tfh : CXCL13 ADT-PD1	NINJ2
PHTF21	8.33146e-14	0.46577	0.331	0.186	3.7649e-09	C06 - CD4+ Tfh : CXCL13 ADT-PD1	PHTF2
SPATS2L1	8.77415e-14	0.390945	0.295	0.147	3.96495e-09	C06 - CD4+ Tfh : CXCL13 ADT-PD1	SPATS2L
PRDX11	9.41048e-14	0.467521	0.732	0.604	4.2525e-09	C06 - CD4+ Tfh : CXCL13 ADT-PD1	PRDX1
MBNL2	1.0352e-13	0.39977	0.237	0.107	4.67794e-09	C06 - CD4+ Tfh : CXCL13 ADT-PD1	MBNL2
LRMP	1.39066e-13	0.388071	0.206	0.086	6.28426e-09	C06 - CD4+ Tfh : CXCL13 ADT-PD1	LRMP
PTPN11	1.48046e-13	0.426731	0.219	0.105	6.69007e-09	C06 - CD4+ Tfh : CXCL13 ADT-PD1	PTPN11
CCNI1	1.53805e-13	0.352207	0.841	0.75	6.9503e-09	C06 - CD4+ Tfh : CXCL13 ADT-PD1	CCNI
ENTPD11	1.54723e-13	0.373974	0.206	0.084	6.99177e-09	C06 - CD4+ Tfh : CXCL13 ADT-PD1	ENTPD1
HLA-DPA12	1.58682e-13	0.281056	0.711	0.528	7.17069e-09	C06 - CD4+ Tfh : CXCL13 ADT-PD1	HLA-DPA1
SMAP21	1.79125e-13	0.437573	0.609	0.452	8.09448e-09	C06 - CD4+ Tfh : CXCL13 ADT-PD1	SMAP2
MIR3142HG1	1.87911e-13	0.322999	0.145	0.047	8.49151e-09	C06 - CD4+ Tfh : CXCL13 ADT-PD1	MIR3142HG
CD591	1.88477e-13	0.382506	0.282	0.14	8.51709e-09	C06 - CD4+ Tfh : CXCL13 ADT-PD1	CD59
HSPA41	1.93918e-13	0.45974	0.434	0.279	8.76297e-09	C06 - CD4+ Tfh : CXCL13 ADT-PD1	HSPA4
PHPT11	1.99363e-13	0.453944	0.503	0.337	9.00902e-09	C06 - CD4+ Tfh : CXCL13 ADT-PD1	PHPT1
MYCBP2	2.34863e-13	0.439203	0.555	0.417	1.06132e-08	C06 - CD4+ Tfh : CXCL13 ADT-PD1	MYCBP2
RAC11	2.53267e-13	0.397307	0.62	0.447	1.14449e-08	C06 - CD4+ Tfh : CXCL13 ADT-PD1	RAC1
SEC11C1	2.55208e-13	0.422946	0.472	0.32	1.15326e-08	C06 - CD4+ Tfh : CXCL13 ADT-PD1	SEC11C
MSRA	2.76565e-13	0.31962	0.157	0.058	1.24977e-08	C06 - CD4+ Tfh : CXCL13 ADT-PD1	MSRA
CCDC1671	2.78055e-13	0.34461	0.378	0.214	1.2565e-08	C06 - CD4+ Tfh : CXCL13 ADT-PD1	CCDC167
LRRC8D	3.10177e-13	0.289379	0.123	0.037	1.40166e-08	C06 - CD4+ Tfh : CXCL13 ADT-PD1	LRRC8D
ATP5J21	3.13003e-13	0.400944	0.333	0.181	1.41443e-08	C06 - CD4+ Tfh : CXCL13 ADT-PD1	ATP5J2
TCEB21	3.3608e-13	0.477367	0.441	0.287	1.51871e-08	C06 - CD4+ Tfh : CXCL13 ADT-PD1	TCEB2
PSMA11	3.50463e-13	0.437728	0.546	0.382	1.58371e-08	C06 - CD4+ Tfh : CXCL13 ADT-PD1	PSMA1
C3orf381	3.77556e-13	0.320225	0.246	0.113	1.70614e-08	C06 - CD4+ Tfh : CXCL13 ADT-PD1	C3orf38
TSPAN17	4.13481e-13	0.323174	0.186	0.074	1.86848e-08	C06 - CD4+ Tfh : CXCL13 ADT-PD1	TSPAN17
AHSA11	4.55417e-13	0.446453	0.586	0.423	2.05799e-08	C06 - CD4+ Tfh : CXCL13 ADT-PD1	AHSA1
KCTD17	5.15415e-13	0.324236	0.143	0.055	2.32911e-08	C06 - CD4+ Tfh : CXCL13 ADT-PD1	KCTD17
PRDM11	6.49595e-13	0.596461	0.423	0.294	2.93546e-08	C06 - CD4+ Tfh : CXCL13 ADT-PD1	PRDM1
FYB	7.11799e-13	0.538051	0.528	0.364	3.21655e-08	C06 - CD4+ Tfh : CXCL13 ADT-PD1	FYB
PARVB	7.28e-13	0.294957	0.15	0.054	3.28976e-08	C06 - CD4+ Tfh : CXCL13 ADT-PD1	PARVB
C16orf871	7.98577e-13	0.371624	0.219	0.101	3.60869e-08	C06 - CD4+ Tfh : CXCL13 ADT-PD1	C16orf87
PRR5L	8.41671e-13	0.269944	0.141	0.047	3.80343e-08	C06 - CD4+ Tfh : CXCL13 ADT-PD1	PRR5L
WNK1	9.78574e-13	0.442464	0.528	0.371	4.42208e-08	C06 - CD4+ Tfh : CXCL13 ADT-PD1	WNK1
GALM1	1.02877e-12	0.458993	0.387	0.233	4.64893e-08	C06 - CD4+ Tfh : CXCL13 ADT-PD1	GALM
COX8A1	1.09845e-12	0.376639	0.74	0.586	4.96377e-08	C06 - CD4+ Tfh : CXCL13 ADT-PD1	COX8A
PPP4R21	1.23173e-12	0.409807	0.407	0.26	5.56605e-08	C06 - CD4+ Tfh : CXCL13 ADT-PD1	PPP4R2
PPM1G1	1.27365e-12	0.409297	0.452	0.296	5.75548e-08	C06 - CD4+ Tfh : CXCL13 ADT-PD1	PPM1G
[truncated: 6,875 more rows]

## Sheet: All_TIL_ADT_onlypos_markers
	p_val	avg_log2FC	pct.1	pct.2	p_val_adj	cluster	gene
CITE-CD4	2.3928e-118	0.569112	0.998	0.916	3.11064e-116	C01 - CD4+ Th : RPL7 ADT-CD49fmid	CITE-CD4
CITE-CD5	5.49649e-92	0.86433	1	0.993	7.14543e-90	C01 - CD4+ Th : RPL7 ADT-CD49fmid	CITE-CD5
CITE-CD47	1.22626e-87	0.355281	1	1	1.59414e-85	C01 - CD4+ Th : RPL7 ADT-CD49fmid	CITE-CD47
CITE-CD48	7.1679e-58	0.431153	1	0.999	9.31827e-56	C01 - CD4+ Th : RPL7 ADT-CD49fmid	CITE-CD48
CITE-CD49f	2.75237e-56	0.317969	0.993	0.944	3.57808e-54	C01 - CD4+ Th : RPL7 ADT-CD49fmid	CITE-CD49f
CITE-TCRab	1.10678e-49	0.302536	0.999	0.984	1.43881e-47	C01 - CD4+ Th : RPL7 ADT-CD49fmid	CITE-TCRab
CITE-CD3	1.775e-44	0.335344	1	0.999	2.3075e-42	C01 - CD4+ Th : RPL7 ADT-CD49fmid	CITE-CD3
CITE-CD2	4.0135e-32	0.299308	1	0.999	5.21755e-30	C01 - CD4+ Th : RPL7 ADT-CD49fmid	CITE-CD2
CITE-CCR4	3.04588e-18	0.677556	0.999	0.991	3.95965e-16	C01 - CD4+ Th : RPL7 ADT-CD49fmid	CITE-CCR4
CITE-CD49f1	1.10205e-122	0.595936	0.991	0.944	1.43267e-120	C02 - CD4+ Th : GPR183 ADT-CD49fhi	CITE-CD49f
CITE-CD471	1.20055e-89	0.54557	1	1	1.56071e-87	C02 - CD4+ Th : GPR183 ADT-CD49fhi	CITE-CD47
CITE-CD41	7.30963e-63	0.395705	0.989	0.918	9.50252e-61	C02 - CD4+ Th : GPR183 ADT-CD49fhi	CITE-CD4
CITE-CD481	1.37708e-52	0.446266	1	0.999	1.7902e-50	C02 - CD4+ Th : GPR183 ADT-CD49fhi	CITE-CD48
CITE-CD51	4.08313e-32	0.39216	1	0.993	5.30806e-30	C02 - CD4+ Th : GPR183 ADT-CD49fhi	CITE-CD5
CITE-CD8A	0.000000000000000000000000000000000000000000000000000000000000000000000000000000000000000000000000000000000000000000000000000000000000000000000000000000000000000000000000000000000000000000000000000000000000000000000000000000000000000000000000000000000442410336093179	1.40016	0.999	0.988	0.0000000000000000000000000000000000000000000000000000000000000000000000000000000000000000000000000000000000000000000000000000000000000000000000000000000000000000000000000000000000000000000000000000000000000000000000000000000000000000000000000000000575133436921133	C03 - CD8+ CTL : GZMK ADT-NKG2Dhi	CITE-CD8A
CITE-NKG2D	1.1884e-154	0.716478	0.994	0.934	1.54492e-152	C03 - CD8+ CTL : GZMK ADT-NKG2Dhi	CITE-NKG2D
CITE-2B4	2.62485e-138	0.728976	0.993	0.882	3.41231e-136	C03 - CD8+ CTL : GZMK ADT-NKG2Dhi	CITE-2B4
CITE-CD49a	3.11899e-56	0.454905	0.99	0.972	4.05469e-54	C03 - CD8+ CTL : GZMK ADT-NKG2Dhi	CITE-CD49a
CITE-CD103	4.60886e-39	0.308373	0.919	0.892	5.99152e-37	C03 - CD8+ CTL : GZMK ADT-NKG2Dhi	CITE-CD103
CITE-CD482	3.05087e-22	0.252427	1	0.999	3.96614e-20	C03 - CD8+ CTL : GZMK ADT-NKG2Dhi	CITE-CD48
CITE-CD8A1	2.05164e-110	1.09038	0.997	0.989	2.66714e-108	C04 - CD8+ CTL : METRNL ADT-NKG2Dmid	CITE-CD8A
CITE-NKG2D1	5.81488e-97	0.602037	0.995	0.934	7.55934e-95	C04 - CD8+ CTL : METRNL ADT-NKG2Dmid	CITE-NKG2D
CITE-2B41	2.84656e-75	0.531683	0.994	0.883	3.70052e-73	C04 - CD8+ CTL : METRNL ADT-NKG2Dmid	CITE-2B4
CITE-CD49a1	2.31176e-46	0.368404	0.998	0.971	3.00529e-44	C04 - CD8+ CTL : METRNL ADT-NKG2Dmid	CITE-CD49a
CITE-CD1031	1.12428e-39	0.407912	0.95	0.889	1.46156e-37	C04 - CD8+ CTL : METRNL ADT-NKG2Dmid	CITE-CD103
CITE-CD69	7.86887e-34	0.561643	1	0.996	1.02295e-31	C04 - CD8+ CTL : METRNL ADT-NKG2Dmid	CITE-CD69
CITE-CD31	1.30792e-32	0.277781	0.984	0.892	1.70029e-30	C04 - CD8+ CTL : METRNL ADT-NKG2Dmid	CITE-CD31
CITE-ICOS	0	2.40061	1	0.992	0	C05 - CD4+ Treg : TNFRSF9 ADT-4.1BB	CITE-ICOS
CITE-CD39	0	1.90917	1	0.994	0	C05 - CD4+ Treg : TNFRSF9 ADT-4.1BB	CITE-CD39
CITE-FAS	0	1.1517	1	0.996	0	C05 - CD4+ Treg : TNFRSF9 ADT-4.1BB	CITE-FAS
CITE-GITR	0.000000000000000000000000000000000000000000000000000000000000000000000000000000000000000000000000000000000000000000000000000000000000000000000000000000000000000000000000000000000000000000000000000000000000000000000000000000000000000000000000000000000000000000000000000000000000000000000100783979671003	0.952793	0.998	0.954	0.0000000000000000000000000000000000000000000000000000000000000000000000000000000000000000000000000000000000000000000000000000000000000000000000000000000000000000000000000000000000000000000000000000000000000000000000000000000000000000000000000000000000000000000000000000000000000000000131019173572304	C05 - CD4+ Treg : TNFRSF9 ADT-4.1BB	CITE-GITR
CITE-CD25	0.00000000000000000000000000000000000000000000000000000000000000000000000000000000000000000000000000000000000000000000000000000000000000000000000000000000000000000000000000000000000000000000000000000000000000000000000000000000000000000000000000000000000000000000000000000000000000000000130361941048611	0.921295	0.97	0.848	0.000000000000000000000000000000000000000000000000000000000000000000000000000000000000000000000000000000000000000000000000000000000000000000000000000000000000000000000000000000000000000000000000000000000000000000000000000000000000000000000000000000000000000000000000000000000000000000169470523363195	C05 - CD4+ Treg : TNFRSF9 ADT-4.1BB	CITE-CD25
CITE-4.1BB	3.29996e-168	0.556477	0.878	0.706	4.28995e-166	C05 - CD4+ Treg : TNFRSF9 ADT-4.1BB	CITE-4.1BB
CITE-CD42	1.06611e-101	0.643721	0.997	0.919	1.38594e-99	C05 - CD4+ Treg : TNFRSF9 ADT-4.1BB	CITE-CD4
CITE-TIGIT	1.20404e-90	0.346017	0.898	0.79	1.56525e-88	C05 - CD4+ Treg : TNFRSF9 ADT-4.1BB	CITE-TIGIT
CITE-TCRab1	4.74063e-82	0.576032	0.998	0.985	6.16281e-80	C05 - CD4+ Treg : TNFRSF9 ADT-4.1BB	CITE-TCRab
CITE-CD27	2.7416e-69	0.500527	0.993	0.977	3.56407e-67	C05 - CD4+ Treg : TNFRSF9 ADT-4.1BB	CITE-CD27
CITE-CD52	2.69018e-64	0.718972	1	0.994	3.49723e-62	C05 - CD4+ Treg : TNFRSF9 ADT-4.1BB	CITE-CD5
CITE-MCAM	1.12887e-63	0.40687	0.867	0.795	1.46753e-61	C05 - CD4+ Treg : TNFRSF9 ADT-4.1BB	CITE-MCAM
CITE-CD28	4.38544e-61	0.318967	0.993	0.982	5.70107e-59	C05 - CD4+ Treg : TNFRSF9 ADT-4.1BB	CITE-CD28
CITE-CD32	2.23256e-50	0.504768	1	0.999	2.90233e-48	C05 - CD4+ Treg : TNFRSF9 ADT-4.1BB	CITE-CD3
CITE-HLA.DR	1.40271e-48	0.416506	0.967	0.911	1.82352e-46	C05 - CD4+ Treg : TNFRSF9 ADT-4.1BB	CITE-HLA.DR
CITE-CD62L	2.74402e-18	0.274616	0.972	0.977	3.56723e-16	C05 - CD4+ Treg : TNFRSF9 ADT-4.1BB	CITE-CD62L
CITE-CD21	1.19715e-16	0.304938	1	0.999	1.55629e-14	C05 - CD4+ Treg : TNFRSF9 ADT-4.1BB	CITE-CD2
CITE-Podoplanin	0.00944242	0.522579	0.796	0.839	1	C05 - CD4+ Treg : TNFRSF9 ADT-4.1BB	CITE-Podoplanin
CITE-PD1	2.19319e-95	0.496446	0.861	0.663	2.85115e-93	C06 - CD4+ Tfh : CXCL13 ADT-PD1	CITE-PD1
CITE-CD43	1.29867e-44	0.464051	0.998	0.921	1.68827e-42	C06 - CD4+ Tfh : CXCL13 ADT-PD1	CITE-CD4
CITE-CD391	1.16309e-30	0.337929	1	0.994	1.51202e-28	C06 - CD4+ Tfh : CXCL13 ADT-PD1	CITE-CD39
CITE-CD49b	3.83248e-18	0.252605	0.978	0.925	4.98223e-16	C06 - CD4+ Tfh : CXCL13 ADT-PD1	CITE-CD49b
CITE-CD22	4.64124e-12	0.332027	0.998	0.999	6.03361e-10	C06 - CD4+ Tfh : CXCL13 ADT-PD1	CITE-CD2
CITE-CD33	2.993e-10	0.255016	1	0.999	3.8909e-08	C06 - CD4+ Tfh : CXCL13 ADT-PD1	CITE-CD3
CITE-CD691	3.07398e-09	0.265955	0.998	0.996	3.99618e-07	C06 - CD4+ Tfh : CXCL13 ADT-PD1	CITE-CD69
CITE-CD86	5.7244e-06	0.274478	0.81	0.781	0.000744173	C06 - CD4+ Tfh : CXCL13 ADT-PD1	CITE-CD86
CITE-ICOS1	4.31141e-84	1.05547	1	0.992	5.60483e-82	C07 - R-CD4+ Treg : IKZF2 ADT-ICOSmid	CITE-ICOS
CITE-CD392	8.34813e-70	0.770101	1	0.994	1.08526e-67	C07 - R-CD4+ Treg : IKZF2 ADT-ICOSmid	CITE-CD39
CITE-FAS1	6.97627e-61	0.537788	1	0.996	9.06916e-59	C07 - R-CD4+ Treg : IKZF2 ADT-ICOSmid	CITE-FAS
CITE-CD44	7.81195e-39	0.397779	1	0.921	1.01555e-36	C07 - R-CD4+ Treg : IKZF2 ADT-ICOSmid	CITE-CD4
CITE-CD251	2.36229e-29	0.307913	0.912	0.854	3.07097e-27	C07 - R-CD4+ Treg : IKZF2 ADT-ICOSmid	CITE-CD25
CITE-TCRab2	3.53969e-27	0.402382	0.988	0.986	4.60159e-25	C07 - R-CD4+ Treg : IKZF2 ADT-ICOSmid	CITE-TCRab
CITE-GITR1	1.67432e-26	0.261196	0.991	0.956	2.17661e-24	C07 - R-CD4+ Treg : IKZF2 ADT-ICOSmid	CITE-GITR
CITE-CD271	1.05297e-22	0.325927	0.984	0.978	1.36887e-20	C07 - R-CD4+ Treg : IKZF2 ADT-ICOSmid	CITE-CD27
CITE-CD53	2.82607e-12	0.306874	1	0.994	3.6739e-10	C07 - R-CD4+ Treg : IKZF2 ADT-ICOSmid	CITE-CD5
CITE-CD34	3.181e-12	0.293702	1	0.999	4.1353e-10	C07 - R-CD4+ Treg : IKZF2 ADT-ICOSmid	CITE-CD3
CITE-CD8A2	3.28871e-116	1.33224	1	0.989	4.27532e-114	C08 - CD8+ CTL : ZNF683 ADT-CD57hi	CITE-CD8A
CITE-2B42	6.56719e-106	0.875701	0.995	0.887	8.53735e-104	C08 - CD8+ CTL : ZNF683 ADT-CD57hi	CITE-2B4
CITE-CD57	1.12563e-78	1.02125	0.924	0.763	1.46331e-76	C08 - CD8+ CTL : ZNF683 ADT-CD57hi	CITE-CD57
CITE-CD49a2	1.68879e-72	0.882149	0.99	0.973	2.19542e-70	C08 - CD8+ CTL : ZNF683 ADT-CD57hi	CITE-CD49a
CITE-NKG2D2	4.61809e-71	0.610457	0.987	0.937	6.00351e-69	C08 - CD8+ CTL : ZNF683 ADT-CD57hi	CITE-NKG2D
CITE-CD1032	1.7439e-68	1.02797	0.945	0.892	2.26706e-66	C08 - CD8+ CTL : ZNF683 ADT-CD57hi	CITE-CD103
CITE-CD311	1.09459e-15	0.33389	0.937	0.898	1.42296e-13	C08 - CD8+ CTL : ZNF683 ADT-CD57hi	CITE-CD31
CITE-CD692	1.89983e-14	0.466902	0.992	0.997	2.46978e-12	C08 - CD8+ CTL : ZNF683 ADT-CD57hi	CITE-CD69
CITE-CD38	0.000412235	0.349439	0.957	0.933	0.0535906	C08 - CD8+ CTL : ZNF683 ADT-CD57hi	CITE-CD38
CITE-NKP46	4.67247e-114	0.537443	0.837	0.612	6.07421e-112	C09 - NK : TYROBP ADT-NKP46	CITE-NKP46
CITE-2B43	3.2967e-94	0.940529	0.985	0.887	4.28571e-92	C09 - NK : TYROBP ADT-NKP46	CITE-2B4
CITE-CD1033	1.07612e-68	1.51337	0.92	0.893	1.39895e-66	C09 - NK : TYROBP ADT-NKP46	CITE-CD103
CITE-CD49a3	9.83075e-64	1.0536	0.975	0.973	1.278e-61	C09 - NK : TYROBP ADT-NKP46	CITE-CD49a
CITE-NKG2D3	7.19006e-56	0.60622	0.997	0.936	9.34707e-54	C09 - NK : TYROBP ADT-NKP46	CITE-NKG2D
CITE-CD16	1.55354e-41	0.33226	0.732	0.742	2.0196e-39	C09 - NK : TYROBP ADT-NKP46	CITE-CD16
CITE-CD11C	1.58969e-35	0.663441	0.955	0.96	2.06659e-33	C09 - NK : TYROBP ADT-NKP46	CITE-CD11C
CITE-CD381	9.55831e-20	0.276937	0.965	0.933	1.24258e-17	C09 - NK : TYROBP ADT-NKP46	CITE-CD38
CITE-CD312	8.55792e-18	0.26785	0.957	0.897	1.11253e-15	C09 - NK : TYROBP ADT-NKP46	CITE-CD31
CITE-CD11b	1.17077e-13	0.271877	0.99	0.946	1.52201e-11	C09 - NK : TYROBP ADT-NKP46	CITE-CD11b
CITE-CD693	2.5923e-07	0.529635	0.982	0.997	3.36999e-05	C09 - NK : TYROBP ADT-NKP46	CITE-CD69
CITE-IgG.Fc	0	3.03527	1	1	0	C11 - R-ILC : RPL38 ADT-IgG.Fc	CITE-IgG.Fc
CITE-IgM	0	2.24797	1	1	0	C11 - R-ILC : RPL38 ADT-IgG.Fc	CITE-IgM
CITE-CD11b1	0.0000000000000000000000000000000000000000000000000000000000000000000000000000000000000000000000000000000000000000000000000000000000000000000000000000000000000000000000000000000000000000000000000000000000000000000000000000000000000000000000000000000000000000000000000000000000000000000000000000000000000000000000000137459132076743	1.67999	1	0.946	0.00000000000000000000000000000000000000000000000000000000000000000000000000000000000000000000000000000000000000000000000000000000000000000000000000000000000000000000000000000000000000000000000000000000000000000000000000000000000000000000000000000000000000000000000000000000000000000000000000000000000000000000000178696871699766	C11 - R-ILC : RPL38 ADT-IgG.Fc	CITE-CD11b
CITE-CD11C1	0.0000000000000000000000000000000000000000000000000000000000000000000000000000000000000000000000000000000000000000000000000000000000000000000000000000000000000000000000000000000000000000000000000000000000000000000000000000000000000000000000000000000000000000000000000000000000000000000000123461291669114	1.71959	1	0.958	0.00000000000000000000000000000000000000000000000000000000000000000000000000000000000000000000000000000000000000000000000000000000000000000000000000000000000000000000000000000000000000000000000000000000000000000000000000000000000000000000000000000000000000000000000000000000000000000000160499679169848	C11 - R-ILC : RPL38 ADT-IgG.Fc	CITE-CD11C
CITE-CD141	0.00000000000000000000000000000000000000000000000000000000000000000000000000000000000000000000000000000000000000000000000000000000000000000000000000000000000000000000000000000000000000000000000000000000000000000000000000000000000000000000000000000000000000000000000787335961437499	1.11638	1	0.93	0.00000000000000000000000000000000000000000000000000000000000000000000000000000000000000000000000000000000000000000000000000000000000000000000000000000000000000000000000000000000000000000000000000000000000000000000000000000000000000000000000000000000000000000000102353674986875	C11 - R-ILC : RPL38 ADT-IgG.Fc	CITE-CD141
CITE-CD133	0.00000000000000000000000000000000000000000000000000000000000000000000000000000000000000000000000000000000000000000000000000000000000000000000000000000000000000000000000000000000000000000000000000000000000000000000000000000000000000000000000000183411937266559	0.974455	1	0.998	0.000000000000000000000000000000000000000000000000000000000000000000000000000000000000000000000000000000000000000000000000000000000000000000000000000000000000000000000000000000000000000000000000000000000000000000000000000000000000000000000000238435518446527	C11 - R-ILC : RPL38 ADT-IgG.Fc	CITE-CD133
CITE-HLA.DR1	1.19651e-191	1.15389	1	0.912	1.55546e-189	C11 - R-ILC : RPL38 ADT-IgG.Fc	CITE-HLA.DR
CITE-CD861	3.72188e-137	0.858762	0.997	0.774	4.83845e-135	C11 - R-ILC : RPL38 ADT-IgG.Fc	CITE-CD86
CITE-CD313	7.03575e-135	0.978336	1	0.896	9.14648e-133	C11 - R-ILC : RPL38 ADT-IgG.Fc	CITE-CD31
CITE-CD14	2.2056e-129	0.617988	0.997	0.936	2.86728e-127	C11 - R-ILC : RPL38 ADT-IgG.Fc	CITE-CD14
CITE-CD112	4.19637e-127	0.926868	0.997	0.863	5.45528e-125	C11 - R-ILC : RPL38 ADT-IgG.Fc	CITE-CD112
CITE-CD115	6.97716e-112	0.490981	0.997	0.786	9.07031e-110	C11 - R-ILC : RPL38 ADT-IgG.Fc	CITE-CD115
CITE-LFA.3	4.01972e-96	1.44083	1	0.929	5.22564e-94	C11 - R-ILC : RPL38 ADT-IgG.Fc	CITE-LFA.3
CITE-PDL1	5.28207e-91	0.503065	0.98	0.785	6.8667e-89	C11 - R-ILC : RPL38 ADT-IgG.Fc	CITE-PDL1
CITE-B7H3	1.56122e-89	0.663609	0.997	0.881	2.02959e-87	C11 - R-ILC : RPL38 ADT-IgG.Fc	CITE-B7H3
CITE-CD49d	2.18481e-82	0.577666	1	0.991	2.84026e-80	C11 - R-ILC : RPL38 ADT-IgG.Fc	CITE-CD49d
CITE-IgD	3.0679e-77	0.517474	0.962	0.592	3.98827e-75	C11 - R-ILC : RPL38 ADT-IgG.Fc	CITE-IgD
CITE-CD472	6.90305e-60	0.710724	1	1	8.97397e-58	C11 - R-ILC : RPL38 ADT-IgG.Fc	CITE-CD47
CITE-Podoplanin1	7.00453e-48	0.302781	0.983	0.83	9.10588e-46	C11 - R-ILC : RPL38 ADT-IgG.Fc	CITE-Podoplanin
CITE-CD49f2	5.21988e-39	0.452732	1	0.947	6.78584e-37	C11 - R-ILC : RPL38 ADT-IgG.Fc	CITE-CD49f
CITE-CD40L	6.13235e-29	0.265955	0.922	0.671	7.97206e-27	C11 - R-ILC : RPL38 ADT-IgG.Fc	CITE-CD40L
CITE-Thy1	2.27121e-28	0.365749	0.997	0.934	2.95257e-26	C11 - R-ILC : RPL38 ADT-IgG.Fc	CITE-Thy1
CITE-CD382	2.99939e-26	0.520079	0.997	0.932	3.89921e-24	C11 - R-ILC : RPL38 ADT-IgG.Fc	CITE-CD38
CITE-CD66a.c.e	1.08489e-18	0.345313	1	0.976	1.41036e-16	C11 - R-ILC : RPL38 ADT-IgG.Fc	CITE-CD66a.c.e
CITE-OX40	5.4436e-101	0.704658	1	0.999	7.07667e-99	C13 - R-Tgd/ILC : C6orf48 ADT-TCRgd	CITE-OX40
CITE-CD45RA	4.69795e-92	0.567993	1	0.999	6.10733e-90	C13 - R-Tgd/ILC : C6orf48 ADT-TCRgd	CITE-CD45RA
CITE-KLRG1	1.01194e-89	0.987292	1	1	1.31552e-87	C13 - R-Tgd/ILC : C6orf48 ADT-TCRgd	CITE-KLRG1
CITE-CCR6	1.52839e-89	0.66706	1	1	1.98691e-87	C13 - R-Tgd/ILC : C6orf48 ADT-TCRgd	CITE-CCR6
CITE-TCRgd	1.50037e-78	0.531744	1	0.999	1.95048e-76	C13 - R-Tgd/ILC : C6orf48 ADT-TCRgd	CITE-TCRgd
CITE-TIM3	4.01677e-68	0.452081	1	0.996	5.2218e-66	C13 - R-Tgd/ILC : C6orf48 ADT-TCRgd	CITE-TIM3
CITE-CXCR3	1.58954e-58	0.555447	1	0.982	2.06641e-56	C13 - R-Tgd/ILC : C6orf48 ADT-TCRgd	CITE-CXCR3
CITE-HER2	2.40167e-50	0.459977	1	0.997	3.12217e-48	C13 - R-Tgd/ILC : C6orf48 ADT-TCRgd	CITE-HER2
CITE-CD1C	1.49863e-42	0.372826	1	0.976	1.94822e-40	C13 - R-Tgd/ILC : C6orf48 ADT-TCRgd	CITE-CD1C
CITE-CD341	2.02519e-40	0.421589	0.987	0.924	2.63275e-38	C13 - R-Tgd/ILC : C6orf48 ADT-TCRgd	CITE-CD34
CITE-CD142	4.98711e-35	0.365205	1	0.936	6.48324e-33	C13 - R-Tgd/ILC : C6orf48 ADT-TCRgd	CITE-CD14
CITE-CCR41	2.18548e-30	0.40159	1	0.992	2.84113e-28	C13 - R-Tgd/ILC : C6orf48 ADT-TCRgd	CITE-CCR4
CITE-CRTH2	6.9272e-30	0.427261	0.996	0.966	9.00535e-28	C13 - R-Tgd/ILC : C6orf48 ADT-TCRgd	CITE-CRTH2
CITE-CD62L1	5.31729e-29	0.334812	1	0.975	6.91248e-27	C13 - R-Tgd/ILC : C6orf48 ADT-TCRgd	CITE-CD62L
CITE-CD19	1.37193e-25	0.261719	0.987	0.883	1.78351e-23	C13 - R-Tgd/ILC : C6orf48 ADT-TCRgd	CITE-CD19
CITE-CD163	2.79756e-24	0.269512	0.974	0.879	3.63683e-22	C13 - R-Tgd/ILC : C6orf48 ADT-TCRgd	CITE-CD163
CITE-B7H31	1.35398e-21	0.287273	0.987	0.883	1.76018e-19	C13 - R-Tgd/ILC : C6orf48 ADT-TCRgd	CITE-B7H3
CITE-Thy11	3.44421e-20	0.414073	1	0.935	4.47748e-18	C13 - R-Tgd/ILC : C6orf48 ADT-TCRgd	CITE-Thy1
CITE-CD66a.c.e1	2.73532e-18	0.262378	0.996	0.976	3.55592e-16	C13 - R-Tgd/ILC : C6orf48 ADT-TCRgd	CITE-CD66a.c.e
CITE-ICOSL	3.14033e-14	0.287894	0.966	0.902	4.08243e-12	C13 - R-Tgd/ILC : C6orf48 ADT-TCRgd	CITE-ICOSL
CITE-FAS2	6.54942e-25	0.559637	1	0.996	8.51425e-23	C14 - Prolif Lymph : MKI67	CITE-FAS
CITE-CD23	1.42501e-23	0.708531	1	0.999	1.85251e-21	C14 - Prolif Lymph : MKI67	CITE-CD2
CITE-CD393	3.44681e-23	0.801131	1	0.994	4.48085e-21	C14 - Prolif Lymph : MKI67	CITE-CD39
CITE-PD11	2.6521e-22	0.322646	0.783	0.671	3.44773e-20	C14 - Prolif Lymph : MKI67	CITE-PD1
CITE-ICOS2	6.3483e-20	1.0505	1	0.993	8.2528e-18	C14 - Prolif Lymph : MKI67	CITE-ICOS
CITE-CD1034	1.73813e-16	1.53997	0.935	0.893	2.25957e-14	C14 - Prolif Lymph : MKI67	CITE-CD103
CITE-HLA.DR2	1.44006e-15	0.411228	0.974	0.914	1.87208e-13	C14 - Prolif Lymph : MKI67	CITE-HLA.DR
CITE-CD54	3.60123e-14	0.806624	1	0.994	4.6816e-12	C14 - Prolif Lymph : MKI67	CITE-CD5
CITE-CD694	2.51347e-11	0.455082	1	0.996	3.26751e-09	C14 - Prolif Lymph : MKI67	CITE-CD69
CITE-GITR2	1.38147e-10	0.39493	0.974	0.957	1.79591e-08	C14 - Prolif Lymph : MKI67	CITE-GITR
CITE-2B44	1.62778e-10	0.477213	0.887	0.893	2.11612e-08	C14 - Prolif Lymph : MKI67	CITE-2B4
CITE-CD252	2.72425e-10	0.379286	0.922	0.856	3.54153e-08	C14 - Prolif Lymph : MKI67	CITE-CD25
CITE-CD49b1	2.69609e-06	0.2896	0.952	0.927	0.000350492	C14 - Prolif Lymph : MKI67	CITE-CD49b
CITE-CD49a4	9.27555e-05	0.690223	0.978	0.973	0.0120582	C14 - Prolif Lymph : MKI67	CITE-CD49a
CITE-CD8A3	0.000491193	0.508135	0.996	0.989	0.0638551	C14 - Prolif Lymph : MKI67	CITE-CD8A
CITE-NKG2D4	0.000705718	0.286406	0.948	0.939	0.0917434	C14 - Prolif Lymph : MKI67	CITE-NKG2D
CITE-CD45	0.00287558	0.279603	0.891	0.926	0.373825	C14 - Prolif Lymph : MKI67	CITE-CD4
CITE-CD571	0.00366068	0.454376	0.848	0.769	0.475889	C14 - Prolif Lymph : MKI67	CITE-CD57
CITE-CD1035	2.18667e-135	2.70887	0.959	0.893	2.84268e-133	C15 - CD8+ Trm : HAVCR2 CITE-CD103hi	CITE-CD103
CITE-CD49b2	4.72206e-56	0.663341	0.969	0.927	6.13867e-54	C15 - CD8+ Trm : HAVCR2 CITE-CD103hi	CITE-CD49b
CITE-2B45	2.96812e-50	0.892682	0.99	0.89	3.85855e-48	C15 - CD8+ Trm : HAVCR2 CITE-CD103hi	CITE-2B4
CITE-CD8A4	2.93248e-47	1.22685	1	0.989	3.81223e-45	C15 - CD8+ Trm : HAVCR2 CITE-CD103hi	CITE-CD8A
CITE-PD12	2.19722e-40	0.467208	0.883	0.669	2.85639e-38	C15 - CD8+ Trm : HAVCR2 CITE-CD103hi	CITE-PD1
CITE-CD49a5	2.43279e-34	0.87513	0.98	0.973	3.16263e-32	C15 - CD8+ Trm : HAVCR2 CITE-CD103hi	CITE-CD49a
CITE-CD695	2.33046e-27	0.765642	1	0.996	3.0296e-25	C15 - CD8+ Trm : HAVCR2 CITE-CD103hi	CITE-CD69
CITE-CD272	1.64807e-22	0.429854	0.995	0.978	2.14249e-20	C15 - CD8+ Trm : HAVCR2 CITE-CD103hi	CITE-CD27
CITE-CD572	8.1556e-22	0.8075	0.796	0.771	1.06023e-19	C15 - CD8+ Trm : HAVCR2 CITE-CD103hi	CITE-CD57
CITE-TCRVa7.2	1.24221e-12	0.437274	0.842	0.86	1.61488e-10	C15 - CD8+ Trm : HAVCR2 CITE-CD103hi	CITE-TCRVa7.2
CITE-CD24	9.0255e-09	0.340578	1	0.999	1.17331e-06	C15 - CD8+ Trm : HAVCR2 CITE-CD103hi	CITE-CD2
CITE-CD394	1.06219e-08	0.265428	1	0.994	1.38085e-06	C15 - CD8+ Trm : HAVCR2 CITE-CD103hi	CITE-CD39
CITE-CD862	6.07725e-07	0.450306	0.811	0.782	7.90043e-05	C15 - CD8+ Trm : HAVCR2 CITE-CD103hi	CITE-CD86
CITE-4.1BBL	0.00464763	0.424677	0.577	0.649	0.604192	C15 - CD8+ Trm : HAVCR2 CITE-CD103hi	CITE-4.1BBL
CITE-CD46	7.37693e-31	0.633156	1	0.924	9.59001e-29	C16 - CD4+ T : IFNG ADT-CCR5	CITE-CD4
CITE-CD55	1.81362e-25	0.890973	1	0.994	2.35771e-23	C16 - CD4+ T : IFNG ADT-CCR5	CITE-CD5
CITE-TCRab3	3.57874e-21	0.476303	1	0.986	4.65236e-19	C16 - CD4+ T : IFNG ADT-CCR5	CITE-TCRab
CITE-CD483	5.46673e-15	0.456223	1	0.999	7.10674e-13	C16 - CD4+ T : IFNG ADT-CCR5	CITE-CD48
CITE-PD13	4.31498e-13	0.259138	0.881	0.67	5.60948e-11	C16 - CD4+ T : IFNG ADT-CCR5	CITE-PD1
CITE-CD35	4.72888e-13	0.379311	1	0.999	6.14754e-11	C16 - CD4+ T : IFNG ADT-CCR5	CITE-CD3
CITE-CD45RO	7.04715e-12	0.263466	1	0.992	9.1613e-10	C16 - CD4+ T : IFNG ADT-CCR5	CITE-CD45RO
CITE-CD26	4.02305e-11	0.438811	1	0.999	5.22997e-09	C16 - CD4+ T : IFNG ADT-CCR5	CITE-CD2
CITE-CCR5	5.79042e-09	0.286228	1	0.986	7.52755e-07	C16 - CD4+ T : IFNG ADT-CCR5	CITE-CCR5
CITE-CD241	1.68136e-213	1.34583	0.972	0.813	2.18577e-211	C17 - R-ILC : RACK1 ADT-CD24	CITE-CD24
CITE-B7H32	5.56891e-189	1.35149	1	0.884	7.23958e-187	C17 - R-ILC : RACK1 ADT-CD24	CITE-B7H3
CITE-EPCAM	7.08169e-144	1.90071	0.95	0.65	9.2062e-142	C17 - R-ILC : RACK1 ADT-CD24	CITE-EPCAM
CITE-Podoplanin2	8.99952e-110	0.747233	1	0.833	1.16994e-107	C17 - R-ILC : RACK1 ADT-CD24	CITE-Podoplanin
CITE-HER21	6.71745e-97	0.784998	1	0.997	8.73268e-95	C17 - R-ILC : RACK1 ADT-CD24	CITE-HER2
CITE-CD66a.c.e2	1.34622e-95	1.25381	1	0.976	1.75009e-93	C17 - R-ILC : RACK1 ADT-CD24	CITE-CD66a.c.e
CITE-Thy12	3.48416e-94	1.26254	1	0.936	4.52941e-92	C17 - R-ILC : RACK1 ADT-CD24	CITE-Thy1
CITE-CD11C2	7.93461e-86	1.26924	1	0.959	1.0315e-83	C17 - R-ILC : RACK1 ADT-CD24	CITE-CD11C
CITE-cKIT	2.36282e-80	0.614271	0.972	0.659	3.07166e-78	C17 - R-ILC : RACK1 ADT-CD24	CITE-cKIT
CITE-CD1121	3.86104e-79	0.715496	0.993	0.866	5.01935e-77	C17 - R-ILC : RACK1 ADT-CD24	CITE-CD112
CITE-CD73	7.67403e-70	0.641026	1	0.973	9.97624e-68	C17 - R-ILC : RACK1 ADT-CD24	CITE-CD73
CITE-CD1411	1.02046e-65	0.765352	1	0.932	1.32659e-63	C17 - R-ILC : RACK1 ADT-CD24	CITE-CD141
CITE-CD11b2	1.2468e-60	0.972295	1	0.947	1.62084e-58	C17 - R-ILC : RACK1 ADT-CD24	CITE-CD11b
CITE-CD49b3	1.07546e-58	0.734341	1	0.926	1.3981e-56	C17 - R-ILC : RACK1 ADT-CD24	CITE-CD49b
CITE-CD15	7.17513e-53	0.655785	0.922	0.593	9.32766e-51	C17 - R-ILC : RACK1 ADT-CD24	CITE-CD15
CITE-CD66b	7.02974e-44	1.42654	0.986	0.794	9.13866e-42	C17 - R-ILC : RACK1 ADT-CD24	CITE-CD66b
CITE-ICOSL1	9.35005e-39	0.905658	1	0.902	1.21551e-36	C17 - R-ILC : RACK1 ADT-CD24	CITE-ICOSL
CITE-CD203c	2.24609e-37	0.392115	0.482	0.353	2.91992e-35	C17 - R-ILC : RACK1 ADT-CD24	CITE-CD203c
CITE-LFA.31	3.67502e-36	0.652252	1	0.931	4.77752e-34	C17 - R-ILC : RACK1 ADT-CD24	CITE-LFA.3
CITE-CD473	4.50433e-36	0.614013	1	1	5.85562e-34	C17 - R-ILC : RACK1 ADT-CD24	CITE-CD47
CITE-HLA.DR3	4.4336e-35	0.670323	1	0.914	5.76368e-33	C17 - R-ILC : RACK1 ADT-CD24	CITE-HLA.DR
CITE-CD314	4.46552e-35	0.629055	1	0.898	5.80518e-33	C17 - R-ILC : RACK1 ADT-CD24	CITE-CD31
CITE-CD863	2.63583e-32	0.521774	1	0.779	3.42657e-30	C17 - R-ILC : RACK1 ADT-CD24	CITE-CD86
CITE-CCR61	3.36693e-32	0.452532	1	1	4.377e-30	C17 - R-ILC : RACK1 ADT-CD24	CITE-CCR6
CITE-IgD1	3.74212e-30	0.251896	0.95	0.6	4.86476e-28	C17 - R-ILC : RACK1 ADT-CD24	CITE-IgD
CITE-CD441	3.97551e-28	0.361381	0.95	0.713	5.16817e-26	C17 - R-ILC : RACK1 ADT-CD24	CITE-CD44
CITE-CD10	3.63863e-25	0.413914	1	0.965	4.73021e-23	C17 - R-ILC : RACK1 ADT-CD24	CITE-CD10
CITE-CD342	2.09071e-23	1.32182	1	0.925	2.71793e-21	C17 - R-ILC : RACK1 ADT-CD24	CITE-CD34
CITE-PDL11	2.11534e-22	0.339942	0.965	0.79	2.74994e-20	C17 - R-ILC : RACK1 ADT-CD24	CITE-PDL1
CITE-CD1331	2.99894e-21	0.378097	1	0.998	3.89863e-19	C17 - R-ILC : RACK1 ADT-CD24	CITE-CD133
CITE-CXCR31	1.83982e-20	0.35652	1	0.983	2.39177e-18	C17 - R-ILC : RACK1 ADT-CD24	CITE-CXCR3
CITE-CD191	1.45784e-19	0.26473	1	0.884	1.89519e-17	C17 - R-ILC : RACK1 ADT-CD24	CITE-CD19
CITE-CD395	1.57583e-18	0.453356	1	0.994	2.04857e-16	C17 - R-ILC : RACK1 ADT-CD24	CITE-CD39
CITE-CD143	7.8495e-18	0.303677	1	0.937	1.02044e-15	C17 - R-ILC : RACK1 ADT-CD24	CITE-CD14
CITE-CD1C1	1.8437e-15	0.260906	1	0.976	2.39681e-13	C17 - R-ILC : RACK1 ADT-CD24	CITE-CD1C
CITE-EGFR	3.90517e-14	0.472242	0.965	0.811	5.07671e-12	C17 - R-ILC : RACK1 ADT-CD24	CITE-EGFR
CITE-TCRgd1	7.23533e-14	0.251127	1	0.999	9.40593e-12	C17 - R-ILC : RACK1 ADT-CD24	CITE-TCRgd
CITE-IgG.Fc1	3.89706e-11	0.311973	1	1	5.06617e-09	C17 - R-ILC : RACK1 ADT-CD24	CITE-IgG.Fc
CITE-CD49f3	8.46863e-09	0.258821	1	0.948	1.10092e-06	C17 - R-ILC : RACK1 ADT-CD24	CITE-CD49f
CITE-CD7	8.55223e-118	0.969679	0.957	0.328	1.11179e-115	C19 - CD4+ Th : RACK1 ADT-CD7	CITE-CD7
CITE-CD127	3.5974e-107	0.61587	0.802	0.363	4.67661e-105	C19 - CD4+ Th : RACK1 ADT-CD7	CITE-CD127
CITE-CD49	2.04358e-27	0.704214	1	0.924	2.65666e-25	C19 - CD4+ Th : RACK1 ADT-CD7	CITE-CD4
CITE-CD484	1.07874e-15	0.552019	1	0.999	1.40236e-13	C19 - CD4+ Th : RACK1 ADT-CD7	CITE-CD48
CITE-CD474	6.50855e-15	0.374827	1	1	8.46112e-13	C19 - CD4+ Th : RACK1 ADT-CD7	CITE-CD47
CITE-CD49f4	8.41025e-15	0.418611	1	0.948	1.09333e-12	C19 - CD4+ Th : RACK1 ADT-CD7	CITE-CD49f
CITE-CD56	3.65551e-14	0.778435	1	0.994	4.75216e-12	C19 - CD4+ Th : RACK1 ADT-CD7	CITE-CD5
CITE-CD36	2.38185e-08	0.332331	1	0.999	3.09641e-06	C19 - CD4+ Th : RACK1 ADT-CD7	CITE-CD3
CITE-CD29	4.74562e-08	0.463151	1	0.999	6.16931e-06	C19 - CD4+ Th : RACK1 ADT-CD7	CITE-CD2
CITE-TCRab4	1.79516e-07	0.303483	1	0.986	2.33371e-05	C19 - CD4+ Th : RACK1 ADT-CD7	CITE-TCRab
CITE-TCRVa7.21	0	2.63953	1	0.858	0	C21 - MAIT : HSP90AA1 ADT-TCRVa7.2	CITE-TCRVa7.2
CITE-CD8A5	7.168e-31	1.71706	1	0.989	9.3184e-29	C21 - MAIT : HSP90AA1 ADT-TCRVa7.2	CITE-CD8A
CITE-CD161	5.51945e-23	0.465917	0.683	0.766	7.17529e-21	C21 - MAIT : HSP90AA1 ADT-TCRVa7.2	CITE-CD161
CITE-2B46	2.55604e-15	0.801569	0.983	0.892	3.32285e-13	C21 - MAIT : HSP90AA1 ADT-TCRVa7.2	CITE-2B4
CITE-CD1036	1.48617e-11	1.32956	0.767	0.895	1.93202e-09	C21 - MAIT : HSP90AA1 ADT-TCRVa7.2	CITE-CD103
CITE-NKG2D5	5.0674e-11	0.616744	0.917	0.94	6.58763e-09	C21 - MAIT : HSP90AA1 ADT-TCRVa7.2	CITE-NKG2D
CITE-CD696	1.67211e-08	0.835265	0.983	0.997	2.17375e-06	C21 - MAIT : HSP90AA1 ADT-TCRVa7.2	CITE-CD69
CITE-CD485	2.66411e-08	0.611013	1	0.999	3.46334e-06	C21 - MAIT : HSP90AA1 ADT-TCRVa7.2	CITE-CD48
CITE-CCR51	4.74451e-08	0.538109	1	0.986	6.16786e-06	C21 - MAIT : HSP90AA1 ADT-TCRVa7.2	CITE-CCR5
CITE-CD49a6	4.91536e-06	0.875207	0.95	0.974	0.000638997	C21 - MAIT : HSP90AA1 ADT-TCRVa7.2	CITE-CD49a
CITE-CD210	0.00149476	0.3817	1	0.999	0.194319	C21 - MAIT : HSP90AA1 ADT-TCRVa7.2	CITE-CD2

## Sheet: All_TIL_RNA_markers
	p_val	avg_log2FC	pct.1	pct.2	p_val_adj	cluster	gene
NKG7	2.97706e-129	-2.73468	0.056	0.41	1.3453e-124	C01 - CD4+ Th : TPT1 ADT-CD49fmid	NKG7
TPT1	4.73149e-106	0.555926	0.994	0.992	2.13811e-101	C01 - CD4+ Th : TPT1 ADT-CD49fmid	TPT1
CCL4	1.19355e-82	-2.15582	0.12	0.437	5.39352e-78	C01 - CD4+ Th : TPT1 ADT-CD49fmid	CCL4
RPL11	2.341e-82	0.500513	0.994	0.982	1.05788e-77	C01 - CD4+ Th : TPT1 ADT-CD49fmid	RPL11
RPS18	2.42613e-79	0.522065	0.992	0.987	1.09634e-74	C01 - CD4+ Th : TPT1 ADT-CD49fmid	RPS18
RPS16	2.12396e-73	0.482675	0.981	0.972	9.59794e-69	C01 - CD4+ Th : TPT1 ADT-CD49fmid	RPS16
RPL34	3.80708e-73	0.466738	0.987	0.979	1.72038e-68	C01 - CD4+ Th : TPT1 ADT-CD49fmid	RPL34
KLRD1	7.46392e-73	-1.45751	0.015	0.237	3.37287e-68	C01 - CD4+ Th : TPT1 ADT-CD49fmid	KLRD1
RPS27A	3.55758e-72	0.443103	0.992	0.984	1.60764e-67	C01 - CD4+ Th : TPT1 ADT-CD49fmid	RPS27A
RPL13	9.01596e-72	0.451256	0.996	0.993	4.07422e-67	C01 - CD4+ Th : TPT1 ADT-CD49fmid	RPL13
RPL32	1.16306e-69	0.469449	0.992	0.982	5.25573e-65	C01 - CD4+ Th : TPT1 ADT-CD49fmid	RPL32
CD8A	2.04492e-69	-1.37251	0.033	0.264	9.2408e-65	C01 - CD4+ Th : TPT1 ADT-CD49fmid	CD8A
RPS12	8.45637e-67	0.460153	0.996	0.989	3.82135e-62	C01 - CD4+ Th : TPT1 ADT-CD49fmid	RPS12
RPL30	6.2483e-65	0.42702	0.995	0.984	2.82355e-60	C01 - CD4+ Th : TPT1 ADT-CD49fmid	RPL30
ANXA1	9.09868e-65	0.669815	0.877	0.648	4.1116e-60	C01 - CD4+ Th : TPT1 ADT-CD49fmid	ANXA1
RPS8	1.18185e-64	0.48872	0.989	0.971	5.34068e-60	C01 - CD4+ Th : TPT1 ADT-CD49fmid	RPS8
RPS6	1.21296e-64	0.497879	0.989	0.973	5.48124e-60	C01 - CD4+ Th : TPT1 ADT-CD49fmid	RPS6
CCL5	2.45262e-64	-1.42565	0.422	0.64	1.10831e-59	C01 - CD4+ Th : TPT1 ADT-CD49fmid	CCL5
RPS3A	7.11531e-64	0.470127	0.993	0.977	3.21534e-59	C01 - CD4+ Th : TPT1 ADT-CD49fmid	RPS3A
RPL19	5.31483e-60	0.407154	0.993	0.981	2.40172e-55	C01 - CD4+ Th : TPT1 ADT-CD49fmid	RPL19
RPL12	2.97559e-59	0.430781	0.991	0.97	1.34464e-54	C01 - CD4+ Th : TPT1 ADT-CD49fmid	RPL12
RPLP2	6.71491e-59	0.41788	0.988	0.976	3.0344e-54	C01 - CD4+ Th : TPT1 ADT-CD49fmid	RPLP2
CD40LG	4.13025e-58	0.963277	0.414	0.165	1.86642e-53	C01 - CD4+ Th : TPT1 ADT-CD49fmid	CD40LG
RPLP1	1.18044e-57	0.404865	0.996	0.992	5.3343e-53	C01 - CD4+ Th : TPT1 ADT-CD49fmid	RPLP1
RPS4X	1.56943e-57	0.421089	0.987	0.978	7.09208e-53	C01 - CD4+ Th : TPT1 ADT-CD49fmid	RPS4X
RPL18A	3.34963e-57	0.418188	0.988	0.978	1.51366e-52	C01 - CD4+ Th : TPT1 ADT-CD49fmid	RPL18A
RPS23	3.05342e-56	0.388754	0.989	0.98	1.37981e-51	C01 - CD4+ Th : TPT1 ADT-CD49fmid	RPS23
RPL9	1.01384e-54	0.424535	0.989	0.973	4.58144e-50	C01 - CD4+ Th : TPT1 ADT-CD49fmid	RPL9
RPS13	1.95678e-53	0.429676	0.987	0.957	8.84248e-49	C01 - CD4+ Th : TPT1 ADT-CD49fmid	RPS13
RPL39	5.15499e-53	0.388631	0.993	0.977	2.32949e-48	C01 - CD4+ Th : TPT1 ADT-CD49fmid	RPL39
CD8B	8.03402e-53	-0.966967	0.03	0.22	3.63049e-48	C01 - CD4+ Th : TPT1 ADT-CD49fmid	CD8B
IL7R	7.58676e-52	0.645245	0.879	0.66	3.42838e-47	C01 - CD4+ Th : TPT1 ADT-CD49fmid	IL7R
RPS14	7.55951e-51	0.382001	0.991	0.977	3.41607e-46	C01 - CD4+ Th : TPT1 ADT-CD49fmid	RPS14
RPL3	2.06082e-50	0.395412	0.987	0.975	9.31263e-46	C01 - CD4+ Th : TPT1 ADT-CD49fmid	RPL3
TNFRSF9	4.34122e-50	-0.900295	0.025	0.205	1.96175e-45	C01 - CD4+ Th : TPT1 ADT-CD49fmid	TNFRSF9
RPL7	7.49749e-50	0.51875	0.95	0.878	3.38804e-45	C01 - CD4+ Th : TPT1 ADT-CD49fmid	RPL7
TIGIT	2.11626e-49	-1.03566	0.135	0.366	9.56315e-45	C01 - CD4+ Th : TPT1 ADT-CD49fmid	TIGIT
RPL18	2.08788e-48	0.374019	0.992	0.967	9.43491e-44	C01 - CD4+ Th : TPT1 ADT-CD49fmid	RPL18
RPL10	4.40155e-48	0.368812	0.994	0.989	1.98902e-43	C01 - CD4+ Th : TPT1 ADT-CD49fmid	RPL10
FTH1	6.73583e-48	0.58827	0.991	0.969	3.04386e-43	C01 - CD4+ Th : TPT1 ADT-CD49fmid	FTH1
RPS2	1.18015e-47	0.357353	0.989	0.987	5.333e-43	C01 - CD4+ Th : TPT1 ADT-CD49fmid	RPS2
RPL13A	1.18241e-47	0.429005	0.982	0.968	5.34319e-43	C01 - CD4+ Th : TPT1 ADT-CD49fmid	RPL13A
RPL22	1.59554e-47	0.450544	0.96	0.923	7.21006e-43	C01 - CD4+ Th : TPT1 ADT-CD49fmid	RPL22
EEF1A1	8.92416e-47	0.436136	0.999	0.991	4.03274e-42	C01 - CD4+ Th : TPT1 ADT-CD49fmid	EEF1A1
RPL14	3.18249e-46	0.351076	0.982	0.968	1.43814e-41	C01 - CD4+ Th : TPT1 ADT-CD49fmid	RPL14
RPS7	4.32941e-46	0.343409	0.986	0.971	1.95642e-41	C01 - CD4+ Th : TPT1 ADT-CD49fmid	RPS7
CRTAM	4.29327e-45	-0.92757	0.012	0.161	1.94008e-40	C01 - CD4+ Th : TPT1 ADT-CD49fmid	CRTAM
CST7	7.69304e-45	-0.894251	0.314	0.532	3.47641e-40	C01 - CD4+ Th : TPT1 ADT-CD49fmid	CST7
RPL36	9.84922e-45	0.374802	0.958	0.951	4.45076e-40	C01 - CD4+ Th : TPT1 ADT-CD49fmid	RPL36
RPL29	1.84932e-44	0.382501	0.979	0.964	8.35688e-40	C01 - CD4+ Th : TPT1 ADT-CD49fmid	RPL29
GZMB	4.34504e-44	-1.40748	0.018	0.167	1.96348e-39	C01 - CD4+ Th : TPT1 ADT-CD49fmid	GZMB
RPS25	8.52717e-44	0.336975	0.986	0.974	3.85334e-39	C01 - CD4+ Th : TPT1 ADT-CD49fmid	RPS25
CD52	1.80936e-43	0.520154	0.936	0.849	8.17633e-39	C01 - CD4+ Th : TPT1 ADT-CD49fmid	CD52
RPL4	2.41677e-43	0.452493	0.938	0.883	1.09212e-38	C01 - CD4+ Th : TPT1 ADT-CD49fmid	RPL4
RPS20	3.77839e-43	0.48934	0.95	0.88	1.70742e-38	C01 - CD4+ Th : TPT1 ADT-CD49fmid	RPS20
CCL4L2	6.58256e-43	-2.66263	0.043	0.211	2.9746e-38	C01 - CD4+ Th : TPT1 ADT-CD49fmid	CCL4L2
RPL21	1.53305e-42	0.386506	0.983	0.968	6.9277e-38	C01 - CD4+ Th : TPT1 ADT-CD49fmid	RPL21
XCL2	2.16829e-42	-1.63809	0.043	0.213	9.79831e-38	C01 - CD4+ Th : TPT1 ADT-CD49fmid	XCL2
RPL23	2.04633e-41	0.444405	0.896	0.86	9.24718e-37	C01 - CD4+ Th : TPT1 ADT-CD49fmid	RPL23
RPL26	2.91343e-41	0.335671	0.987	0.974	1.31655e-36	C01 - CD4+ Th : TPT1 ADT-CD49fmid	RPL26
RPL35A	2.16017e-40	0.33423	0.981	0.966	9.7616e-36	C01 - CD4+ Th : TPT1 ADT-CD49fmid	RPL35A
CD7	8.11744e-40	-0.889996	0.446	0.604	3.66819e-35	C01 - CD4+ Th : TPT1 ADT-CD49fmid	CD7
GNLY	5.79905e-39	-2.48147	0.047	0.2	2.62053e-34	C01 - CD4+ Th : TPT1 ADT-CD49fmid	GNLY
HLA-DQA1	1.06783e-38	-0.9426	0.107	0.296	4.82541e-34	C01 - CD4+ Th : TPT1 ADT-CD49fmid	HLA-DQA1
RPL38	2.30109e-38	0.388593	0.949	0.932	1.03984e-33	C01 - CD4+ Th : TPT1 ADT-CD49fmid	RPL38
RPS19	5.23323e-38	0.312973	0.989	0.986	2.36484e-33	C01 - CD4+ Th : TPT1 ADT-CD49fmid	RPS19
RPS29	6.79475e-38	0.325093	0.975	0.971	3.07048e-33	C01 - CD4+ Th : TPT1 ADT-CD49fmid	RPS29
RPL37	1.03073e-37	0.324201	0.979	0.973	4.65777e-33	C01 - CD4+ Th : TPT1 ADT-CD49fmid	RPL37
RPS15A	2.28459e-37	0.28542	0.989	0.981	1.03238e-32	C01 - CD4+ Th : TPT1 ADT-CD49fmid	RPS15A
RPL27	5.52381e-37	0.362353	0.968	0.93	2.49616e-32	C01 - CD4+ Th : TPT1 ADT-CD49fmid	RPL27
RPL5	5.64884e-37	0.394382	0.973	0.942	2.55266e-32	C01 - CD4+ Th : TPT1 ADT-CD49fmid	RPL5
NACA	8.33197e-37	0.352866	0.966	0.94	3.76514e-32	C01 - CD4+ Th : TPT1 ADT-CD49fmid	NACA
APOBEC3G	1.99304e-36	-0.754067	0.286	0.486	9.00635e-32	C01 - CD4+ Th : TPT1 ADT-CD49fmid	APOBEC3G
RPL35	3.49119e-36	0.331144	0.967	0.956	1.57764e-31	C01 - CD4+ Th : TPT1 ADT-CD49fmid	RPL35
RPS15	5.62402e-36	0.291814	0.985	0.978	2.54144e-31	C01 - CD4+ Th : TPT1 ADT-CD49fmid	RPS15
PRF1	6.39715e-36	-0.680694	0.039	0.19	2.89081e-31	C01 - CD4+ Th : TPT1 ADT-CD49fmid	PRF1
TNFRSF18	7.82355e-36	-1.15285	0.176	0.311	3.53539e-31	C01 - CD4+ Th : TPT1 ADT-CD49fmid	TNFRSF18
RPL6	1.15888e-35	0.343368	0.981	0.964	5.23686e-31	C01 - CD4+ Th : TPT1 ADT-CD49fmid	RPL6
ITM2C	1.54616e-35	-0.742479	0.078	0.244	6.98694e-31	C01 - CD4+ Th : TPT1 ADT-CD49fmid	ITM2C
RPL23A	1.7252e-35	0.303295	0.985	0.975	7.79599e-31	C01 - CD4+ Th : TPT1 ADT-CD49fmid	RPL23A
RPS11	3.19995e-35	0.373887	0.967	0.944	1.44603e-30	C01 - CD4+ Th : TPT1 ADT-CD49fmid	RPS11
UBA52	4.77942e-35	0.347224	0.97	0.946	2.15977e-30	C01 - CD4+ Th : TPT1 ADT-CD49fmid	UBA52
RPL27A	8.66359e-35	0.357896	0.979	0.955	3.91499e-30	C01 - CD4+ Th : TPT1 ADT-CD49fmid	RPL27A
CTSW	9.62592e-35	-0.953264	0.121	0.269	4.34986e-30	C01 - CD4+ Th : TPT1 ADT-CD49fmid	CTSW
TRDC	2.51723e-34	-1.08699	0.008	0.119	1.13751e-29	C01 - CD4+ Th : TPT1 ADT-CD49fmid	TRDC
RACK1	1.08183e-33	0.699348	0.555	0.399	4.88867e-29	C01 - CD4+ Th : TPT1 ADT-CD49fmid	RACK1
RPS5	3.88434e-33	0.32233	0.953	0.939	1.7553e-28	C01 - CD4+ Th : TPT1 ADT-CD49fmid	RPS5
GPR183	5.41057e-33	0.57972	0.584	0.366	2.44498e-28	C01 - CD4+ Th : TPT1 ADT-CD49fmid	GPR183
S100A10	7.37588e-33	0.488653	0.871	0.766	3.33309e-28	C01 - CD4+ Th : TPT1 ADT-CD49fmid	S100A10
RPL24	1.00277e-32	0.297047	0.981	0.962	4.53141e-28	C01 - CD4+ Th : TPT1 ADT-CD49fmid	RPL24
HSPA1A	5.05865e-32	-0.771461	0.594	0.757	2.28595e-27	C01 - CD4+ Th : TPT1 ADT-CD49fmid	HSPA1A
RPL10A	1.06414e-31	0.327158	0.979	0.952	4.80873e-27	C01 - CD4+ Th : TPT1 ADT-CD49fmid	RPL10A
RPLP0	1.22907e-31	0.393887	0.944	0.895	5.55407e-27	C01 - CD4+ Th : TPT1 ADT-CD49fmid	RPLP0
KLRC1	2.05968e-31	-0.948424	0.006	0.108	9.30751e-27	C01 - CD4+ Th : TPT1 ADT-CD49fmid	KLRC1
RPS3	2.25264e-31	0.297341	0.989	0.976	1.01795e-26	C01 - CD4+ Th : TPT1 ADT-CD49fmid	RPS3
LTB	2.65075e-31	0.426679	0.824	0.642	1.19785e-26	C01 - CD4+ Th : TPT1 ADT-CD49fmid	LTB
HLA-DRB1	3.43939e-31	-0.805905	0.359	0.551	1.55423e-26	C01 - CD4+ Th : TPT1 ADT-CD49fmid	HLA-DRB1
RPS21	6.66677e-31	0.321299	0.979	0.955	3.01265e-26	C01 - CD4+ Th : TPT1 ADT-CD49fmid	RPS21
HSPA1B	1.74487e-30	-0.817573	0.587	0.738	7.88491e-26	C01 - CD4+ Th : TPT1 ADT-CD49fmid	HSPA1B
RPL37A	2.05237e-30	0.311755	0.973	0.959	9.27445e-26	C01 - CD4+ Th : TPT1 ADT-CD49fmid	RPL37A
LAG3	3.19769e-30	-0.656939	0.056	0.195	1.44501e-25	C01 - CD4+ Th : TPT1 ADT-CD49fmid	LAG3
FOXP3	3.63527e-30	-0.502666	0.011	0.11	1.64274e-25	C01 - CD4+ Th : TPT1 ADT-CD49fmid	FOXP3
CD74	7.25085e-30	-0.672782	0.611	0.721	3.27659e-25	C01 - CD4+ Th : TPT1 ADT-CD49fmid	CD74
RPS27	8.44854e-30	0.27454	0.993	0.991	3.81781e-25	C01 - CD4+ Th : TPT1 ADT-CD49fmid	RPS27
LDHB	1.44423e-29	0.494169	0.738	0.584	6.52635e-25	C01 - CD4+ Th : TPT1 ADT-CD49fmid	LDHB
METRNL	2.62621e-29	-0.793639	0.234	0.404	1.18676e-24	C01 - CD4+ Th : TPT1 ADT-CD49fmid	METRNL
HSPE1	5.17937e-29	-0.588945	0.706	0.772	2.34051e-24	C01 - CD4+ Th : TPT1 ADT-CD49fmid	HSPE1
EEF1B2	6.35291e-29	0.392273	0.925	0.89	2.87081e-24	C01 - CD4+ Th : TPT1 ADT-CD49fmid	EEF1B2
HLA-DPB1	7.09038e-29	-0.639937	0.399	0.563	3.20407e-24	C01 - CD4+ Th : TPT1 ADT-CD49fmid	HLA-DPB1
XCL1	1.80881e-28	-1.32608	0.044	0.173	8.17384e-24	C01 - CD4+ Th : TPT1 ADT-CD49fmid	XCL1
RPL41	2.44393e-28	0.285227	0.991	0.989	1.10439e-23	C01 - CD4+ Th : TPT1 ADT-CD49fmid	RPL41
NOP53	2.82817e-28	0.588057	0.497	0.318	1.27802e-23	C01 - CD4+ Th : TPT1 ADT-CD49fmid	NOP53
CCL3	6.28981e-28	-1.94147	0.034	0.145	2.8423e-23	C01 - CD4+ Th : TPT1 ADT-CD49fmid	CCL3
RPS9	6.32208e-28	0.286241	0.974	0.968	2.85688e-23	C01 - CD4+ Th : TPT1 ADT-CD49fmid	RPS9
SARAF	7.21856e-28	0.389004	0.942	0.867	3.262e-23	C01 - CD4+ Th : TPT1 ADT-CD49fmid	SARAF
RPS28	1.13619e-27	0.259528	0.98	0.975	5.13432e-23	C01 - CD4+ Th : TPT1 ADT-CD49fmid	RPS28
HLA-DPA1	2.86095e-27	-0.644087	0.389	0.558	1.29284e-22	C01 - CD4+ Th : TPT1 ADT-CD49fmid	HLA-DPA1
CD27	3.51264e-27	-0.693023	0.242	0.378	1.58733e-22	C01 - CD4+ Th : TPT1 ADT-CD49fmid	CD27
PTMS	4.67686e-27	-0.607313	0.101	0.253	2.11343e-22	C01 - CD4+ Th : TPT1 ADT-CD49fmid	PTMS
RPSA	6.55726e-27	0.338793	0.974	0.949	2.96316e-22	C01 - CD4+ Th : TPT1 ADT-CD49fmid	RPSA
HSP90AA1	1.47421e-26	-0.643448	0.977	0.978	6.66183e-22	C01 - CD4+ Th : TPT1 ADT-CD49fmid	HSP90AA1
IKZF2	1.91769e-26	-0.461297	0.032	0.15	8.66585e-22	C01 - CD4+ Th : TPT1 ADT-CD49fmid	IKZF2
PTGER4	2.56895e-26	0.430036	0.605	0.409	1.16088e-21	C01 - CD4+ Th : TPT1 ADT-CD49fmid	PTGER4
MATK	6.50147e-26	-0.528794	0.063	0.19	2.93795e-21	C01 - CD4+ Th : TPT1 ADT-CD49fmid	MATK
PFDN5	1.93945e-25	0.304016	0.931	0.894	8.76416e-21	C01 - CD4+ Th : TPT1 ADT-CD49fmid	PFDN5
TMSB4X	4.60778e-25	0.271477	0.999	0.994	2.08221e-20	C01 - CD4+ Th : TPT1 ADT-CD49fmid	TMSB4X
RPL8	4.79915e-25	0.260268	0.975	0.964	2.16869e-20	C01 - CD4+ Th : TPT1 ADT-CD49fmid	RPL8
PMAIP1	6.62662e-25	-0.77376	0.343	0.473	2.9945e-20	C01 - CD4+ Th : TPT1 ADT-CD49fmid	PMAIP1
RPL7A	7.70785e-25	0.252883	0.985	0.972	3.4831e-20	C01 - CD4+ Th : TPT1 ADT-CD49fmid	RPL7A
HNRNPA2B1	1.33337e-24	-0.35522	0.864	0.896	6.02537e-20	C01 - CD4+ Th : TPT1 ADT-CD49fmid	HNRNPA2B1
HLA-DRA	1.36756e-24	-0.77806	0.273	0.436	6.17985e-20	C01 - CD4+ Th : TPT1 ADT-CD49fmid	HLA-DRA
RNASET2	2.03492e-24	0.437194	0.526	0.356	9.1956e-20	C01 - CD4+ Th : TPT1 ADT-CD49fmid	RNASET2
DUSP2	3.08369e-24	-0.578498	0.749	0.798	1.39349e-19	C01 - CD4+ Th : TPT1 ADT-CD49fmid	DUSP2
CCL3L3	6.38677e-24	-0.735034	0.026	0.122	2.88612e-19	C01 - CD4+ Th : TPT1 ADT-CD49fmid	CCL3L3
UBB	8.66789e-24	-0.40391	0.94	0.94	3.91693e-19	C01 - CD4+ Th : TPT1 ADT-CD49fmid	UBB
HLA-DMA	9.94103e-24	-0.486721	0.108	0.251	4.49225e-19	C01 - CD4+ Th : TPT1 ADT-CD49fmid	HLA-DMA
HLA-A	1.37812e-23	-0.345375	0.982	0.989	6.22759e-19	C01 - CD4+ Th : TPT1 ADT-CD49fmid	HLA-A
GZMK	2.04481e-23	-0.808999	0.253	0.404	9.24028e-19	C01 - CD4+ Th : TPT1 ADT-CD49fmid	GZMK
DNAJB1	2.595e-23	-0.653884	0.827	0.857	1.17266e-18	C01 - CD4+ Th : TPT1 ADT-CD49fmid	DNAJB1
LYST	2.63566e-23	-0.57422	0.195	0.335	1.19103e-18	C01 - CD4+ Th : TPT1 ADT-CD49fmid	LYST
GZMH	2.68106e-23	-0.820821	0.059	0.175	1.21154e-18	C01 - CD4+ Th : TPT1 ADT-CD49fmid	GZMH
TYROBP	4.56842e-23	-0.838992	0.033	0.125	2.06442e-18	C01 - CD4+ Th : TPT1 ADT-CD49fmid	TYROBP
HSPD1	4.9914e-23	-0.650298	0.631	0.678	2.25556e-18	C01 - CD4+ Th : TPT1 ADT-CD49fmid	HSPD1
ZNF683	5.21118e-23	-0.564123	0.04	0.15	2.35488e-18	C01 - CD4+ Th : TPT1 ADT-CD49fmid	ZNF683
RPL31	8.95161e-23	0.351007	0.877	0.787	4.04514e-18	C01 - CD4+ Th : TPT1 ADT-CD49fmid	RPL31
TRGC2	1.33839e-22	-0.693201	0.091	0.217	6.04804e-18	C01 - CD4+ Th : TPT1 ADT-CD49fmid	TRGC2
AC016831.5	2.42772e-22	0.33883	0.348	0.194	1.09706e-17	C01 - CD4+ Th : TPT1 ADT-CD49fmid	AC016831.5
ARL4C	4.17661e-22	0.439172	0.758	0.615	1.88737e-17	C01 - CD4+ Th : TPT1 ADT-CD49fmid	ARL4C
GEM	1.02012e-21	-0.745317	0.056	0.167	4.60982e-17	C01 - CD4+ Th : TPT1 ADT-CD49fmid	GEM
FXYD5	1.05068e-21	0.341566	0.814	0.683	4.7479e-17	C01 - CD4+ Th : TPT1 ADT-CD49fmid	FXYD5
ATP5MC2	1.45767e-21	0.309908	0.498	0.333	6.58707e-17	C01 - CD4+ Th : TPT1 ADT-CD49fmid	ATP5MC2
CCR6	2.1791e-21	0.534776	0.234	0.11	9.84714e-17	C01 - CD4+ Th : TPT1 ADT-CD49fmid	CCR6
HSP90AB1	9.01668e-21	-0.505085	0.912	0.916	4.07455e-16	C01 - CD4+ Th : TPT1 ADT-CD49fmid	HSP90AB1
ID3	1.0329e-20	-0.715218	0.127	0.261	4.66756e-16	C01 - CD4+ Th : TPT1 ADT-CD49fmid	ID3
TPI1	1.47567e-20	-0.367753	0.601	0.648	6.66839e-16	C01 - CD4+ Th : TPT1 ADT-CD49fmid	TPI1
ATP5F1E	1.59407e-20	0.319007	0.558	0.39	7.20343e-16	C01 - CD4+ Th : TPT1 ADT-CD49fmid	ATP5F1E
FAM173A	2.67313e-20	-0.376451	0.076	0.198	1.20796e-15	C01 - CD4+ Th : TPT1 ADT-CD49fmid	FAM173A
IFNG	3.11093e-20	-1.18707	0.187	0.333	1.4058e-15	C01 - CD4+ Th : TPT1 ADT-CD49fmid	IFNG
S100A4	4.44127e-20	0.352203	0.93	0.862	2.00696e-15	C01 - CD4+ Th : TPT1 ADT-CD49fmid	S100A4
LINC00152	4.47601e-20	-0.584404	0.121	0.257	2.02266e-15	C01 - CD4+ Th : TPT1 ADT-CD49fmid	LINC00152
CCR7	4.86488e-20	0.46442	0.41	0.252	2.19839e-15	C01 - CD4+ Th : TPT1 ADT-CD49fmid	CCR7
CD63	6.10134e-20	-0.524287	0.427	0.516	2.75714e-15	C01 - CD4+ Th : TPT1 ADT-CD49fmid	CD63
CD6	8.37698e-20	0.379172	0.526	0.361	3.78547e-15	C01 - CD4+ Th : TPT1 ADT-CD49fmid	CD6
HSPH1	8.64596e-20	-0.665412	0.622	0.699	3.90703e-15	C01 - CD4+ Th : TPT1 ADT-CD49fmid	HSPH1
AOAH	1.17827e-19	-0.323508	0.024	0.113	5.3245e-15	C01 - CD4+ Th : TPT1 ADT-CD49fmid	AOAH
IL2RB	1.3462e-19	-0.502818	0.171	0.302	6.08333e-15	C01 - CD4+ Th : TPT1 ADT-CD49fmid	IL2RB
ATP5MG	1.81911e-19	0.290585	0.51	0.354	8.22039e-15	C01 - CD4+ Th : TPT1 ADT-CD49fmid	ATP5MG
TIMP1	6.10127e-19	0.36977	0.389	0.239	2.7571e-14	C01 - CD4+ Th : TPT1 ADT-CD49fmid	TIMP1
PABPC1	6.21696e-19	0.328473	0.896	0.835	2.80938e-14	C01 - CD4+ Th : TPT1 ADT-CD49fmid	PABPC1
SRGAP3	1.8827e-18	-0.37293	0.026	0.11	8.50774e-14	C01 - CD4+ Th : TPT1 ADT-CD49fmid	SRGAP3
CTSH	2.60644e-18	0.358551	0.159	0.067	1.17782e-13	C01 - CD4+ Th : TPT1 ADT-CD49fmid	CTSH
REL	3.65747e-18	-0.43276	0.718	0.719	1.65277e-13	C01 - CD4+ Th : TPT1 ADT-CD49fmid	REL
TOMM7	7.55819e-18	0.268259	0.899	0.853	3.41547e-13	C01 - CD4+ Th : TPT1 ADT-CD49fmid	TOMM7
SELENOK	9.87764e-18	0.445632	0.472	0.317	4.46361e-13	C01 - CD4+ Th : TPT1 ADT-CD49fmid	SELENOK
TRAT1	1.1622e-17	0.323093	0.414	0.265	5.25186e-13	C01 - CD4+ Th : TPT1 ADT-CD49fmid	TRAT1
TNFAIP3	1.71659e-17	0.334062	0.917	0.849	7.7571e-13	C01 - CD4+ Th : TPT1 ADT-CD49fmid	TNFAIP3
CTSC	1.83218e-17	-0.524388	0.361	0.471	8.27945e-13	C01 - CD4+ Th : TPT1 ADT-CD49fmid	CTSC
ZEB2	1.85122e-17	-0.598381	0.16	0.293	8.36546e-13	C01 - CD4+ Th : TPT1 ADT-CD49fmid	ZEB2
MAGEH1	1.86992e-17	-0.481641	0.028	0.106	8.45e-13	C01 - CD4+ Th : TPT1 ADT-CD49fmid	MAGEH1
MGAT4A	2.33622e-17	0.314143	0.364	0.224	1.05572e-12	C01 - CD4+ Th : TPT1 ADT-CD49fmid	MGAT4A
PPP1CB	2.65471e-17	0.381292	0.637	0.505	1.19964e-12	C01 - CD4+ Th : TPT1 ADT-CD49fmid	PPP1CB
YBX3	3.96021e-17	-0.494444	0.044	0.136	1.78958e-12	C01 - CD4+ Th : TPT1 ADT-CD49fmid	YBX3
FASLG	4.41008e-17	-0.448873	0.033	0.117	1.99287e-12	C01 - CD4+ Th : TPT1 ADT-CD49fmid	FASLG
AC058791.1	4.63473e-17	0.392279	0.556	0.41	2.09439e-12	C01 - CD4+ Th : TPT1 ADT-CD49fmid	AC058791.1
ANKRD28	5.21157e-17	0.425958	0.407	0.262	2.35505e-12	C01 - CD4+ Th : TPT1 ADT-CD49fmid	ANKRD28
AQP3	6.16736e-17	0.429135	0.358	0.228	2.78697e-12	C01 - CD4+ Th : TPT1 ADT-CD49fmid	AQP3
DUSP4	7.2544e-17	-0.644419	0.521	0.588	3.27819e-12	C01 - CD4+ Th : TPT1 ADT-CD49fmid	DUSP4
RHOB	1.121e-16	-0.489479	0.129	0.251	5.06569e-12	C01 - CD4+ Th : TPT1 ADT-CD49fmid	RHOB
PASK	2.07757e-16	0.337925	0.2	0.097	9.38834e-12	C01 - CD4+ Th : TPT1 ADT-CD49fmid	PASK
NCR3	2.27453e-16	-0.298951	0.03	0.111	1.02784e-11	C01 - CD4+ Th : TPT1 ADT-CD49fmid	NCR3
CHORDC1	4.67781e-16	-0.500925	0.33	0.454	2.11385e-11	C01 - CD4+ Th : TPT1 ADT-CD49fmid	CHORDC1
FYB1	5.62159e-16	0.338	0.435	0.29	2.54034e-11	C01 - CD4+ Th : TPT1 ADT-CD49fmid	FYB1
SAMD3	6.38891e-16	-0.42249	0.135	0.247	2.88709e-11	C01 - CD4+ Th : TPT1 ADT-CD49fmid	SAMD3
EIF3E	6.59893e-16	0.34723	0.749	0.639	2.98199e-11	C01 - CD4+ Th : TPT1 ADT-CD49fmid	EIF3E
LEPROTL1	7.00932e-16	0.316032	0.739	0.609	3.16744e-11	C01 - CD4+ Th : TPT1 ADT-CD49fmid	LEPROTL1
LAIR2	7.86642e-16	-0.388834	0.03	0.108	3.55476e-11	C01 - CD4+ Th : TPT1 ADT-CD49fmid	LAIR2
TNFSF9	8.61061e-16	-0.725551	0.122	0.229	3.89105e-11	C01 - CD4+ Th : TPT1 ADT-CD49fmid	TNFSF9
IL2RA	1.01371e-15	-0.626118	0.055	0.128	4.58084e-11	C01 - CD4+ Th : TPT1 ADT-CD49fmid	IL2RA
SLC2A3	1.04786e-15	0.329984	0.724	0.596	4.73519e-11	C01 - CD4+ Th : TPT1 ADT-CD49fmid	SLC2A3
CMC1	1.58335e-15	-0.584886	0.144	0.249	7.15502e-11	C01 - CD4+ Th : TPT1 ADT-CD49fmid	CMC1
RORA	1.69287e-15	0.318855	0.655	0.508	7.64991e-11	C01 - CD4+ Th : TPT1 ADT-CD49fmid	RORA
RPL36AL	1.92349e-15	0.259484	0.91	0.865	8.69205e-11	C01 - CD4+ Th : TPT1 ADT-CD49fmid	RPL36AL
SERPINH1	2.06759e-15	-0.366538	0.04	0.125	9.34323e-11	C01 - CD4+ Th : TPT1 ADT-CD49fmid	SERPINH1
CTSL	3.10706e-15	0.333111	0.172	0.079	1.40405e-10	C01 - CD4+ Th : TPT1 ADT-CD49fmid	CTSL
SLC7A5	3.59454e-15	-0.444048	0.174	0.291	1.62434e-10	C01 - CD4+ Th : TPT1 ADT-CD49fmid	SLC7A5
S100A11	5.86317e-15	0.371241	0.775	0.684	2.64951e-10	C01 - CD4+ Th : TPT1 ADT-CD49fmid	S100A11
CD48	8.99143e-15	0.300145	0.817	0.72	4.06314e-10	C01 - CD4+ Th : TPT1 ADT-CD49fmid	CD48
GADD45A	1.09688e-14	-0.647646	0.295	0.405	4.9567e-10	C01 - CD4+ Th : TPT1 ADT-CD49fmid	GADD45A
HSPA8	1.18608e-14	-0.337289	0.943	0.926	5.35978e-10	C01 - CD4+ Th : TPT1 ADT-CD49fmid	HSPA8
BATF	1.32999e-14	-0.60371	0.32	0.352	6.0101e-10	C01 - CD4+ Th : TPT1 ADT-CD49fmid	BATF
VAV3	1.54046e-14	-0.286307	0.036	0.113	6.96117e-10	C01 - CD4+ Th : TPT1 ADT-CD49fmid	VAV3
LMNA	1.69136e-14	0.365139	0.732	0.627	7.64308e-10	C01 - CD4+ Th : TPT1 ADT-CD49fmid	LMNA
FLT3LG	2.07744e-14	0.304183	0.272	0.16	9.38776e-10	C01 - CD4+ Th : TPT1 ADT-CD49fmid	FLT3LG
TNFRSF4	2.33575e-14	-0.843095	0.2	0.243	1.0555e-09	C01 - CD4+ Th : TPT1 ADT-CD49fmid	TNFRSF4
CARD16	2.47721e-14	-0.462608	0.274	0.353	1.11943e-09	C01 - CD4+ Th : TPT1 ADT-CD49fmid	CARD16
AP3M2	2.50454e-14	0.331239	0.318	0.196	1.13178e-09	C01 - CD4+ Th : TPT1 ADT-CD49fmid	AP3M2
GABARAPL1	3.14122e-14	-0.435578	0.233	0.355	1.41949e-09	C01 - CD4+ Th : TPT1 ADT-CD49fmid	GABARAPL1
DNAJA1	3.87305e-14	-0.357983	0.922	0.896	1.75019e-09	C01 - CD4+ Th : TPT1 ADT-CD49fmid	DNAJA1
GSTP1	5.91535e-14	-0.512246	0.281	0.379	2.67309e-09	C01 - CD4+ Th : TPT1 ADT-CD49fmid	GSTP1
NSD3	8.37258e-14	0.289717	0.351	0.228	3.78349e-09	C01 - CD4+ Th : TPT1 ADT-CD49fmid	NSD3
ZBTB38	9.73621e-14	-0.395942	0.132	0.232	4.39969e-09	C01 - CD4+ Th : TPT1 ADT-CD49fmid	ZBTB38
BICDL1	1.05508e-13	0.327629	0.302	0.185	4.76782e-09	C01 - CD4+ Th : TPT1 ADT-CD49fmid	BICDL1
ITGA1	1.08617e-13	-0.355948	0.047	0.127	4.90829e-09	C01 - CD4+ Th : TPT1 ADT-CD49fmid	ITGA1
SMDT1	1.13941e-13	0.335529	0.527	0.418	5.14886e-09	C01 - CD4+ Th : TPT1 ADT-CD49fmid	SMDT1
IER5L	1.27606e-13	-0.509146	0.26	0.377	5.7664e-09	C01 - CD4+ Th : TPT1 ADT-CD49fmid	IER5L
RUNX3	1.53156e-13	-0.406152	0.45	0.535	6.92098e-09	C01 - CD4+ Th : TPT1 ADT-CD49fmid	RUNX3
DNAJB4	2.43363e-13	-0.465111	0.16	0.263	1.09973e-08	C01 - CD4+ Th : TPT1 ADT-CD49fmid	DNAJB4
FAM107B	2.49973e-13	0.374166	0.712	0.61	1.1296e-08	C01 - CD4+ Th : TPT1 ADT-CD49fmid	FAM107B
HSPB1	2.74319e-13	-0.470838	0.362	0.46	1.23962e-08	C01 - CD4+ Th : TPT1 ADT-CD49fmid	HSPB1
IL32	3.01614e-13	-0.413057	0.883	0.861	1.36296e-08	C01 - CD4+ Th : TPT1 ADT-CD49fmid	IL32
SH3BGRL3	7.42559e-13	0.267067	0.94	0.901	3.35555e-08	C01 - CD4+ Th : TPT1 ADT-CD49fmid	SH3BGRL3
SRSF7	9.83045e-13	-0.299168	0.916	0.928	4.44228e-08	C01 - CD4+ Th : TPT1 ADT-CD49fmid	SRSF7
CTLA4	1.21731e-12	-0.670047	0.215	0.29	5.50091e-08	C01 - CD4+ Th : TPT1 ADT-CD49fmid	CTLA4
HCST	1.2625e-12	-0.274786	0.77	0.759	5.70512e-08	C01 - CD4+ Th : TPT1 ADT-CD49fmid	HCST
PSMB9	1.33429e-12	-0.327343	0.499	0.585	6.02952e-08	C01 - CD4+ Th : TPT1 ADT-CD49fmid	PSMB9
CD5	1.57298e-12	0.32496	0.305	0.199	7.10815e-08	C01 - CD4+ Th : TPT1 ADT-CD49fmid	CD5
AHSA1	3.13485e-12	-0.384384	0.329	0.446	1.41661e-07	C01 - CD4+ Th : TPT1 ADT-CD49fmid	AHSA1
ATP5L	3.35566e-12	-0.26681	0.319	0.446	1.51639e-07	C01 - CD4+ Th : TPT1 ADT-CD49fmid	ATP5L
NT5C	3.55129e-12	-0.317935	0.13	0.234	1.60479e-07	C01 - CD4+ Th : TPT1 ADT-CD49fmid	NT5C
PKM	4.07138e-12	-0.377858	0.407	0.433	1.83981e-07	C01 - CD4+ Th : TPT1 ADT-CD49fmid	PKM
CALM3	4.44419e-12	-0.320059	0.384	0.441	2.00829e-07	C01 - CD4+ Th : TPT1 ADT-CD49fmid	CALM3
ALOX5AP	5.77751e-12	0.270094	0.56	0.429	2.6108e-07	C01 - CD4+ Th : TPT1 ADT-CD49fmid	ALOX5AP
IL21R	5.88993e-12	-0.276576	0.075	0.159	2.6616e-07	C01 - CD4+ Th : TPT1 ADT-CD49fmid	IL21R
ABRACL	6.64983e-12	0.315895	0.591	0.467	3.00499e-07	C01 - CD4+ Th : TPT1 ADT-CD49fmid	ABRACL
HLA-DRB5	6.8121e-12	-0.407209	0.115	0.213	3.07832e-07	C01 - CD4+ Th : TPT1 ADT-CD49fmid	HLA-DRB5
TTN	6.85067e-12	-0.399322	0.042	0.114	3.09575e-07	C01 - CD4+ Th : TPT1 ADT-CD49fmid	TTN
EEF2	8.22314e-12	0.262917	0.828	0.772	3.71595e-07	C01 - CD4+ Th : TPT1 ADT-CD49fmid	EEF2
GLIPR1	1.22375e-11	0.362079	0.464	0.353	5.53003e-07	C01 - CD4+ Th : TPT1 ADT-CD49fmid	GLIPR1
ITM2B	1.56133e-11	0.270481	0.906	0.853	7.05549e-07	C01 - CD4+ Th : TPT1 ADT-CD49fmid	ITM2B
CHST12	2.03372e-11	-0.351169	0.122	0.211	9.19015e-07	C01 - CD4+ Th : TPT1 ADT-CD49fmid	CHST12
PTPN7	2.30381e-11	-0.358695	0.26	0.36	1.04107e-06	C01 - CD4+ Th : TPT1 ADT-CD49fmid	PTPN7
CACYBP	2.40226e-11	-0.429859	0.42	0.505	1.08556e-06	C01 - CD4+ Th : TPT1 ADT-CD49fmid	CACYBP
MT-ND4L	2.56746e-11	-0.349703	0.597	0.674	1.16021e-06	C01 - CD4+ Th : TPT1 ADT-CD49fmid	MT-ND4L
TENT5C	3.14624e-11	0.308517	0.321	0.211	1.42175e-06	C01 - CD4+ Th : TPT1 ADT-CD49fmid	TENT5C
TNFRSF25	3.6829e-11	0.294533	0.38	0.265	1.66427e-06	C01 - CD4+ Th : TPT1 ADT-CD49fmid	TNFRSF25
ATP8A1	3.754e-11	-0.251668	0.049	0.121	1.69639e-06	C01 - CD4+ Th : TPT1 ADT-CD49fmid	ATP8A1
C19orf43	3.86968e-11	-0.30123	0.265	0.384	1.74867e-06	C01 - CD4+ Th : TPT1 ADT-CD49fmid	C19orf43
ACP5	6.56501e-11	-0.274989	0.068	0.144	2.96666e-06	C01 - CD4+ Th : TPT1 ADT-CD49fmid	ACP5
ATP5E	6.92508e-11	-0.299134	0.377	0.499	3.12937e-06	C01 - CD4+ Th : TPT1 ADT-CD49fmid	ATP5E
GLCCI1	7.58814e-11	-0.334104	0.129	0.216	3.42901e-06	C01 - CD4+ Th : TPT1 ADT-CD49fmid	GLCCI1
IQGAP1	7.63317e-11	-0.334333	0.426	0.508	3.44935e-06	C01 - CD4+ Th : TPT1 ADT-CD49fmid	IQGAP1
KLRB1	8.44691e-11	0.486005	0.381	0.268	3.81707e-06	C01 - CD4+ Th : TPT1 ADT-CD49fmid	KLRB1
STMN1	9.13056e-11	-0.617358	0.172	0.251	4.12601e-06	C01 - CD4+ Th : TPT1 ADT-CD49fmid	STMN1
NEMF	9.31409e-11	-0.306259	0.127	0.222	4.20895e-06	C01 - CD4+ Th : TPT1 ADT-CD49fmid	NEMF
C1orf162	1.11694e-10	0.308086	0.227	0.138	5.04734e-06	C01 - CD4+ Th : TPT1 ADT-CD49fmid	C1orf162
RPL36A	1.49046e-10	0.263845	0.751	0.657	6.73523e-06	C01 - CD4+ Th : TPT1 ADT-CD49fmid	RPL36A
FKBP11	1.79859e-10	0.252835	0.291	0.189	8.12763e-06	C01 - CD4+ Th : TPT1 ADT-CD49fmid	FKBP11
CDKN1A	2.4804e-10	0.295819	0.416	0.307	1.12087e-05	C01 - CD4+ Th : TPT1 ADT-CD49fmid	CDKN1A
CD9	2.61931e-10	-0.281051	0.042	0.106	1.18364e-05	C01 - CD4+ Th : TPT1 ADT-CD49fmid	CD9
PTTG1	2.65564e-10	-0.357491	0.179	0.255	1.20006e-05	C01 - CD4+ Th : TPT1 ADT-CD49fmid	PTTG1
TYMP	3.19588e-10	-0.387152	0.361	0.425	1.44419e-05	C01 - CD4+ Th : TPT1 ADT-CD49fmid	TYMP
ID2	3.93867e-10	-0.416208	0.59	0.67	1.77985e-05	C01 - CD4+ Th : TPT1 ADT-CD49fmid	ID2
MAFF	4.32496e-10	-0.36578	0.114	0.186	1.9544e-05	C01 - CD4+ Th : TPT1 ADT-CD49fmid	MAFF
ATP5D	4.39459e-10	-0.334948	0.191	0.281	1.98587e-05	C01 - CD4+ Th : TPT1 ADT-CD49fmid	ATP5D
SRSF3	4.80554e-10	-0.279609	0.687	0.732	2.17158e-05	C01 - CD4+ Th : TPT1 ADT-CD49fmid	SRSF3
PLCG2	5.05118e-10	-0.383646	0.075	0.149	2.28258e-05	C01 - CD4+ Th : TPT1 ADT-CD49fmid	PLCG2
NR4A1	5.06547e-10	-0.415454	0.344	0.455	2.28903e-05	C01 - CD4+ Th : TPT1 ADT-CD49fmid	NR4A1
CBLB	5.10546e-10	-0.340503	0.202	0.288	2.30711e-05	C01 - CD4+ Th : TPT1 ADT-CD49fmid	CBLB
ALDOA	5.51791e-10	-0.342784	0.3	0.407	2.49349e-05	C01 - CD4+ Th : TPT1 ADT-CD49fmid	ALDOA
MSI2	5.8541e-10	-0.347965	0.171	0.259	2.64541e-05	C01 - CD4+ Th : TPT1 ADT-CD49fmid	MSI2
AC133644.2	6.31865e-10	-0.319539	0.056	0.111	2.85533e-05	C01 - CD4+ Th : TPT1 ADT-CD49fmid	AC133644.2
EGR1	7.07649e-10	-0.463827	0.215	0.31	3.19779e-05	C01 - CD4+ Th : TPT1 ADT-CD49fmid	EGR1
FOXP1	7.86421e-10	0.297599	0.486	0.373	3.55376e-05	C01 - CD4+ Th : TPT1 ADT-CD49fmid	FOXP1
HLA-DQB1	7.96614e-10	-0.388163	0.23	0.322	3.59982e-05	C01 - CD4+ Th : TPT1 ADT-CD49fmid	HLA-DQB1
GAPDH	9.33053e-10	-0.287193	0.922	0.903	4.21637e-05	C01 - CD4+ Th : TPT1 ADT-CD49fmid	GAPDH
ATP2B1	9.8276e-10	0.258933	0.473	0.36	4.44099e-05	C01 - CD4+ Th : TPT1 ADT-CD49fmid	ATP2B1
CLIC3	9.87515e-10	-0.369447	0.063	0.124	4.46248e-05	C01 - CD4+ Th : TPT1 ADT-CD49fmid	CLIC3
APOBEC3C	1.46707e-09	-0.292592	0.142	0.234	6.62956e-05	C01 - CD4+ Th : TPT1 ADT-CD49fmid	APOBEC3C
TCEB2	2.02108e-09	-0.317545	0.209	0.307	9.13305e-05	C01 - CD4+ Th : TPT1 ADT-CD49fmid	TCEB2
IGKC	2.11723e-09	-0.711477	0.242	0.341	9.56753e-05	C01 - CD4+ Th : TPT1 ADT-CD49fmid	IGKC
ATP5G2	2.39299e-09	-0.261777	0.293	0.403	0.000108137	C01 - CD4+ Th : TPT1 ADT-CD49fmid	ATP5G2
SF3B1	2.80941e-09	-0.27635	0.478	0.545	0.000126954	C01 - CD4+ Th : TPT1 ADT-CD49fmid	SF3B1
RHOC	3.02357e-09	-0.260664	0.176	0.272	0.000136632	C01 - CD4+ Th : TPT1 ADT-CD49fmid	RHOC
C9orf142	3.46663e-09	-0.301348	0.153	0.243	0.000156653	C01 - CD4+ Th : TPT1 ADT-CD49fmid	C9orf142
ARPC5L	3.85205e-09	-0.304245	0.222	0.304	0.00017407	C01 - CD4+ Th : TPT1 ADT-CD49fmid	ARPC5L
GPX1	4.09568e-09	-0.337674	0.152	0.235	0.00018508	C01 - CD4+ Th : TPT1 ADT-CD49fmid	GPX1
DNPH1	4.14597e-09	-0.294895	0.244	0.279	0.000187352	C01 - CD4+ Th : TPT1 ADT-CD49fmid	DNPH1
ARHGAP9	4.17372e-09	-0.307928	0.265	0.349	0.000188606	C01 - CD4+ Th : TPT1 ADT-CD49fmid	ARHGAP9
FABP5	4.18444e-09	-0.356718	0.197	0.292	0.000189091	C01 - CD4+ Th : TPT1 ADT-CD49fmid	FABP5
DUSP1	4.30251e-09	-0.257996	0.9	0.877	0.000194426	C01 - CD4+ Th : TPT1 ADT-CD49fmid	DUSP1
HTATIP2	5.36332e-09	-0.299969	0.108	0.183	0.000242363	C01 - CD4+ Th : TPT1 ADT-CD49fmid	HTATIP2
RCAN3	5.5822e-09	0.273055	0.447	0.341	0.000252254	C01 - CD4+ Th : TPT1 ADT-CD49fmid	RCAN3
PTK2B	5.92749e-09	-0.270386	0.108	0.189	0.000267857	C01 - CD4+ Th : TPT1 ADT-CD49fmid	PTK2B
TUBA4A	6.05252e-09	-0.444896	0.54	0.578	0.000273507	C01 - CD4+ Th : TPT1 ADT-CD49fmid	TUBA4A
FAM43A	6.40647e-09	-0.291986	0.077	0.144	0.000289502	C01 - CD4+ Th : TPT1 ADT-CD49fmid	FAM43A
KDSR	7.3445e-09	0.268357	0.274	0.191	0.000331891	C01 - CD4+ Th : TPT1 ADT-CD49fmid	KDSR
PTPN22	7.87105e-09	-0.350053	0.377	0.452	0.000355685	C01 - CD4+ Th : TPT1 ADT-CD49fmid	PTPN22
MT2A	8.64376e-09	-0.405789	0.459	0.53	0.000390603	C01 - CD4+ Th : TPT1 ADT-CD49fmid	MT2A
CCL20	9.22632e-09	0.36193	0.13	0.067	0.000416928	C01 - CD4+ Th : TPT1 ADT-CD49fmid	CCL20
CMPK1	1.03997e-08	0.284785	0.419	0.321	0.000469954	C01 - CD4+ Th : TPT1 ADT-CD49fmid	CMPK1
MIR4435-2HG	1.04567e-08	-0.342312	0.127	0.207	0.000472529	C01 - CD4+ Th : TPT1 ADT-CD49fmid	MIR4435-2HG
HLA-DQA2	1.04698e-08	-0.270165	0.051	0.112	0.000473118	C01 - CD4+ Th : TPT1 ADT-CD49fmid	HLA-DQA2
TRBC2	1.35349e-08	0.281555	0.795	0.729	0.000611631	C01 - CD4+ Th : TPT1 ADT-CD49fmid	TRBC2
SERPINB9	1.38495e-08	-0.337601	0.269	0.36	0.000625846	C01 - CD4+ Th : TPT1 ADT-CD49fmid	SERPINB9
BACH1	1.57131e-08	-0.301333	0.138	0.209	0.000710058	C01 - CD4+ Th : TPT1 ADT-CD49fmid	BACH1
GZMA	1.59512e-08	-0.384565	0.399	0.463	0.000720819	C01 - CD4+ Th : TPT1 ADT-CD49fmid	GZMA
MRPS6	1.8585e-08	-0.311626	0.304	0.405	0.000839836	C01 - CD4+ Th : TPT1 ADT-CD49fmid	MRPS6
WHSC1L1	1.86062e-08	-0.305191	0.193	0.288	0.000840797	C01 - CD4+ Th : TPT1 ADT-CD49fmid	WHSC1L1
BST2	2.33226e-08	-0.308185	0.38	0.467	0.00105393	C01 - CD4+ Th : TPT1 ADT-CD49fmid	BST2
CTSD	2.42416e-08	-0.289574	0.355	0.451	0.00109545	C01 - CD4+ Th : TPT1 ADT-CD49fmid	CTSD
GBP5	2.73588e-08	-0.355277	0.253	0.329	0.00123632	C01 - CD4+ Th : TPT1 ADT-CD49fmid	GBP5
JAK1	2.88097e-08	-0.278431	0.478	0.539	0.00130188	C01 - CD4+ Th : TPT1 ADT-CD49fmid	JAK1
AKNA	3.23533e-08	-0.339679	0.263	0.347	0.00146201	C01 - CD4+ Th : TPT1 ADT-CD49fmid	AKNA
MGEA5	3.58998e-08	-0.276473	0.123	0.202	0.00162227	C01 - CD4+ Th : TPT1 ADT-CD49fmid	MGEA5
SQSTM1	3.61322e-08	-0.325397	0.552	0.609	0.00163278	C01 - CD4+ Th : TPT1 ADT-CD49fmid	SQSTM1
CFLAR	3.6642e-08	-0.317671	0.423	0.488	0.00165582	C01 - CD4+ Th : TPT1 ADT-CD49fmid	CFLAR
OTULIN	3.78271e-08	-0.265691	0.125	0.204	0.00170937	C01 - CD4+ Th : TPT1 ADT-CD49fmid	OTULIN
PAPOLA	3.9988e-08	-0.273393	0.401	0.484	0.00180702	C01 - CD4+ Th : TPT1 ADT-CD49fmid	PAPOLA
PPP1R10	4.2604e-08	-0.304879	0.365	0.46	0.00192523	C01 - CD4+ Th : TPT1 ADT-CD49fmid	PPP1R10
TSPYL2	4.65127e-08	-0.393127	0.367	0.441	0.00210186	C01 - CD4+ Th : TPT1 ADT-CD49fmid	TSPYL2
PHLDA1	4.75539e-08	-0.311648	0.46	0.472	0.00214891	C01 - CD4+ Th : TPT1 ADT-CD49fmid	PHLDA1
RTKN2	5.03333e-08	-0.305271	0.053	0.114	0.00227451	C01 - CD4+ Th : TPT1 ADT-CD49fmid	RTKN2
DEDD2	5.91562e-08	-0.277839	0.368	0.415	0.00267321	C01 - CD4+ Th : TPT1 ADT-CD49fmid	DEDD2
TPST2	5.97119e-08	-0.251083	0.144	0.225	0.00269832	C01 - CD4+ Th : TPT1 ADT-CD49fmid	TPST2
IER2	6.4948e-08	-0.33393	0.773	0.778	0.00293493	C01 - CD4+ Th : TPT1 ADT-CD49fmid	IER2
EPSTI1	6.51831e-08	-0.310209	0.235	0.317	0.00294556	C01 - CD4+ Th : TPT1 ADT-CD49fmid	EPSTI1
NUDC	6.68229e-08	-0.274962	0.327	0.402	0.00301966	C01 - CD4+ Th : TPT1 ADT-CD49fmid	NUDC
ZFAND2A	6.92982e-08	-0.394463	0.215	0.292	0.00313151	C01 - CD4+ Th : TPT1 ADT-CD49fmid	ZFAND2A
FUS	7.41606e-08	-0.290086	0.864	0.887	0.00335124	C01 - CD4+ Th : TPT1 ADT-CD49fmid	FUS
PPM1G	7.78107e-08	-0.274338	0.246	0.313	0.00351619	C01 - CD4+ Th : TPT1 ADT-CD49fmid	PPM1G
STIP1	7.91526e-08	-0.279671	0.198	0.283	0.00357682	C01 - CD4+ Th : TPT1 ADT-CD49fmid	STIP1
UBC	8.06172e-08	-0.264009	0.976	0.97	0.00364301	C01 - CD4+ Th : TPT1 ADT-CD49fmid	UBC
DNAJA4	8.08851e-08	-0.336853	0.107	0.176	0.00365512	C01 - CD4+ Th : TPT1 ADT-CD49fmid	DNAJA4
SAT1	8.78256e-08	-0.343561	0.796	0.786	0.00396875	C01 - CD4+ Th : TPT1 ADT-CD49fmid	SAT1
NUCB2	8.99639e-08	-0.28752	0.14	0.203	0.00406538	C01 - CD4+ Th : TPT1 ADT-CD49fmid	NUCB2
MRPL18	9.91297e-08	-0.348803	0.319	0.408	0.00447957	C01 - CD4+ Th : TPT1 ADT-CD49fmid	MRPL18
CCND2	1.23335e-07	-0.253925	0.333	0.359	0.00557337	C01 - CD4+ Th : TPT1 ADT-CD49fmid	CCND2
mm10---Gm42418	1.28775e-07	-0.32611	0.898	0.937	0.0058192	C01 - CD4+ Th : TPT1 ADT-CD49fmid	mm10---Gm42418
RILPL2	1.82057e-07	0.272827	0.445	0.368	0.00822695	C01 - CD4+ Th : TPT1 ADT-CD49fmid	RILPL2
IGHG4	2.02815e-07	-0.397012	0.085	0.145	0.00916502	C01 - CD4+ Th : TPT1 ADT-CD49fmid	IGHG4
EIF4A3	2.3761e-07	-0.290246	0.603	0.611	0.0107374	C01 - CD4+ Th : TPT1 ADT-CD49fmid	EIF4A3
SP100	2.59034e-07	-0.255625	0.425	0.509	0.0117055	C01 - CD4+ Th : TPT1 ADT-CD49fmid	SP100
CD83	2.85886e-07	-0.43994	0.24	0.293	0.0129189	C01 - CD4+ Th : TPT1 ADT-CD49fmid	CD83
PRDM2	3.09774e-07	-0.264186	0.367	0.401	0.0139984	C01 - CD4+ Th : TPT1 ADT-CD49fmid	PRDM2
CAPG	3.21002e-07	0.278067	0.312	0.236	0.0145057	C01 - CD4+ Th : TPT1 ADT-CD49fmid	CAPG
SH2D1A	3.6852e-07	-0.287317	0.227	0.304	0.016653	C01 - CD4+ Th : TPT1 ADT-CD49fmid	SH2D1A
YIPF5	3.69774e-07	0.256977	0.302	0.224	0.0167097	C01 - CD4+ Th : TPT1 ADT-CD49fmid	YIPF5
MIAT	4.4508e-07	-0.297667	0.159	0.214	0.0201127	C01 - CD4+ Th : TPT1 ADT-CD49fmid	MIAT
NAMPT	4.63699e-07	-0.342735	0.395	0.438	0.0209541	C01 - CD4+ Th : TPT1 ADT-CD49fmid	NAMPT
RGS2	4.66363e-07	-0.366606	0.401	0.468	0.0210745	C01 - CD4+ Th : TPT1 ADT-CD49fmid	RGS2
H2AFX	5.59224e-07	-0.30167	0.393	0.44	0.0252708	C01 - CD4+ Th : TPT1 ADT-CD49fmid	H2AFX
RNF213	6.94221e-07	-0.317851	0.558	0.601	0.0313712	C01 - CD4+ Th : TPT1 ADT-CD49fmid	RNF213
ADGRE5	8.30158e-07	-0.269173	0.503	0.55	0.037514	C01 - CD4+ Th : TPT1 ADT-CD49fmid	ADGRE5
JUN	8.91106e-07	-0.337671	0.821	0.851	0.0402682	C01 - CD4+ Th : TPT1 ADT-CD49fmid	JUN
AREG	9.12964e-07	-0.450318	0.337	0.332	0.0412559	C01 - CD4+ Th : TPT1 ADT-CD49fmid	AREG
ZNF331	1.14786e-06	-0.256547	0.617	0.615	0.0518708	C01 - CD4+ Th : TPT1 ADT-CD49fmid	ZNF331
GBP2	1.30771e-06	-0.283251	0.345	0.42	0.0590939	C01 - CD4+ Th : TPT1 ADT-CD49fmid	GBP2
TBC1D4	1.42145e-06	-0.311817	0.138	0.194	0.064234	C01 - CD4+ Th : TPT1 ADT-CD49fmid	TBC1D4
CLEC2B	1.56162e-06	-0.339237	0.471	0.512	0.0705682	C01 - CD4+ Th : TPT1 ADT-CD49fmid	CLEC2B
RGS1	1.57001e-06	-0.306088	0.667	0.677	0.0709472	C01 - CD4+ Th : TPT1 ADT-CD49fmid	RGS1
LITAF	1.68416e-06	-0.278353	0.45	0.48	0.0761055	C01 - CD4+ Th : TPT1 ADT-CD49fmid	LITAF
DUSP10	1.90601e-06	-0.25351	0.187	0.264	0.0861305	C01 - CD4+ Th : TPT1 ADT-CD49fmid	DUSP10
GLRX	2.49831e-06	-0.301002	0.24	0.305	0.112896	C01 - CD4+ Th : TPT1 ADT-CD49fmid	GLRX
POU3F1	2.91328e-06	-0.258396	0.07	0.121	0.131648	C01 - CD4+ Th : TPT1 ADT-CD49fmid	POU3F1
SRSF11	3.2002e-06	-0.257637	0.473	0.523	0.144614	C01 - CD4+ Th : TPT1 ADT-CD49fmid	SRSF11
BTN3A2	3.39237e-06	-0.263264	0.307	0.382	0.153298	C01 - CD4+ Th : TPT1 ADT-CD49fmid	BTN3A2
PPP1R14B	3.68769e-06	-0.316487	0.263	0.31	0.166643	C01 - CD4+ Th : TPT1 ADT-CD49fmid	PPP1R14B
SMG1	4.89687e-06	-0.255176	0.314	0.383	0.221284	C01 - CD4+ Th : TPT1 ADT-CD49fmid	SMG1
MTRNR2L12	5.0015e-06	-0.259981	0.764	0.819	0.226013	C01 - CD4+ Th : TPT1 ADT-CD49fmid	MTRNR2L12
KLRG1	5.13201e-06	-0.261673	0.085	0.131	0.231911	C01 - CD4+ Th : TPT1 ADT-CD49fmid	KLRG1
RAB11FIP1	6.85623e-06	-0.256692	0.318	0.337	0.309826	C01 - CD4+ Th : TPT1 ADT-CD49fmid	RAB11FIP1
UCP2	7.08103e-06	-0.255958	0.33	0.372	0.319985	C01 - CD4+ Th : TPT1 ADT-CD49fmid	UCP2
HSPA6	7.17308e-06	-0.770225	0.081	0.129	0.324144	C01 - CD4+ Th : TPT1 ADT-CD49fmid	HSPA6
IER3	7.67094e-06	-0.357004	0.148	0.213	0.346642	C01 - CD4+ Th : TPT1 ADT-CD49fmid	IER3
ATRX	8.16548e-06	-0.286855	0.44	0.5	0.36899	C01 - CD4+ Th : TPT1 ADT-CD49fmid	ATRX
SNX9	9.31817e-06	-0.277097	0.184	0.238	0.421079	C01 - CD4+ Th : TPT1 ADT-CD49fmid	SNX9
HOPX	9.9171e-06	-0.274891	0.261	0.263	0.448144	C01 - CD4+ Th : TPT1 ADT-CD49fmid	HOPX
RP11-796E2.4	1.05189e-05	-0.267387	0.088	0.142	0.475338	C01 - CD4+ Th : TPT1 ADT-CD49fmid	RP11-796E2.4
GADD45B	1.48472e-05	-0.377266	0.578	0.616	0.670932	C01 - CD4+ Th : TPT1 ADT-CD49fmid	GADD45B
ATM	1.5283e-05	-0.283987	0.291	0.351	0.690625	C01 - CD4+ Th : TPT1 ADT-CD49fmid	ATM
TUBB	1.87007e-05	-0.336786	0.278	0.311	0.845068	C01 - CD4+ Th : TPT1 ADT-CD49fmid	TUBB
ANKRD37	1.87559e-05	-0.29175	0.257	0.322	0.847561	C01 - CD4+ Th : TPT1 ADT-CD49fmid	ANKRD37
PRPF4B	3.06745e-05	-0.254691	0.26	0.33	1	C01 - CD4+ Th : TPT1 ADT-CD49fmid	PRPF4B
ZNF292	3.5829e-05	-0.253082	0.289	0.355	1	C01 - CD4+ Th : TPT1 ADT-CD49fmid	ZNF292
LDLRAD4	4.207e-05	-0.335016	0.244	0.289	1	C01 - CD4+ Th : TPT1 ADT-CD49fmid	LDLRAD4
PLIN2	4.74433e-05	0.299628	0.361	0.301	1	C01 - CD4+ Th : TPT1 ADT-CD49fmid	PLIN2
GK	7.02259e-05	-0.322929	0.098	0.149	1	C01 - CD4+ Th : TPT1 ADT-CD49fmid	GK
ATF3	7.41166e-05	-0.372217	0.311	0.366	1	C01 - CD4+ Th : TPT1 ADT-CD49fmid	ATF3
NEU1	0.000101972	-0.263533	0.514	0.529	1	C01 - CD4+ Th : TPT1 ADT-CD49fmid	NEU1
NMB	0.000126029	-0.495272	0.089	0.113	1	C01 - CD4+ Th : TPT1 ADT-CD49fmid	NMB
HIST1H4C	0.000173083	-0.289867	0.337	0.371	1	C01 - CD4+ Th : TPT1 ADT-CD49fmid	HIST1H4C
HMGB2	0.000178235	-0.303727	0.496	0.525	1	C01 - CD4+ Th : TPT1 ADT-CD49fmid	HMGB2
FOSB	0.000459416	-0.266117	0.866	0.859	1	C01 - CD4+ Th : TPT1 ADT-CD49fmid	FOSB
GPR183.1	1.78259e-170	1.56362	0.789	0.344	8.05536e-166	C02 - CD4+ Th : GPR183 ADT-CD49fhi	GPR183
ANXA1.1	1.08502e-141	1.32896	0.939	0.642	4.90311e-137	C02 - CD4+ Th : GPR183 ADT-CD49fhi	ANXA1
NKG7.1	2.0335e-119	-2.72544	0.062	0.407	9.18919e-115	C02 - CD4+ Th : GPR183 ADT-CD49fhi	NKG7
IL7R.1	1.46755e-112	0.846879	0.952	0.653	6.6317e-108	C02 - CD4+ Th : GPR183 ADT-CD49fhi	IL7R
CCR7.1	7.96567e-112	1.39921	0.598	0.231	3.59961e-107	C02 - CD4+ Th : GPR183 ADT-CD49fhi	CCR7
LMNA.1	1.21828e-102	1.23889	0.876	0.611	5.5053e-98	C02 - CD4+ Th : GPR183 ADT-CD49fhi	LMNA
FTH1.1	1.7015e-101	0.980156	0.997	0.968	7.6889e-97	C02 - CD4+ Th : GPR183 ADT-CD49fhi	FTH1
TPT1.1	3.48334e-96	0.535629	0.999	0.991	1.57409e-91	C02 - CD4+ Th : GPR183 ADT-CD49fhi	TPT1
CCL4.1	6.63533e-95	-3.85268	0.125	0.434	2.99844e-90	C02 - CD4+ Th : GPR183 ADT-CD49fhi	CCL4
ZNF165	8.68138e-88	0.807603	0.352	0.079	3.92303e-83	C02 - CD4+ Th : GPR183 ADT-CD49fhi	ZNF165
RPL3.1	1.00018e-77	0.512996	0.994	0.974	4.51973e-73	C02 - CD4+ Th : GPR183 ADT-CD49fhi	RPL3
PABPC1.1	4.34462e-75	0.647812	0.957	0.829	1.96329e-70	C02 - CD4+ Th : GPR183 ADT-CD49fhi	PABPC1
KLRD1.1	1.92993e-73	-1.49671	0.013	0.236	8.72118e-69	C02 - CD4+ Th : GPR183 ADT-CD49fhi	KLRD1
HLA-DPA1.1	4.56409e-72	-1.12632	0.301	0.567	2.06247e-67	C02 - CD4+ Th : GPR183 ADT-CD49fhi	HLA-DPA1
CD8A.1	1.34642e-71	-1.39986	0.024	0.263	6.08432e-67	C02 - CD4+ Th : GPR183 ADT-CD49fhi	CD8A
CST7.1	1.05952e-70	-1.24842	0.264	0.537	4.78785e-66	C02 - CD4+ Th : GPR183 ADT-CD49fhi	CST7
IL32.1	1.33487e-70	-0.915733	0.886	0.861	6.03212e-66	C02 - CD4+ Th : GPR183 ADT-CD49fhi	IL32
RPL32.1	7.71518e-69	0.487434	0.996	0.981	3.48641e-64	C02 - CD4+ Th : GPR183 ADT-CD49fhi	RPL32
TIGIT.1	2.06471e-67	-1.25192	0.095	0.369	9.33021e-63	C02 - CD4+ Th : GPR183 ADT-CD49fhi	TIGIT
HLA-C	6.44721e-66	-0.494422	0.994	0.982	2.91343e-61	C02 - CD4+ Th : GPR183 ADT-CD49fhi	HLA-C
RPS12.1	1.2384e-65	0.455473	0.995	0.99	5.59619e-61	C02 - CD4+ Th : GPR183 ADT-CD49fhi	RPS12
ACTB	5.14006e-65	-0.674501	0.989	0.975	2.32274e-60	C02 - CD4+ Th : GPR183 ADT-CD49fhi	ACTB
CD8B.1	6.46432e-65	-1.07776	0.013	0.221	2.92116e-60	C02 - CD4+ Th : GPR183 ADT-CD49fhi	CD8B
HLA-DPB1.1	3.89584e-64	-1.02176	0.317	0.571	1.76049e-59	C02 - CD4+ Th : GPR183 ADT-CD49fhi	HLA-DPB1
EZR	1.69653e-62	0.743116	0.879	0.723	7.66643e-58	C02 - CD4+ Th : GPR183 ADT-CD49fhi	EZR
RGCC	2.44984e-62	0.669141	0.952	0.793	1.10706e-57	C02 - CD4+ Th : GPR183 ADT-CD49fhi	RGCC
RPL30.1	5.65249e-62	0.427045	0.999	0.984	2.5543e-57	C02 - CD4+ Th : GPR183 ADT-CD49fhi	RPL30
EEF1A1.1	5.03874e-61	0.435572	0.997	0.991	2.27695e-56	C02 - CD4+ Th : GPR183 ADT-CD49fhi	EEF1A1
CD74.1	1.7798e-60	-1.00691	0.587	0.723	8.04275e-56	C02 - CD4+ Th : GPR183 ADT-CD49fhi	CD74
GRASP	2.38317e-60	0.643155	0.359	0.115	1.07693e-55	C02 - CD4+ Th : GPR183 ADT-CD49fhi	GRASP
YPEL5	3.31254e-59	0.605035	0.927	0.741	1.4969e-54	C02 - CD4+ Th : GPR183 ADT-CD49fhi	YPEL5
HLA-DRB1.1	1.39002e-58	-1.23332	0.319	0.554	6.28138e-54	C02 - CD4+ Th : GPR183 ADT-CD49fhi	HLA-DRB1
RPS16.1	4.09383e-57	0.423786	0.992	0.971	1.84996e-52	C02 - CD4+ Th : GPR183 ADT-CD49fhi	RPS16
RPS23.1	1.85276e-56	0.399157	0.995	0.98	8.37242e-52	C02 - CD4+ Th : GPR183 ADT-CD49fhi	RPS23
RPS13.1	1.87331e-56	0.466613	0.991	0.957	8.46528e-52	C02 - CD4+ Th : GPR183 ADT-CD49fhi	RPS13
XCL2.1	1.96633e-55	-1.83766	0.021	0.214	8.88564e-51	C02 - CD4+ Th : GPR183 ADT-CD49fhi	XCL2
RPS4X.1	2.57755e-55	0.411464	0.996	0.977	1.16477e-50	C02 - CD4+ Th : GPR183 ADT-CD49fhi	RPS4X
RPL9.1	2.79909e-55	0.424583	0.994	0.973	1.26488e-50	C02 - CD4+ Th : GPR183 ADT-CD49fhi	RPL9
CDKN1A.1	3.95841e-55	0.69923	0.561	0.291	1.78877e-50	C02 - CD4+ Th : GPR183 ADT-CD49fhi	CDKN1A
RPS3A.1	5.66833e-55	0.442935	0.996	0.976	2.56146e-50	C02 - CD4+ Th : GPR183 ADT-CD49fhi	RPS3A
CD55	7.66304e-55	0.703299	0.65	0.365	3.46285e-50	C02 - CD4+ Th : GPR183 ADT-CD49fhi	CD55
RPS6.1	8.61061e-55	0.440883	0.996	0.972	3.89105e-50	C02 - CD4+ Th : GPR183 ADT-CD49fhi	RPS6
PFN1	2.40474e-54	-0.608514	0.879	0.877	1.08668e-49	C02 - CD4+ Th : GPR183 ADT-CD49fhi	PFN1
RPS27A.1	2.51494e-53	0.38981	0.996	0.984	1.13648e-48	C02 - CD4+ Th : GPR183 ADT-CD49fhi	RPS27A
RPL34.1	4.35292e-53	0.409837	0.994	0.978	1.96704e-48	C02 - CD4+ Th : GPR183 ADT-CD49fhi	RPL34
ZFP36	4.85028e-53	0.559267	0.957	0.829	2.19179e-48	C02 - CD4+ Th : GPR183 ADT-CD49fhi	ZFP36
RPS8.1	3.31488e-52	0.450361	0.992	0.971	1.49796e-47	C02 - CD4+ Th : GPR183 ADT-CD49fhi	RPS8
GAPDH.1	4.88319e-52	-0.735298	0.903	0.905	2.20666e-47	C02 - CD4+ Th : GPR183 ADT-CD49fhi	GAPDH
EIF1	4.90986e-52	0.355055	0.997	0.986	2.21872e-47	C02 - CD4+ Th : GPR183 ADT-CD49fhi	EIF1
RPS14.1	9.65641e-51	0.388337	0.992	0.977	4.36363e-46	C02 - CD4+ Th : GPR183 ADT-CD49fhi	RPS14
RPS3.1	1.78534e-50	0.384366	0.996	0.976	8.06776e-46	C02 - CD4+ Th : GPR183 ADT-CD49fhi	RPS3
JUND	2.42423e-50	0.441427	0.985	0.935	1.09549e-45	C02 - CD4+ Th : GPR183 ADT-CD49fhi	JUND
GZMB.1	1.79323e-49	-1.46066	0.009	0.167	8.10343e-45	C02 - CD4+ Th : GPR183 ADT-CD49fhi	GZMB
CTSW.1	3.53162e-49	-1.12892	0.072	0.274	1.5959e-44	C02 - CD4+ Th : GPR183 ADT-CD49fhi	CTSW
KLF2	7.47564e-49	0.475918	0.84	0.583	3.37817e-44	C02 - CD4+ Th : GPR183 ADT-CD49fhi	KLF2
CLIC1	1.26962e-48	-0.586939	0.716	0.761	5.73728e-44	C02 - CD4+ Th : GPR183 ADT-CD49fhi	CLIC1
CCL5.1	1.63627e-48	-1.09128	0.569	0.621	7.39413e-44	C02 - CD4+ Th : GPR183 ADT-CD49fhi	CCL5
CRTAM.1	4.74438e-48	-0.997648	0.008	0.16	2.14394e-43	C02 - CD4+ Th : GPR183 ADT-CD49fhi	CRTAM
RPL5.1	5.42755e-48	0.416223	0.987	0.941	2.45265e-43	C02 - CD4+ Th : GPR183 ADT-CD49fhi	RPL5
RPL11.1	1.24512e-47	0.402096	0.995	0.982	5.62656e-43	C02 - CD4+ Th : GPR183 ADT-CD49fhi	RPL11
RPL39.1	6.82242e-47	0.377561	0.994	0.977	3.08298e-42	C02 - CD4+ Th : GPR183 ADT-CD49fhi	RPL39
RPS18.1	1.5963e-46	0.383218	0.997	0.987	7.21351e-42	C02 - CD4+ Th : GPR183 ADT-CD49fhi	RPS18
RPLP2.1	1.97617e-46	0.356286	0.996	0.975	8.93014e-42	C02 - CD4+ Th : GPR183 ADT-CD49fhi	RPLP2
PLAUR	2.92252e-46	0.529727	0.255	0.075	1.32066e-41	C02 - CD4+ Th : GPR183 ADT-CD49fhi	PLAUR
TNFRSF18.1	3.29233e-46	-1.31507	0.138	0.315	1.48777e-41	C02 - CD4+ Th : GPR183 ADT-CD49fhi	TNFRSF18
RPL10.1	2.43209e-45	0.355187	0.997	0.989	1.09904e-40	C02 - CD4+ Th : GPR183 ADT-CD49fhi	RPL10
RPL13.1	4.99158e-45	0.349489	0.999	0.993	2.25565e-40	C02 - CD4+ Th : GPR183 ADT-CD49fhi	RPL13
CREM	5.62533e-45	0.563969	0.898	0.722	2.54203e-40	C02 - CD4+ Th : GPR183 ADT-CD49fhi	CREM
PLK3	4.26003e-44	0.564572	0.658	0.405	1.92506e-39	C02 - CD4+ Th : GPR183 ADT-CD49fhi	PLK3
RP1-313I6.12	4.60285e-44	0.651561	0.322	0.117	2.07998e-39	C02 - CD4+ Th : GPR183 ADT-CD49fhi	RP1-313I6.12
KDM6B	1.49559e-43	0.572186	0.712	0.466	6.75844e-39	C02 - CD4+ Th : GPR183 ADT-CD49fhi	KDM6B
MYADM	1.59891e-43	0.498496	0.823	0.59	7.22533e-39	C02 - CD4+ Th : GPR183 ADT-CD49fhi	MYADM
VIM	2.31501e-43	0.687129	0.976	0.913	1.04613e-38	C02 - CD4+ Th : GPR183 ADT-CD49fhi	VIM
MARCKSL1	3.57974e-43	0.582329	0.588	0.332	1.61765e-38	C02 - CD4+ Th : GPR183 ADT-CD49fhi	MARCKSL1
RPL35A.1	7.08611e-43	0.347191	0.989	0.965	3.20214e-38	C02 - CD4+ Th : GPR183 ADT-CD49fhi	RPL35A
CD7.1	8.53935e-43	-0.929812	0.465	0.6	3.85885e-38	C02 - CD4+ Th : GPR183 ADT-CD49fhi	CD7
HLA-DRB5.1	1.41084e-42	-0.780325	0.043	0.22	6.37544e-38	C02 - CD4+ Th : GPR183 ADT-CD49fhi	HLA-DRB5
RPL19.1	1.42175e-42	0.347745	0.995	0.981	6.42475e-38	C02 - CD4+ Th : GPR183 ADT-CD49fhi	RPL19
PRF1.1	2.65721e-42	-0.765132	0.028	0.191	1.20077e-37	C02 - CD4+ Th : GPR183 ADT-CD49fhi	PRF1
DUSP4.1	6.80928e-42	-1.0943	0.412	0.6	3.07705e-37	C02 - CD4+ Th : GPR183 ADT-CD49fhi	DUSP4
CARD16.1	1.02024e-41	-0.857159	0.168	0.364	4.61035e-37	C02 - CD4+ Th : GPR183 ADT-CD49fhi	CARD16
RPS25.1	1.18993e-41	0.333724	0.994	0.973	5.37718e-37	C02 - CD4+ Th : GPR183 ADT-CD49fhi	RPS25
TUBB4B	1.85671e-41	0.334693	0.947	0.777	8.39028e-37	C02 - CD4+ Th : GPR183 ADT-CD49fhi	TUBB4B
TNFRSF9.1	2.49337e-41	-0.926274	0.035	0.202	1.12673e-36	C02 - CD4+ Th : GPR183 ADT-CD49fhi	TNFRSF9
HSPA8.1	2.72127e-41	0.557713	0.98	0.922	1.22971e-36	C02 - CD4+ Th : GPR183 ADT-CD49fhi	HSPA8
HLA-DRA.1	3.22187e-41	-1.07831	0.246	0.438	1.45593e-36	C02 - CD4+ Th : GPR183 ADT-CD49fhi	HLA-DRA
GZMA.1	4.57459e-41	-1.12409	0.399	0.463	2.06721e-36	C02 - CD4+ Th : GPR183 ADT-CD49fhi	GZMA
APOBEC3G.1	4.59828e-41	-0.836807	0.266	0.487	2.07792e-36	C02 - CD4+ Th : GPR183 ADT-CD49fhi	APOBEC3G
HCST.1	1.40355e-40	-0.622316	0.751	0.762	6.3425e-36	C02 - CD4+ Th : GPR183 ADT-CD49fhi	HCST
SERF2	2.13266e-40	-0.393147	0.938	0.912	9.63726e-36	C02 - CD4+ Th : GPR183 ADT-CD49fhi	SERF2
CD3D	2.13689e-40	-0.338547	0.862	0.795	9.65639e-36	C02 - CD4+ Th : GPR183 ADT-CD49fhi	CD3D
LYST.1	3.03582e-40	-0.762139	0.138	0.34	1.37186e-35	C02 - CD4+ Th : GPR183 ADT-CD49fhi	LYST
PTGER4.1	3.22262e-40	0.562512	0.65	0.405	1.45627e-35	C02 - CD4+ Th : GPR183 ADT-CD49fhi	PTGER4
GNLY.1	4.19698e-40	-2.69013	0.048	0.199	1.89657e-35	C02 - CD4+ Th : GPR183 ADT-CD49fhi	GNLY
PARK7	6.45432e-40	-0.67933	0.448	0.574	2.91664e-35	C02 - CD4+ Th : GPR183 ADT-CD49fhi	PARK7
SLC2A3.1	6.97536e-40	0.582822	0.784	0.59	3.15209e-35	C02 - CD4+ Th : GPR183 ADT-CD49fhi	SLC2A3
CTLA4.1	1.3191e-39	-1.18043	0.117	0.301	5.96089e-35	C02 - CD4+ Th : GPR183 ADT-CD49fhi	CTLA4
HSPA5	1.51852e-39	0.482452	0.867	0.673	6.86202e-35	C02 - CD4+ Th : GPR183 ADT-CD49fhi	HSPA5
PSMB9.1	1.71366e-39	-0.680033	0.439	0.591	7.74386e-35	C02 - CD4+ Th : GPR183 ADT-CD49fhi	PSMB9
MCL1	2.22335e-39	0.467113	0.937	0.81	1.00471e-34	C02 - CD4+ Th : GPR183 ADT-CD49fhi	MCL1
RAC2	1.04622e-38	-0.533024	0.629	0.696	4.72778e-34	C02 - CD4+ Th : GPR183 ADT-CD49fhi	RAC2
KLRC1.1	1.75235e-38	-1.03842	0	0.108	7.91871e-34	C02 - CD4+ Th : GPR183 ADT-CD49fhi	KLRC1
CORO1A	4.18717e-38	-0.472085	0.794	0.794	1.89214e-33	C02 - CD4+ Th : GPR183 ADT-CD49fhi	CORO1A
RPL14.1	1.4532e-37	0.33823	0.992	0.967	6.56684e-33	C02 - CD4+ Th : GPR183 ADT-CD49fhi	RPL14
IKZF2.1	1.7433e-37	-0.549339	0.014	0.151	7.8778e-33	C02 - CD4+ Th : GPR183 ADT-CD49fhi	IKZF2
ARPC3	2.46765e-37	-0.475544	0.732	0.763	1.11511e-32	C02 - CD4+ Th : GPR183 ADT-CD49fhi	ARPC3
HLA-DMA.1	2.77387e-37	-0.611482	0.073	0.254	1.25348e-32	C02 - CD4+ Th : GPR183 ADT-CD49fhi	HLA-DMA
CCL4L2.1	2.89563e-37	-2.70211	0.053	0.209	1.3085e-32	C02 - CD4+ Th : GPR183 ADT-CD49fhi	CCL4L2
ARL4C.1	3.28286e-37	0.539052	0.809	0.61	1.48349e-32	C02 - CD4+ Th : GPR183 ADT-CD49fhi	ARL4C
CD40LG.1	3.68415e-37	0.678046	0.378	0.171	1.66483e-32	C02 - CD4+ Th : GPR183 ADT-CD49fhi	CD40LG
RPS27.1	3.72577e-37	0.315924	0.999	0.99	1.68364e-32	C02 - CD4+ Th : GPR183 ADT-CD49fhi	RPS27
ZNF683.1	4.32125e-37	-0.673917	0.015	0.152	1.95273e-32	C02 - CD4+ Th : GPR183 ADT-CD49fhi	ZNF683
BTG1	4.43593e-37	0.373992	0.999	0.986	2.00455e-32	C02 - CD4+ Th : GPR183 ADT-CD49fhi	BTG1
CD27.1	5.16494e-37	-0.845238	0.208	0.381	2.33398e-32	C02 - CD4+ Th : GPR183 ADT-CD49fhi	CD27
UBE2S	7.05046e-37	0.402964	0.924	0.759	3.18603e-32	C02 - CD4+ Th : GPR183 ADT-CD49fhi	UBE2S
XCL1.1	8.572e-37	-1.50258	0.027	0.174	3.8736e-32	C02 - CD4+ Th : GPR183 ADT-CD49fhi	XCL1
RPS20.1	9.95921e-37	0.404467	0.962	0.879	4.50047e-32	C02 - CD4+ Th : GPR183 ADT-CD49fhi	RPS20
CYBA	1.39279e-36	-0.45107	0.87	0.872	6.29386e-32	C02 - CD4+ Th : GPR183 ADT-CD49fhi	CYBA
CD63.1	1.51735e-36	-0.764591	0.381	0.521	6.85677e-32	C02 - CD4+ Th : GPR183 ADT-CD49fhi	CD63
ZEB2.1	2.76846e-36	-0.886697	0.106	0.298	1.25104e-31	C02 - CD4+ Th : GPR183 ADT-CD49fhi	ZEB2
NPM1	3.35174e-36	0.406408	0.955	0.86	1.51462e-31	C02 - CD4+ Th : GPR183 ADT-CD49fhi	NPM1
EVL	3.75844e-36	-0.590912	0.636	0.723	1.6984e-31	C02 - CD4+ Th : GPR183 ADT-CD49fhi	EVL
TNFAIP3.1	5.37634e-36	0.496429	0.958	0.845	2.42952e-31	C02 - CD4+ Th : GPR183 ADT-CD49fhi	TNFAIP3
CALM1	7.05325e-36	0.365641	0.976	0.917	3.18729e-31	C02 - CD4+ Th : GPR183 ADT-CD49fhi	CALM1
RPL37.1	1.45595e-35	0.343564	0.995	0.971	6.57927e-31	C02 - CD4+ Th : GPR183 ADT-CD49fhi	RPL37
MYL6	2.10683e-35	-0.392047	0.913	0.874	9.52056e-31	C02 - CD4+ Th : GPR183 ADT-CD49fhi	MYL6
RPS5.1	2.17572e-35	0.36088	0.973	0.936	9.83184e-31	C02 - CD4+ Th : GPR183 ADT-CD49fhi	RPS5
SUMO2	2.36753e-35	-0.435104	0.702	0.73	1.06986e-30	C02 - CD4+ Th : GPR183 ADT-CD49fhi	SUMO2
GZMH.1	3.62864e-35	-1.02382	0.032	0.177	1.63975e-30	C02 - CD4+ Th : GPR183 ADT-CD49fhi	GZMH
PTMS.1	5.75519e-35	-0.768121	0.085	0.254	2.60071e-30	C02 - CD4+ Th : GPR183 ADT-CD49fhi	PTMS
MIR4435-2HG.1	1.09945e-34	-0.629942	0.052	0.215	4.9683e-30	C02 - CD4+ Th : GPR183 ADT-CD49fhi	MIR4435-2HG
EEF1B2.1	1.31026e-34	0.40932	0.96	0.886	5.92091e-30	C02 - CD4+ Th : GPR183 ADT-CD49fhi	EEF1B2
COTL1	1.36802e-34	-0.551646	0.65	0.653	6.18195e-30	C02 - CD4+ Th : GPR183 ADT-CD49fhi	COTL1
ARPC2	3.00695e-34	-0.413861	0.813	0.806	1.35881e-29	C02 - CD4+ Th : GPR183 ADT-CD49fhi	ARPC2
HLA-DQA1.1	8.61291e-34	-0.938928	0.138	0.291	3.89209e-29	C02 - CD4+ Th : GPR183 ADT-CD49fhi	HLA-DQA1
TUBB2A	1.27002e-33	0.567252	0.462	0.257	5.73908e-29	C02 - CD4+ Th : GPR183 ADT-CD49fhi	TUBB2A
RPL23A.1	1.44207e-33	0.279322	0.997	0.974	6.51656e-29	C02 - CD4+ Th : GPR183 ADT-CD49fhi	RPL23A
COX8A	1.86229e-33	-0.535098	0.519	0.604	8.41552e-29	C02 - CD4+ Th : GPR183 ADT-CD49fhi	COX8A
RPS2.1	2.34309e-33	0.297003	0.999	0.986	1.05882e-28	C02 - CD4+ Th : GPR183 ADT-CD49fhi	RPS2
RPL36.1	3.65501e-33	0.319614	0.991	0.947	1.65166e-28	C02 - CD4+ Th : GPR183 ADT-CD49fhi	RPL36
RPL18A.1	3.66983e-33	0.310994	0.995	0.977	1.65836e-28	C02 - CD4+ Th : GPR183 ADT-CD49fhi	RPL18A
SERP1	4.98838e-33	0.413045	0.835	0.657	2.2542e-28	C02 - CD4+ Th : GPR183 ADT-CD49fhi	SERP1
CTSC.1	5.88602e-33	-0.778844	0.324	0.474	2.65984e-28	C02 - CD4+ Th : GPR183 ADT-CD49fhi	CTSC
DNAJA1.1	1.09597e-32	0.424391	0.981	0.889	4.95256e-28	C02 - CD4+ Th : GPR183 ADT-CD49fhi	DNAJA1
AQP3.1	1.28567e-32	0.473222	0.427	0.221	5.80979e-28	C02 - CD4+ Th : GPR183 ADT-CD49fhi	AQP3
RPL12.1	1.68588e-32	0.328252	0.994	0.97	7.61833e-28	C02 - CD4+ Th : GPR183 ADT-CD49fhi	RPL12
UBL5	2.40551e-32	-0.409932	0.677	0.717	1.08702e-27	C02 - CD4+ Th : GPR183 ADT-CD49fhi	UBL5
RPL18.1	2.61724e-32	0.301457	0.994	0.967	1.1827e-27	C02 - CD4+ Th : GPR183 ADT-CD49fhi	RPL18
LY6E	2.76415e-32	-0.710307	0.465	0.587	1.24909e-27	C02 - CD4+ Th : GPR183 ADT-CD49fhi	LY6E
ODC1	3.12067e-32	0.510541	0.715	0.51	1.4102e-27	C02 - CD4+ Th : GPR183 ADT-CD49fhi	ODC1
CD247	4.85367e-32	-0.675888	0.357	0.52	2.19333e-27	C02 - CD4+ Th : GPR183 ADT-CD49fhi	CD247
PSME2	5.83221e-32	-0.528592	0.543	0.611	2.63552e-27	C02 - CD4+ Th : GPR183 ADT-CD49fhi	PSME2
RPL10A.1	7.11447e-32	0.331663	0.987	0.951	3.21496e-27	C02 - CD4+ Th : GPR183 ADT-CD49fhi	RPL10A
OAZ1	7.73005e-32	-0.325034	0.949	0.914	3.49313e-27	C02 - CD4+ Th : GPR183 ADT-CD49fhi	OAZ1
RPS29.1	1.80866e-31	0.290171	0.99	0.969	8.17313e-27	C02 - CD4+ Th : GPR183 ADT-CD49fhi	RPS29
ACTG1	2.08896e-31	-0.465062	0.955	0.936	9.4398e-27	C02 - CD4+ Th : GPR183 ADT-CD49fhi	ACTG1
SH3BGRL3.1	2.72278e-31	-0.427997	0.933	0.902	1.2304e-26	C02 - CD4+ Th : GPR183 ADT-CD49fhi	SH3BGRL3
TRDC.1	4.01477e-31	-1.0621	0.009	0.118	1.81424e-26	C02 - CD4+ Th : GPR183 ADT-CD49fhi	TRDC
RPL6.1	4.79677e-31	0.289099	0.991	0.963	2.16761e-26	C02 - CD4+ Th : GPR183 ADT-CD49fhi	RPL6
BST2.1	4.90398e-31	-0.66464	0.326	0.473	2.21606e-26	C02 - CD4+ Th : GPR183 ADT-CD49fhi	BST2
DNAJB9	5.44161e-31	0.46926	0.585	0.37	2.45901e-26	C02 - CD4+ Th : GPR183 ADT-CD49fhi	DNAJB9
EIF4A3.1	7.0877e-31	0.372205	0.793	0.588	3.20286e-26	C02 - CD4+ Th : GPR183 ADT-CD49fhi	EIF4A3
CFL1	9.15089e-31	-0.293983	0.949	0.91	4.1352e-26	C02 - CD4+ Th : GPR183 ADT-CD49fhi	CFL1
SOD2	1.20679e-30	0.57858	0.529	0.326	5.45337e-26	C02 - CD4+ Th : GPR183 ADT-CD49fhi	SOD2
ITM2C.1	1.25224e-30	-0.767827	0.095	0.241	5.65874e-26	C02 - CD4+ Th : GPR183 ADT-CD49fhi	ITM2C
KLF3	1.41673e-30	0.424036	0.295	0.126	6.40206e-26	C02 - CD4+ Th : GPR183 ADT-CD49fhi	KLF3
RPS21.1	1.75601e-30	0.304255	0.991	0.954	7.93525e-26	C02 - CD4+ Th : GPR183 ADT-CD49fhi	RPS21
RPL21.1	1.77425e-30	0.350026	0.991	0.967	8.01766e-26	C02 - CD4+ Th : GPR183 ADT-CD49fhi	RPL21
RPL22.1	1.87093e-30	0.35854	0.98	0.921	8.45455e-26	C02 - CD4+ Th : GPR183 ADT-CD49fhi	RPL22
PNP	2.15988e-30	0.494547	0.52	0.311	9.76028e-26	C02 - CD4+ Th : GPR183 ADT-CD49fhi	PNP
RPS28.1	3.42502e-30	0.292428	0.995	0.974	1.54773e-25	C02 - CD4+ Th : GPR183 ADT-CD49fhi	RPS28
BATF.1	4.45074e-30	-1.03812	0.203	0.366	2.01125e-25	C02 - CD4+ Th : GPR183 ADT-CD49fhi	BATF
HLA-DQA2.1	6.26623e-30	-0.451657	0.009	0.116	2.83165e-25	C02 - CD4+ Th : GPR183 ADT-CD49fhi	HLA-DQA2
S100A10.1	1.15546e-29	0.492403	0.893	0.764	5.22142e-25	C02 - CD4+ Th : GPR183 ADT-CD49fhi	S100A10
RHOA	1.18127e-29	-0.439392	0.606	0.649	5.33805e-25	C02 - CD4+ Th : GPR183 ADT-CD49fhi	RHOA
CD44	1.39445e-29	0.399042	0.915	0.8	6.30139e-25	C02 - CD4+ Th : GPR183 ADT-CD49fhi	CD44
RPL4.1	1.5975e-29	0.34992	0.958	0.881	7.21894e-25	C02 - CD4+ Th : GPR183 ADT-CD49fhi	RPL4
ATP1A1	1.60649e-29	0.423041	0.669	0.462	7.25957e-25	C02 - CD4+ Th : GPR183 ADT-CD49fhi	ATP1A1
PTMA	1.72749e-29	0.274106	0.999	0.987	7.80635e-25	C02 - CD4+ Th : GPR183 ADT-CD49fhi	PTMA
LSP1	3.30235e-29	-0.518	0.485	0.576	1.4923e-24	C02 - CD4+ Th : GPR183 ADT-CD49fhi	LSP1
RPL38.1	4.66763e-29	0.335248	0.972	0.929	2.10926e-24	C02 - CD4+ Th : GPR183 ADT-CD49fhi	RPL38
RPLP1.1	5.47373e-28	0.256834	1	0.992	2.47352e-23	C02 - CD4+ Th : GPR183 ADT-CD49fhi	RPLP1
PSMB8	5.73382e-28	-0.558961	0.321	0.467	2.59106e-23	C02 - CD4+ Th : GPR183 ADT-CD49fhi	PSMB8
CALM3.1	6.04202e-28	-0.578438	0.317	0.449	2.73033e-23	C02 - CD4+ Th : GPR183 ADT-CD49fhi	CALM3
GLTSCR2	2.87098e-27	0.527749	0.549	0.364	1.29737e-22	C02 - CD4+ Th : GPR183 ADT-CD49fhi	GLTSCR2
HLA-A.1	2.91051e-27	-0.360051	0.992	0.988	1.31523e-22	C02 - CD4+ Th : GPR183 ADT-CD49fhi	HLA-A
2007-09-01	2.9825e-27	-0.453893	0.587	0.655	1.34776e-22	C02 - CD4+ Th : GPR183 ADT-CD49fhi	2007-09-01
RPS10	3.02736e-27	0.326134	0.958	0.891	1.36803e-22	C02 - CD4+ Th : GPR183 ADT-CD49fhi	RPS10
LAG3.1	3.69175e-27	-0.649036	0.059	0.193	1.66827e-22	C02 - CD4+ Th : GPR183 ADT-CD49fhi	LAG3
RNF213.1	5.50714e-27	-0.64354	0.504	0.607	2.48862e-22	C02 - CD4+ Th : GPR183 ADT-CD49fhi	RNF213
GZMK.1	6.11255e-27	-1.09047	0.289	0.398	2.7622e-22	C02 - CD4+ Th : GPR183 ADT-CD49fhi	GZMK
FAM173A.1	1.03327e-26	-0.436926	0.058	0.2	4.66926e-22	C02 - CD4+ Th : GPR183 ADT-CD49fhi	FAM173A
FOXP3.1	1.07353e-26	-0.47815	0.01	0.11	4.85118e-22	C02 - CD4+ Th : GPR183 ADT-CD49fhi	FOXP3
ZBTB10	1.13234e-26	0.468437	0.289	0.132	5.11695e-22	C02 - CD4+ Th : GPR183 ADT-CD49fhi	ZBTB10
HMGB1	1.7487e-26	-0.489264	0.793	0.82	7.90219e-22	C02 - CD4+ Th : GPR183 ADT-CD49fhi	HMGB1
SEMA4A	2.33419e-26	0.463229	0.245	0.103	1.0548e-21	C02 - CD4+ Th : GPR183 ADT-CD49fhi	SEMA4A
TSC22D2	2.52149e-26	0.419435	0.47	0.277	1.13944e-21	C02 - CD4+ Th : GPR183 ADT-CD49fhi	TSC22D2
RPLP0.1	2.72556e-26	0.316014	0.967	0.893	1.23165e-21	C02 - CD4+ Th : GPR183 ADT-CD49fhi	RPLP0
RPL24.1	4.37461e-26	0.263114	0.987	0.962	1.97684e-21	C02 - CD4+ Th : GPR183 ADT-CD49fhi	RPL24
CSRNP1	7.57355e-26	0.34187	0.682	0.482	3.42241e-21	C02 - CD4+ Th : GPR183 ADT-CD49fhi	CSRNP1
SARAF.1	1.25078e-25	0.35061	0.951	0.866	5.65213e-21	C02 - CD4+ Th : GPR183 ADT-CD49fhi	SARAF
FKBP1A	1.84406e-25	-0.549012	0.287	0.414	8.33312e-21	C02 - CD4+ Th : GPR183 ADT-CD49fhi	FKBP1A
ANK3	2.54696e-25	0.311336	0.217	0.086	1.15095e-20	C02 - CD4+ Th : GPR183 ADT-CD49fhi	ANK3
RPS26	3.06356e-25	-0.29899	0.848	0.798	1.38439e-20	C02 - CD4+ Th : GPR183 ADT-CD49fhi	RPS26
COPE	3.27859e-25	-0.496342	0.347	0.497	1.48156e-20	C02 - CD4+ Th : GPR183 ADT-CD49fhi	COPE
AMD1	3.37624e-25	0.326268	0.821	0.648	1.52569e-20	C02 - CD4+ Th : GPR183 ADT-CD49fhi	AMD1
APOBEC3C.1	4.48214e-25	-0.517952	0.097	0.238	2.02543e-20	C02 - CD4+ Th : GPR183 ADT-CD49fhi	APOBEC3C
RPSA.1	4.92377e-25	0.29761	0.985	0.947	2.225e-20	C02 - CD4+ Th : GPR183 ADT-CD49fhi	RPSA
SRP14	6.84018e-25	-0.345692	0.801	0.807	3.09101e-20	C02 - CD4+ Th : GPR183 ADT-CD49fhi	SRP14
AOAH.1	7.13754e-25	-0.377412	0.015	0.113	3.22538e-20	C02 - CD4+ Th : GPR183 ADT-CD49fhi	AOAH
YBX3.1	1.38484e-24	-0.567369	0.027	0.138	6.25797e-20	C02 - CD4+ Th : GPR183 ADT-CD49fhi	YBX3
CYTOR	1.55196e-24	-0.620221	0.074	0.216	7.01313e-20	C02 - CD4+ Th : GPR183 ADT-CD49fhi	CYTOR
TYROBP.1	1.63689e-24	-0.88216	0.027	0.125	7.39695e-20	C02 - CD4+ Th : GPR183 ADT-CD49fhi	TYROBP
ATP5F1E.1	1.83121e-24	-0.677888	0.324	0.419	8.27508e-20	C02 - CD4+ Th : GPR183 ADT-CD49fhi	ATP5F1E
IRS2	2.35411e-24	0.436612	0.427	0.248	1.0638e-19	C02 - CD4+ Th : GPR183 ADT-CD49fhi	IRS2
IL23A	6.15606e-24	0.371094	0.21	0.082	2.78186e-19	C02 - CD4+ Th : GPR183 ADT-CD49fhi	IL23A
IFITM2	8.7019e-24	-0.487701	0.606	0.644	3.9323e-19	C02 - CD4+ Th : GPR183 ADT-CD49fhi	IFITM2
FXYD5.1	9.04802e-24	0.331113	0.84	0.681	4.08871e-19	C02 - CD4+ Th : GPR183 ADT-CD49fhi	FXYD5
ZFP36L2	1.64953e-23	0.419257	0.968	0.894	7.45405e-19	C02 - CD4+ Th : GPR183 ADT-CD49fhi	ZFP36L2
IL2RB.1	1.79881e-23	-0.562949	0.154	0.303	8.12863e-19	C02 - CD4+ Th : GPR183 ADT-CD49fhi	IL2RB
ACTN4	2.25476e-23	-0.532996	0.27	0.426	1.01891e-18	C02 - CD4+ Th : GPR183 ADT-CD49fhi	ACTN4
NDUFA4	3.278e-23	-0.308488	0.71	0.707	1.4813e-18	C02 - CD4+ Th : GPR183 ADT-CD49fhi	NDUFA4
GTF2B	4.94028e-23	0.383489	0.698	0.519	2.23246e-18	C02 - CD4+ Th : GPR183 ADT-CD49fhi	GTF2B
YIPF5.1	6.17937e-23	0.428492	0.37	0.217	2.7924e-18	C02 - CD4+ Th : GPR183 ADT-CD49fhi	YIPF5
PRNP	6.25521e-23	0.420593	0.54	0.357	2.82667e-18	C02 - CD4+ Th : GPR183 ADT-CD49fhi	PRNP
NEU1.1	1.11848e-22	0.397083	0.691	0.508	5.0543e-18	C02 - CD4+ Th : GPR183 ADT-CD49fhi	NEU1
HLA-B	1.16303e-22	-0.274547	1	0.992	5.25563e-18	C02 - CD4+ Th : GPR183 ADT-CD49fhi	HLA-B
IDS	1.4392e-22	0.375676	0.782	0.625	6.5036e-18	C02 - CD4+ Th : GPR183 ADT-CD49fhi	IDS
CXCR4	1.62378e-22	0.350629	0.957	0.884	7.33768e-18	C02 - CD4+ Th : GPR183 ADT-CD49fhi	CXCR4
NANS	2.17615e-22	0.422645	0.37	0.214	9.8338e-18	C02 - CD4+ Th : GPR183 ADT-CD49fhi	NANS
NCR3.1	2.31542e-22	-0.348653	0.018	0.112	1.04631e-17	C02 - CD4+ Th : GPR183 ADT-CD49fhi	NCR3
RPL29.1	5.07075e-22	0.256465	0.986	0.963	2.29142e-17	C02 - CD4+ Th : GPR183 ADT-CD49fhi	RPL29
GLIPR1.1	5.56771e-22	0.447803	0.521	0.347	2.51599e-17	C02 - CD4+ Th : GPR183 ADT-CD49fhi	GLIPR1
SOCS3	5.9487e-22	0.40623	0.638	0.455	2.68816e-17	C02 - CD4+ Th : GPR183 ADT-CD49fhi	SOCS3
ARL4A	6.6935e-22	0.409597	0.553	0.375	3.02472e-17	C02 - CD4+ Th : GPR183 ADT-CD49fhi	ARL4A
RCAN3.1	1.12337e-21	0.299337	0.514	0.334	5.0764e-17	C02 - CD4+ Th : GPR183 ADT-CD49fhi	RCAN3
RPL27.1	1.18873e-21	0.273289	0.98	0.929	5.37176e-17	C02 - CD4+ Th : GPR183 ADT-CD49fhi	RPL27
WDR83OS	1.39503e-21	-0.48284	0.297	0.446	6.30398e-17	C02 - CD4+ Th : GPR183 ADT-CD49fhi	WDR83OS
SRGAP3.1	1.83266e-21	-0.360762	0.018	0.11	8.28162e-17	C02 - CD4+ Th : GPR183 ADT-CD49fhi	SRGAP3
CCDC109B	1.86529e-21	0.309892	0.282	0.14	8.42905e-17	C02 - CD4+ Th : GPR183 ADT-CD49fhi	CCDC109B
CMC1.1	2.00875e-21	-0.668026	0.116	0.251	9.07733e-17	C02 - CD4+ Th : GPR183 ADT-CD49fhi	CMC1
SELK	2.03396e-21	0.529168	0.537	0.361	9.19125e-17	C02 - CD4+ Th : GPR183 ADT-CD49fhi	SELK
PTPN22.1	2.32214e-21	-0.580669	0.318	0.458	1.04935e-16	C02 - CD4+ Th : GPR183 ADT-CD49fhi	PTPN22
PNRC1	2.39118e-21	0.328057	0.91	0.804	1.08055e-16	C02 - CD4+ Th : GPR183 ADT-CD49fhi	PNRC1
RPL13A.1	3.24891e-21	0.25069	0.992	0.967	1.46815e-16	C02 - CD4+ Th : GPR183 ADT-CD49fhi	RPL13A
XBP1	3.79892e-21	0.372934	0.592	0.415	1.71669e-16	C02 - CD4+ Th : GPR183 ADT-CD49fhi	XBP1
PRELID1	4.32713e-21	-0.470367	0.328	0.446	1.95539e-16	C02 - CD4+ Th : GPR183 ADT-CD49fhi	PRELID1
HSP90AB1.1	4.55041e-21	0.319341	0.98	0.908	2.05629e-16	C02 - CD4+ Th : GPR183 ADT-CD49fhi	HSP90AB1
HMGN1	4.56528e-21	-0.338164	0.652	0.66	2.063e-16	C02 - CD4+ Th : GPR183 ADT-CD49fhi	HMGN1
RPL31.1	4.79537e-21	0.30556	0.898	0.786	2.16698e-16	C02 - CD4+ Th : GPR183 ADT-CD49fhi	RPL31
HLA-DQB1.1	5.106e-21	-0.593105	0.182	0.327	2.30735e-16	C02 - CD4+ Th : GPR183 ADT-CD49fhi	HLA-DQB1
CTSL.1	5.32601e-21	0.337388	0.193	0.077	2.40677e-16	C02 - CD4+ Th : GPR183 ADT-CD49fhi	CTSL
YWHAB	5.73959e-21	-0.343861	0.616	0.632	2.59366e-16	C02 - CD4+ Th : GPR183 ADT-CD49fhi	YWHAB
ARID5A	7.30388e-21	0.384539	0.544	0.37	3.30055e-16	C02 - CD4+ Th : GPR183 ADT-CD49fhi	ARID5A
CTSD.1	8.57848e-21	-0.541191	0.316	0.455	3.87653e-16	C02 - CD4+ Th : GPR183 ADT-CD49fhi	CTSD
EMP1	1.04512e-20	0.273453	0.122	0.036	4.72279e-16	C02 - CD4+ Th : GPR183 ADT-CD49fhi	EMP1
UQCR10	1.05459e-20	-0.465769	0.348	0.469	4.76557e-16	C02 - CD4+ Th : GPR183 ADT-CD49fhi	UQCR10
TOMM7.1	1.1864e-20	0.255371	0.943	0.848	5.36122e-16	C02 - CD4+ Th : GPR183 ADT-CD49fhi	TOMM7
ATP6V0E1	1.24954e-20	-0.37561	0.587	0.629	5.64655e-16	C02 - CD4+ Th : GPR183 ADT-CD49fhi	ATP6V0E1
DNTTIP2	1.3411e-20	0.39006	0.524	0.354	6.06031e-16	C02 - CD4+ Th : GPR183 ADT-CD49fhi	DNTTIP2
IFNG.1	1.47201e-20	-1.1228	0.184	0.332	6.65187e-16	C02 - CD4+ Th : GPR183 ADT-CD49fhi	IFNG
CCDC64	1.70356e-20	0.399251	0.403	0.239	7.69821e-16	C02 - CD4+ Th : GPR183 ADT-CD49fhi	CCDC64
CYCS	1.82144e-20	0.374893	0.812	0.665	8.23088e-16	C02 - CD4+ Th : GPR183 ADT-CD49fhi	CYCS
CXCR6	2.5787e-20	-0.534027	0.047	0.156	1.16529e-15	C02 - CD4+ Th : GPR183 ADT-CD49fhi	CXCR6
RPS9.1	2.93235e-20	0.260956	0.99	0.966	1.3251e-15	C02 - CD4+ Th : GPR183 ADT-CD49fhi	RPS9
NAF1	3.21066e-20	0.395316	0.29	0.153	1.45087e-15	C02 - CD4+ Th : GPR183 ADT-CD49fhi	NAF1
ITGB2	3.62064e-20	-0.470346	0.451	0.534	1.63613e-15	C02 - CD4+ Th : GPR183 ADT-CD49fhi	ITGB2
TRGC2.1	3.77029e-20	-0.69248	0.104	0.215	1.70375e-15	C02 - CD4+ Th : GPR183 ADT-CD49fhi	TRGC2
XIST	3.96514e-20	-0.505575	0.712	0.744	1.79181e-15	C02 - CD4+ Th : GPR183 ADT-CD49fhi	XIST
CCL3.1	4.0717e-20	-1.89952	0.059	0.141	1.83996e-15	C02 - CD4+ Th : GPR183 ADT-CD49fhi	CCL3
ARPC1B	4.24676e-20	-0.342533	0.597	0.604	1.91907e-15	C02 - CD4+ Th : GPR183 ADT-CD49fhi	ARPC1B
SERTAD1	6.40495e-20	0.289978	0.769	0.605	2.89433e-15	C02 - CD4+ Th : GPR183 ADT-CD49fhi	SERTAD1
TTN.1	7.34382e-20	-0.566785	0.024	0.116	3.3186e-15	C02 - CD4+ Th : GPR183 ADT-CD49fhi	TTN
TYMP.1	7.48322e-20	-0.645914	0.314	0.43	3.38159e-15	C02 - CD4+ Th : GPR183 ADT-CD49fhi	TYMP
PSME1	8.00792e-20	-0.340412	0.672	0.71	3.6187e-15	C02 - CD4+ Th : GPR183 ADT-CD49fhi	PSME1
LGALS1	9.31165e-20	-0.803274	0.395	0.465	4.20784e-15	C02 - CD4+ Th : GPR183 ADT-CD49fhi	LGALS1
VAV3.1	9.44918e-20	-0.294067	0.023	0.114	4.26999e-15	C02 - CD4+ Th : GPR183 ADT-CD49fhi	VAV3
ATP8A1.1	1.07519e-19	-0.339367	0.028	0.122	4.85868e-15	C02 - CD4+ Th : GPR183 ADT-CD49fhi	ATP8A1
NFATC1	1.58898e-19	0.332326	0.255	0.125	7.18042e-15	C02 - CD4+ Th : GPR183 ADT-CD49fhi	NFATC1
TRAC	1.61372e-19	-0.342824	0.845	0.802	7.29223e-15	C02 - CD4+ Th : GPR183 ADT-CD49fhi	TRAC
CALM2	1.62266e-19	0.318753	0.881	0.773	7.33266e-15	C02 - CD4+ Th : GPR183 ADT-CD49fhi	CALM2
ELF1	2.90356e-19	0.331399	0.824	0.683	1.31209e-14	C02 - CD4+ Th : GPR183 ADT-CD49fhi	ELF1
COX6C	4.53736e-19	-0.340176	0.616	0.649	2.05039e-14	C02 - CD4+ Th : GPR183 ADT-CD49fhi	COX6C
TPM3	5.02561e-19	-0.31839	0.621	0.649	2.27102e-14	C02 - CD4+ Th : GPR183 ADT-CD49fhi	TPM3
JMJD1C	5.81462e-19	0.398438	0.63	0.473	2.62757e-14	C02 - CD4+ Th : GPR183 ADT-CD49fhi	JMJD1C
ARPC4	6.0577e-19	-0.43446	0.288	0.414	2.73741e-14	C02 - CD4+ Th : GPR183 ADT-CD49fhi	ARPC4
MT2A.1	6.40441e-19	-0.651194	0.432	0.533	2.89409e-14	C02 - CD4+ Th : GPR183 ADT-CD49fhi	MT2A
GNG5	6.65756e-19	-0.420764	0.362	0.456	3.00848e-14	C02 - CD4+ Th : GPR183 ADT-CD49fhi	GNG5
SDCBP	8.37815e-19	0.369331	0.768	0.618	3.786e-14	C02 - CD4+ Th : GPR183 ADT-CD49fhi	SDCBP
TSPO	1.17117e-18	-0.435531	0.443	0.553	5.2924e-14	C02 - CD4+ Th : GPR183 ADT-CD49fhi	TSPO
PLAC8	1.20584e-18	0.251916	0.22	0.105	5.44905e-14	C02 - CD4+ Th : GPR183 ADT-CD49fhi	PLAC8
PSMB1	1.23727e-18	-0.39275	0.415	0.507	5.59108e-14	C02 - CD4+ Th : GPR183 ADT-CD49fhi	PSMB1
TNFRSF4.1	1.2598e-18	-1.02193	0.169	0.246	5.69291e-14	C02 - CD4+ Th : GPR183 ADT-CD49fhi	TNFRSF4
CHD2	1.2944e-18	0.2858	0.648	0.479	5.84928e-14	C02 - CD4+ Th : GPR183 ADT-CD49fhi	CHD2
PSTPIP1	1.78688e-18	-0.471226	0.232	0.37	8.07474e-14	C02 - CD4+ Th : GPR183 ADT-CD49fhi	PSTPIP1
SC5D	1.8843e-18	0.366431	0.356	0.208	8.51498e-14	C02 - CD4+ Th : GPR183 ADT-CD49fhi	SC5D
TRAPPC1	1.95139e-18	-0.43668	0.282	0.401	8.81812e-14	C02 - CD4+ Th : GPR183 ADT-CD49fhi	TRAPPC1
PSMA7	2.01239e-18	-0.281109	0.658	0.664	9.09379e-14	C02 - CD4+ Th : GPR183 ADT-CD49fhi	PSMA7
LCP1	2.02611e-18	-0.421653	0.519	0.588	9.15578e-14	C02 - CD4+ Th : GPR183 ADT-CD49fhi	LCP1
NDUFS6	2.25428e-18	-0.417322	0.26	0.377	1.01869e-13	C02 - CD4+ Th : GPR183 ADT-CD49fhi	NDUFS6
NASP	2.68538e-18	0.258779	0.729	0.566	1.2135e-13	C02 - CD4+ Th : GPR183 ADT-CD49fhi	NASP
S100A6	2.72898e-18	-0.286991	0.865	0.838	1.2332e-13	C02 - CD4+ Th : GPR183 ADT-CD49fhi	S100A6
MATK.1	2.79433e-18	-0.479836	0.081	0.187	1.26273e-13	C02 - CD4+ Th : GPR183 ADT-CD49fhi	MATK
TUBA1A	2.89426e-18	0.285344	0.813	0.667	1.30789e-13	C02 - CD4+ Th : GPR183 ADT-CD49fhi	TUBA1A
RORA.1	2.9088e-18	0.331007	0.672	0.507	1.31446e-13	C02 - CD4+ Th : GPR183 ADT-CD49fhi	RORA
GEM.1	2.91274e-18	-0.70398	0.061	0.166	1.31624e-13	C02 - CD4+ Th : GPR183 ADT-CD49fhi	GEM
SKIL	3.25829e-18	0.341208	0.495	0.332	1.47239e-13	C02 - CD4+ Th : GPR183 ADT-CD49fhi	SKIL
HOPX.1	3.85061e-18	-0.562177	0.242	0.265	1.74005e-13	C02 - CD4+ Th : GPR183 ADT-CD49fhi	HOPX
DYNLRB1	4.15353e-18	-0.439095	0.288	0.42	1.87694e-13	C02 - CD4+ Th : GPR183 ADT-CD49fhi	DYNLRB1
TXNIP	4.39915e-18	-0.742356	0.501	0.629	1.98793e-13	C02 - CD4+ Th : GPR183 ADT-CD49fhi	TXNIP
SH2D1A.1	4.56414e-18	-0.498984	0.184	0.309	2.06249e-13	C02 - CD4+ Th : GPR183 ADT-CD49fhi	SH2D1A
ATP5MC3	4.83596e-18	-0.458539	0.138	0.235	2.18532e-13	C02 - CD4+ Th : GPR183 ADT-CD49fhi	ATP5MC3
LDHB.1	5.54049e-18	0.315426	0.732	0.585	2.50369e-13	C02 - CD4+ Th : GPR183 ADT-CD49fhi	LDHB
ATP2B1.1	5.69638e-18	0.376368	0.518	0.356	2.57414e-13	C02 - CD4+ Th : GPR183 ADT-CD49fhi	ATP2B1
HNRNPA0	5.83742e-18	0.300159	0.694	0.533	2.63787e-13	C02 - CD4+ Th : GPR183 ADT-CD49fhi	HNRNPA0
CD2	6.20037e-18	-0.265685	0.866	0.817	2.80188e-13	C02 - CD4+ Th : GPR183 ADT-CD49fhi	CD2
PPDPF	6.52059e-18	-0.310035	0.721	0.734	2.94659e-13	C02 - CD4+ Th : GPR183 ADT-CD49fhi	PPDPF
CAP1	6.70142e-18	-0.448779	0.335	0.44	3.0283e-13	C02 - CD4+ Th : GPR183 ADT-CD49fhi	CAP1
RILPL2.1	6.9837e-18	0.413324	0.516	0.361	3.15587e-13	C02 - CD4+ Th : GPR183 ADT-CD49fhi	RILPL2
C9orf16	7.05773e-18	-0.416696	0.428	0.508	3.18932e-13	C02 - CD4+ Th : GPR183 ADT-CD49fhi	C9orf16
DUSP2.1	9.52334e-18	-0.404997	0.824	0.789	4.3035e-13	C02 - CD4+ Th : GPR183 ADT-CD49fhi	DUSP2
ELOB	9.53538e-18	-0.506663	0.216	0.323	4.30894e-13	C02 - CD4+ Th : GPR183 ADT-CD49fhi	ELOB
INSIG1	1.16799e-17	0.365565	0.378	0.229	5.27803e-13	C02 - CD4+ Th : GPR183 ADT-CD49fhi	INSIG1
DDX3X	1.1937e-17	0.276809	0.924	0.83	5.39419e-13	C02 - CD4+ Th : GPR183 ADT-CD49fhi	DDX3X
AKNA.1	1.32279e-17	-0.512987	0.222	0.351	5.97755e-13	C02 - CD4+ Th : GPR183 ADT-CD49fhi	AKNA
DRAP1	1.50891e-17	-0.434201	0.455	0.547	6.81862e-13	C02 - CD4+ Th : GPR183 ADT-CD49fhi	DRAP1
SEC11A	1.57917e-17	-0.422547	0.361	0.458	7.13611e-13	C02 - CD4+ Th : GPR183 ADT-CD49fhi	SEC11A
ENO1	2.67813e-17	-0.345369	0.571	0.573	1.21022e-12	C02 - CD4+ Th : GPR183 ADT-CD49fhi	ENO1
LCK	3.3451e-17	-0.359783	0.528	0.575	1.51162e-12	C02 - CD4+ Th : GPR183 ADT-CD49fhi	LCK
PKM.1	3.4169e-17	-0.55172	0.359	0.438	1.54406e-12	C02 - CD4+ Th : GPR183 ADT-CD49fhi	PKM
IFI27L2	3.63749e-17	-0.418229	0.17	0.296	1.64375e-12	C02 - CD4+ Th : GPR183 ADT-CD49fhi	IFI27L2
ABI3	3.99822e-17	-0.256943	0.023	0.104	1.80676e-12	C02 - CD4+ Th : GPR183 ADT-CD49fhi	ABI3
LAIR2.1	4.4365e-17	-0.413865	0.027	0.107	2.00481e-12	C02 - CD4+ Th : GPR183 ADT-CD49fhi	LAIR2
CFLAR.1	4.58263e-17	-0.477981	0.38	0.492	2.07084e-12	C02 - CD4+ Th : GPR183 ADT-CD49fhi	CFLAR
AP3M2.1	4.73657e-17	0.301717	0.335	0.195	2.14041e-12	C02 - CD4+ Th : GPR183 ADT-CD49fhi	AP3M2
MIR22HG	4.85426e-17	0.343601	0.268	0.145	2.19359e-12	C02 - CD4+ Th : GPR183 ADT-CD49fhi	MIR22HG
RPL7.1	4.99114e-17	0.274796	0.946	0.879	2.25544e-12	C02 - CD4+ Th : GPR183 ADT-CD49fhi	RPL7
ELL2	5.05929e-17	0.356072	0.371	0.229	2.28624e-12	C02 - CD4+ Th : GPR183 ADT-CD49fhi	ELL2
ACP5.1	5.93878e-17	-0.329272	0.048	0.146	2.68368e-12	C02 - CD4+ Th : GPR183 ADT-CD49fhi	ACP5
EEF2.1	5.94497e-17	0.25667	0.879	0.766	2.68647e-12	C02 - CD4+ Th : GPR183 ADT-CD49fhi	EEF2
MGAT4A.1	6.19228e-17	0.290974	0.369	0.224	2.79823e-12	C02 - CD4+ Th : GPR183 ADT-CD49fhi	MGAT4A
DBI	6.73937e-17	-0.397021	0.433	0.511	3.04545e-12	C02 - CD4+ Th : GPR183 ADT-CD49fhi	DBI
NEDD8	6.99266e-17	-0.349538	0.439	0.513	3.15991e-12	C02 - CD4+ Th : GPR183 ADT-CD49fhi	NEDD8
BRK1	7.75907e-17	-0.398584	0.365	0.463	3.50625e-12	C02 - CD4+ Th : GPR183 ADT-CD49fhi	BRK1
ANXA6	7.84132e-17	-0.429424	0.253	0.378	3.54341e-12	C02 - CD4+ Th : GPR183 ADT-CD49fhi	ANXA6
EIF3E.1	8.88551e-17	0.311525	0.773	0.637	4.01527e-12	C02 - CD4+ Th : GPR183 ADT-CD49fhi	EIF3E
CHST12.1	9.08031e-17	-0.414826	0.096	0.214	4.1033e-12	C02 - CD4+ Th : GPR183 ADT-CD49fhi	CHST12
GZMM	1.31736e-16	-0.43338	0.356	0.422	5.953e-12	C02 - CD4+ Th : GPR183 ADT-CD49fhi	GZMM
PDE4B	1.33662e-16	0.352	0.587	0.435	6.04005e-12	C02 - CD4+ Th : GPR183 ADT-CD49fhi	PDE4B
NT5C.1	1.37159e-16	-0.395814	0.117	0.234	6.19809e-12	C02 - CD4+ Th : GPR183 ADT-CD49fhi	NT5C
CHMP1B	1.40029e-16	0.428926	0.553	0.405	6.32777e-12	C02 - CD4+ Th : GPR183 ADT-CD49fhi	CHMP1B
TGFB1	1.47901e-16	0.359123	0.722	0.584	6.68351e-12	C02 - CD4+ Th : GPR183 ADT-CD49fhi	TGFB1
MYL12A	1.57883e-16	-0.3165	0.865	0.837	7.13455e-12	C02 - CD4+ Th : GPR183 ADT-CD49fhi	MYL12A
BCAS2	1.59106e-16	0.271847	0.633	0.473	7.18986e-12	C02 - CD4+ Th : GPR183 ADT-CD49fhi	BCAS2
FAM46C	1.91361e-16	0.328874	0.381	0.238	8.64743e-12	C02 - CD4+ Th : GPR183 ADT-CD49fhi	FAM46C
RGS1.1	1.93576e-16	-0.6213	0.628	0.682	8.7475e-12	C02 - CD4+ Th : GPR183 ADT-CD49fhi	RGS1
CA5B	2.7465e-16	0.299317	0.244	0.126	1.24111e-11	C02 - CD4+ Th : GPR183 ADT-CD49fhi	CA5B
TIPARP	3.02162e-16	0.290247	0.523	0.366	1.36544e-11	C02 - CD4+ Th : GPR183 ADT-CD49fhi	TIPARP
LINC-PINT	3.68405e-16	0.360314	0.443	0.294	1.66478e-11	C02 - CD4+ Th : GPR183 ADT-CD49fhi	LINC-PINT
ANKRD10	3.90698e-16	-0.412364	0.111	0.228	1.76552e-11	C02 - CD4+ Th : GPR183 ADT-CD49fhi	ANKRD10
COX5A	4.18399e-16	-0.398288	0.309	0.406	1.8907e-11	C02 - CD4+ Th : GPR183 ADT-CD49fhi	COX5A
RNF139	4.28075e-16	0.298076	0.427	0.278	1.93443e-11	C02 - CD4+ Th : GPR183 ADT-CD49fhi	RNF139
DNPH1.1	4.81976e-16	-0.46479	0.187	0.286	2.178e-11	C02 - CD4+ Th : GPR183 ADT-CD49fhi	DNPH1
S100A4.1	4.87285e-16	-0.420436	0.886	0.868	2.20199e-11	C02 - CD4+ Th : GPR183 ADT-CD49fhi	S100A4
RBM8A	5.50302e-16	0.266675	0.799	0.663	2.48676e-11	C02 - CD4+ Th : GPR183 ADT-CD49fhi	RBM8A
KLF6	6.01781e-16	0.289598	0.966	0.898	2.71939e-11	C02 - CD4+ Th : GPR183 ADT-CD49fhi	KLF6
PPP1R15A	6.27347e-16	0.327536	0.878	0.779	2.83492e-11	C02 - CD4+ Th : GPR183 ADT-CD49fhi	PPP1R15A
TUBA1C	7.45364e-16	0.297214	0.472	0.321	3.36823e-11	C02 - CD4+ Th : GPR183 ADT-CD49fhi	TUBA1C
AP2S1	8.69731e-16	-0.361031	0.13	0.252	3.93023e-11	C02 - CD4+ Th : GPR183 ADT-CD49fhi	AP2S1
IFI35	8.88983e-16	-0.357339	0.078	0.183	4.01723e-11	C02 - CD4+ Th : GPR183 ADT-CD49fhi	IFI35
DENND4A	9.88286e-16	0.275916	0.371	0.231	4.46597e-11	C02 - CD4+ Th : GPR183 ADT-CD49fhi	DENND4A
HSPH1.1	1.1489e-15	0.396818	0.807	0.676	5.19178e-11	C02 - CD4+ Th : GPR183 ADT-CD49fhi	HSPH1
PLA2G16	1.37354e-15	-0.351495	0.072	0.176	6.20689e-11	C02 - CD4+ Th : GPR183 ADT-CD49fhi	PLA2G16
TRG-AS1	1.69327e-15	-0.352951	0.042	0.13	7.65172e-11	C02 - CD4+ Th : GPR183 ADT-CD49fhi	TRG-AS1
SELENOK.1	1.79404e-15	0.393908	0.326	0.336	8.1071e-11	C02 - CD4+ Th : GPR183 ADT-CD49fhi	SELENOK
AIM1	2.22512e-15	0.330327	0.277	0.155	1.00551e-10	C02 - CD4+ Th : GPR183 ADT-CD49fhi	AIM1
RNASET2.1	2.7109e-15	0.252386	0.51	0.359	1.22503e-10	C02 - CD4+ Th : GPR183 ADT-CD49fhi	RNASET2
HN1	2.85743e-15	0.323817	0.427	0.283	1.29124e-10	C02 - CD4+ Th : GPR183 ADT-CD49fhi	HN1
ALOX5AP.1	3.32435e-15	-0.344418	0.455	0.443	1.50224e-10	C02 - CD4+ Th : GPR183 ADT-CD49fhi	ALOX5AP
PPP1CA	3.53199e-15	-0.417371	0.264	0.379	1.59607e-10	C02 - CD4+ Th : GPR183 ADT-CD49fhi	PPP1CA
GSTP1.1	4.62075e-15	-0.547683	0.294	0.377	2.08807e-10	C02 - CD4+ Th : GPR183 ADT-CD49fhi	GSTP1
RARRES3	5.2236e-15	-0.305661	0.578	0.56	2.36049e-10	C02 - CD4+ Th : GPR183 ADT-CD49fhi	RARRES3
FAM107B.1	5.63668e-15	0.391228	0.742	0.607	2.54716e-10	C02 - CD4+ Th : GPR183 ADT-CD49fhi	FAM107B
PPP1CB.1	6.35364e-15	0.270804	0.654	0.504	2.87115e-10	C02 - CD4+ Th : GPR183 ADT-CD49fhi	PPP1CB
MSI2.1	6.72143e-15	-0.440395	0.155	0.26	3.03735e-10	C02 - CD4+ Th : GPR183 ADT-CD49fhi	MSI2
HLA-F	6.99487e-15	-0.312185	0.587	0.617	3.16091e-10	C02 - CD4+ Th : GPR183 ADT-CD49fhi	HLA-F
SRI	8.01957e-15	-0.384994	0.212	0.334	3.62396e-10	C02 - CD4+ Th : GPR183 ADT-CD49fhi	SRI
ATP5MF	8.40118e-15	-0.404065	0.11	0.208	3.79641e-10	C02 - CD4+ Th : GPR183 ADT-CD49fhi	ATP5MF
ANP32A	8.55138e-15	-0.36409	0.186	0.291	3.86428e-10	C02 - CD4+ Th : GPR183 ADT-CD49fhi	ANP32A
UCP2.1	9.08715e-15	-0.447559	0.266	0.38	4.10639e-10	C02 - CD4+ Th : GPR183 ADT-CD49fhi	UCP2
TCF7	9.27503e-15	0.266555	0.453	0.309	4.19129e-10	C02 - CD4+ Th : GPR183 ADT-CD49fhi	TCF7
PMEPA1	1.03758e-14	0.291019	0.312	0.186	4.68872e-10	C02 - CD4+ Th : GPR183 ADT-CD49fhi	PMEPA1
MLF1	1.08885e-14	0.279903	0.164	0.073	4.92041e-10	C02 - CD4+ Th : GPR183 ADT-CD49fhi	MLF1
PTPN6	1.32463e-14	-0.328538	0.067	0.163	5.98585e-10	C02 - CD4+ Th : GPR183 ADT-CD49fhi	PTPN6
TPST2.1	1.58936e-14	-0.35769	0.116	0.227	7.18217e-10	C02 - CD4+ Th : GPR183 ADT-CD49fhi	TPST2
PAXX	2.20732e-14	-0.403578	0.125	0.242	9.97466e-10	C02 - CD4+ Th : GPR183 ADT-CD49fhi	PAXX
COMMD4	2.27446e-14	-0.264619	0.059	0.154	1.02781e-09	C02 - CD4+ Th : GPR183 ADT-CD49fhi	COMMD4
CD79B	2.80425e-14	-0.266448	0.04	0.124	1.26721e-09	C02 - CD4+ Th : GPR183 ADT-CD49fhi	CD79B
VAMP8	2.89157e-14	-0.341498	0.436	0.495	1.30667e-09	C02 - CD4+ Th : GPR183 ADT-CD49fhi	VAMP8
ZNF292.1	3.07798e-14	-0.463686	0.254	0.359	1.39091e-09	C02 - CD4+ Th : GPR183 ADT-CD49fhi	ZNF292
GSTO1	3.15143e-14	-0.36275	0.184	0.288	1.4241e-09	C02 - CD4+ Th : GPR183 ADT-CD49fhi	GSTO1
NDUFC2	3.30178e-14	-0.377496	0.326	0.426	1.49204e-09	C02 - CD4+ Th : GPR183 ADT-CD49fhi	NDUFC2
IDH2	3.58692e-14	-0.39264	0.199	0.296	1.62089e-09	C02 - CD4+ Th : GPR183 ADT-CD49fhi	IDH2
HMGB2.1	3.74375e-14	-0.562961	0.481	0.527	1.69176e-09	C02 - CD4+ Th : GPR183 ADT-CD49fhi	HMGB2
COX6B1	3.9735e-14	-0.311876	0.562	0.62	1.79559e-09	C02 - CD4+ Th : GPR183 ADT-CD49fhi	COX6B1
COX5B	4.02859e-14	-0.335713	0.462	0.527	1.82048e-09	C02 - CD4+ Th : GPR183 ADT-CD49fhi	COX5B
XAF1	4.14003e-14	-0.47662	0.172	0.284	1.87084e-09	C02 - CD4+ Th : GPR183 ADT-CD49fhi	XAF1
COX6A1	4.21188e-14	-0.283635	0.566	0.596	1.9033e-09	C02 - CD4+ Th : GPR183 ADT-CD49fhi	COX6A1
POMP	4.29899e-14	-0.355548	0.38	0.462	1.94267e-09	C02 - CD4+ Th : GPR183 ADT-CD49fhi	POMP
CSK	4.41294e-14	-0.397901	0.215	0.327	1.99416e-09	C02 - CD4+ Th : GPR183 ADT-CD49fhi	CSK
GBP5.1	4.99216e-14	-0.476668	0.223	0.332	2.2559e-09	C02 - CD4+ Th : GPR183 ADT-CD49fhi	GBP5
AC016831.7	5.17718e-14	0.283936	0.479	0.336	2.33951e-09	C02 - CD4+ Th : GPR183 ADT-CD49fhi	AC016831.7
GRPEL1	5.24393e-14	0.257627	0.37	0.238	2.36968e-09	C02 - CD4+ Th : GPR183 ADT-CD49fhi	GRPEL1
CLEC2D	5.42251e-14	-0.392281	0.559	0.581	2.45038e-09	C02 - CD4+ Th : GPR183 ADT-CD49fhi	CLEC2D
PMAIP1.1	5.43769e-14	-0.553666	0.426	0.462	2.45724e-09	C02 - CD4+ Th : GPR183 ADT-CD49fhi	PMAIP1
PYHIN1	5.5003e-14	-0.460666	0.144	0.255	2.48553e-09	C02 - CD4+ Th : GPR183 ADT-CD49fhi	PYHIN1
CDC42EP3	5.51506e-14	0.27436	0.418	0.28	2.4922e-09	C02 - CD4+ Th : GPR183 ADT-CD49fhi	CDC42EP3
FAM177A1	5.96606e-14	0.3158	0.625	0.486	2.696e-09	C02 - CD4+ Th : GPR183 ADT-CD49fhi	FAM177A1
PTPRC	6.51358e-14	-0.25263	0.941	0.913	2.94342e-09	C02 - CD4+ Th : GPR183 ADT-CD49fhi	PTPRC
GUK1	6.55313e-14	-0.27741	0.64	0.661	2.96129e-09	C02 - CD4+ Th : GPR183 ADT-CD49fhi	GUK1
UAP1	7.50623e-14	0.318123	0.289	0.171	3.39199e-09	C02 - CD4+ Th : GPR183 ADT-CD49fhi	UAP1
TAP1	7.52101e-14	-0.389609	0.323	0.429	3.39867e-09	C02 - CD4+ Th : GPR183 ADT-CD49fhi	TAP1
RBX1	8.14401e-14	-0.350053	0.324	0.405	3.6802e-09	C02 - CD4+ Th : GPR183 ADT-CD49fhi	RBX1
TUBB.1	8.16589e-14	-0.458431	0.289	0.309	3.69008e-09	C02 - CD4+ Th : GPR183 ADT-CD49fhi	TUBB
PRDX5	9.02088e-14	-0.371403	0.298	0.402	4.07645e-09	C02 - CD4+ Th : GPR183 ADT-CD49fhi	PRDX5
UQCR11	9.23713e-14	-0.293792	0.559	0.596	4.17417e-09	C02 - CD4+ Th : GPR183 ADT-CD49fhi	UQCR11
GABARAPL2	1.20606e-13	-0.377886	0.316	0.425	5.45008e-09	C02 - CD4+ Th : GPR183 ADT-CD49fhi	GABARAPL2
SSNA1	1.2965e-13	-0.351793	0.167	0.285	5.85877e-09	C02 - CD4+ Th : GPR183 ADT-CD49fhi	SSNA1
FAM49B	1.31302e-13	-0.335533	0.394	0.451	5.93341e-09	C02 - CD4+ Th : GPR183 ADT-CD49fhi	FAM49B
PNISR	1.43595e-13	-0.332488	0.646	0.663	6.48891e-09	C02 - CD4+ Th : GPR183 ADT-CD49fhi	PNISR
IFI16	1.44408e-13	-0.417769	0.402	0.497	6.52565e-09	C02 - CD4+ Th : GPR183 ADT-CD49fhi	IFI16
GNB2L1	1.65621e-13	0.370528	0.638	0.505	7.48423e-09	C02 - CD4+ Th : GPR183 ADT-CD49fhi	GNB2L1
ID2.1	1.66119e-13	-0.542195	0.612	0.667	7.50676e-09	C02 - CD4+ Th : GPR183 ADT-CD49fhi	ID2
SEM1	1.75903e-13	-0.410936	0.129	0.227	7.94889e-09	C02 - CD4+ Th : GPR183 ADT-CD49fhi	SEM1
PGAM1	1.85196e-13	-0.391333	0.314	0.406	8.36881e-09	C02 - CD4+ Th : GPR183 ADT-CD49fhi	PGAM1
PSMB3	2.30203e-13	-0.340624	0.345	0.431	1.04026e-08	C02 - CD4+ Th : GPR183 ADT-CD49fhi	PSMB3
CCL3L3.1	2.33203e-13	-0.613593	0.048	0.118	1.05382e-08	C02 - CD4+ Th : GPR183 ADT-CD49fhi	CCL3L3
ATP5PF	2.34986e-13	-0.409854	0.153	0.249	1.06188e-08	C02 - CD4+ Th : GPR183 ADT-CD49fhi	ATP5PF
RANBP1	2.71401e-13	-0.349529	0.299	0.353	1.22644e-08	C02 - CD4+ Th : GPR183 ADT-CD49fhi	RANBP1
NOP10	3.03913e-13	-0.382675	0.261	0.361	1.37335e-08	C02 - CD4+ Th : GPR183 ADT-CD49fhi	NOP10
CASP1	3.15427e-13	-0.376467	0.143	0.243	1.42538e-08	C02 - CD4+ Th : GPR183 ADT-CD49fhi	CASP1
ARPC5	3.70535e-13	-0.336907	0.354	0.403	1.67441e-08	C02 - CD4+ Th : GPR183 ADT-CD49fhi	ARPC5
PSMB6	3.80363e-13	-0.342446	0.261	0.353	1.71882e-08	C02 - CD4+ Th : GPR183 ADT-CD49fhi	PSMB6
WIPF1	4.29617e-13	-0.405686	0.375	0.483	1.9414e-08	C02 - CD4+ Th : GPR183 ADT-CD49fhi	WIPF1
HMGN2	4.45298e-13	-0.407686	0.513	0.534	2.01226e-08	C02 - CD4+ Th : GPR183 ADT-CD49fhi	HMGN2
PIN1	4.98845e-13	-0.345751	0.174	0.29	2.25423e-08	C02 - CD4+ Th : GPR183 ADT-CD49fhi	PIN1
MRPS34	5.18281e-13	-0.31811	0.122	0.233	2.34206e-08	C02 - CD4+ Th : GPR183 ADT-CD49fhi	MRPS34
TALDO1	5.37686e-13	-0.341976	0.197	0.293	2.42975e-08	C02 - CD4+ Th : GPR183 ADT-CD49fhi	TALDO1
SPATS2L	5.6479e-13	-0.303588	0.072	0.166	2.55223e-08	C02 - CD4+ Th : GPR183 ADT-CD49fhi	SPATS2L
TNFSF9.1	5.70409e-13	-0.689928	0.145	0.225	2.57762e-08	C02 - CD4+ Th : GPR183 ADT-CD49fhi	TNFSF9
RBPJ	6.36615e-13	-0.437672	0.372	0.44	2.8768e-08	C02 - CD4+ Th : GPR183 ADT-CD49fhi	RBPJ
ATP5MPL	6.58385e-13	-0.378634	0.112	0.211	2.97518e-08	C02 - CD4+ Th : GPR183 ADT-CD49fhi	ATP5MPL
NAB1	8.75737e-13	-0.320952	0.056	0.136	3.95737e-08	C02 - CD4+ Th : GPR183 ADT-CD49fhi	NAB1
OTULIN.1	1.03555e-12	-0.361943	0.106	0.206	4.67954e-08	C02 - CD4+ Th : GPR183 ADT-CD49fhi	OTULIN
RAC1	1.07714e-12	-0.349967	0.386	0.466	4.86751e-08	C02 - CD4+ Th : GPR183 ADT-CD49fhi	RAC1
RTKN2.1	1.16464e-12	-0.337036	0.039	0.115	5.2629e-08	C02 - CD4+ Th : GPR183 ADT-CD49fhi	RTKN2
RAB27A	1.2382e-12	-0.390727	0.221	0.325	5.59531e-08	C02 - CD4+ Th : GPR183 ADT-CD49fhi	RAB27A
BCL2A1	1.24691e-12	0.276774	0.221	0.12	5.63464e-08	C02 - CD4+ Th : GPR183 ADT-CD49fhi	BCL2A1
S100A11.1	1.2799e-12	0.322395	0.785	0.684	5.78372e-08	C02 - CD4+ Th : GPR183 ADT-CD49fhi	S100A11
PDIA6	1.63417e-12	-0.344469	0.309	0.374	7.38467e-08	C02 - CD4+ Th : GPR183 ADT-CD49fhi	PDIA6
NDUFA11	1.68632e-12	-0.305878	0.389	0.449	7.62032e-08	C02 - CD4+ Th : GPR183 ADT-CD49fhi	NDUFA11
CCDC50	1.73916e-12	-0.318118	0.04	0.114	7.8591e-08	C02 - CD4+ Th : GPR183 ADT-CD49fhi	CCDC50
ISG15	1.757e-12	-0.614557	0.563	0.589	7.93971e-08	C02 - CD4+ Th : GPR183 ADT-CD49fhi	ISG15
OAT	1.83006e-12	0.263358	0.386	0.26	8.26987e-08	C02 - CD4+ Th : GPR183 ADT-CD49fhi	OAT
FASLG.1	1.84012e-12	-0.417086	0.044	0.115	8.3153e-08	C02 - CD4+ Th : GPR183 ADT-CD49fhi	FASLG
UBXN4	1.96039e-12	-0.354092	0.365	0.44	8.8588e-08	C02 - CD4+ Th : GPR183 ADT-CD49fhi	UBXN4
CCDC167	2.08463e-12	-0.341093	0.13	0.235	9.42025e-08	C02 - CD4+ Th : GPR183 ADT-CD49fhi	CCDC167
BLOC1S1	2.09741e-12	-0.368894	0.332	0.426	9.478e-08	C02 - CD4+ Th : GPR183 ADT-CD49fhi	BLOC1S1
NFKB1	2.2079e-12	0.280684	0.458	0.326	9.97727e-08	C02 - CD4+ Th : GPR183 ADT-CD49fhi	NFKB1
PSMA5	2.38163e-12	-0.344395	0.289	0.383	1.07624e-07	C02 - CD4+ Th : GPR183 ADT-CD49fhi	PSMA5
CKLF	2.44941e-12	-0.385369	0.484	0.56	1.10686e-07	C02 - CD4+ Th : GPR183 ADT-CD49fhi	CKLF
VAMP5	2.52119e-12	-0.361765	0.198	0.296	1.1393e-07	C02 - CD4+ Th : GPR183 ADT-CD49fhi	VAMP5
MRPL51	2.90561e-12	-0.33632	0.206	0.294	1.31302e-07	C02 - CD4+ Th : GPR183 ADT-CD49fhi	MRPL51
IL2RG	3.02021e-12	-0.304003	0.586	0.619	1.3648e-07	C02 - CD4+ Th : GPR183 ADT-CD49fhi	IL2RG
ANAPC16	3.35788e-12	-0.280881	0.563	0.589	1.51739e-07	C02 - CD4+ Th : GPR183 ADT-CD49fhi	ANAPC16
RHOB.1	3.48045e-12	-0.494126	0.155	0.247	1.57278e-07	C02 - CD4+ Th : GPR183 ADT-CD49fhi	RHOB
GLIPR2	3.53108e-12	-0.368604	0.207	0.299	1.59566e-07	C02 - CD4+ Th : GPR183 ADT-CD49fhi	GLIPR2
TAGLN2	3.685e-12	0.252286	0.785	0.674	1.66521e-07	C02 - CD4+ Th : GPR183 ADT-CD49fhi	TAGLN2
SPCS1	3.68667e-12	-0.289694	0.491	0.544	1.66597e-07	C02 - CD4+ Th : GPR183 ADT-CD49fhi	SPCS1
MAGEH1.1	4.02926e-12	-0.412575	0.035	0.105	1.82078e-07	C02 - CD4+ Th : GPR183 ADT-CD49fhi	MAGEH1
SELPLG	5.63751e-12	-0.302569	0.071	0.157	2.54753e-07	C02 - CD4+ Th : GPR183 ADT-CD49fhi	SELPLG
SRSF9	6.5316e-12	-0.293208	0.419	0.478	2.95156e-07	C02 - CD4+ Th : GPR183 ADT-CD49fhi	SRSF9
NDUFB10	7.12872e-12	-0.325905	0.275	0.353	3.2214e-07	C02 - CD4+ Th : GPR183 ADT-CD49fhi	NDUFB10
PYCARD	7.31612e-12	-0.335937	0.135	0.235	3.30608e-07	C02 - CD4+ Th : GPR183 ADT-CD49fhi	PYCARD
COPZ1	7.69258e-12	-0.299797	0.124	0.225	3.4762e-07	C02 - CD4+ Th : GPR183 ADT-CD49fhi	COPZ1
PSMB2	8.22795e-12	-0.307323	0.241	0.318	3.71813e-07	C02 - CD4+ Th : GPR183 ADT-CD49fhi	PSMB2
TMEM160	8.82405e-12	-0.353745	0.189	0.29	3.9875e-07	C02 - CD4+ Th : GPR183 ADT-CD49fhi	TMEM160
HNRNPR	9.23391e-12	-0.343451	0.263	0.342	4.17271e-07	C02 - CD4+ Th : GPR183 ADT-CD49fhi	HNRNPR
POLR2G	9.33336e-12	-0.316751	0.129	0.229	4.21765e-07	C02 - CD4+ Th : GPR183 ADT-CD49fhi	POLR2G
MT1E	1.01426e-11	-0.271617	0.04	0.114	4.58335e-07	C02 - CD4+ Th : GPR183 ADT-CD49fhi	MT1E
TRMT112	1.02748e-11	-0.270283	0.545	0.578	4.6431e-07	C02 - CD4+ Th : GPR183 ADT-CD49fhi	TRMT112
CD84	1.03619e-11	-0.413989	0.106	0.197	4.68246e-07	C02 - CD4+ Th : GPR183 ADT-CD49fhi	CD84
SATB1	1.04127e-11	0.264364	0.242	0.141	4.70539e-07	C02 - CD4+ Th : GPR183 ADT-CD49fhi	SATB1
ARPC5L.1	1.08268e-11	-0.357261	0.202	0.306	4.89254e-07	C02 - CD4+ Th : GPR183 ADT-CD49fhi	ARPC5L
SDF2L1	1.29735e-11	-0.319164	0.126	0.225	5.86261e-07	C02 - CD4+ Th : GPR183 ADT-CD49fhi	SDF2L1
SKAP1	1.32779e-11	-0.36062	0.342	0.431	6.00015e-07	C02 - CD4+ Th : GPR183 ADT-CD49fhi	SKAP1
ATP5MD	1.58962e-11	-0.378203	0.139	0.241	7.18332e-07	C02 - CD4+ Th : GPR183 ADT-CD49fhi	ATP5MD
NDUFB7	1.60359e-11	-0.330917	0.275	0.365	7.24648e-07	C02 - CD4+ Th : GPR183 ADT-CD49fhi	NDUFB7
TMEM258	1.91451e-11	-0.319978	0.404	0.49	8.65147e-07	C02 - CD4+ Th : GPR183 ADT-CD49fhi	TMEM258
ZNF267	1.93817e-11	0.308474	0.41	0.29	8.75838e-07	C02 - CD4+ Th : GPR183 ADT-CD49fhi	ZNF267
PPM1G.1	1.97881e-11	-0.325973	0.236	0.313	8.94202e-07	C02 - CD4+ Th : GPR183 ADT-CD49fhi	PPM1G
IQGAP1.1	2.18222e-11	-0.33031	0.439	0.506	9.86122e-07	C02 - CD4+ Th : GPR183 ADT-CD49fhi	IQGAP1
SRP9	2.18889e-11	-0.350698	0.234	0.317	9.89138e-07	C02 - CD4+ Th : GPR183 ADT-CD49fhi	SRP9
TBC1D4.1	2.28363e-11	-0.418692	0.114	0.197	1.03195e-06	C02 - CD4+ Th : GPR183 ADT-CD49fhi	TBC1D4
ATP5ME	2.29593e-11	-0.359249	0.121	0.214	1.03751e-06	C02 - CD4+ Th : GPR183 ADT-CD49fhi	ATP5ME
SAT1.1	2.43822e-11	-0.311586	0.854	0.779	1.10181e-06	C02 - CD4+ Th : GPR183 ADT-CD49fhi	SAT1
RHOC.1	2.76575e-11	-0.347597	0.167	0.272	1.24982e-06	C02 - CD4+ Th : GPR183 ADT-CD49fhi	RHOC
SELENOH	2.85358e-11	-0.336147	0.117	0.202	1.2895e-06	C02 - CD4+ Th : GPR183 ADT-CD49fhi	SELENOH
PSMA1	2.89289e-11	-0.311513	0.322	0.4	1.30727e-06	C02 - CD4+ Th : GPR183 ADT-CD49fhi	PSMA1
NDUFB3	2.93613e-11	-0.320794	0.189	0.29	1.32681e-06	C02 - CD4+ Th : GPR183 ADT-CD49fhi	NDUFB3
IFI6	3.08707e-11	-0.624771	0.306	0.395	1.39502e-06	C02 - CD4+ Th : GPR183 ADT-CD49fhi	IFI6
LSM2	3.12816e-11	-0.319833	0.149	0.25	1.41358e-06	C02 - CD4+ Th : GPR183 ADT-CD49fhi	LSM2
IL2RA.1	3.19584e-11	-0.554552	0.073	0.125	1.44417e-06	C02 - CD4+ Th : GPR183 ADT-CD49fhi	IL2RA
DBNL	3.30709e-11	-0.285932	0.116	0.214	1.49444e-06	C02 - CD4+ Th : GPR183 ADT-CD49fhi	DBNL
HCLS1	3.54684e-11	-0.29892	0.376	0.422	1.60278e-06	C02 - CD4+ Th : GPR183 ADT-CD49fhi	HCLS1
CHMP4A	3.65681e-11	-0.349789	0.336	0.417	1.65247e-06	C02 - CD4+ Th : GPR183 ADT-CD49fhi	CHMP4A
PLSCR1	3.92359e-11	-0.290013	0.066	0.148	1.77303e-06	C02 - CD4+ Th : GPR183 ADT-CD49fhi	PLSCR1
CBLB.1	4.57187e-11	-0.376197	0.189	0.289	2.06598e-06	C02 - CD4+ Th : GPR183 ADT-CD49fhi	CBLB
LRRFIP1	4.72628e-11	0.290425	0.682	0.562	2.13576e-06	C02 - CD4+ Th : GPR183 ADT-CD49fhi	LRRFIP1
MYC	5.09388e-11	0.38585	0.205	0.115	2.30187e-06	C02 - CD4+ Th : GPR183 ADT-CD49fhi	MYC
SAMD9L	5.11013e-11	-0.373994	0.131	0.23	2.30922e-06	C02 - CD4+ Th : GPR183 ADT-CD49fhi	SAMD9L
CCND2.1	5.13971e-11	-0.370031	0.294	0.363	2.32258e-06	C02 - CD4+ Th : GPR183 ADT-CD49fhi	CCND2
SGK1	5.15695e-11	0.265593	0.33	0.217	2.33037e-06	C02 - CD4+ Th : GPR183 ADT-CD49fhi	SGK1
RPL23.1	5.27706e-11	0.2829	0.917	0.858	2.38465e-06	C02 - CD4+ Th : GPR183 ADT-CD49fhi	RPL23
STAM	6.51763e-11	-0.333669	0.081	0.164	2.94525e-06	C02 - CD4+ Th : GPR183 ADT-CD49fhi	STAM
ATP5F1D	6.52966e-11	-0.371845	0.179	0.281	2.95069e-06	C02 - CD4+ Th : GPR183 ADT-CD49fhi	ATP5F1D
SLA2	6.72478e-11	-0.27691	0.078	0.162	3.03886e-06	C02 - CD4+ Th : GPR183 ADT-CD49fhi	SLA2
PARP14	6.88633e-11	-0.403114	0.196	0.291	3.11186e-06	C02 - CD4+ Th : GPR183 ADT-CD49fhi	PARP14
ISG20	7.21162e-11	-0.381766	0.563	0.6	3.25886e-06	C02 - CD4+ Th : GPR183 ADT-CD49fhi	ISG20
AC008105.3	7.52987e-11	-0.2761	0.038	0.106	3.40267e-06	C02 - CD4+ Th : GPR183 ADT-CD49fhi	AC008105.3
BANF1	7.88651e-11	-0.314488	0.208	0.301	3.56383e-06	C02 - CD4+ Th : GPR183 ADT-CD49fhi	BANF1
HBP1	8.10702e-11	0.25897	0.558	0.433	3.66348e-06	C02 - CD4+ Th : GPR183 ADT-CD49fhi	HBP1
FYB1.1	8.61609e-11	-0.466494	0.229	0.316	3.89353e-06	C02 - CD4+ Th : GPR183 ADT-CD49fhi	FYB1
SAMD3.1	8.89076e-11	-0.36797	0.154	0.244	4.01765e-06	C02 - CD4+ Th : GPR183 ADT-CD49fhi	SAMD3
AL121944.1	8.99118e-11	0.34564	0.153	0.081	4.06303e-06	C02 - CD4+ Th : GPR183 ADT-CD49fhi	AL121944.1
FAM96B	9.56228e-11	-0.319797	0.354	0.436	4.3211e-06	C02 - CD4+ Th : GPR183 ADT-CD49fhi	FAM96B
AC133644.2.1	1.18509e-10	-0.351317	0.047	0.111	5.35532e-06	C02 - CD4+ Th : GPR183 ADT-CD49fhi	AC133644.2
CD53	1.21236e-10	-0.278512	0.626	0.65	5.47854e-06	C02 - CD4+ Th : GPR183 ADT-CD49fhi	CD53
AGTRAP	1.27942e-10	-0.284539	0.086	0.172	5.78156e-06	C02 - CD4+ Th : GPR183 ADT-CD49fhi	AGTRAP
ZNRF1	1.52313e-10	-0.331428	0.153	0.248	6.88289e-06	C02 - CD4+ Th : GPR183 ADT-CD49fhi	ZNRF1
METTL26	1.53918e-10	-0.254786	0.061	0.138	6.9554e-06	C02 - CD4+ Th : GPR183 ADT-CD49fhi	METTL26
FABP5.1	1.81677e-10	-0.475426	0.197	0.291	8.2098e-06	C02 - CD4+ Th : GPR183 ADT-CD49fhi	FABP5
CHMP2A	1.95911e-10	-0.317992	0.213	0.308	8.85302e-06	C02 - CD4+ Th : GPR183 ADT-CD49fhi	CHMP2A
ITGAE	1.98407e-10	-0.319844	0.117	0.21	8.96581e-06	C02 - CD4+ Th : GPR183 ADT-CD49fhi	ITGAE
ATP5MC2.1	2.75712e-10	-0.422083	0.28	0.36	1.24592e-05	C02 - CD4+ Th : GPR183 ADT-CD49fhi	ATP5MC2
SNRPD3	2.78917e-10	-0.319183	0.268	0.371	1.2604e-05	C02 - CD4+ Th : GPR183 ADT-CD49fhi	SNRPD3
C12orf75	2.93686e-10	-0.362794	0.24	0.318	1.32714e-05	C02 - CD4+ Th : GPR183 ADT-CD49fhi	C12orf75
SPN	3.09987e-10	-0.291854	0.107	0.198	1.4008e-05	C02 - CD4+ Th : GPR183 ADT-CD49fhi	SPN
ATP5IF1	3.17025e-10	-0.391606	0.177	0.255	1.4326e-05	C02 - CD4+ Th : GPR183 ADT-CD49fhi	ATP5IF1
AIP	3.20154e-10	-0.311347	0.216	0.319	1.44675e-05	C02 - CD4+ Th : GPR183 ADT-CD49fhi	AIP
PRDM1	3.27091e-10	-0.333024	0.294	0.303	1.47809e-05	C02 - CD4+ Th : GPR183 ADT-CD49fhi	PRDM1
CCL20.1	3.32013e-10	0.540083	0.138	0.067	1.50033e-05	C02 - CD4+ Th : GPR183 ADT-CD49fhi	CCL20
KDSR.1	3.37291e-10	0.25783	0.292	0.189	1.52418e-05	C02 - CD4+ Th : GPR183 ADT-CD49fhi	KDSR
SFT2D1	3.48572e-10	-0.323738	0.182	0.271	1.57516e-05	C02 - CD4+ Th : GPR183 ADT-CD49fhi	SFT2D1
ABHD17A	3.55405e-10	-0.329587	0.372	0.451	1.60604e-05	C02 - CD4+ Th : GPR183 ADT-CD49fhi	ABHD17A
SRSF3.1	3.85323e-10	-0.259492	0.726	0.727	1.74123e-05	C02 - CD4+ Th : GPR183 ADT-CD49fhi	SRSF3
CD9.1	4.49581e-10	-0.307453	0.042	0.105	2.03161e-05	C02 - CD4+ Th : GPR183 ADT-CD49fhi	CD9
PSMB10	5.29615e-10	-0.250394	0.086	0.169	2.39328e-05	C02 - CD4+ Th : GPR183 ADT-CD49fhi	PSMB10
SIRPG	6.07168e-10	-0.283542	0.082	0.163	2.74373e-05	C02 - CD4+ Th : GPR183 ADT-CD49fhi	SIRPG
ITGA1.1	6.09039e-10	-0.323698	0.058	0.125	2.75219e-05	C02 - CD4+ Th : GPR183 ADT-CD49fhi	ITGA1
PDCD4	6.30347e-10	0.253504	0.683	0.572	2.84848e-05	C02 - CD4+ Th : GPR183 ADT-CD49fhi	PDCD4
ZNHIT1	7.32434e-10	-0.295983	0.183	0.286	3.3098e-05	C02 - CD4+ Th : GPR183 ADT-CD49fhi	ZNHIT1
TMPO	7.39775e-10	-0.335328	0.135	0.212	3.34297e-05	C02 - CD4+ Th : GPR183 ADT-CD49fhi	TMPO
HTATIP2.1	7.5126e-10	-0.335654	0.115	0.182	3.39487e-05	C02 - CD4+ Th : GPR183 ADT-CD49fhi	HTATIP2
HNRNPA3	8.01537e-10	-0.261891	0.466	0.491	3.62207e-05	C02 - CD4+ Th : GPR183 ADT-CD49fhi	HNRNPA3
BUB3	8.02663e-10	-0.324624	0.311	0.395	3.62716e-05	C02 - CD4+ Th : GPR183 ADT-CD49fhi	BUB3
BTN3A2.1	8.22594e-10	-0.354266	0.297	0.383	3.71722e-05	C02 - CD4+ Th : GPR183 ADT-CD49fhi	BTN3A2
OAS1	8.83413e-10	-0.281393	0.053	0.123	3.99205e-05	C02 - CD4+ Th : GPR183 ADT-CD49fhi	OAS1
ITM2A	9.55136e-10	-0.373046	0.51	0.55	4.31616e-05	C02 - CD4+ Th : GPR183 ADT-CD49fhi	ITM2A
ATP5MG.1	9.7369e-10	-0.385131	0.299	0.38	4.40001e-05	C02 - CD4+ Th : GPR183 ADT-CD49fhi	ATP5MG
TMED9	9.74284e-10	-0.301539	0.203	0.299	4.40269e-05	C02 - CD4+ Th : GPR183 ADT-CD49fhi	TMED9
NXT1	9.75833e-10	0.25211	0.321	0.218	4.40969e-05	C02 - CD4+ Th : GPR183 ADT-CD49fhi	NXT1
MYO1G	1.02383e-09	-0.317505	0.153	0.236	4.62656e-05	C02 - CD4+ Th : GPR183 ADT-CD49fhi	MYO1G
MAP2K2	1.05846e-09	-0.293151	0.319	0.397	4.78308e-05	C02 - CD4+ Th : GPR183 ADT-CD49fhi	MAP2K2
IKZF3	1.11155e-09	-0.390519	0.164	0.247	5.02299e-05	C02 - CD4+ Th : GPR183 ADT-CD49fhi	IKZF3
HSBP1	1.19995e-09	-0.251656	0.112	0.201	5.42247e-05	C02 - CD4+ Th : GPR183 ADT-CD49fhi	HSBP1
UBE2L6	1.32348e-09	-0.311427	0.199	0.299	5.98069e-05	C02 - CD4+ Th : GPR183 ADT-CD49fhi	UBE2L6
ATP13A3	1.32598e-09	-0.269285	0.063	0.134	5.99196e-05	C02 - CD4+ Th : GPR183 ADT-CD49fhi	ATP13A3
EPSTI1.1	1.32779e-09	-0.371179	0.227	0.318	6.00015e-05	C02 - CD4+ Th : GPR183 ADT-CD49fhi	EPSTI1
EID1	1.37076e-09	-0.311597	0.333	0.39	6.19432e-05	C02 - CD4+ Th : GPR183 ADT-CD49fhi	EID1
FERMT3	1.44117e-09	-0.296693	0.183	0.283	6.51249e-05	C02 - CD4+ Th : GPR183 ADT-CD49fhi	FERMT3
MXD4	1.48645e-09	-0.33366	0.288	0.38	6.7171e-05	C02 - CD4+ Th : GPR183 ADT-CD49fhi	MXD4
NDUFB8	1.49593e-09	-0.259283	0.452	0.5	6.75997e-05	C02 - CD4+ Th : GPR183 ADT-CD49fhi	NDUFB8
PLCG2.1	1.50576e-09	-0.415575	0.076	0.149	6.80438e-05	C02 - CD4+ Th : GPR183 ADT-CD49fhi	PLCG2
RGS2.1	1.83506e-09	-0.385977	0.458	0.461	8.29245e-05	C02 - CD4+ Th : GPR183 ADT-CD49fhi	RGS2
N4BP2L2	2.07113e-09	-0.261944	0.665	0.657	9.35921e-05	C02 - CD4+ Th : GPR183 ADT-CD49fhi	N4BP2L2
PSMA4	2.07521e-09	-0.323842	0.179	0.266	9.37767e-05	C02 - CD4+ Th : GPR183 ADT-CD49fhi	PSMA4
APMAP	2.19934e-09	-0.293113	0.126	0.206	9.93859e-05	C02 - CD4+ Th : GPR183 ADT-CD49fhi	APMAP
NDUFA13	2.21265e-09	-0.304649	0.33	0.415	9.99874e-05	C02 - CD4+ Th : GPR183 ADT-CD49fhi	NDUFA13
TBC1D10C	2.28136e-09	-0.349788	0.355	0.438	0.000103093	C02 - CD4+ Th : GPR183 ADT-CD49fhi	TBC1D10C
PPP1R18	2.31263e-09	-0.317041	0.247	0.336	0.000104505	C02 - CD4+ Th : GPR183 ADT-CD49fhi	PPP1R18
CYC1	2.36053e-09	-0.252676	0.111	0.198	0.00010667	C02 - CD4+ Th : GPR183 ADT-CD49fhi	CYC1
GCHFR	2.40873e-09	-0.293011	0.117	0.203	0.000108848	C02 - CD4+ Th : GPR183 ADT-CD49fhi	GCHFR
CLIC3.1	2.42995e-09	-0.363231	0.058	0.124	0.000109807	C02 - CD4+ Th : GPR183 ADT-CD49fhi	CLIC3
CDK2AP2	2.51272e-09	-0.331185	0.28	0.357	0.000113548	C02 - CD4+ Th : GPR183 ADT-CD49fhi	CDK2AP2
CEBPB	2.62121e-09	0.251829	0.491	0.376	0.00011845	C02 - CD4+ Th : GPR183 ADT-CD49fhi	CEBPB
HSPB1.1	3.06067e-09	-0.396306	0.426	0.452	0.000138309	C02 - CD4+ Th : GPR183 ADT-CD49fhi	HSPB1
MRPL52	3.06487e-09	-0.284628	0.167	0.246	0.000138498	C02 - CD4+ Th : GPR183 ADT-CD49fhi	MRPL52
ISCU	3.19042e-09	-0.300517	0.379	0.445	0.000144172	C02 - CD4+ Th : GPR183 ADT-CD49fhi	ISCU
TOX	3.20779e-09	-0.28119	0.059	0.126	0.000144957	C02 - CD4+ Th : GPR183 ADT-CD49fhi	TOX
LUC7L3	3.43342e-09	-0.324516	0.426	0.483	0.000155153	C02 - CD4+ Th : GPR183 ADT-CD49fhi	LUC7L3
UGP2	3.51795e-09	-0.399104	0.271	0.34	0.000158973	C02 - CD4+ Th : GPR183 ADT-CD49fhi	UGP2
LIMD2	3.97478e-09	-0.301161	0.557	0.593	0.000179617	C02 - CD4+ Th : GPR183 ADT-CD49fhi	LIMD2
CCNDBP1	4.03176e-09	-0.296739	0.194	0.293	0.000182191	C02 - CD4+ Th : GPR183 ADT-CD49fhi	CCNDBP1
PRR13	4.19661e-09	-0.320302	0.28	0.377	0.000189641	C02 - CD4+ Th : GPR183 ADT-CD49fhi	PRR13
SNRPD1	4.69638e-09	-0.280217	0.181	0.257	0.000212225	C02 - CD4+ Th : GPR183 ADT-CD49fhi	SNRPD1
OGA	4.80178e-09	-0.315539	0.09	0.167	0.000216988	C02 - CD4+ Th : GPR183 ADT-CD49fhi	OGA
LAMTOR5	4.81703e-09	-0.289149	0.283	0.354	0.000217677	C02 - CD4+ Th : GPR183 ADT-CD49fhi	LAMTOR5
MYH9	4.82658e-09	-0.276694	0.41	0.452	0.000218108	C02 - CD4+ Th : GPR183 ADT-CD49fhi	MYH9
PREX1	5.22665e-09	-0.305292	0.179	0.274	0.000236187	C02 - CD4+ Th : GPR183 ADT-CD49fhi	PREX1
HMGN3	5.48835e-09	-0.324177	0.218	0.287	0.000248013	C02 - CD4+ Th : GPR183 ADT-CD49fhi	HMGN3
ATP5F1C	5.77169e-09	-0.274766	0.105	0.172	0.000260817	C02 - CD4+ Th : GPR183 ADT-CD49fhi	ATP5F1C
C4orf48	6.50266e-09	-0.302843	0.192	0.28	0.000293849	C02 - CD4+ Th : GPR183 ADT-CD49fhi	C4orf48
TMCO1	6.72825e-09	-0.310279	0.256	0.343	0.000304043	C02 - CD4+ Th : GPR183 ADT-CD49fhi	TMCO1
SP110	6.9333e-09	-0.295111	0.135	0.223	0.000313309	C02 - CD4+ Th : GPR183 ADT-CD49fhi	SP110
PTPN7.1	7.195e-09	-0.326924	0.26	0.359	0.000325135	C02 - CD4+ Th : GPR183 ADT-CD49fhi	PTPN7
AKIRIN2	7.41185e-09	-0.332662	0.235	0.309	0.000334934	C02 - CD4+ Th : GPR183 ADT-CD49fhi	AKIRIN2
FAM111A	8.58436e-09	-0.295081	0.104	0.181	0.000387919	C02 - CD4+ Th : GPR183 ADT-CD49fhi	FAM111A
PLEKHJ1	8.94524e-09	-0.278325	0.134	0.217	0.000404227	C02 - CD4+ Th : GPR183 ADT-CD49fhi	PLEKHJ1
GYPC	9.07621e-09	-0.26272	0.439	0.489	0.000410145	C02 - CD4+ Th : GPR183 ADT-CD49fhi	GYPC
CORO1B	1.01903e-08	-0.363678	0.297	0.337	0.000460487	C02 - CD4+ Th : GPR183 ADT-CD49fhi	CORO1B
NUCKS1	1.01994e-08	-0.281274	0.331	0.372	0.000460903	C02 - CD4+ Th : GPR183 ADT-CD49fhi	NUCKS1
CARHSP1	1.13133e-08	-0.288746	0.146	0.22	0.000511239	C02 - CD4+ Th : GPR183 ADT-CD49fhi	CARHSP1
ITGAL	1.1455e-08	-0.30838	0.159	0.25	0.000517639	C02 - CD4+ Th : GPR183 ADT-CD49fhi	ITGAL
GK.1	1.18837e-08	-0.412756	0.08	0.151	0.000537014	C02 - CD4+ Th : GPR183 ADT-CD49fhi	GK
NUDT1	1.2257e-08	-0.261153	0.098	0.169	0.000553881	C02 - CD4+ Th : GPR183 ADT-CD49fhi	NUDT1
TBCB	1.29665e-08	-0.297236	0.259	0.345	0.000585944	C02 - CD4+ Th : GPR183 ADT-CD49fhi	TBCB
MDH1	1.31182e-08	-0.279203	0.218	0.292	0.000592796	C02 - CD4+ Th : GPR183 ADT-CD49fhi	MDH1
GLCCI1.1	1.44042e-08	-0.311603	0.135	0.215	0.000650913	C02 - CD4+ Th : GPR183 ADT-CD49fhi	GLCCI1
COX17	1.99429e-08	-0.287417	0.268	0.338	0.000901201	C02 - CD4+ Th : GPR183 ADT-CD49fhi	COX17
EFHD2	2.53169e-08	-0.28736	0.302	0.361	0.00114404	C02 - CD4+ Th : GPR183 ADT-CD49fhi	EFHD2
CTSZ	2.61378e-08	-0.265546	0.15	0.238	0.00118114	C02 - CD4+ Th : GPR183 ADT-CD49fhi	CTSZ
MAF	2.70048e-08	-0.372804	0.247	0.287	0.00122032	C02 - CD4+ Th : GPR183 ADT-CD49fhi	MAF
TRAF3IP3	2.78643e-08	-0.358205	0.283	0.364	0.00125916	C02 - CD4+ Th : GPR183 ADT-CD49fhi	TRAF3IP3
NCOR1	2.93811e-08	-0.294707	0.366	0.421	0.0013277	C02 - CD4+ Th : GPR183 ADT-CD49fhi	NCOR1
SLFN5	3.1231e-08	-0.332923	0.274	0.368	0.0014113	C02 - CD4+ Th : GPR183 ADT-CD49fhi	SLFN5
PSMC5	3.15787e-08	-0.269511	0.258	0.324	0.00142701	C02 - CD4+ Th : GPR183 ADT-CD49fhi	PSMC5
DENND1B	4.06644e-08	-0.258811	0.096	0.171	0.00183758	C02 - CD4+ Th : GPR183 ADT-CD49fhi	DENND1B
WDR1	4.22903e-08	-0.284218	0.215	0.295	0.00191106	C02 - CD4+ Th : GPR183 ADT-CD49fhi	WDR1
ETFB	4.55242e-08	-0.270968	0.188	0.267	0.00205719	C02 - CD4+ Th : GPR183 ADT-CD49fhi	ETFB
UBE2L3	4.55763e-08	-0.263048	0.321	0.386	0.00205955	C02 - CD4+ Th : GPR183 ADT-CD49fhi	UBE2L3
AHNAK	4.78183e-08	0.294855	0.669	0.57	0.00216086	C02 - CD4+ Th : GPR183 ADT-CD49fhi	AHNAK
NAA50	5.1824e-08	-0.290814	0.174	0.254	0.00234187	C02 - CD4+ Th : GPR183 ADT-CD49fhi	NAA50
NDUFS8	5.319e-08	-0.273077	0.212	0.294	0.00240361	C02 - CD4+ Th : GPR183 ADT-CD49fhi	NDUFS8
SUMF2	5.57024e-08	-0.259131	0.104	0.173	0.00251714	C02 - CD4+ Th : GPR183 ADT-CD49fhi	SUMF2
ACADVL	5.6064e-08	-0.289178	0.164	0.249	0.00253347	C02 - CD4+ Th : GPR183 ADT-CD49fhi	ACADVL
DOK2	6.06008e-08	-0.261094	0.364	0.394	0.00273849	C02 - CD4+ Th : GPR183 ADT-CD49fhi	DOK2
UPF2	6.71321e-08	-0.296482	0.14	0.213	0.00303363	C02 - CD4+ Th : GPR183 ADT-CD49fhi	UPF2
SEC11C	7.19771e-08	-0.266502	0.28	0.335	0.00325257	C02 - CD4+ Th : GPR183 ADT-CD49fhi	SEC11C
NDUFA3	7.24833e-08	-0.279988	0.271	0.346	0.00327545	C02 - CD4+ Th : GPR183 ADT-CD49fhi	NDUFA3
EED	7.30544e-08	-0.250387	0.097	0.17	0.00330125	C02 - CD4+ Th : GPR183 ADT-CD49fhi	EED
GRK2	7.36256e-08	-0.276347	0.104	0.175	0.00332707	C02 - CD4+ Th : GPR183 ADT-CD49fhi	GRK2
ZBTB38.1	7.55578e-08	-0.329189	0.16	0.228	0.00341438	C02 - CD4+ Th : GPR183 ADT-CD49fhi	ZBTB38
METRNL.1	7.69539e-08	-0.355734	0.376	0.386	0.00347747	C02 - CD4+ Th : GPR183 ADT-CD49fhi	METRNL
SIT1	8.23242e-08	-0.2963	0.152	0.23	0.00372015	C02 - CD4+ Th : GPR183 ADT-CD49fhi	SIT1
HNRNPD	8.25769e-08	-0.255326	0.302	0.354	0.00373157	C02 - CD4+ Th : GPR183 ADT-CD49fhi	HNRNPD
HP1BP3	8.26646e-08	-0.281048	0.359	0.402	0.00373553	C02 - CD4+ Th : GPR183 ADT-CD49fhi	HP1BP3
BTG3	8.61967e-08	-0.324197	0.318	0.385	0.00389514	C02 - CD4+ Th : GPR183 ADT-CD49fhi	BTG3
PHACTR2	8.81464e-08	-0.297376	0.206	0.254	0.00398325	C02 - CD4+ Th : GPR183 ADT-CD49fhi	PHACTR2
SPCS2	9.00803e-08	-0.250865	0.457	0.507	0.00407064	C02 - CD4+ Th : GPR183 ADT-CD49fhi	SPCS2
RPS27L	9.25321e-08	-0.329733	0.415	0.452	0.00418143	C02 - CD4+ Th : GPR183 ADT-CD49fhi	RPS27L
ECH1	9.82992e-08	-0.283736	0.229	0.305	0.00444204	C02 - CD4+ Th : GPR183 ADT-CD49fhi	ECH1
NLRC5	1.02799e-07	-0.294082	0.134	0.21	0.00464537	C02 - CD4+ Th : GPR183 ADT-CD49fhi	NLRC5
SMC4	1.03918e-07	-0.318372	0.181	0.252	0.00469595	C02 - CD4+ Th : GPR183 ADT-CD49fhi	SMC4
TAP2	1.03926e-07	-0.253706	0.101	0.17	0.00469632	C02 - CD4+ Th : GPR183 ADT-CD49fhi	TAP2
GSDMD	1.12576e-07	-0.26438	0.172	0.256	0.00508721	C02 - CD4+ Th : GPR183 ADT-CD49fhi	GSDMD
TGOLN2	1.14833e-07	-0.302096	0.223	0.31	0.00518917	C02 - CD4+ Th : GPR183 ADT-CD49fhi	TGOLN2
FIS1	1.21805e-07	-0.262362	0.271	0.345	0.00550427	C02 - CD4+ Th : GPR183 ADT-CD49fhi	FIS1
ATP6V0B	1.21863e-07	-0.267468	0.301	0.379	0.00550685	C02 - CD4+ Th : GPR183 ADT-CD49fhi	ATP6V0B
RTF1	1.24543e-07	-0.274184	0.203	0.292	0.00562798	C02 - CD4+ Th : GPR183 ADT-CD49fhi	RTF1
LAMTOR1	1.29293e-07	-0.253257	0.186	0.27	0.00584262	C02 - CD4+ Th : GPR183 ADT-CD49fhi	LAMTOR1
TNFSF10	1.34787e-07	-0.366868	0.168	0.235	0.0060909	C02 - CD4+ Th : GPR183 ADT-CD49fhi	TNFSF10
GBP2.1	1.35464e-07	-0.269901	0.38	0.416	0.0061215	C02 - CD4+ Th : GPR183 ADT-CD49fhi	GBP2
LSM7	1.37763e-07	-0.270507	0.364	0.425	0.00622539	C02 - CD4+ Th : GPR183 ADT-CD49fhi	LSM7
TAPBP	1.40399e-07	-0.268826	0.439	0.48	0.0063445	C02 - CD4+ Th : GPR183 ADT-CD49fhi	TAPBP
RAB11FIP1.1	1.42861e-07	-0.356388	0.271	0.342	0.00645575	C02 - CD4+ Th : GPR183 ADT-CD49fhi	RAB11FIP1
ARGLU1	1.42979e-07	-0.287898	0.529	0.558	0.00646106	C02 - CD4+ Th : GPR183 ADT-CD49fhi	ARGLU1
TBL1XR1	1.48003e-07	-0.29883	0.192	0.268	0.00668809	C02 - CD4+ Th : GPR183 ADT-CD49fhi	TBL1XR1
PPP1R12A	1.53505e-07	-0.282318	0.364	0.438	0.00693674	C02 - CD4+ Th : GPR183 ADT-CD49fhi	PPP1R12A
FAM3C	1.6243e-07	-0.250466	0.082	0.146	0.00734006	C02 - CD4+ Th : GPR183 ADT-CD49fhi	FAM3C
NUCB2.1	1.66964e-07	-0.30348	0.134	0.203	0.00754495	C02 - CD4+ Th : GPR183 ADT-CD49fhi	NUCB2
CBX3	1.72814e-07	-0.29034	0.33	0.398	0.00780927	C02 - CD4+ Th : GPR183 ADT-CD49fhi	CBX3
POLR2J3.1	1.73022e-07	-0.299079	0.09	0.159	0.00781871	C02 - CD4+ Th : GPR183 ADT-CD49fhi	POLR2J3.1
BAX	1.73172e-07	-0.325781	0.336	0.413	0.00782547	C02 - CD4+ Th : GPR183 ADT-CD49fhi	BAX
PFDN2	1.84161e-07	-0.275809	0.244	0.327	0.00832205	C02 - CD4+ Th : GPR183 ADT-CD49fhi	PFDN2
LAT	1.97587e-07	-0.268783	0.394	0.444	0.00892877	C02 - CD4+ Th : GPR183 ADT-CD49fhi	LAT
IGKC.1	2.0099e-07	-0.481632	0.393	0.322	0.00908252	C02 - CD4+ Th : GPR183 ADT-CD49fhi	IGKC
JUN.1	2.08045e-07	-0.25096	0.902	0.841	0.00940136	C02 - CD4+ Th : GPR183 ADT-CD49fhi	JUN
ARAP2	2.31696e-07	-0.329922	0.249	0.322	0.0104701	C02 - CD4+ Th : GPR183 ADT-CD49fhi	ARAP2
ATP6V1F	2.73187e-07	-0.254975	0.294	0.371	0.012345	C02 - CD4+ Th : GPR183 ADT-CD49fhi	ATP6V1F
AP2M1	2.86494e-07	-0.264495	0.261	0.346	0.0129464	C02 - CD4+ Th : GPR183 ADT-CD49fhi	AP2M1
SMIM7	2.87902e-07	-0.256689	0.119	0.19	0.01301	C02 - CD4+ Th : GPR183 ADT-CD49fhi	SMIM7
TRIR	2.90721e-07	-0.319835	0.26	0.337	0.0131374	C02 - CD4+ Th : GPR183 ADT-CD49fhi	TRIR
DDHD1	3.18861e-07	-0.291166	0.159	0.226	0.014409	C02 - CD4+ Th : GPR183 ADT-CD49fhi	DDHD1
C19orf66	3.28531e-07	-0.284343	0.15	0.228	0.014846	C02 - CD4+ Th : GPR183 ADT-CD49fhi	C19orf66
DAZAP2	3.3091e-07	-0.256567	0.54	0.55	0.0149535	C02 - CD4+ Th : GPR183 ADT-CD49fhi	DAZAP2
COPS9	3.53054e-07	-0.268054	0.145	0.217	0.0159541	C02 - CD4+ Th : GPR183 ADT-CD49fhi	COPS9
MIS18BP1	3.86066e-07	-0.289209	0.134	0.208	0.0174459	C02 - CD4+ Th : GPR183 ADT-CD49fhi	MIS18BP1
CHMP5	4.14795e-07	-0.264084	0.251	0.33	0.0187442	C02 - CD4+ Th : GPR183 ADT-CD49fhi	CHMP5
SP100.1	4.21319e-07	-0.280355	0.453	0.505	0.019039	C02 - CD4+ Th : GPR183 ADT-CD49fhi	SP100
DR1	4.26497e-07	-0.260715	0.162	0.239	0.019273	C02 - CD4+ Th : GPR183 ADT-CD49fhi	DR1
SLC5A3	4.63839e-07	-0.33921	0.271	0.351	0.0209604	C02 - CD4+ Th : GPR183 ADT-CD49fhi	SLC5A3
PDCD1	6.56815e-07	-0.293494	0.074	0.132	0.0296808	C02 - CD4+ Th : GPR183 ADT-CD49fhi	PDCD1
NKTR	6.84515e-07	-0.287439	0.477	0.494	0.0309325	C02 - CD4+ Th : GPR183 ADT-CD49fhi	NKTR
RICTOR	6.94246e-07	-0.300184	0.154	0.219	0.0313723	C02 - CD4+ Th : GPR183 ADT-CD49fhi	RICTOR
REEP5	7.57713e-07	-0.262981	0.398	0.46	0.0342403	C02 - CD4+ Th : GPR183 ADT-CD49fhi	REEP5
SLA	7.84317e-07	-0.323891	0.381	0.469	0.0354425	C02 - CD4+ Th : GPR183 ADT-CD49fhi	SLA
SRSF11.1	8.51175e-07	-0.254918	0.486	0.521	0.0384638	C02 - CD4+ Th : GPR183 ADT-CD49fhi	SRSF11
SELENOW	8.82985e-07	-0.276719	0.15	0.227	0.0399012	C02 - CD4+ Th : GPR183 ADT-CD49fhi	SELENOW
ARHGAP30	9.2925e-07	-0.275419	0.173	0.246	0.0419919	C02 - CD4+ Th : GPR183 ADT-CD49fhi	ARHGAP30
RASGRP1	9.39186e-07	-0.26161	0.251	0.301	0.0424409	C02 - CD4+ Th : GPR183 ADT-CD49fhi	RASGRP1
GALM	9.74167e-07	-0.276645	0.176	0.25	0.0440216	C02 - CD4+ Th : GPR183 ADT-CD49fhi	GALM
MX1	1.2145e-06	-0.348329	0.154	0.206	0.0548822	C02 - CD4+ Th : GPR183 ADT-CD49fhi	MX1
GNPTAB	1.24859e-06	-0.255655	0.104	0.166	0.0564227	C02 - CD4+ Th : GPR183 ADT-CD49fhi	GNPTAB
CNOT2	1.3003e-06	-0.290579	0.293	0.351	0.0587592	C02 - CD4+ Th : GPR183 ADT-CD49fhi	CNOT2
MYO1F	1.32232e-06	-0.275795	0.157	0.224	0.0597542	C02 - CD4+ Th : GPR183 ADT-CD49fhi	MYO1F
PGLS	1.36112e-06	-0.255776	0.201	0.27	0.0615077	C02 - CD4+ Th : GPR183 ADT-CD49fhi	PGLS
SCAND1	1.40094e-06	-0.267815	0.295	0.356	0.0633072	C02 - CD4+ Th : GPR183 ADT-CD49fhi	SCAND1
SCP2	1.52003e-06	-0.252105	0.265	0.328	0.0686885	C02 - CD4+ Th : GPR183 ADT-CD49fhi	SCP2
RNF115	1.63181e-06	-0.258206	0.148	0.221	0.0737399	C02 - CD4+ Th : GPR183 ADT-CD49fhi	RNF115
TMEM230	1.66861e-06	-0.274555	0.268	0.33	0.0754027	C02 - CD4+ Th : GPR183 ADT-CD49fhi	TMEM230
PHPT1	1.68216e-06	-0.265893	0.273	0.356	0.0760152	C02 - CD4+ Th : GPR183 ADT-CD49fhi	PHPT1
KRT10	1.6944e-06	-0.250598	0.369	0.419	0.0765682	C02 - CD4+ Th : GPR183 ADT-CD49fhi	KRT10
ID3.1	1.69986e-06	-0.508528	0.194	0.252	0.0768148	C02 - CD4+ Th : GPR183 ADT-CD49fhi	ID3
ANAPC11	1.71925e-06	-0.252001	0.239	0.295	0.0776913	C02 - CD4+ Th : GPR183 ADT-CD49fhi	ANAPC11
SYNE1	1.77203e-06	-0.294615	0.146	0.197	0.0800763	C02 - CD4+ Th : GPR183 ADT-CD49fhi	SYNE1
GOLGA8B	1.91736e-06	-0.287971	0.135	0.184	0.0866435	C02 - CD4+ Th : GPR183 ADT-CD49fhi	GOLGA8B
ATRX.1	1.92145e-06	-0.260317	0.468	0.496	0.0868284	C02 - CD4+ Th : GPR183 ADT-CD49fhi	ATRX
SMG1.1	2.06249e-06	-0.257069	0.333	0.38	0.0932017	C02 - CD4+ Th : GPR183 ADT-CD49fhi	SMG1
TCIRG1	2.17586e-06	-0.265985	0.169	0.237	0.0983248	C02 - CD4+ Th : GPR183 ADT-CD49fhi	TCIRG1
MIAT.1	2.21137e-06	-0.318684	0.157	0.214	0.0999295	C02 - CD4+ Th : GPR183 ADT-CD49fhi	MIAT
PGAP1	2.32624e-06	0.25812	0.197	0.129	0.105121	C02 - CD4+ Th : GPR183 ADT-CD49fhi	PGAP1
IER2.1	2.34511e-06	-0.290263	0.804	0.774	0.105973	C02 - CD4+ Th : GPR183 ADT-CD49fhi	IER2
SMS	2.59497e-06	-0.251398	0.144	0.208	0.117264	C02 - CD4+ Th : GPR183 ADT-CD49fhi	SMS
SAMD9	2.93935e-06	-0.321339	0.231	0.293	0.132826	C02 - CD4+ Th : GPR183 ADT-CD49fhi	SAMD9
NAP1L4	2.94039e-06	-0.277976	0.299	0.373	0.132873	C02 - CD4+ Th : GPR183 ADT-CD49fhi	NAP1L4
POU3F1.1	3.16442e-06	-0.286381	0.077	0.12	0.142997	C02 - CD4+ Th : GPR183 ADT-CD49fhi	POU3F1
FMNL1	3.23582e-06	-0.251371	0.364	0.414	0.146224	C02 - CD4+ Th : GPR183 ADT-CD49fhi	FMNL1
ARHGAP9.1	3.25712e-06	-0.252907	0.306	0.343	0.147186	C02 - CD4+ Th : GPR183 ADT-CD49fhi	ARHGAP9
EIF2AK2	3.45508e-06	-0.282787	0.173	0.241	0.156132	C02 - CD4+ Th : GPR183 ADT-CD49fhi	EIF2AK2
PTTG1.1	3.51014e-06	-0.274752	0.193	0.253	0.15862	C02 - CD4+ Th : GPR183 ADT-CD49fhi	PTTG1
ANXA5	4.30109e-06	-0.261505	0.356	0.407	0.194362	C02 - CD4+ Th : GPR183 ADT-CD49fhi	ANXA5
RBCK1	4.41026e-06	-0.250235	0.235	0.302	0.199295	C02 - CD4+ Th : GPR183 ADT-CD49fhi	RBCK1
CD164	4.50937e-06	-0.265289	0.364	0.424	0.203774	C02 - CD4+ Th : GPR183 ADT-CD49fhi	CD164
REX1BD	4.56628e-06	-0.265975	0.163	0.233	0.206345	C02 - CD4+ Th : GPR183 ADT-CD49fhi	REX1BD
DCP2	5.3159e-06	-0.267683	0.141	0.203	0.24022	C02 - CD4+ Th : GPR183 ADT-CD49fhi	DCP2
LCP2	6.43289e-06	-0.265132	0.199	0.263	0.290696	C02 - CD4+ Th : GPR183 ADT-CD49fhi	LCP2
NSD3.1	6.45279e-06	-0.292605	0.174	0.249	0.291595	C02 - CD4+ Th : GPR183 ADT-CD49fhi	NSD3
GIMAP4	9.11697e-06	-0.308753	0.231	0.289	0.411987	C02 - CD4+ Th : GPR183 ADT-CD49fhi	GIMAP4
GOLGA8A	9.12319e-06	-0.265288	0.122	0.169	0.412268	C02 - CD4+ Th : GPR183 ADT-CD49fhi	GOLGA8A
SMC3	1.01469e-05	-0.250352	0.17	0.239	0.458528	C02 - CD4+ Th : GPR183 ADT-CD49fhi	SMC3
AC004687.1	1.01505e-05	-0.258444	0.083	0.14	0.458689	C02 - CD4+ Th : GPR183 ADT-CD49fhi	AC004687.1
IPCEF1	1.08439e-05	-0.291384	0.129	0.18	0.490025	C02 - CD4+ Th : GPR183 ADT-CD49fhi	IPCEF1
SLF1	1.20661e-05	-0.265174	0.12	0.182	0.545257	C02 - CD4+ Th : GPR183 ADT-CD49fhi	SLF1
ZRANB2	1.21534e-05	-0.262369	0.225	0.299	0.549201	C02 - CD4+ Th : GPR183 ADT-CD49fhi	ZRANB2
STAT1	1.23154e-05	-0.283523	0.336	0.369	0.556521	C02 - CD4+ Th : GPR183 ADT-CD49fhi	STAT1
MAP3K8	1.29958e-05	-0.259527	0.135	0.199	0.587269	C02 - CD4+ Th : GPR183 ADT-CD49fhi	MAP3K8
LENG8	1.93063e-05	-0.270205	0.15	0.204	0.87243	C02 - CD4+ Th : GPR183 ADT-CD49fhi	LENG8
BOD1L1	2.44412e-05	-0.252961	0.333	0.374	1	C02 - CD4+ Th : GPR183 ADT-CD49fhi	BOD1L1
DDX46	2.70292e-05	-0.251542	0.275	0.338	1	C02 - CD4+ Th : GPR183 ADT-CD49fhi	DDX46
ARRDC3	3.33077e-05	-0.266328	0.169	0.211	1	C02 - CD4+ Th : GPR183 ADT-CD49fhi	ARRDC3
MRPS6.1	3.85075e-05	-0.262716	0.335	0.401	1	C02 - CD4+ Th : GPR183 ADT-CD49fhi	MRPS6
MDM4	4.94853e-05	-0.254052	0.153	0.211	1	C02 - CD4+ Th : GPR183 ADT-CD49fhi	MDM4
CEMIP2	5.13185e-05	-0.312853	0.138	0.196	1	C02 - CD4+ Th : GPR183 ADT-CD49fhi	CEMIP2
GBP1	7.55209e-05	-0.2518	0.165	0.223	1	C02 - CD4+ Th : GPR183 ADT-CD49fhi	GBP1
LDLRAD4.1	7.6548e-05	-0.370019	0.225	0.291	1	C02 - CD4+ Th : GPR183 ADT-CD49fhi	LDLRAD4
ARID1B	8.70254e-05	-0.261939	0.218	0.281	1	C02 - CD4+ Th : GPR183 ADT-CD49fhi	ARID1B
PPP1R14B.1	9.37475e-05	-0.278307	0.266	0.309	1	C02 - CD4+ Th : GPR183 ADT-CD49fhi	PPP1R14B
STMN1.1	0.000150188	-0.387425	0.244	0.242	1	C02 - CD4+ Th : GPR183 ADT-CD49fhi	STMN1
IER5L.1	0.000296507	-0.303691	0.316	0.369	1	C02 - CD4+ Th : GPR183 ADT-CD49fhi	IER5L
GADD45A.1	0.000547575	-0.277852	0.403	0.391	1	C02 - CD4+ Th : GPR183 ADT-CD49fhi	GADD45A
IER3.1	0.00104292	-0.302915	0.196	0.207	1	C02 - CD4+ Th : GPR183 ADT-CD49fhi	IER3
NMB.1	0.00109934	-0.473028	0.086	0.113	1	C02 - CD4+ Th : GPR183 ADT-CD49fhi	NMB
GABPB1-AS1	0.00375847	-0.2526	0.188	0.236	1	C02 - CD4+ Th : GPR183 ADT-CD49fhi	GABPB1-AS1
AC020916.1	0.00475656	-0.294739	0.159	0.202	1	C02 - CD4+ Th : GPR183 ADT-CD49fhi	AC020916.1
IGHG4.1	0.0050082	-0.282599	0.134	0.138	1	C02 - CD4+ Th : GPR183 ADT-CD49fhi	IGHG4
GZMK.2	1.65556e-222	1.84401	0.879	0.337	7.4813e-218	C03 - CD8+ CTL : GZMK ADT-NKG2Dhi	GZMK
CCL4.2	5.37451e-210	2.14737	0.882	0.352	2.42869e-205	C03 - CD8+ CTL : GZMK ADT-NKG2Dhi	CCL4
CD8A.2	9.4723e-185	1.59492	0.722	0.189	4.28044e-180	C03 - CD8+ CTL : GZMK ADT-NKG2Dhi	CD8A
CCL5.2	1.00746e-179	1.31134	0.98	0.579	4.55263e-175	C03 - CD8+ CTL : GZMK ADT-NKG2Dhi	CCL5
NKG7.2	4.27781e-169	1.29781	0.85	0.322	1.9331e-164	C03 - CD8+ CTL : GZMK ADT-NKG2Dhi	NKG7
CD8B.2	3.68207e-135	1.34365	0.596	0.159	1.66389e-130	C03 - CD8+ CTL : GZMK ADT-NKG2Dhi	CD8B
GZMA.2	2.84462e-126	1.21502	0.853	0.415	1.28545e-121	C03 - CD8+ CTL : GZMK ADT-NKG2Dhi	GZMA
CST7.2	1.60309e-119	1.18376	0.817	0.476	7.2442e-115	C03 - CD8+ CTL : GZMK ADT-NKG2Dhi	CST7
CRTAM.2	1.53338e-100	1.33446	0.455	0.113	6.92921e-96	C03 - CD8+ CTL : GZMK ADT-NKG2Dhi	CRTAM
TNFRSF18.2	2.17597e-94	-1.64646	0.014	0.325	9.833e-90	C03 - CD8+ CTL : GZMK ADT-NKG2Dhi	TNFRSF18
CCL4L2.2	4.2772e-91	2.18234	0.472	0.164	1.93282e-86	C03 - CD8+ CTL : GZMK ADT-NKG2Dhi	CCL4L2
TNFSF9.2	8.24207e-88	1.4875	0.491	0.189	3.72451e-83	C03 - CD8+ CTL : GZMK ADT-NKG2Dhi	TNFSF9
ITM2C.2	2.54218e-86	1.15269	0.508	0.197	1.14879e-81	C03 - CD8+ CTL : GZMK ADT-NKG2Dhi	ITM2C
LTB.1	1.30173e-80	-1.48084	0.353	0.694	5.88237e-76	C03 - CD8+ CTL : GZMK ADT-NKG2Dhi	LTB
IFNG.2	4.70452e-75	1.69473	0.594	0.289	2.12592e-70	C03 - CD8+ CTL : GZMK ADT-NKG2Dhi	IFNG
GZMH.2	3.51506e-68	1.27626	0.409	0.137	1.58842e-63	C03 - CD8+ CTL : GZMK ADT-NKG2Dhi	GZMH
TNFRSF4.2	2.02144e-67	-1.5023	0.017	0.261	9.13467e-63	C03 - CD8+ CTL : GZMK ADT-NKG2Dhi	TNFRSF4
GZMM.1	6.89835e-65	0.837633	0.63	0.393	3.11729e-60	C03 - CD8+ CTL : GZMK ADT-NKG2Dhi	GZMM
YBX3.2	6.09944e-63	1.03726	0.335	0.105	2.75627e-58	C03 - CD8+ CTL : GZMK ADT-NKG2Dhi	YBX3
HLA-DPB1.2	4.077e-61	0.828347	0.728	0.526	1.84236e-56	C03 - CD8+ CTL : GZMK ADT-NKG2Dhi	HLA-DPB1
SRSF7.1	3.16945e-46	0.58183	0.94	0.926	1.43224e-41	C03 - CD8+ CTL : GZMK ADT-NKG2Dhi	SRSF7
TUBA4A.1	1.03917e-45	0.850712	0.706	0.56	4.69591e-41	C03 - CD8+ CTL : GZMK ADT-NKG2Dhi	TUBA4A
CMC1.2	2.22211e-44	0.86313	0.391	0.221	1.00415e-39	C03 - CD8+ CTL : GZMK ADT-NKG2Dhi	CMC1
KLRG1.1	1.12571e-43	0.765478	0.304	0.107	5.08696e-39	C03 - CD8+ CTL : GZMK ADT-NKG2Dhi	KLRG1
CD4	1.03817e-42	-0.604969	0.032	0.221	4.69139e-38	C03 - CD8+ CTL : GZMK ADT-NKG2Dhi	CD4
IRS2.1	1.56035e-40	-0.676349	0.073	0.286	7.05108e-36	C03 - CD8+ CTL : GZMK ADT-NKG2Dhi	IRS2
CTLA4.2	4.28333e-40	-1.10108	0.085	0.301	1.93559e-35	C03 - CD8+ CTL : GZMK ADT-NKG2Dhi	CTLA4
CCL3L3.2	4.57393e-40	0.986049	0.273	0.094	2.06692e-35	C03 - CD8+ CTL : GZMK ADT-NKG2Dhi	CCL3L3
COTL1.1	1.69269e-39	0.635567	0.764	0.641	7.64911e-35	C03 - CD8+ CTL : GZMK ADT-NKG2Dhi	COTL1
ZEB2.2	1.78911e-39	0.785219	0.489	0.256	8.0848e-35	C03 - CD8+ CTL : GZMK ADT-NKG2Dhi	ZEB2
TNFRSF25.1	2.05157e-39	-0.667591	0.083	0.298	9.27086e-35	C03 - CD8+ CTL : GZMK ADT-NKG2Dhi	TNFRSF25
DUSP2.2	2.39055e-39	0.679767	0.881	0.783	1.08026e-34	C03 - CD8+ CTL : GZMK ADT-NKG2Dhi	DUSP2
SRSF2	4.29456e-36	0.53715	0.895	0.822	1.94067e-31	C03 - CD8+ CTL : GZMK ADT-NKG2Dhi	SRSF2
CD40LG.2	7.89164e-36	-0.825228	0.037	0.208	3.56615e-31	C03 - CD8+ CTL : GZMK ADT-NKG2Dhi	CD40LG
SLA.1	1.93614e-35	0.797579	0.563	0.449	8.7492e-31	C03 - CD8+ CTL : GZMK ADT-NKG2Dhi	SLA
TSHZ2	3.63818e-35	-0.722586	0.019	0.169	1.64406e-30	C03 - CD8+ CTL : GZMK ADT-NKG2Dhi	TSHZ2
PHLDA1.1	6.25361e-35	-0.828935	0.256	0.493	2.82594e-30	C03 - CD8+ CTL : GZMK ADT-NKG2Dhi	PHLDA1
LAG3.2	1.39533e-34	0.60367	0.365	0.16	6.30534e-30	C03 - CD8+ CTL : GZMK ADT-NKG2Dhi	LAG3
CLEC2B.1	1.64144e-34	0.779772	0.685	0.489	7.41752e-30	C03 - CD8+ CTL : GZMK ADT-NKG2Dhi	CLEC2B
HLA-DPA1.2	3.12415e-34	0.621728	0.678	0.525	1.41177e-29	C03 - CD8+ CTL : GZMK ADT-NKG2Dhi	HLA-DPA1
KLRB1.1	7.39414e-34	-0.831493	0.099	0.3	3.34134e-29	C03 - CD8+ CTL : GZMK ADT-NKG2Dhi	KLRB1
HLA-DRB1.2	1.41788e-32	0.689372	0.711	0.511	6.40726e-28	C03 - CD8+ CTL : GZMK ADT-NKG2Dhi	HLA-DRB1
GNA15	1.76335e-32	-0.401312	0.004	0.122	7.96841e-28	C03 - CD8+ CTL : GZMK ADT-NKG2Dhi	GNA15
GK.2	2.26314e-32	-0.740272	0.019	0.156	1.02269e-27	C03 - CD8+ CTL : GZMK ADT-NKG2Dhi	GK
FOXP3.2	1.86748e-31	-0.513944	0.001	0.109	8.43897e-27	C03 - CD8+ CTL : GZMK ADT-NKG2Dhi	FOXP3
NR4A2	5.89271e-31	0.56788	0.859	0.727	2.66285e-26	C03 - CD8+ CTL : GZMK ADT-NKG2Dhi	NR4A2
SNX9.1	1.80335e-30	-0.587228	0.072	0.248	8.14914e-26	C03 - CD8+ CTL : GZMK ADT-NKG2Dhi	SNX9
TMEM173	6.02311e-30	-0.567134	0.117	0.311	2.72178e-25	C03 - CD8+ CTL : GZMK ADT-NKG2Dhi	TMEM173
BATF.2	4.94067e-29	-1.00523	0.176	0.366	2.23264e-24	C03 - CD8+ CTL : GZMK ADT-NKG2Dhi	BATF
RAB11FIP1.2	7.83841e-29	-0.711696	0.155	0.353	3.5421e-24	C03 - CD8+ CTL : GZMK ADT-NKG2Dhi	RAB11FIP1
IL7R.2	1.01303e-28	-0.733263	0.502	0.703	4.57777e-24	C03 - CD8+ CTL : GZMK ADT-NKG2Dhi	IL7R
GEM.2	1.04086e-28	-0.731342	0.029	0.168	4.70354e-24	C03 - CD8+ CTL : GZMK ADT-NKG2Dhi	GEM
RPL22.2	1.30638e-28	-0.436184	0.879	0.932	5.90341e-24	C03 - CD8+ CTL : GZMK ADT-NKG2Dhi	RPL22
IL2RA.2	1.33909e-28	-0.764992	0.013	0.13	6.0512e-24	C03 - CD8+ CTL : GZMK ADT-NKG2Dhi	IL2RA
CCR6.1	2.82136e-28	-0.61088	0.014	0.135	1.27494e-23	C03 - CD8+ CTL : GZMK ADT-NKG2Dhi	CCR6
TNF	1.22542e-27	1.02704	0.39	0.264	5.53757e-23	C03 - CD8+ CTL : GZMK ADT-NKG2Dhi	TNF
JMJD6	2.91879e-27	0.538057	0.427	0.289	1.31897e-22	C03 - CD8+ CTL : GZMK ADT-NKG2Dhi	JMJD6
LYAR	8.30296e-27	0.569799	0.453	0.279	3.75203e-22	C03 - CD8+ CTL : GZMK ADT-NKG2Dhi	LYAR
S100A4.2	1.15019e-26	-0.660214	0.783	0.879	5.19761e-22	C03 - CD8+ CTL : GZMK ADT-NKG2Dhi	S100A4
AOAH.2	2.21436e-26	0.478015	0.232	0.089	1.00065e-21	C03 - CD8+ CTL : GZMK ADT-NKG2Dhi	AOAH
DNPH1.2	9.7851e-26	-0.525842	0.115	0.292	4.42179e-21	C03 - CD8+ CTL : GZMK ADT-NKG2Dhi	DNPH1
TIMP1.1	1.15043e-25	-0.481367	0.101	0.271	5.19867e-21	C03 - CD8+ CTL : GZMK ADT-NKG2Dhi	TIMP1
LAIR2.2	1.21519e-25	-0.471201	0.007	0.108	5.49133e-21	C03 - CD8+ CTL : GZMK ADT-NKG2Dhi	LAIR2
CLDND1	1.61203e-25	0.393087	0.368	0.367	7.2846e-21	C03 - CD8+ CTL : GZMK ADT-NKG2Dhi	CLDND1
H3F3B	2.33069e-25	0.37654	0.991	0.987	1.05321e-20	C03 - CD8+ CTL : GZMK ADT-NKG2Dhi	H3F3B
MAL	3.51761e-25	-0.400319	0.012	0.117	1.58957e-20	C03 - CD8+ CTL : GZMK ADT-NKG2Dhi	MAL
FXYD5.2	4.91111e-25	-0.478363	0.529	0.715	2.21928e-20	C03 - CD8+ CTL : GZMK ADT-NKG2Dhi	FXYD5
STAM.1	7.44178e-25	-0.458878	0.036	0.167	3.36286e-20	C03 - CD8+ CTL : GZMK ADT-NKG2Dhi	STAM
SH2D1A.2	3.65115e-24	0.527722	0.386	0.287	1.64992e-19	C03 - CD8+ CTL : GZMK ADT-NKG2Dhi	SH2D1A
MAST4	3.72268e-24	-0.365733	0.013	0.118	1.68224e-19	C03 - CD8+ CTL : GZMK ADT-NKG2Dhi	MAST4
PHTF2	1.09566e-23	-0.407595	0.063	0.208	4.95118e-19	C03 - CD8+ CTL : GZMK ADT-NKG2Dhi	PHTF2
CD81	1.09669e-23	0.43428	0.708	0.611	4.95581e-19	C03 - CD8+ CTL : GZMK ADT-NKG2Dhi	CD81
RNF19A	1.4154e-23	0.516406	0.636	0.536	6.39606e-19	C03 - CD8+ CTL : GZMK ADT-NKG2Dhi	RNF19A
SLAMF7	1.98824e-23	0.410153	0.173	0.059	8.98465e-19	C03 - CD8+ CTL : GZMK ADT-NKG2Dhi	SLAMF7
NFKBIA	3.09856e-23	-0.657556	0.659	0.801	1.40021e-18	C03 - CD8+ CTL : GZMK ADT-NKG2Dhi	NFKBIA
GYG1	4.35059e-23	0.433622	0.243	0.157	1.96599e-18	C03 - CD8+ CTL : GZMK ADT-NKG2Dhi	GYG1
HCST.2	5.44924e-23	0.480148	0.843	0.752	2.46246e-18	C03 - CD8+ CTL : GZMK ADT-NKG2Dhi	HCST
HLA-DQA1.2	1.14497e-22	0.647478	0.427	0.259	5.17402e-18	C03 - CD8+ CTL : GZMK ADT-NKG2Dhi	HLA-DQA1
P2RY10	2.94584e-22	-0.473471	0.132	0.299	1.3312e-17	C03 - CD8+ CTL : GZMK ADT-NKG2Dhi	P2RY10
SPOCK2	4.99733e-22	-0.509888	0.376	0.567	2.25824e-17	C03 - CD8+ CTL : GZMK ADT-NKG2Dhi	SPOCK2
LITAF.1	6.49969e-22	0.482041	0.541	0.47	2.93715e-17	C03 - CD8+ CTL : GZMK ADT-NKG2Dhi	LITAF
PPP1R14B.2	6.59786e-22	0.566346	0.396	0.295	2.98151e-17	C03 - CD8+ CTL : GZMK ADT-NKG2Dhi	PPP1R14B
TAGAP	7.75888e-22	0.535598	0.655	0.567	3.50616e-17	C03 - CD8+ CTL : GZMK ADT-NKG2Dhi	TAGAP
APOBEC3G.2	9.09935e-22	0.525017	0.609	0.449	4.1119e-17	C03 - CD8+ CTL : GZMK ADT-NKG2Dhi	APOBEC3G
TRGC2.2	9.83636e-22	0.622597	0.348	0.188	4.44495e-17	C03 - CD8+ CTL : GZMK ADT-NKG2Dhi	TRGC2
HLA-DQB1.2	3.29427e-21	0.553404	0.407	0.302	1.48865e-16	C03 - CD8+ CTL : GZMK ADT-NKG2Dhi	HLA-DQB1
PIK3R1	3.52196e-21	0.548404	0.496	0.419	1.59154e-16	C03 - CD8+ CTL : GZMK ADT-NKG2Dhi	PIK3R1
S100A11.2	4.41701e-21	-0.55481	0.55	0.709	1.996e-16	C03 - CD8+ CTL : GZMK ADT-NKG2Dhi	S100A11
AC133644.2.2	4.53373e-21	-0.426403	0.016	0.114	2.04875e-16	C03 - CD8+ CTL : GZMK ADT-NKG2Dhi	AC133644.2
RTKN2.2	5.59765e-21	-0.545309	0.017	0.116	2.52952e-16	C03 - CD8+ CTL : GZMK ADT-NKG2Dhi	RTKN2
AMD1.1	9.23647e-21	0.366163	0.676	0.665	4.17387e-16	C03 - CD8+ CTL : GZMK ADT-NKG2Dhi	AMD1
SAMD3.2	1.08634e-20	0.477967	0.376	0.22	4.90905e-16	C03 - CD8+ CTL : GZMK ADT-NKG2Dhi	SAMD3
ZC3H12D	3.57841e-20	-0.458523	0.091	0.234	1.61705e-15	C03 - CD8+ CTL : GZMK ADT-NKG2Dhi	ZC3H12D
MAGEH1.2	3.90096e-20	-0.503223	0.014	0.106	1.76281e-15	C03 - CD8+ CTL : GZMK ADT-NKG2Dhi	MAGEH1
MAF.1	8.34874e-20	-0.637502	0.142	0.297	3.77271e-15	C03 - CD8+ CTL : GZMK ADT-NKG2Dhi	MAF
HLA-DRA.2	9.63742e-20	0.550116	0.541	0.405	4.35505e-15	C03 - CD8+ CTL : GZMK ADT-NKG2Dhi	HLA-DRA
LIMS1	1.24358e-19	-0.399454	0.18	0.344	5.61961e-15	C03 - CD8+ CTL : GZMK ADT-NKG2Dhi	LIMS1
ARID5B	1.34252e-19	-0.652176	0.401	0.571	6.06671e-15	C03 - CD8+ CTL : GZMK ADT-NKG2Dhi	ARID5B
EOMES	3.88198e-19	0.434334	0.174	0.067	1.75423e-14	C03 - CD8+ CTL : GZMK ADT-NKG2Dhi	EOMES
NCF4	4.15302e-19	-0.305293	0.024	0.124	1.87671e-14	C03 - CD8+ CTL : GZMK ADT-NKG2Dhi	NCF4
RAB8B	8.93557e-19	0.277656	0.321	0.32	4.03789e-14	C03 - CD8+ CTL : GZMK ADT-NKG2Dhi	RAB8B
C12orf75.1	1.22224e-18	0.470343	0.41	0.3	5.52319e-14	C03 - CD8+ CTL : GZMK ADT-NKG2Dhi	C12orf75
EGR2	2.58477e-18	0.599023	0.227	0.132	1.16803e-13	C03 - CD8+ CTL : GZMK ADT-NKG2Dhi	EGR2
TPT1.2	3.96374e-18	-0.360438	0.991	0.992	1.79118e-13	C03 - CD8+ CTL : GZMK ADT-NKG2Dhi	TPT1
ITGB1	1.16585e-17	-0.399425	0.338	0.512	5.26834e-13	C03 - CD8+ CTL : GZMK ADT-NKG2Dhi	ITGB1
RNASET2.2	1.41108e-17	-0.352541	0.227	0.39	6.37652e-13	C03 - CD8+ CTL : GZMK ADT-NKG2Dhi	RNASET2
C16orf72	1.93294e-17	0.35856	0.334	0.27	8.73475e-13	C03 - CD8+ CTL : GZMK ADT-NKG2Dhi	C16orf72
TIAM1	2.04396e-17	-0.283672	0.017	0.103	9.23647e-13	C03 - CD8+ CTL : GZMK ADT-NKG2Dhi	TIAM1
BIRC3	2.51573e-17	-0.556606	0.498	0.657	1.13683e-12	C03 - CD8+ CTL : GZMK ADT-NKG2Dhi	BIRC3
MFHAS1	2.6693e-17	-0.30284	0.027	0.122	1.20623e-12	C03 - CD8+ CTL : GZMK ADT-NKG2Dhi	MFHAS1
DTHD1	2.99362e-17	0.38312	0.164	0.063	1.35279e-12	C03 - CD8+ CTL : GZMK ADT-NKG2Dhi	DTHD1
RUNX3.1	4.11343e-17	0.417022	0.606	0.518	1.85882e-12	C03 - CD8+ CTL : GZMK ADT-NKG2Dhi	RUNX3
GGA2	5.09309e-17	0.424971	0.23	0.13	2.30152e-12	C03 - CD8+ CTL : GZMK ADT-NKG2Dhi	GGA2
UBE2S.1	5.5611e-17	0.399275	0.81	0.773	2.51301e-12	C03 - CD8+ CTL : GZMK ADT-NKG2Dhi	UBE2S
TBC1D4.2	6.69295e-17	-0.519448	0.081	0.199	3.02448e-12	C03 - CD8+ CTL : GZMK ADT-NKG2Dhi	TBC1D4
SMARCD3	1.39014e-16	0.316113	0.102	0.031	6.28192e-12	C03 - CD8+ CTL : GZMK ADT-NKG2Dhi	SMARCD3
HSPB1.2	1.60284e-16	-0.52188	0.302	0.464	7.24309e-12	C03 - CD8+ CTL : GZMK ADT-NKG2Dhi	HSPB1
PTPRC.1	1.97593e-16	0.305078	0.928	0.915	8.92902e-12	C03 - CD8+ CTL : GZMK ADT-NKG2Dhi	PTPRC
APMAP.1	2.34466e-16	0.343111	0.26	0.191	1.05953e-11	C03 - CD8+ CTL : GZMK ADT-NKG2Dhi	APMAP
CMC2	2.65832e-16	0.317256	0.43	0.38	1.20127e-11	C03 - CD8+ CTL : GZMK ADT-NKG2Dhi	CMC2
ANP32B	3.0597e-16	-0.343156	0.388	0.556	1.38265e-11	C03 - CD8+ CTL : GZMK ADT-NKG2Dhi	ANP32B
HERPUD2	3.71499e-16	0.348853	0.351	0.282	1.67877e-11	C03 - CD8+ CTL : GZMK ADT-NKG2Dhi	HERPUD2
PPP2R5C	5.17124e-16	0.348913	0.754	0.685	2.33683e-11	C03 - CD8+ CTL : GZMK ADT-NKG2Dhi	PPP2R5C
IKZF2.2	5.31667e-16	-0.390219	0.045	0.146	2.40255e-11	C03 - CD8+ CTL : GZMK ADT-NKG2Dhi	IKZF2
GRASP.1	7.12872e-16	-0.354687	0.047	0.15	3.2214e-11	C03 - CD8+ CTL : GZMK ADT-NKG2Dhi	GRASP
THEM4	7.61415e-16	-0.349333	0.071	0.185	3.44076e-11	C03 - CD8+ CTL : GZMK ADT-NKG2Dhi	THEM4
NR4A3	7.66237e-16	0.495947	0.413	0.322	3.46255e-11	C03 - CD8+ CTL : GZMK ADT-NKG2Dhi	NR4A3
PLEK	1.05988e-15	0.339898	0.153	0.063	4.78947e-11	C03 - CD8+ CTL : GZMK ADT-NKG2Dhi	PLEK
XCL2.2	1.41183e-15	0.850496	0.312	0.182	6.37992e-11	C03 - CD8+ CTL : GZMK ADT-NKG2Dhi	XCL2
NINJ1	1.47645e-15	-0.314797	0.085	0.201	6.67195e-11	C03 - CD8+ CTL : GZMK ADT-NKG2Dhi	NINJ1
SDCBP.1	1.82554e-15	0.420345	0.682	0.629	8.24943e-11	C03 - CD8+ CTL : GZMK ADT-NKG2Dhi	SDCBP
SMAP2	2.30785e-15	-0.328678	0.317	0.476	1.04289e-10	C03 - CD8+ CTL : GZMK ADT-NKG2Dhi	SMAP2
SPATS2L.1	3.10659e-15	-0.265509	0.062	0.166	1.40384e-10	C03 - CD8+ CTL : GZMK ADT-NKG2Dhi	SPATS2L
RABAC1	3.48624e-15	0.314376	0.521	0.477	1.5754e-10	C03 - CD8+ CTL : GZMK ADT-NKG2Dhi	RABAC1
SAMSN1	4.74364e-15	-0.565708	0.527	0.655	2.14361e-10	C03 - CD8+ CTL : GZMK ADT-NKG2Dhi	SAMSN1
DUSP16	5.79401e-15	-0.368084	0.092	0.211	2.61826e-10	C03 - CD8+ CTL : GZMK ADT-NKG2Dhi	DUSP16
CD74.2	5.87106e-15	0.399553	0.787	0.701	2.65308e-10	C03 - CD8+ CTL : GZMK ADT-NKG2Dhi	CD74
UGP2.1	5.88678e-15	-0.432382	0.2	0.346	2.66018e-10	C03 - CD8+ CTL : GZMK ADT-NKG2Dhi	UGP2
NAA50.1	7.26282e-15	0.368124	0.329	0.237	3.28199e-10	C03 - CD8+ CTL : GZMK ADT-NKG2Dhi	NAA50
NFKBID	7.74598e-15	0.511643	0.355	0.262	3.50033e-10	C03 - CD8+ CTL : GZMK ADT-NKG2Dhi	NFKBID
HMGA1	7.89465e-15	0.278663	0.24	0.207	3.56751e-10	C03 - CD8+ CTL : GZMK ADT-NKG2Dhi	HMGA1
CD59	8.77251e-15	-0.278523	0.058	0.157	3.96421e-10	C03 - CD8+ CTL : GZMK ADT-NKG2Dhi	CD59
BCL2	9.92613e-15	-0.337976	0.144	0.276	4.48552e-10	C03 - CD8+ CTL : GZMK ADT-NKG2Dhi	BCL2
PELI1	1.01228e-14	-0.375856	0.082	0.196	4.57438e-10	C03 - CD8+ CTL : GZMK ADT-NKG2Dhi	PELI1
SESN3	1.49255e-14	-0.336058	0.043	0.138	6.74469e-10	C03 - CD8+ CTL : GZMK ADT-NKG2Dhi	SESN3
RPL12.2	1.65114e-14	-0.277032	0.965	0.973	7.46136e-10	C03 - CD8+ CTL : GZMK ADT-NKG2Dhi	RPL12
AKNA.2	2.9488e-14	0.397139	0.432	0.328	1.33253e-09	C03 - CD8+ CTL : GZMK ADT-NKG2Dhi	AKNA
CXCR4.1	2.98698e-14	0.378506	0.934	0.888	1.34979e-09	C03 - CD8+ CTL : GZMK ADT-NKG2Dhi	CXCR4
RPL37.2	3.45212e-14	-0.291412	0.955	0.976	1.55998e-09	C03 - CD8+ CTL : GZMK ADT-NKG2Dhi	RPL37
CCDC50.1	4.18546e-14	-0.313271	0.03	0.114	1.89137e-09	C03 - CD8+ CTL : GZMK ADT-NKG2Dhi	CCDC50
CMTM6	4.33788e-14	-0.316888	0.19	0.327	1.96025e-09	C03 - CD8+ CTL : GZMK ADT-NKG2Dhi	CMTM6
C1orf21	5.20922e-14	0.264766	0.111	0.038	2.35399e-09	C03 - CD8+ CTL : GZMK ADT-NKG2Dhi	C1orf21
PTMS.2	5.56196e-14	0.457084	0.332	0.226	2.51339e-09	C03 - CD8+ CTL : GZMK ADT-NKG2Dhi	PTMS
LYST.2	6.37206e-14	0.354165	0.365	0.314	2.87947e-09	C03 - CD8+ CTL : GZMK ADT-NKG2Dhi	LYST
NFATC1.1	7.82242e-14	-0.278299	0.052	0.147	3.53487e-09	C03 - CD8+ CTL : GZMK ADT-NKG2Dhi	NFATC1
ISG20L2	9.03572e-14	0.334733	0.247	0.188	4.08315e-09	C03 - CD8+ CTL : GZMK ADT-NKG2Dhi	ISG20L2
BRD2	1.09058e-13	0.282048	0.727	0.705	4.9282e-09	C03 - CD8+ CTL : GZMK ADT-NKG2Dhi	BRD2
FASLG.2	1.10087e-13	0.502289	0.18	0.1	4.97473e-09	C03 - CD8+ CTL : GZMK ADT-NKG2Dhi	FASLG
RBPJ.1	1.23993e-13	-0.471996	0.301	0.446	5.60312e-09	C03 - CD8+ CTL : GZMK ADT-NKG2Dhi	RBPJ
TMEM123	1.31107e-13	-0.342692	0.224	0.366	5.92461e-09	C03 - CD8+ CTL : GZMK ADT-NKG2Dhi	TMEM123
TAGLN2.1	1.34919e-13	-0.318288	0.555	0.699	6.09685e-09	C03 - CD8+ CTL : GZMK ADT-NKG2Dhi	TAGLN2
RPL34.2	2.55652e-13	-0.300683	0.97	0.981	1.15527e-08	C03 - CD8+ CTL : GZMK ADT-NKG2Dhi	RPL34
PLA2G16.1	4.27849e-13	0.344385	0.222	0.159	1.93341e-08	C03 - CD8+ CTL : GZMK ADT-NKG2Dhi	PLA2G16
MCOLN2	4.29943e-13	0.290258	0.141	0.064	1.94287e-08	C03 - CD8+ CTL : GZMK ADT-NKG2Dhi	MCOLN2
NDUFB1	4.38329e-13	-0.28906	0.201	0.334	1.98077e-08	C03 - CD8+ CTL : GZMK ADT-NKG2Dhi	NDUFB1
PHACTR2.1	4.42047e-13	-0.339105	0.138	0.26	1.99757e-08	C03 - CD8+ CTL : GZMK ADT-NKG2Dhi	PHACTR2
TYROBP.2	4.89395e-13	-0.721095	0.047	0.121	2.21153e-08	C03 - CD8+ CTL : GZMK ADT-NKG2Dhi	TYROBP
FCRL6	5.71205e-13	0.313669	0.128	0.055	2.58122e-08	C03 - CD8+ CTL : GZMK ADT-NKG2Dhi	FCRL6
CDKN1A.2	9.13156e-13	-0.333561	0.2	0.332	4.12646e-08	C03 - CD8+ CTL : GZMK ADT-NKG2Dhi	CDKN1A
MYADM.1	1.05243e-12	0.341841	0.66	0.61	4.75584e-08	C03 - CD8+ CTL : GZMK ADT-NKG2Dhi	MYADM
RARRES3.1	1.1508e-12	0.341974	0.62	0.556	5.20034e-08	C03 - CD8+ CTL : GZMK ADT-NKG2Dhi	RARRES3
SRRT	1.30173e-12	0.3077	0.187	0.13	5.88237e-08	C03 - CD8+ CTL : GZMK ADT-NKG2Dhi	SRRT
RASGEF1B	1.6246e-12	0.419333	0.357	0.279	7.3414e-08	C03 - CD8+ CTL : GZMK ADT-NKG2Dhi	RASGEF1B
CD48.1	1.70498e-12	0.31783	0.8	0.724	7.70464e-08	C03 - CD8+ CTL : GZMK ADT-NKG2Dhi	CD48
FTH1.2	1.78678e-12	-0.494531	0.974	0.971	8.07428e-08	C03 - CD8+ CTL : GZMK ADT-NKG2Dhi	FTH1
TLK1	1.92163e-12	-0.343494	0.132	0.25	8.68365e-08	C03 - CD8+ CTL : GZMK ADT-NKG2Dhi	TLK1
RORA.2	1.93349e-12	-0.393754	0.393	0.538	8.73723e-08	C03 - CD8+ CTL : GZMK ADT-NKG2Dhi	RORA
PIP4K2A	2.08475e-12	0.259619	0.393	0.36	9.42079e-08	C03 - CD8+ CTL : GZMK ADT-NKG2Dhi	PIP4K2A
RPL11.2	2.54634e-12	-0.272343	0.983	0.983	1.15067e-07	C03 - CD8+ CTL : GZMK ADT-NKG2Dhi	RPL11
ERO1B	2.71214e-12	0.337929	0.331	0.268	1.22559e-07	C03 - CD8+ CTL : GZMK ADT-NKG2Dhi	ERO1B
TSC22D2.1	2.8975e-12	0.344114	0.344	0.292	1.30935e-07	C03 - CD8+ CTL : GZMK ADT-NKG2Dhi	TSC22D2
LDHB.2	3.02976e-12	-0.361916	0.489	0.612	1.36912e-07	C03 - CD8+ CTL : GZMK ADT-NKG2Dhi	LDHB
CD69	3.869e-12	0.320798	0.892	0.822	1.74836e-07	C03 - CD8+ CTL : GZMK ADT-NKG2Dhi	CD69
YPEL5.1	4.34654e-12	0.318936	0.796	0.757	1.96416e-07	C03 - CD8+ CTL : GZMK ADT-NKG2Dhi	YPEL5
SAP18	4.65716e-12	0.297714	0.758	0.757	2.10453e-07	C03 - CD8+ CTL : GZMK ADT-NKG2Dhi	SAP18
PKM.2	4.68492e-12	-0.499716	0.317	0.441	2.11707e-07	C03 - CD8+ CTL : GZMK ADT-NKG2Dhi	PKM
HAPLN3	4.74044e-12	-0.268823	0.049	0.135	2.14216e-07	C03 - CD8+ CTL : GZMK ADT-NKG2Dhi	HAPLN3
CORO1B.1	5.2935e-12	-0.485203	0.219	0.344	2.39208e-07	C03 - CD8+ CTL : GZMK ADT-NKG2Dhi	CORO1B
BACH1.1	6.92107e-12	-0.299737	0.105	0.211	3.12756e-07	C03 - CD8+ CTL : GZMK ADT-NKG2Dhi	BACH1
SELL	8.94874e-12	-0.37591	0.118	0.228	4.04385e-07	C03 - CD8+ CTL : GZMK ADT-NKG2Dhi	SELL
LEF1	1.17216e-11	-0.309986	0.072	0.166	5.29687e-07	C03 - CD8+ CTL : GZMK ADT-NKG2Dhi	LEF1
MBD2	1.19313e-11	-0.260736	0.207	0.331	5.39163e-07	C03 - CD8+ CTL : GZMK ADT-NKG2Dhi	MBD2
RPL23.2	1.64796e-11	-0.325395	0.809	0.869	7.44698e-07	C03 - CD8+ CTL : GZMK ADT-NKG2Dhi	RPL23
ALKBH5	1.77617e-11	0.25579	0.232	0.204	8.02632e-07	C03 - CD8+ CTL : GZMK ADT-NKG2Dhi	ALKBH5
RPL32.2	1.82756e-11	-0.281148	0.977	0.983	8.25857e-07	C03 - CD8+ CTL : GZMK ADT-NKG2Dhi	RPL32
TRDC.2	1.86121e-11	-0.685176	0.037	0.114	8.41062e-07	C03 - CD8+ CTL : GZMK ADT-NKG2Dhi	TRDC
OASL	1.92066e-11	0.450019	0.351	0.259	8.67928e-07	C03 - CD8+ CTL : GZMK ADT-NKG2Dhi	OASL
ITGA1.2	2.15219e-11	0.331271	0.203	0.109	9.72551e-07	C03 - CD8+ CTL : GZMK ADT-NKG2Dhi	ITGA1
REEP5.1	2.34414e-11	0.284685	0.481	0.45	1.0593e-06	C03 - CD8+ CTL : GZMK ADT-NKG2Dhi	REEP5
COX5B.1	2.50302e-11	-0.282181	0.394	0.533	1.13109e-06	C03 - CD8+ CTL : GZMK ADT-NKG2Dhi	COX5B
GADD45G	3.53902e-11	-0.380685	0.091	0.188	1.59925e-06	C03 - CD8+ CTL : GZMK ADT-NKG2Dhi	GADD45G
ESYT2	3.54037e-11	-0.268018	0.108	0.211	1.59986e-06	C03 - CD8+ CTL : GZMK ADT-NKG2Dhi	ESYT2
PYHIN1.1	4.35279e-11	0.391259	0.319	0.236	1.96698e-06	C03 - CD8+ CTL : GZMK ADT-NKG2Dhi	PYHIN1
CCL3.2	4.6299e-11	0.466565	0.222	0.123	2.09221e-06	C03 - CD8+ CTL : GZMK ADT-NKG2Dhi	CCL3
FAM107B.2	4.72961e-11	-0.347663	0.499	0.634	2.13726e-06	C03 - CD8+ CTL : GZMK ADT-NKG2Dhi	FAM107B
IL2RG.1	5.43503e-11	-0.28166	0.494	0.628	2.45603e-06	C03 - CD8+ CTL : GZMK ADT-NKG2Dhi	IL2RG
PRKCB	5.56823e-11	0.281868	0.242	0.195	2.51623e-06	C03 - CD8+ CTL : GZMK ADT-NKG2Dhi	PRKCB
GPX4	5.79457e-11	-0.291598	0.433	0.569	2.61851e-06	C03 - CD8+ CTL : GZMK ADT-NKG2Dhi	GPX4
IL6ST	6.00346e-11	-0.324981	0.142	0.253	2.7129e-06	C03 - CD8+ CTL : GZMK ADT-NKG2Dhi	IL6ST
FABP5.2	6.12073e-11	0.453349	0.364	0.273	2.7659e-06	C03 - CD8+ CTL : GZMK ADT-NKG2Dhi	FABP5
ANXA1.2	6.32586e-11	0.303007	0.786	0.662	2.85859e-06	C03 - CD8+ CTL : GZMK ADT-NKG2Dhi	ANXA1
DDX3X.1	6.5414e-11	0.283246	0.862	0.838	2.95599e-06	C03 - CD8+ CTL : GZMK ADT-NKG2Dhi	DDX3X
NEU1.2	7.41811e-11	0.353152	0.577	0.523	3.35217e-06	C03 - CD8+ CTL : GZMK ADT-NKG2Dhi	NEU1
IER2.2	1.17771e-10	0.267388	0.842	0.771	5.32194e-06	C03 - CD8+ CTL : GZMK ADT-NKG2Dhi	IER2
IFRD1	1.18909e-10	0.266478	0.542	0.534	5.37337e-06	C03 - CD8+ CTL : GZMK ADT-NKG2Dhi	IFRD1
PPP2R2B	1.18925e-10	0.264814	0.138	0.068	5.37408e-06	C03 - CD8+ CTL : GZMK ADT-NKG2Dhi	PPP2R2B
HLA-DQA2.2	1.45806e-10	0.3442	0.177	0.097	6.58881e-06	C03 - CD8+ CTL : GZMK ADT-NKG2Dhi	HLA-DQA2
DUSP6	1.71796e-10	0.370455	0.187	0.125	7.76327e-06	C03 - CD8+ CTL : GZMK ADT-NKG2Dhi	DUSP6
TANK	1.95732e-10	-0.408484	0.371	0.498	8.84494e-06	C03 - CD8+ CTL : GZMK ADT-NKG2Dhi	TANK
CDC42EP3.1	1.97967e-10	0.258912	0.315	0.293	8.94595e-06	C03 - CD8+ CTL : GZMK ADT-NKG2Dhi	CDC42EP3
CYLD	2.04869e-10	-0.260051	0.327	0.454	9.25784e-06	C03 - CD8+ CTL : GZMK ADT-NKG2Dhi	CYLD
ETV6	2.14741e-10	-0.259637	0.063	0.148	9.70392e-06	C03 - CD8+ CTL : GZMK ADT-NKG2Dhi	ETV6
RAB27A.1	2.18832e-10	0.254271	0.348	0.311	9.8888e-06	C03 - CD8+ CTL : GZMK ADT-NKG2Dhi	RAB27A
GABARAPL1.1	2.84556e-10	0.31372	0.401	0.335	1.28588e-05	C03 - CD8+ CTL : GZMK ADT-NKG2Dhi	GABARAPL1
MDFIC	3.03404e-10	-0.286532	0.165	0.275	1.37105e-05	C03 - CD8+ CTL : GZMK ADT-NKG2Dhi	MDFIC
TYMP.2	3.31225e-10	-0.466367	0.305	0.429	1.49677e-05	C03 - CD8+ CTL : GZMK ADT-NKG2Dhi	TYMP
LDHA	3.54232e-10	0.283441	0.754	0.746	1.60074e-05	C03 - CD8+ CTL : GZMK ADT-NKG2Dhi	LDHA
PRKCH	3.65999e-10	0.251728	0.399	0.359	1.65391e-05	C03 - CD8+ CTL : GZMK ADT-NKG2Dhi	PRKCH
SQSTM1.1	4.05132e-10	-0.36308	0.486	0.614	1.83075e-05	C03 - CD8+ CTL : GZMK ADT-NKG2Dhi	SQSTM1
AQP3.2	5.09438e-10	-0.333665	0.147	0.253	2.3021e-05	C03 - CD8+ CTL : GZMK ADT-NKG2Dhi	AQP3
RILPL2.2	6.78691e-10	0.314046	0.397	0.375	3.06694e-05	C03 - CD8+ CTL : GZMK ADT-NKG2Dhi	RILPL2
TPM4	8.80072e-10	-0.255598	0.253	0.372	3.97696e-05	C03 - CD8+ CTL : GZMK ADT-NKG2Dhi	TPM4
HLA-DRB5.2	1.03107e-09	0.364917	0.281	0.194	4.65932e-05	C03 - CD8+ CTL : GZMK ADT-NKG2Dhi	HLA-DRB5
APBA2	1.17604e-09	0.286654	0.154	0.086	5.31442e-05	C03 - CD8+ CTL : GZMK ADT-NKG2Dhi	APBA2
CD83.1	1.35722e-09	-0.572375	0.193	0.297	6.13316e-05	C03 - CD8+ CTL : GZMK ADT-NKG2Dhi	CD83
PHLDA2	1.40749e-09	-0.309904	0.045	0.116	6.36033e-05	C03 - CD8+ CTL : GZMK ADT-NKG2Dhi	PHLDA2
SERTAD1.1	1.48669e-09	0.305312	0.65	0.619	6.7182e-05	C03 - CD8+ CTL : GZMK ADT-NKG2Dhi	SERTAD1
CBLB.2	1.51637e-09	0.27708	0.322	0.274	6.85234e-05	C03 - CD8+ CTL : GZMK ADT-NKG2Dhi	CBLB
CD7.2	1.53983e-09	-0.451736	0.491	0.596	6.95836e-05	C03 - CD8+ CTL : GZMK ADT-NKG2Dhi	CD7
STK17A	2.16761e-09	0.26912	0.719	0.683	9.7952e-05	C03 - CD8+ CTL : GZMK ADT-NKG2Dhi	STK17A
CCR7.2	2.43748e-09	-0.525951	0.176	0.279	0.000110147	C03 - CD8+ CTL : GZMK ADT-NKG2Dhi	CCR7
HLA-DMA.2	2.56597e-09	0.26891	0.286	0.23	0.000115954	C03 - CD8+ CTL : GZMK ADT-NKG2Dhi	HLA-DMA
CD96	2.82606e-09	0.250342	0.498	0.462	0.000127707	C03 - CD8+ CTL : GZMK ADT-NKG2Dhi	CD96
MLLT3	3.03508e-09	0.289464	0.242	0.182	0.000137152	C03 - CD8+ CTL : GZMK ADT-NKG2Dhi	MLLT3
RANBP1.1	3.2278e-09	-0.264724	0.245	0.358	0.000145861	C03 - CD8+ CTL : GZMK ADT-NKG2Dhi	RANBP1
GLRX.1	3.24432e-09	-0.282381	0.199	0.307	0.000146608	C03 - CD8+ CTL : GZMK ADT-NKG2Dhi	GLRX
CAST	3.87627e-09	-0.359923	0.377	0.493	0.000175165	C03 - CD8+ CTL : GZMK ADT-NKG2Dhi	CAST
MARCKSL1.1	4.08523e-09	0.309809	0.396	0.356	0.000184608	C03 - CD8+ CTL : GZMK ADT-NKG2Dhi	MARCKSL1
SLC1A5	4.27529e-09	0.26456	0.272	0.212	0.000193196	C03 - CD8+ CTL : GZMK ADT-NKG2Dhi	SLC1A5
MIAT.2	4.3823e-09	0.305356	0.294	0.199	0.000198032	C03 - CD8+ CTL : GZMK ADT-NKG2Dhi	MIAT
EPSTI1.2	4.5353e-09	-0.287471	0.209	0.318	0.000204946	C03 - CD8+ CTL : GZMK ADT-NKG2Dhi	EPSTI1
mm10---Gm42418.1	5.62355e-09	-0.361145	0.873	0.939	0.000254122	C03 - CD8+ CTL : GZMK ADT-NKG2Dhi	mm10---Gm42418
CD99	6.3064e-09	0.256495	0.729	0.673	0.00028498	C03 - CD8+ CTL : GZMK ADT-NKG2Dhi	CD99
HTATIP2.2	7.96766e-09	-0.269879	0.096	0.183	0.00036005	C03 - CD8+ CTL : GZMK ADT-NKG2Dhi	HTATIP2
CD3D.1	8.70355e-09	0.253274	0.868	0.796	0.000393305	C03 - CD8+ CTL : GZMK ADT-NKG2Dhi	CD3D
NDUFV2	8.97101e-09	-0.297196	0.351	0.47	0.000405391	C03 - CD8+ CTL : GZMK ADT-NKG2Dhi	NDUFV2
ICOS	9.4515e-09	-0.363698	0.318	0.436	0.000427104	C03 - CD8+ CTL : GZMK ADT-NKG2Dhi	ICOS
ZFP36L1	1.51677e-08	0.275286	0.688	0.707	0.000685414	C03 - CD8+ CTL : GZMK ADT-NKG2Dhi	ZFP36L1
SGK1.1	1.84228e-08	-0.379527	0.142	0.238	0.000832508	C03 - CD8+ CTL : GZMK ADT-NKG2Dhi	SGK1
TBCD	1.85185e-08	0.25631	0.194	0.138	0.000836833	C03 - CD8+ CTL : GZMK ADT-NKG2Dhi	TBCD
CD3G	2.59755e-08	0.271139	0.614	0.566	0.00117381	C03 - CD8+ CTL : GZMK ADT-NKG2Dhi	CD3G
PRDM1.1	2.91288e-08	-0.295927	0.207	0.311	0.0013163	C03 - CD8+ CTL : GZMK ADT-NKG2Dhi	PRDM1
PBXIP1	3.1138e-08	-0.272278	0.283	0.395	0.00140709	C03 - CD8+ CTL : GZMK ADT-NKG2Dhi	PBXIP1
BTN3A1	3.29733e-08	0.256983	0.239	0.192	0.00149003	C03 - CD8+ CTL : GZMK ADT-NKG2Dhi	BTN3A1
THEMIS	3.39152e-08	0.285743	0.229	0.149	0.00153259	C03 - CD8+ CTL : GZMK ADT-NKG2Dhi	THEMIS
RGCC.1	4.08753e-08	0.278621	0.823	0.808	0.00184712	C03 - CD8+ CTL : GZMK ADT-NKG2Dhi	RGCC
MIDN	4.15565e-08	0.282829	0.488	0.425	0.0018779	C03 - CD8+ CTL : GZMK ADT-NKG2Dhi	MIDN
GOLGA8B.1	5.11634e-08	-0.262696	0.104	0.186	0.00231202	C03 - CD8+ CTL : GZMK ADT-NKG2Dhi	GOLGA8B
PMAIP1.2	5.39405e-08	-0.39728	0.358	0.468	0.00243752	C03 - CD8+ CTL : GZMK ADT-NKG2Dhi	PMAIP1
FKBP1A.1	6.91908e-08	-0.288921	0.301	0.41	0.00312667	C03 - CD8+ CTL : GZMK ADT-NKG2Dhi	FKBP1A
MAP3K8.1	9.25448e-08	0.271046	0.229	0.189	0.00418201	C03 - CD8+ CTL : GZMK ADT-NKG2Dhi	MAP3K8
IFI44L	1.01531e-07	-0.259117	0.129	0.211	0.00458807	C03 - CD8+ CTL : GZMK ADT-NKG2Dhi	IFI44L
ID3.2	1.04558e-07	-0.512602	0.163	0.254	0.00472486	C03 - CD8+ CTL : GZMK ADT-NKG2Dhi	ID3
FAM53C	1.27482e-07	0.25729	0.337	0.291	0.00576079	C03 - CD8+ CTL : GZMK ADT-NKG2Dhi	FAM53C
PLIN2.1	1.40818e-07	-0.423745	0.217	0.317	0.00636341	C03 - CD8+ CTL : GZMK ADT-NKG2Dhi	PLIN2
NMB.2	1.50978e-07	-0.567619	0.053	0.116	0.00682252	C03 - CD8+ CTL : GZMK ADT-NKG2Dhi	NMB
PABPC1.2	1.82743e-07	-0.252855	0.78	0.849	0.00825796	C03 - CD8+ CTL : GZMK ADT-NKG2Dhi	PABPC1
LMNA.2	2.01107e-07	-0.462222	0.561	0.647	0.00908785	C03 - CD8+ CTL : GZMK ADT-NKG2Dhi	LMNA
ENO1.1	2.01767e-07	-0.329306	0.489	0.582	0.00911763	C03 - CD8+ CTL : GZMK ADT-NKG2Dhi	ENO1
RP11-489E7.4	2.31143e-07	0.276538	0.201	0.183	0.0104451	C03 - CD8+ CTL : GZMK ADT-NKG2Dhi	RP11-489E7.4
FAM129A	4.11187e-07	-0.267106	0.237	0.336	0.0185811	C03 - CD8+ CTL : GZMK ADT-NKG2Dhi	FAM129A
TMEM2	4.72513e-07	0.273122	0.255	0.231	0.0213524	C03 - CD8+ CTL : GZMK ADT-NKG2Dhi	TMEM2
FKBP5	4.79639e-07	-0.299777	0.184	0.276	0.0216744	C03 - CD8+ CTL : GZMK ADT-NKG2Dhi	FKBP5
ZNF292.2	5.45898e-07	-0.304545	0.258	0.357	0.0246686	C03 - CD8+ CTL : GZMK ADT-NKG2Dhi	ZNF292
NR3C1	5.65038e-07	-0.395917	0.358	0.449	0.0255335	C03 - CD8+ CTL : GZMK ADT-NKG2Dhi	NR3C1
BAG3	6.08573e-07	-0.272603	0.148	0.233	0.0275008	C03 - CD8+ CTL : GZMK ADT-NKG2Dhi	BAG3
ODC1.1	6.48982e-07	0.253792	0.57	0.527	0.0293269	C03 - CD8+ CTL : GZMK ADT-NKG2Dhi	ODC1
CHST12.2	6.58221e-07	0.268032	0.245	0.197	0.0297443	C03 - CD8+ CTL : GZMK ADT-NKG2Dhi	CHST12
CITED2	7.24e-07	0.310541	0.469	0.405	0.0327168	C03 - CD8+ CTL : GZMK ADT-NKG2Dhi	CITED2
TTN.2	7.34591e-07	-0.328064	0.052	0.111	0.0331954	C03 - CD8+ CTL : GZMK ADT-NKG2Dhi	TTN
LGALS3	7.42388e-07	-0.262867	0.229	0.324	0.0335478	C03 - CD8+ CTL : GZMK ADT-NKG2Dhi	LGALS3
SOD1	7.48323e-07	-0.271322	0.696	0.766	0.033816	C03 - CD8+ CTL : GZMK ADT-NKG2Dhi	SOD1
SOD2.1	8.94659e-07	-0.329484	0.259	0.357	0.0404287	C03 - CD8+ CTL : GZMK ADT-NKG2Dhi	SOD2
UCP2.2	1.07667e-06	-0.299054	0.279	0.377	0.0486538	C03 - CD8+ CTL : GZMK ADT-NKG2Dhi	UCP2
TNFRSF9.2	1.0883e-06	-0.252543	0.117	0.191	0.049179	C03 - CD8+ CTL : GZMK ADT-NKG2Dhi	TNFRSF9
IL2RB.2	1.71968e-06	-0.29827	0.206	0.295	0.0777107	C03 - CD8+ CTL : GZMK ADT-NKG2Dhi	IL2RB
HSPD1.1	1.76205e-06	-0.452073	0.606	0.679	0.0796251	C03 - CD8+ CTL : GZMK ADT-NKG2Dhi	HSPD1
PMEPA1.1	2.05407e-06	0.253473	0.236	0.195	0.0928214	C03 - CD8+ CTL : GZMK ADT-NKG2Dhi	PMEPA1
NAMPT.1	2.23156e-06	-0.362185	0.347	0.442	0.100842	C03 - CD8+ CTL : GZMK ADT-NKG2Dhi	NAMPT
ARPC1B.1	2.55153e-06	-0.27283	0.524	0.612	0.115301	C03 - CD8+ CTL : GZMK ADT-NKG2Dhi	ARPC1B
ATF3.1	3.30153e-06	0.337163	0.412	0.354	0.149193	C03 - CD8+ CTL : GZMK ADT-NKG2Dhi	ATF3
MYC.1	4.02139e-06	0.252877	0.127	0.124	0.181723	C03 - CD8+ CTL : GZMK ADT-NKG2Dhi	MYC
JMY	4.43033e-06	-0.265676	0.226	0.315	0.200202	C03 - CD8+ CTL : GZMK ADT-NKG2Dhi	JMY
AHNAK.1	4.71194e-06	-0.286999	0.492	0.59	0.212928	C03 - CD8+ CTL : GZMK ADT-NKG2Dhi	AHNAK
GLUL	5.54007e-06	0.292932	0.253	0.201	0.25035	C03 - CD8+ CTL : GZMK ADT-NKG2Dhi	GLUL
ID2.2	5.58308e-06	0.271121	0.717	0.656	0.252294	C03 - CD8+ CTL : GZMK ADT-NKG2Dhi	ID2
FRMD4B	6.04543e-06	-0.250203	0.094	0.159	0.273187	C03 - CD8+ CTL : GZMK ADT-NKG2Dhi	FRMD4B
CACYBP.1	6.66129e-06	-0.363093	0.413	0.504	0.301017	C03 - CD8+ CTL : GZMK ADT-NKG2Dhi	CACYBP
RGS16	7.04617e-06	-0.335455	0.114	0.184	0.31841	C03 - CD8+ CTL : GZMK ADT-NKG2Dhi	RGS16
CEMIP2.1	8.62471e-06	0.271478	0.21	0.188	0.389742	C03 - CD8+ CTL : GZMK ADT-NKG2Dhi	CEMIP2
XCL1.2	1.93217e-05	-0.703884	0.102	0.164	0.873129	C03 - CD8+ CTL : GZMK ADT-NKG2Dhi	XCL1
HSPE1.1	2.16321e-05	-0.330908	0.698	0.772	0.977535	C03 - CD8+ CTL : GZMK ADT-NKG2Dhi	HSPE1
TIGIT.2	2.80064e-05	-0.359846	0.312	0.343	1	C03 - CD8+ CTL : GZMK ADT-NKG2Dhi	TIGIT
WHSC1L1.1	4.46779e-05	-0.312221	0.212	0.284	1	C03 - CD8+ CTL : GZMK ADT-NKG2Dhi	WHSC1L1
GNLY.2	5.04694e-05	-0.653521	0.204	0.181	1	C03 - CD8+ CTL : GZMK ADT-NKG2Dhi	GNLY
GADD45A.2	5.23082e-05	-0.432778	0.327	0.399	1	C03 - CD8+ CTL : GZMK ADT-NKG2Dhi	GADD45A
LDLRAD4.2	5.2485e-05	-0.288868	0.214	0.291	1	C03 - CD8+ CTL : GZMK ADT-NKG2Dhi	LDLRAD4
DNAJA4.1	5.32408e-05	-0.259761	0.111	0.174	1	C03 - CD8+ CTL : GZMK ADT-NKG2Dhi	DNAJA4
SOCS3.1	6.20768e-05	-0.252026	0.396	0.483	1	C03 - CD8+ CTL : GZMK ADT-NKG2Dhi	SOCS3
CARD16.2	8.18592e-05	-0.282863	0.272	0.351	1	C03 - CD8+ CTL : GZMK ADT-NKG2Dhi	CARD16
MIR4435-2HG.2	8.64733e-05	-0.254222	0.138	0.204	1	C03 - CD8+ CTL : GZMK ADT-NKG2Dhi	MIR4435-2HG
MRPL18.1	0.000152908	-0.271539	0.325	0.405	1	C03 - CD8+ CTL : GZMK ADT-NKG2Dhi	MRPL18
SYNE2	0.000204908	-0.295702	0.481	0.56	1	C03 - CD8+ CTL : GZMK ADT-NKG2Dhi	SYNE2
SAT1.2	0.000215299	-0.378045	0.734	0.792	1	C03 - CD8+ CTL : GZMK ADT-NKG2Dhi	SAT1
TUBB.2	0.000243861	-0.368152	0.25	0.313	1	C03 - CD8+ CTL : GZMK ADT-NKG2Dhi	TUBB
IGKC.2	0.00116882	0.451089	0.272	0.336	1	C03 - CD8+ CTL : GZMK ADT-NKG2Dhi	IGKC
PGM2L1	0.00189633	-0.268569	0.125	0.176	1	C03 - CD8+ CTL : GZMK ADT-NKG2Dhi	PGM2L1
IL32.2	0.00663016	-0.277903	0.872	0.863	1	C03 - CD8+ CTL : GZMK ADT-NKG2Dhi	IL32
KLRD1.2	4.57268e-100	0.805654	0.564	0.18	2.06635e-95	C04 - CD8+ CTL : METRNL ADT-NKG2Dmid	KLRD1
NKG7.3	1.30668e-98	0.318918	0.733	0.337	5.90476e-94	C04 - CD8+ CTL : METRNL ADT-NKG2Dmid	NKG7
CCL5.3	4.38995e-87	0.69202	0.932	0.586	1.98378e-82	C04 - CD8+ CTL : METRNL ADT-NKG2Dmid	CCL5
TRGC2.3	6.83464e-83	1.06951	0.531	0.173	3.08851e-78	C04 - CD8+ CTL : METRNL ADT-NKG2Dmid	TRGC2
CD8A.3	1.33743e-68	0.792266	0.54	0.21	6.04369e-64	C04 - CD8+ CTL : METRNL ADT-NKG2Dmid	CD8A
ZFP36L2.1	2.55232e-65	0.793041	0.984	0.894	1.15337e-60	C04 - CD8+ CTL : METRNL ADT-NKG2Dmid	ZFP36L2
YPEL5.2	1.96919e-64	0.807731	0.918	0.746	8.89859e-60	C04 - CD8+ CTL : METRNL ADT-NKG2Dmid	YPEL5
METRNL.2	2.0503e-64	1.0248	0.675	0.358	9.26511e-60	C04 - CD8+ CTL : METRNL ADT-NKG2Dmid	METRNL
CD8B.3	9.83926e-63	0.76709	0.477	0.173	4.44626e-58	C04 - CD8+ CTL : METRNL ADT-NKG2Dmid	CD8B
EIF4A3.2	1.90846e-61	0.893839	0.796	0.593	8.62413e-57	C04 - CD8+ CTL : METRNL ADT-NKG2Dmid	EIF4A3
CTLA4.3	9.31052e-60	-1.48969	0.046	0.303	4.20733e-55	C04 - CD8+ CTL : METRNL ADT-NKG2Dmid	CTLA4
CTSW.2	8.13608e-55	0.728747	0.531	0.227	3.67661e-50	C04 - CD8+ CTL : METRNL ADT-NKG2Dmid	CTSW
TRDC.3	3.58074e-50	1.30474	0.309	0.088	1.6181e-45	C04 - CD8+ CTL : METRNL ADT-NKG2Dmid	TRDC
ZFP36.1	4.92948e-50	0.649166	0.961	0.832	2.22758e-45	C04 - CD8+ CTL : METRNL ADT-NKG2Dmid	ZFP36
CD55.1	1.15332e-49	0.769862	0.662	0.37	5.21172e-45	C04 - CD8+ CTL : METRNL ADT-NKG2Dmid	CD55
XCL1.3	2.18654e-49	0.773287	0.388	0.137	9.88078e-45	C04 - CD8+ CTL : METRNL ADT-NKG2Dmid	XCL1
XCL2.3	3.7062e-48	0.279043	0.413	0.173	1.67479e-43	C04 - CD8+ CTL : METRNL ADT-NKG2Dmid	XCL2
FOSB.1	7.46491e-48	0.594371	0.951	0.851	3.37332e-43	C04 - CD8+ CTL : METRNL ADT-NKG2Dmid	FOSB
ZNF683.2	1.42207e-47	0.573005	0.35	0.118	6.4262e-43	C04 - CD8+ CTL : METRNL ADT-NKG2Dmid	ZNF683
ZNF331.1	3.28754e-46	0.789194	0.805	0.598	1.48561e-41	C04 - CD8+ CTL : METRNL ADT-NKG2Dmid	ZNF331
ICOS.1	4.63138e-46	-1.18287	0.184	0.447	2.09287e-41	C04 - CD8+ CTL : METRNL ADT-NKG2Dmid	ICOS
TNFRSF4.3	6.89828e-46	-1.4097	0.044	0.256	3.11726e-41	C04 - CD8+ CTL : METRNL ADT-NKG2Dmid	TNFRSF4
MYADM.2	1.16698e-44	0.674816	0.827	0.595	5.27347e-40	C04 - CD8+ CTL : METRNL ADT-NKG2Dmid	MYADM
HOMER1	4.89544e-44	0.642916	0.251	0.065	2.2122e-39	C04 - CD8+ CTL : METRNL ADT-NKG2Dmid	HOMER1
TUBA4A.2	1.08708e-43	0.808856	0.779	0.555	4.91241e-39	C04 - CD8+ CTL : METRNL ADT-NKG2Dmid	TUBA4A
AREG.1	5.40244e-43	0.756165	0.587	0.309	2.44131e-38	C04 - CD8+ CTL : METRNL ADT-NKG2Dmid	AREG
CD7.3	2.79571e-42	0.682037	0.799	0.566	1.26335e-37	C04 - CD8+ CTL : METRNL ADT-NKG2Dmid	CD7
TRGC1	2.2182e-41	0.765346	0.256	0.074	1.00238e-36	C04 - CD8+ CTL : METRNL ADT-NKG2Dmid	TRGC1
CXCR4.2	3.56453e-41	0.627422	0.962	0.886	1.61078e-36	C04 - CD8+ CTL : METRNL ADT-NKG2Dmid	CXCR4
EZR.1	8.71663e-41	0.688271	0.856	0.729	3.93896e-36	C04 - CD8+ CTL : METRNL ADT-NKG2Dmid	EZR
LDLRAD4.3	1.81671e-40	0.953724	0.447	0.269	8.20953e-36	C04 - CD8+ CTL : METRNL ADT-NKG2Dmid	LDLRAD4
MAF.2	3.94601e-40	-0.903302	0.08	0.301	1.78316e-35	C04 - CD8+ CTL : METRNL ADT-NKG2Dmid	MAF
MATK.2	4.98177e-40	0.511579	0.386	0.156	2.25121e-35	C04 - CD8+ CTL : METRNL ADT-NKG2Dmid	MATK
UBE2S.2	6.1404e-39	0.622021	0.881	0.767	2.77479e-34	C04 - CD8+ CTL : METRNL ADT-NKG2Dmid	UBE2S
LYAR.1	7.73535e-39	0.581188	0.534	0.273	3.49553e-34	C04 - CD8+ CTL : METRNL ADT-NKG2Dmid	LYAR
CD4.1	1.16435e-38	-0.618277	0.033	0.219	5.26158e-34	C04 - CD8+ CTL : METRNL ADT-NKG2Dmid	CD4
CD9.2	1.27152e-38	0.612073	0.272	0.083	5.74589e-34	C04 - CD8+ CTL : METRNL ADT-NKG2Dmid	CD9
KLRC2	3.72414e-38	0.646205	0.223	0.056	1.6829e-33	C04 - CD8+ CTL : METRNL ADT-NKG2Dmid	KLRC2
MCL1.1	1.6476e-37	0.55816	0.926	0.814	7.44535e-33	C04 - CD8+ CTL : METRNL ADT-NKG2Dmid	MCL1
BATF.3	1.63871e-36	-1.18384	0.162	0.366	7.40515e-32	C04 - CD8+ CTL : METRNL ADT-NKG2Dmid	BATF
KDM6B.1	2.15197e-36	0.597564	0.714	0.472	9.72452e-32	C04 - CD8+ CTL : METRNL ADT-NKG2Dmid	KDM6B
LITAF.2	1.65682e-35	0.680243	0.666	0.459	7.48702e-31	C04 - CD8+ CTL : METRNL ADT-NKG2Dmid	LITAF
FAM177A1.1	3.64932e-35	0.655028	0.689	0.483	1.64909e-30	C04 - CD8+ CTL : METRNL ADT-NKG2Dmid	FAM177A1
RGCC.2	8.97468e-35	0.639732	0.934	0.798	4.05557e-30	C04 - CD8+ CTL : METRNL ADT-NKG2Dmid	RGCC
TSHZ2.1	4.33123e-34	-0.757477	0.017	0.167	1.95724e-29	C04 - CD8+ CTL : METRNL ADT-NKG2Dmid	TSHZ2
RALGAPA1	2.58767e-33	0.602708	0.615	0.387	1.16934e-28	C04 - CD8+ CTL : METRNL ADT-NKG2Dmid	RALGAPA1
GABARAPL1.2	3.73158e-33	0.588066	0.559	0.321	1.68626e-28	C04 - CD8+ CTL : METRNL ADT-NKG2Dmid	GABARAPL1
PRMT9	5.89792e-33	0.590604	0.452	0.227	2.66521e-28	C04 - CD8+ CTL : METRNL ADT-NKG2Dmid	PRMT9
DUSP2.3	3.2221e-32	0.528534	0.92	0.781	1.45604e-27	C04 - CD8+ CTL : METRNL ADT-NKG2Dmid	DUSP2
RP1-313I6.12.1	1.10942e-31	0.682193	0.311	0.123	5.01335e-27	C04 - CD8+ CTL : METRNL ADT-NKG2Dmid	RP1-313I6.12
CD2.1	1.9216e-31	-0.538409	0.808	0.824	8.68353e-27	C04 - CD8+ CTL : METRNL ADT-NKG2Dmid	CD2
GPR65	2.7254e-31	0.624233	0.46	0.247	1.23158e-26	C04 - CD8+ CTL : METRNL ADT-NKG2Dmid	GPR65
ATP1B3	7.70603e-31	0.73251	0.681	0.536	3.48228e-26	C04 - CD8+ CTL : METRNL ADT-NKG2Dmid	ATP1B3
CLEC2B.2	9.34113e-31	0.433542	0.725	0.487	4.22116e-26	C04 - CD8+ CTL : METRNL ADT-NKG2Dmid	CLEC2B
YBX3.3	1.11104e-30	0.532308	0.29	0.111	5.02068e-26	C04 - CD8+ CTL : METRNL ADT-NKG2Dmid	YBX3
MARCKSL1.2	2.75418e-30	0.607788	0.568	0.34	1.24459e-25	C04 - CD8+ CTL : METRNL ADT-NKG2Dmid	MARCKSL1
TIGIT.3	8.54594e-30	-0.948714	0.212	0.352	3.86182e-25	C04 - CD8+ CTL : METRNL ADT-NKG2Dmid	TIGIT
GLUL.1	1.78287e-29	0.717207	0.389	0.189	8.05661e-25	C04 - CD8+ CTL : METRNL ADT-NKG2Dmid	GLUL
CORO1B.2	5.72386e-29	-0.786461	0.173	0.347	2.58656e-24	C04 - CD8+ CTL : METRNL ADT-NKG2Dmid	CORO1B
EIF1.1	8.00034e-29	0.289179	1	0.986	3.61527e-24	C04 - CD8+ CTL : METRNL ADT-NKG2Dmid	EIF1
TBC1D4.3	1.93901e-28	-0.640495	0.046	0.201	8.76218e-24	C04 - CD8+ CTL : METRNL ADT-NKG2Dmid	TBC1D4
ABCB1	3.0536e-28	0.319947	0.19	0.055	1.37989e-23	C04 - CD8+ CTL : METRNL ADT-NKG2Dmid	ABCB1
ANKRD37.1	3.54456e-28	0.77415	0.482	0.3	1.60175e-23	C04 - CD8+ CTL : METRNL ADT-NKG2Dmid	ANKRD37
SLC7A5.1	4.76506e-28	0.580419	0.466	0.26	2.15328e-23	C04 - CD8+ CTL : METRNL ADT-NKG2Dmid	SLC7A5
MAFF.1	9.4982e-28	0.551747	0.352	0.162	4.29214e-23	C04 - CD8+ CTL : METRNL ADT-NKG2Dmid	MAFF
HOPX.2	1.77869e-27	0.655545	0.454	0.245	8.03771e-23	C04 - CD8+ CTL : METRNL ADT-NKG2Dmid	HOPX
TGFB1.1	2.56256e-27	0.544665	0.752	0.584	1.158e-22	C04 - CD8+ CTL : METRNL ADT-NKG2Dmid	TGFB1
REL.1	3.29672e-27	0.463954	0.865	0.705	1.48975e-22	C04 - CD8+ CTL : METRNL ADT-NKG2Dmid	REL
RANBP2	3.66886e-27	0.583576	0.488	0.297	1.65792e-22	C04 - CD8+ CTL : METRNL ADT-NKG2Dmid	RANBP2
GNLY.3	7.28261e-27	0.966326	0.356	0.167	3.29094e-22	C04 - CD8+ CTL : METRNL ADT-NKG2Dmid	GNLY
JUND.1	1.65126e-26	0.340176	0.928	0.941	7.46189e-22	C04 - CD8+ CTL : METRNL ADT-NKG2Dmid	JUND
ZNF165.1	2.85636e-26	0.498869	0.25	0.095	1.29076e-21	C04 - CD8+ CTL : METRNL ADT-NKG2Dmid	ZNF165
HLA-DRB1.3	3.07097e-26	-0.917283	0.399	0.541	1.38774e-21	C04 - CD8+ CTL : METRNL ADT-NKG2Dmid	HLA-DRB1
HCST.3	3.98024e-26	0.389002	0.892	0.748	1.79863e-21	C04 - CD8+ CTL : METRNL ADT-NKG2Dmid	HCST
ITM2C.3	6.82116e-26	0.327308	0.399	0.21	3.08241e-21	C04 - CD8+ CTL : METRNL ADT-NKG2Dmid	ITM2C
NCR3.2	8.00323e-26	0.479709	0.24	0.089	3.61658e-21	C04 - CD8+ CTL : METRNL ADT-NKG2Dmid	NCR3
ADGRE5.1	1.00497e-25	0.496674	0.727	0.528	4.54136e-21	C04 - CD8+ CTL : METRNL ADT-NKG2Dmid	ADGRE5
TRAC.1	2.10118e-25	-0.510104	0.788	0.809	9.49504e-21	C04 - CD8+ CTL : METRNL ADT-NKG2Dmid	TRAC
H3F3B.1	3.92562e-25	0.291395	1	0.986	1.77395e-20	C04 - CD8+ CTL : METRNL ADT-NKG2Dmid	H3F3B
IDI1	5.81216e-25	0.50089	0.651	0.445	2.62646e-20	C04 - CD8+ CTL : METRNL ADT-NKG2Dmid	IDI1
UAP1.1	9.74085e-25	0.47963	0.349	0.168	4.40179e-20	C04 - CD8+ CTL : METRNL ADT-NKG2Dmid	UAP1
FOXP3.3	9.74522e-25	-0.499354	0.006	0.108	4.40377e-20	C04 - CD8+ CTL : METRNL ADT-NKG2Dmid	FOXP3
CD40LG.3	2.79977e-24	-0.861929	0.058	0.205	1.26519e-19	C04 - CD8+ CTL : METRNL ADT-NKG2Dmid	CD40LG
ITGB1.1	3.20523e-24	-0.610546	0.356	0.509	1.44841e-19	C04 - CD8+ CTL : METRNL ADT-NKG2Dmid	ITGB1
SELK.1	3.8819e-24	0.75057	0.499	0.369	1.75419e-19	C04 - CD8+ CTL : METRNL ADT-NKG2Dmid	SELK
NUCB2.2	4.28272e-24	0.46613	0.363	0.181	1.93532e-19	C04 - CD8+ CTL : METRNL ADT-NKG2Dmid	NUCB2
FAM43A.1	1.02432e-23	0.513697	0.281	0.123	4.62881e-19	C04 - CD8+ CTL : METRNL ADT-NKG2Dmid	FAM43A
ELL2.1	1.06262e-23	0.433577	0.419	0.228	4.80186e-19	C04 - CD8+ CTL : METRNL ADT-NKG2Dmid	ELL2
VIM.1	1.13904e-23	0.439099	0.978	0.914	5.14719e-19	C04 - CD8+ CTL : METRNL ADT-NKG2Dmid	VIM
TUBB4B.1	1.75601e-23	0.421961	0.912	0.784	7.93523e-19	C04 - CD8+ CTL : METRNL ADT-NKG2Dmid	TUBB4B
ANXA1.3	2.27195e-23	0.289834	0.845	0.658	1.02667e-18	C04 - CD8+ CTL : METRNL ADT-NKG2Dmid	ANXA1
FOSL2	3.10941e-23	0.480474	0.658	0.462	1.40511e-18	C04 - CD8+ CTL : METRNL ADT-NKG2Dmid	FOSL2
ULBP2	3.4633e-23	0.336664	0.195	0.066	1.56503e-18	C04 - CD8+ CTL : METRNL ADT-NKG2Dmid	ULBP2
PIK3R1.1	4.03109e-23	0.604022	0.584	0.412	1.82161e-18	C04 - CD8+ CTL : METRNL ADT-NKG2Dmid	PIK3R1
MIR4435-2HG.3	4.6003e-23	-0.60223	0.068	0.21	2.07883e-18	C04 - CD8+ CTL : METRNL ADT-NKG2Dmid	MIR4435-2HG
LAIR2.3	4.6121e-23	-0.466084	0.008	0.107	2.08416e-18	C04 - CD8+ CTL : METRNL ADT-NKG2Dmid	LAIR2
PTP4A1	4.84529e-23	0.53608	0.455	0.295	2.18954e-18	C04 - CD8+ CTL : METRNL ADT-NKG2Dmid	PTP4A1
PABPC1.3	6.95908e-23	0.396159	0.909	0.836	3.14474e-18	C04 - CD8+ CTL : METRNL ADT-NKG2Dmid	PABPC1
PRDM1.2	1.67833e-22	-0.666384	0.143	0.317	7.5842e-18	C04 - CD8+ CTL : METRNL ADT-NKG2Dmid	PRDM1
PHTF2.1	1.77362e-22	-0.492867	0.064	0.206	8.01482e-18	C04 - CD8+ CTL : METRNL ADT-NKG2Dmid	PHTF2
CD63.2	4.21367e-22	0.475622	0.669	0.491	1.90412e-17	C04 - CD8+ CTL : METRNL ADT-NKG2Dmid	CD63
IL2RA.3	4.69772e-22	-0.74009	0.022	0.129	2.12285e-17	C04 - CD8+ CTL : METRNL ADT-NKG2Dmid	IL2RA
CRTAM.3	5.51688e-22	0.383035	0.279	0.132	2.49302e-17	C04 - CD8+ CTL : METRNL ADT-NKG2Dmid	CRTAM
SERTAD1.2	5.95486e-22	0.419049	0.779	0.607	2.69094e-17	C04 - CD8+ CTL : METRNL ADT-NKG2Dmid	SERTAD1
KLRC1.2	6.56784e-22	0.564473	0.215	0.085	2.96794e-17	C04 - CD8+ CTL : METRNL ADT-NKG2Dmid	KLRC1
HSPA5.1	8.17558e-22	0.377279	0.84	0.68	3.69446e-17	C04 - CD8+ CTL : METRNL ADT-NKG2Dmid	HSPA5
LDHA.1	8.17863e-22	0.413278	0.874	0.735	3.69584e-17	C04 - CD8+ CTL : METRNL ADT-NKG2Dmid	LDHA
GK.3	9.83951e-22	-0.655367	0.035	0.154	4.44638e-17	C04 - CD8+ CTL : METRNL ADT-NKG2Dmid	GK
TMEM173.1	1.30329e-21	-0.562601	0.148	0.306	5.88942e-17	C04 - CD8+ CTL : METRNL ADT-NKG2Dmid	TMEM173
CD74.3	1.45767e-21	-0.59796	0.664	0.713	6.58706e-17	C04 - CD8+ CTL : METRNL ADT-NKG2Dmid	CD74
RP11-291B21.2	2.19193e-21	0.371936	0.143	0.04	9.90512e-17	C04 - CD8+ CTL : METRNL ADT-NKG2Dmid	RP11-291B21.2
TIPARP.1	3.89231e-21	0.474045	0.56	0.366	1.7589e-16	C04 - CD8+ CTL : METRNL ADT-NKG2Dmid	TIPARP
CALM2.1	4.14856e-21	0.416551	0.892	0.774	1.87469e-16	C04 - CD8+ CTL : METRNL ADT-NKG2Dmid	CALM2
SRSF2.1	6.19671e-21	0.398611	0.915	0.821	2.80023e-16	C04 - CD8+ CTL : METRNL ADT-NKG2Dmid	SRSF2
DYNLL1	6.95574e-21	0.418111	0.907	0.801	3.14323e-16	C04 - CD8+ CTL : METRNL ADT-NKG2Dmid	DYNLL1
CTSA	7.3047e-21	0.503453	0.458	0.3	3.30092e-16	C04 - CD8+ CTL : METRNL ADT-NKG2Dmid	CTSA
RASGEF1B.1	1.00844e-20	0.439247	0.457	0.27	4.55703e-16	C04 - CD8+ CTL : METRNL ADT-NKG2Dmid	RASGEF1B
PPP2R5C.1	1.05081e-20	0.404112	0.824	0.679	4.74852e-16	C04 - CD8+ CTL : METRNL ADT-NKG2Dmid	PPP2R5C
SYNGR1	1.50884e-20	0.270208	0.137	0.039	6.8183e-16	C04 - CD8+ CTL : METRNL ADT-NKG2Dmid	SYNGR1
TSC22D3	1.94165e-20	0.435041	0.958	0.904	8.77413e-16	C04 - CD8+ CTL : METRNL ADT-NKG2Dmid	TSC22D3
SLC16A3	2.08577e-20	0.397703	0.311	0.153	9.42537e-16	C04 - CD8+ CTL : METRNL ADT-NKG2Dmid	SLC16A3
IER5L.2	6.07e-20	0.465297	0.537	0.347	2.74297e-15	C04 - CD8+ CTL : METRNL ADT-NKG2Dmid	IER5L
ARG2	7.76965e-20	0.438645	0.184	0.067	3.51103e-15	C04 - CD8+ CTL : METRNL ADT-NKG2Dmid	ARG2
SLC25A4	9.63501e-20	0.407777	0.245	0.109	4.35396e-15	C04 - CD8+ CTL : METRNL ADT-NKG2Dmid	SLC25A4
STOM	1.22358e-19	0.318454	0.427	0.251	5.52925e-15	C04 - CD8+ CTL : METRNL ADT-NKG2Dmid	STOM
LTB.2	2.01e-19	-0.74526	0.625	0.666	9.08298e-15	C04 - CD8+ CTL : METRNL ADT-NKG2Dmid	LTB
ZC3H12D.1	3.17009e-19	-0.538969	0.094	0.232	1.43253e-14	C04 - CD8+ CTL : METRNL ADT-NKG2Dmid	ZC3H12D
SYAP1	4.47204e-19	0.49476	0.529	0.357	2.02087e-14	C04 - CD8+ CTL : METRNL ADT-NKG2Dmid	SYAP1
DNPH1.3	6.8519e-19	-0.545762	0.149	0.287	3.0963e-14	C04 - CD8+ CTL : METRNL ADT-NKG2Dmid	DNPH1
CYCS.1	7.34025e-19	0.451555	0.804	0.67	3.31699e-14	C04 - CD8+ CTL : METRNL ADT-NKG2Dmid	CYCS
NR4A2.1	1.02731e-18	0.272315	0.878	0.726	4.64231e-14	C04 - CD8+ CTL : METRNL ADT-NKG2Dmid	NR4A2
CTH	1.08384e-18	0.291345	0.107	0.026	4.89778e-14	C04 - CD8+ CTL : METRNL ADT-NKG2Dmid	CTH
CEBPB.1	1.29886e-18	0.500823	0.545	0.374	5.86942e-14	C04 - CD8+ CTL : METRNL ADT-NKG2Dmid	CEBPB
TNFRSF25.2	1.55826e-18	-0.511949	0.14	0.291	7.04163e-14	C04 - CD8+ CTL : METRNL ADT-NKG2Dmid	TNFRSF25
HLA-DRA.3	2.10972e-18	-0.789141	0.303	0.428	9.53361e-14	C04 - CD8+ CTL : METRNL ADT-NKG2Dmid	HLA-DRA
NR4A3.1	2.53199e-18	0.412095	0.495	0.315	1.14418e-13	C04 - CD8+ CTL : METRNL ADT-NKG2Dmid	NR4A3
KPNA2	3.05392e-18	0.404742	0.524	0.345	1.38004e-13	C04 - CD8+ CTL : METRNL ADT-NKG2Dmid	KPNA2
CD69.1	3.41432e-18	0.527533	0.926	0.82	1.5429e-13	C04 - CD8+ CTL : METRNL ADT-NKG2Dmid	CD69
DUSP4.2	3.90699e-18	-0.750918	0.487	0.589	1.76553e-13	C04 - CD8+ CTL : METRNL ADT-NKG2Dmid	DUSP4
LINC02446	4.16838e-18	0.348922	0.1	0.024	1.88365e-13	C04 - CD8+ CTL : METRNL ADT-NKG2Dmid	LINC02446
PDCD4.1	4.34931e-18	0.345261	0.743	0.569	1.96541e-13	C04 - CD8+ CTL : METRNL ADT-NKG2Dmid	PDCD4
RNF139.1	5.27361e-18	0.440314	0.443	0.28	2.38309e-13	C04 - CD8+ CTL : METRNL ADT-NKG2Dmid	RNF139
H2AFX.1	5.3551e-18	0.30561	0.603	0.419	2.41992e-13	C04 - CD8+ CTL : METRNL ADT-NKG2Dmid	H2AFX
DDX5	6.71003e-18	0.302829	0.973	0.957	3.0322e-13	C04 - CD8+ CTL : METRNL ADT-NKG2Dmid	DDX5
ID2.3	7.36274e-18	0.323205	0.813	0.647	3.32715e-13	C04 - CD8+ CTL : METRNL ADT-NKG2Dmid	ID2
IFITM3	8.19204e-18	0.324983	0.235	0.107	3.7019e-13	C04 - CD8+ CTL : METRNL ADT-NKG2Dmid	IFITM3
GTF2B.1	9.61808e-18	0.395524	0.695	0.523	4.34632e-13	C04 - CD8+ CTL : METRNL ADT-NKG2Dmid	GTF2B
TNFRSF18.3	1.06121e-17	-0.930613	0.203	0.305	4.79548e-13	C04 - CD8+ CTL : METRNL ADT-NKG2Dmid	TNFRSF18
H2AFZ	1.63728e-17	0.371601	0.878	0.749	7.39872e-13	C04 - CD8+ CTL : METRNL ADT-NKG2Dmid	H2AFZ
HLA-DPB1.3	2.50964e-17	-0.381286	0.557	0.543	1.13408e-12	C04 - CD8+ CTL : METRNL ADT-NKG2Dmid	HLA-DPB1
AC133644.2.3	2.99897e-17	-0.446012	0.024	0.112	1.35521e-12	C04 - CD8+ CTL : METRNL ADT-NKG2Dmid	AC133644.2
RAB11FIP1.3	9.36768e-17	-0.58275	0.248	0.343	4.23316e-12	C04 - CD8+ CTL : METRNL ADT-NKG2Dmid	RAB11FIP1
GPR18	9.43503e-17	0.35763	0.182	0.072	4.26359e-12	C04 - CD8+ CTL : METRNL ADT-NKG2Dmid	GPR18
ARL4D	1.73306e-16	0.356806	0.17	0.066	7.83151e-12	C04 - CD8+ CTL : METRNL ADT-NKG2Dmid	ARL4D
CARD16.3	2.03091e-16	-0.567652	0.254	0.352	9.17747e-12	C04 - CD8+ CTL : METRNL ADT-NKG2Dmid	CARD16
HCG18	2.03357e-16	0.42006	0.392	0.238	9.18948e-12	C04 - CD8+ CTL : METRNL ADT-NKG2Dmid	HCG18
CFLAR.2	2.38256e-16	-0.51594	0.391	0.489	1.07666e-11	C04 - CD8+ CTL : METRNL ADT-NKG2Dmid	CFLAR
SERP1.1	3.2097e-16	0.335627	0.808	0.664	1.45043e-11	C04 - CD8+ CTL : METRNL ADT-NKG2Dmid	SERP1
CCR6.2	3.61731e-16	-0.456658	0.033	0.132	1.63463e-11	C04 - CD8+ CTL : METRNL ADT-NKG2Dmid	CCR6
CTSC.2	4.08728e-16	-0.575034	0.377	0.466	1.847e-11	C04 - CD8+ CTL : METRNL ADT-NKG2Dmid	CTSC
MKNK2	4.28992e-16	0.400992	0.548	0.382	1.93857e-11	C04 - CD8+ CTL : METRNL ADT-NKG2Dmid	MKNK2
NCF4.1	6.50311e-16	-0.294058	0.028	0.123	2.93869e-11	C04 - CD8+ CTL : METRNL ADT-NKG2Dmid	NCF4
HSPA8.2	8.033e-16	0.403926	0.967	0.924	3.63003e-11	C04 - CD8+ CTL : METRNL ADT-NKG2Dmid	HSPA8
AC092580.4	1.32402e-15	0.266351	0.184	0.08	5.98313e-11	C04 - CD8+ CTL : METRNL ADT-NKG2Dmid	AC092580.4
ALG13	1.41212e-15	0.471549	0.424	0.289	6.38123e-11	C04 - CD8+ CTL : METRNL ADT-NKG2Dmid	ALG13
ZEB2.3	1.52634e-15	0.268943	0.418	0.265	6.89736e-11	C04 - CD8+ CTL : METRNL ADT-NKG2Dmid	ZEB2
BAIAP2	2.11923e-15	0.31359	0.185	0.078	9.57658e-11	C04 - CD8+ CTL : METRNL ADT-NKG2Dmid	BAIAP2
ARPC1B.2	2.28433e-15	-0.389546	0.565	0.607	1.03227e-10	C04 - CD8+ CTL : METRNL ADT-NKG2Dmid	ARPC1B
INSIG1.1	2.66324e-15	0.41064	0.378	0.232	1.20349e-10	C04 - CD8+ CTL : METRNL ADT-NKG2Dmid	INSIG1
TYMP.3	2.83626e-15	-0.606797	0.333	0.426	1.28168e-10	C04 - CD8+ CTL : METRNL ADT-NKG2Dmid	TYMP
HLA-DQA1.3	2.99668e-15	-0.714109	0.187	0.283	1.35417e-10	C04 - CD8+ CTL : METRNL ADT-NKG2Dmid	HLA-DQA1
IFI16.1	3.50496e-15	-0.461148	0.392	0.496	1.58385e-10	C04 - CD8+ CTL : METRNL ADT-NKG2Dmid	IFI16
LMNA.3	4.08699e-15	0.329674	0.776	0.626	1.84687e-10	C04 - CD8+ CTL : METRNL ADT-NKG2Dmid	LMNA
BCAS2.1	5.13735e-15	0.430856	0.626	0.477	2.32152e-10	C04 - CD8+ CTL : METRNL ADT-NKG2Dmid	BCAS2
RBPJ.2	6.21717e-15	-0.551618	0.361	0.44	2.80948e-10	C04 - CD8+ CTL : METRNL ADT-NKG2Dmid	RBPJ
LSR	6.44631e-15	0.294399	0.184	0.078	2.91302e-10	C04 - CD8+ CTL : METRNL ADT-NKG2Dmid	LSR
RUNX3.2	7.27311e-15	0.375353	0.667	0.513	3.28665e-10	C04 - CD8+ CTL : METRNL ADT-NKG2Dmid	RUNX3
CD28	7.95323e-15	-0.415653	0.094	0.216	3.59399e-10	C04 - CD8+ CTL : METRNL ADT-NKG2Dmid	CD28
SKIL.1	8.6965e-15	0.403571	0.495	0.336	3.92986e-10	C04 - CD8+ CTL : METRNL ADT-NKG2Dmid	SKIL
APBA2.1	8.77043e-15	0.29105	0.19	0.083	3.96327e-10	C04 - CD8+ CTL : METRNL ADT-NKG2Dmid	APBA2
JUNB	9.64094e-15	0.363692	0.965	0.921	4.35665e-10	C04 - CD8+ CTL : METRNL ADT-NKG2Dmid	JUNB
HIC1	1.03829e-14	0.321404	0.146	0.055	4.69191e-10	C04 - CD8+ CTL : METRNL ADT-NKG2Dmid	HIC1
CTSB	1.07472e-14	-0.410333	0.127	0.254	4.85657e-10	C04 - CD8+ CTL : METRNL ADT-NKG2Dmid	CTSB
HLA-DPA1.3	1.21402e-14	-0.432566	0.516	0.541	5.48602e-10	C04 - CD8+ CTL : METRNL ADT-NKG2Dmid	HLA-DPA1
SLC9A3R1	1.33394e-14	0.286266	0.471	0.312	6.02794e-10	C04 - CD8+ CTL : METRNL ADT-NKG2Dmid	SLC9A3R1
ITPRIP	1.46738e-14	0.269632	0.223	0.107	6.63094e-10	C04 - CD8+ CTL : METRNL ADT-NKG2Dmid	ITPRIP
RNF125	1.76407e-14	0.337916	0.407	0.255	7.97165e-10	C04 - CD8+ CTL : METRNL ADT-NKG2Dmid	RNF125
DDX18	2.13966e-14	0.432316	0.529	0.381	9.66889e-10	C04 - CD8+ CTL : METRNL ADT-NKG2Dmid	DDX18
NASP.1	2.26529e-14	0.363788	0.706	0.571	1.02366e-09	C04 - CD8+ CTL : METRNL ADT-NKG2Dmid	NASP
TUBB2A.1	2.37305e-14	0.42097	0.414	0.266	1.07236e-09	C04 - CD8+ CTL : METRNL ADT-NKG2Dmid	TUBB2A
OASL.1	2.97488e-14	0.312627	0.405	0.255	1.34432e-09	C04 - CD8+ CTL : METRNL ADT-NKG2Dmid	OASL
RRAS2	3.01282e-14	0.272895	0.168	0.07	1.36146e-09	C04 - CD8+ CTL : METRNL ADT-NKG2Dmid	RRAS2
S100A4.3	3.16609e-14	-0.289012	0.937	0.864	1.43072e-09	C04 - CD8+ CTL : METRNL ADT-NKG2Dmid	S100A4
STK17A.1	3.49002e-14	0.336038	0.791	0.676	1.57711e-09	C04 - CD8+ CTL : METRNL ADT-NKG2Dmid	STK17A
ARL4A.1	3.56838e-14	0.406514	0.534	0.38	1.61251e-09	C04 - CD8+ CTL : METRNL ADT-NKG2Dmid	ARL4A
LIMS1.1	3.61507e-14	-0.453214	0.204	0.341	1.63361e-09	C04 - CD8+ CTL : METRNL ADT-NKG2Dmid	LIMS1
SLC25A33	3.80691e-14	0.325632	0.228	0.115	1.7203e-09	C04 - CD8+ CTL : METRNL ADT-NKG2Dmid	SLC25A33
SAP18.1	5.28676e-14	0.351439	0.852	0.748	2.38903e-09	C04 - CD8+ CTL : METRNL ADT-NKG2Dmid	SAP18
LRIF1	5.31765e-14	0.324921	0.283	0.154	2.40299e-09	C04 - CD8+ CTL : METRNL ADT-NKG2Dmid	LRIF1
PARP8	5.62184e-14	0.350167	0.462	0.307	2.54046e-09	C04 - CD8+ CTL : METRNL ADT-NKG2Dmid	PARP8
OAT.1	6.15721e-14	0.305023	0.41	0.26	2.78238e-09	C04 - CD8+ CTL : METRNL ADT-NKG2Dmid	OAT
ID1	6.38209e-14	0.478492	0.231	0.115	2.884e-09	C04 - CD8+ CTL : METRNL ADT-NKG2Dmid	ID1
VPS37B	8.22119e-14	0.378567	0.504	0.355	3.71507e-09	C04 - CD8+ CTL : METRNL ADT-NKG2Dmid	VPS37B
TRG-AS1.1	1.08959e-13	0.35443	0.224	0.111	4.92373e-09	C04 - CD8+ CTL : METRNL ADT-NKG2Dmid	TRG-AS1
COTL1.2	1.10606e-13	-0.447212	0.6	0.658	4.99816e-09	C04 - CD8+ CTL : METRNL ADT-NKG2Dmid	COTL1
RHOB.2	1.13216e-13	0.306845	0.367	0.226	5.1161e-09	C04 - CD8+ CTL : METRNL ADT-NKG2Dmid	RHOB
CHMP1B.1	1.18913e-13	0.455542	0.543	0.409	5.37356e-09	C04 - CD8+ CTL : METRNL ADT-NKG2Dmid	CHMP1B
MOB4	1.31575e-13	0.435714	0.43	0.327	5.94573e-09	C04 - CD8+ CTL : METRNL ADT-NKG2Dmid	MOB4
FTH1.3	1.60843e-13	0.34903	0.994	0.969	7.26834e-09	C04 - CD8+ CTL : METRNL ADT-NKG2Dmid	FTH1
EPSTI1.3	1.63074e-13	-0.466667	0.217	0.317	7.36916e-09	C04 - CD8+ CTL : METRNL ADT-NKG2Dmid	EPSTI1
TUBA1A.1	1.77331e-13	0.33594	0.799	0.671	8.01341e-09	C04 - CD8+ CTL : METRNL ADT-NKG2Dmid	TUBA1A
MORF4L2	2.15755e-13	0.387914	0.458	0.326	9.74977e-09	C04 - CD8+ CTL : METRNL ADT-NKG2Dmid	MORF4L2
GMFG	3.5514e-13	-0.333214	0.63	0.663	1.60484e-08	C04 - CD8+ CTL : METRNL ADT-NKG2Dmid	GMFG
HLA-DQB1.3	3.79422e-13	-0.531193	0.203	0.322	1.71457e-08	C04 - CD8+ CTL : METRNL ADT-NKG2Dmid	HLA-DQB1
LAT.1	4.39884e-13	-0.413492	0.347	0.447	1.98779e-08	C04 - CD8+ CTL : METRNL ADT-NKG2Dmid	LAT
mm10---Gm42418.2	4.52522e-13	-0.513008	0.903	0.936	2.0449e-08	C04 - CD8+ CTL : METRNL ADT-NKG2Dmid	mm10---Gm42418
PKM.3	4.75435e-13	-0.513158	0.349	0.437	2.14844e-08	C04 - CD8+ CTL : METRNL ADT-NKG2Dmid	PKM
PARK7.1	4.82208e-13	-0.369228	0.518	0.565	2.17905e-08	C04 - CD8+ CTL : METRNL ADT-NKG2Dmid	PARK7
SAMHD1	6.26317e-13	-0.436746	0.174	0.279	2.83026e-08	C04 - CD8+ CTL : METRNL ADT-NKG2Dmid	SAMHD1
CSRNP1.1	8.44359e-13	0.294915	0.642	0.49	3.81557e-08	C04 - CD8+ CTL : METRNL ADT-NKG2Dmid	CSRNP1
SOCS1	8.66224e-13	0.358634	0.708	0.57	3.91438e-08	C04 - CD8+ CTL : METRNL ADT-NKG2Dmid	SOCS1
HNRNPLL	9.21259e-13	-0.360805	0.074	0.179	4.16308e-08	C04 - CD8+ CTL : METRNL ADT-NKG2Dmid	HNRNPLL
ARIH1	1.03995e-12	0.356547	0.565	0.425	4.69943e-08	C04 - CD8+ CTL : METRNL ADT-NKG2Dmid	ARIH1
MZT2B	1.37043e-12	-0.272682	0.606	0.632	6.19286e-08	C04 - CD8+ CTL : METRNL ADT-NKG2Dmid	MZT2B
SDCBP.2	1.42223e-12	0.256898	0.765	0.622	6.42692e-08	C04 - CD8+ CTL : METRNL ADT-NKG2Dmid	SDCBP
RNF213.2	1.78476e-12	-0.450671	0.548	0.601	8.06516e-08	C04 - CD8+ CTL : METRNL ADT-NKG2Dmid	RNF213
IL6ST.1	1.9346e-12	-0.4343	0.14	0.252	8.74225e-08	C04 - CD8+ CTL : METRNL ADT-NKG2Dmid	IL6ST
CD5.1	1.9691e-12	-0.370528	0.111	0.22	8.89819e-08	C04 - CD8+ CTL : METRNL ADT-NKG2Dmid	CD5
HNRNPAB	2.07153e-12	0.306477	0.619	0.469	9.36103e-08	C04 - CD8+ CTL : METRNL ADT-NKG2Dmid	HNRNPAB
CD6.1	2.4533e-12	-0.439465	0.29	0.387	1.10862e-07	C04 - CD8+ CTL : METRNL ADT-NKG2Dmid	CD6
ARF4	2.50438e-12	0.351954	0.579	0.443	1.1317e-07	C04 - CD8+ CTL : METRNL ADT-NKG2Dmid	ARF4
PITPNC1	2.54317e-12	0.286423	0.334	0.204	1.14923e-07	C04 - CD8+ CTL : METRNL ADT-NKG2Dmid	PITPNC1
SPOCK2.1	2.60767e-12	-0.331456	0.531	0.551	1.17838e-07	C04 - CD8+ CTL : METRNL ADT-NKG2Dmid	SPOCK2
RARA	2.93906e-12	0.308114	0.283	0.165	1.32813e-07	C04 - CD8+ CTL : METRNL ADT-NKG2Dmid	RARA
SLC25A3	3.23697e-12	0.25989	0.812	0.683	1.46276e-07	C04 - CD8+ CTL : METRNL ADT-NKG2Dmid	SLC25A3
SPRY1	3.30404e-12	0.467712	0.168	0.076	1.49306e-07	C04 - CD8+ CTL : METRNL ADT-NKG2Dmid	SPRY1
FAM107B.3	3.55735e-12	-0.377862	0.631	0.62	1.60753e-07	C04 - CD8+ CTL : METRNL ADT-NKG2Dmid	FAM107B
RILPL2.3	3.63721e-12	-0.453479	0.254	0.388	1.64362e-07	C04 - CD8+ CTL : METRNL ADT-NKG2Dmid	RILPL2
TNFRSF9.3	3.8071e-12	-0.627509	0.1	0.192	1.72039e-07	C04 - CD8+ CTL : METRNL ADT-NKG2Dmid	TNFRSF9
ODC1.2	4.12605e-12	0.437846	0.648	0.521	1.86452e-07	C04 - CD8+ CTL : METRNL ADT-NKG2Dmid	ODC1
ISCA1	4.24775e-12	0.371168	0.402	0.283	1.91952e-07	C04 - CD8+ CTL : METRNL ADT-NKG2Dmid	ISCA1
HSPA2	4.3242e-12	0.289827	0.198	0.097	1.95406e-07	C04 - CD8+ CTL : METRNL ADT-NKG2Dmid	HSPA2
PBXIP1.1	4.81981e-12	-0.43104	0.3	0.393	2.17802e-07	C04 - CD8+ CTL : METRNL ADT-NKG2Dmid	PBXIP1
LGALS1.1	7.49321e-12	-0.601155	0.422	0.461	3.38611e-07	C04 - CD8+ CTL : METRNL ADT-NKG2Dmid	LGALS1
XBP1.1	7.6744e-12	0.320404	0.567	0.422	3.46799e-07	C04 - CD8+ CTL : METRNL ADT-NKG2Dmid	XBP1
ARID5B.1	8.83202e-12	-0.510389	0.504	0.56	3.9911e-07	C04 - CD8+ CTL : METRNL ADT-NKG2Dmid	ARID5B
TPST2.2	9.00832e-12	0.254679	0.331	0.205	4.07077e-07	C04 - CD8+ CTL : METRNL ADT-NKG2Dmid	TPST2
PITHD1	1.02834e-11	0.292166	0.501	0.358	4.64697e-07	C04 - CD8+ CTL : METRNL ADT-NKG2Dmid	PITHD1
ZBTB10.1	1.10965e-11	0.258268	0.25	0.139	5.01439e-07	C04 - CD8+ CTL : METRNL ADT-NKG2Dmid	ZBTB10
PNP.1	1.15883e-11	0.346022	0.458	0.322	5.23663e-07	C04 - CD8+ CTL : METRNL ADT-NKG2Dmid	PNP
GBP2.2	1.34356e-11	-0.399553	0.344	0.418	6.07142e-07	C04 - CD8+ CTL : METRNL ADT-NKG2Dmid	GBP2
PGK1	1.55854e-11	0.340785	0.706	0.587	7.0429e-07	C04 - CD8+ CTL : METRNL ADT-NKG2Dmid	PGK1
PTPRC.2	1.55958e-11	-0.261124	0.926	0.915	7.04758e-07	C04 - CD8+ CTL : METRNL ADT-NKG2Dmid	PTPRC
PRDX6	1.59107e-11	0.311698	0.515	0.377	7.18989e-07	C04 - CD8+ CTL : METRNL ADT-NKG2Dmid	PRDX6
MAP1LC3B	1.62952e-11	0.319477	0.761	0.64	7.36362e-07	C04 - CD8+ CTL : METRNL ADT-NKG2Dmid	MAP1LC3B
2006-09-01	1.91534e-11	-0.383707	0.419	0.495	8.65525e-07	C04 - CD8+ CTL : METRNL ADT-NKG2Dmid	2006-09-01
CREM.1	2.09796e-11	0.268603	0.845	0.731	9.48046e-07	C04 - CD8+ CTL : METRNL ADT-NKG2Dmid	CREM
ZBTB1	2.11577e-11	0.302784	0.447	0.309	9.56095e-07	C04 - CD8+ CTL : METRNL ADT-NKG2Dmid	ZBTB1
MIDN.1	2.47252e-11	0.343591	0.553	0.419	1.11731e-06	C04 - CD8+ CTL : METRNL ADT-NKG2Dmid	MIDN
CALM3.2	2.6733e-11	-0.313146	0.4	0.438	1.20804e-06	C04 - CD8+ CTL : METRNL ADT-NKG2Dmid	CALM3
IFITM2.1	2.89291e-11	0.320693	0.741	0.631	1.30728e-06	C04 - CD8+ CTL : METRNL ADT-NKG2Dmid	IFITM2
CALR	2.90975e-11	0.257255	0.827	0.711	1.31489e-06	C04 - CD8+ CTL : METRNL ADT-NKG2Dmid	CALR
NDUFV2.1	3.01441e-11	-0.341017	0.411	0.463	1.36218e-06	C04 - CD8+ CTL : METRNL ADT-NKG2Dmid	NDUFV2
MZT2A	4.05217e-11	-0.29211	0.416	0.469	1.83113e-06	C04 - CD8+ CTL : METRNL ADT-NKG2Dmid	MZT2A
ANKRD12	4.38565e-11	-0.384075	0.673	0.712	1.98183e-06	C04 - CD8+ CTL : METRNL ADT-NKG2Dmid	ANKRD12
NFKB1.1	4.87496e-11	0.385646	0.452	0.329	2.20294e-06	C04 - CD8+ CTL : METRNL ADT-NKG2Dmid	NFKB1
BTG2	5.01268e-11	0.250296	0.771	0.641	2.26518e-06	C04 - CD8+ CTL : METRNL ADT-NKG2Dmid	BTG2
GLCCI1.2	5.25083e-11	-0.378255	0.111	0.215	2.3728e-06	C04 - CD8+ CTL : METRNL ADT-NKG2Dmid	GLCCI1
FRMD4B.1	5.5393e-11	-0.427824	0.069	0.161	2.50315e-06	C04 - CD8+ CTL : METRNL ADT-NKG2Dmid	FRMD4B
PHACTR2.2	6.14597e-11	-0.401811	0.154	0.258	2.7773e-06	C04 - CD8+ CTL : METRNL ADT-NKG2Dmid	PHACTR2
TWISTNB	6.67912e-11	0.410444	0.232	0.145	3.01823e-06	C04 - CD8+ CTL : METRNL ADT-NKG2Dmid	TWISTNB
NAMPT.2	7.21312e-11	-0.478091	0.378	0.438	3.25954e-06	C04 - CD8+ CTL : METRNL ADT-NKG2Dmid	NAMPT
MAST4.1	7.60238e-11	-0.291991	0.038	0.115	3.43544e-06	C04 - CD8+ CTL : METRNL ADT-NKG2Dmid	MAST4
LIMD2.1	7.64667e-11	-0.378944	0.515	0.596	3.45545e-06	C04 - CD8+ CTL : METRNL ADT-NKG2Dmid	LIMD2
YWHAB.1	9.29412e-11	-0.335062	0.579	0.635	4.19992e-06	C04 - CD8+ CTL : METRNL ADT-NKG2Dmid	YWHAB
SIT1.1	9.53736e-11	-0.34291	0.122	0.23	4.30984e-06	C04 - CD8+ CTL : METRNL ADT-NKG2Dmid	SIT1
CTD-3252C9.4	1.02212e-10	0.405874	0.405	0.276	4.61886e-06	C04 - CD8+ CTL : METRNL ADT-NKG2Dmid	CTD-3252C9.4
CORO1A.1	1.02938e-10	-0.265876	0.801	0.793	4.65167e-06	C04 - CD8+ CTL : METRNL ADT-NKG2Dmid	CORO1A
DNAJB9.1	1.03127e-10	0.269281	0.52	0.381	4.66022e-06	C04 - CD8+ CTL : METRNL ADT-NKG2Dmid	DNAJB9
PPP1R14B.3	1.17739e-10	0.309788	0.425	0.293	5.3205e-06	C04 - CD8+ CTL : METRNL ADT-NKG2Dmid	PPP1R14B
UBE2D1	1.20282e-10	0.273054	0.283	0.169	5.43541e-06	C04 - CD8+ CTL : METRNL ADT-NKG2Dmid	UBE2D1
AP3M2.2	1.33884e-10	-0.376659	0.121	0.218	6.0501e-06	C04 - CD8+ CTL : METRNL ADT-NKG2Dmid	AP3M2
FABP5.3	1.40365e-10	0.284363	0.399	0.27	6.34297e-06	C04 - CD8+ CTL : METRNL ADT-NKG2Dmid	FABP5
PRPF38B	1.42861e-10	-0.388777	0.505	0.588	6.45574e-06	C04 - CD8+ CTL : METRNL ADT-NKG2Dmid	PRPF38B
NPM1.1	1.60939e-10	0.253031	0.926	0.865	7.27268e-06	C04 - CD8+ CTL : METRNL ADT-NKG2Dmid	NPM1
GIMAP7	1.75652e-10	-0.488347	0.231	0.332	7.93756e-06	C04 - CD8+ CTL : METRNL ADT-NKG2Dmid	GIMAP7
TANK.1	1.84373e-10	-0.439319	0.414	0.493	8.33164e-06	C04 - CD8+ CTL : METRNL ADT-NKG2Dmid	TANK
NFE2L2	1.89723e-10	0.265763	0.59	0.452	8.57337e-06	C04 - CD8+ CTL : METRNL ADT-NKG2Dmid	NFE2L2
ANP32B.1	2.03764e-10	-0.28121	0.512	0.543	9.2079e-06	C04 - CD8+ CTL : METRNL ADT-NKG2Dmid	ANP32B
MAGEH1.3	2.1191e-10	-0.440666	0.038	0.103	9.576e-06	C04 - CD8+ CTL : METRNL ADT-NKG2Dmid	MAGEH1
CD27.2	2.16912e-10	-0.318417	0.364	0.362	9.80204e-06	C04 - CD8+ CTL : METRNL ADT-NKG2Dmid	CD27
SCML4	2.46168e-10	0.255722	0.275	0.166	1.11241e-05	C04 - CD8+ CTL : METRNL ADT-NKG2Dmid	SCML4
NR3C1.1	2.55986e-10	-0.410928	0.402	0.444	1.15678e-05	C04 - CD8+ CTL : METRNL ADT-NKG2Dmid	NR3C1
PNISR.1	2.64359e-10	-0.359682	0.592	0.668	1.19461e-05	C04 - CD8+ CTL : METRNL ADT-NKG2Dmid	PNISR
PAG1	3.65222e-10	-0.365886	0.179	0.294	1.6504e-05	C04 - CD8+ CTL : METRNL ADT-NKG2Dmid	PAG1
DUSP16.1	3.76987e-10	-0.355867	0.11	0.208	1.70357e-05	C04 - CD8+ CTL : METRNL ADT-NKG2Dmid	DUSP16
CACYBP.2	3.90388e-10	-0.461768	0.429	0.502	1.76413e-05	C04 - CD8+ CTL : METRNL ADT-NKG2Dmid	CACYBP
SPTSSA	4.17121e-10	0.270801	0.198	0.108	1.88493e-05	C04 - CD8+ CTL : METRNL ADT-NKG2Dmid	SPTSSA
PGAM1.1	4.44846e-10	-0.303795	0.359	0.4	2.01021e-05	C04 - CD8+ CTL : METRNL ADT-NKG2Dmid	PGAM1
GLA	4.53476e-10	0.390097	0.218	0.129	2.04921e-05	C04 - CD8+ CTL : METRNL ADT-NKG2Dmid	GLA
UBB.1	5.11182e-10	0.292111	0.961	0.938	2.30998e-05	C04 - CD8+ CTL : METRNL ADT-NKG2Dmid	UBB
TMPO.1	5.67002e-10	-0.356863	0.122	0.211	2.56222e-05	C04 - CD8+ CTL : METRNL ADT-NKG2Dmid	TMPO
ITK	6.26747e-10	-0.377565	0.228	0.338	2.83221e-05	C04 - CD8+ CTL : METRNL ADT-NKG2Dmid	ITK
GNL3	6.50674e-10	0.314607	0.355	0.243	2.94033e-05	C04 - CD8+ CTL : METRNL ADT-NKG2Dmid	GNL3
HN1.1	8.21186e-10	0.322743	0.413	0.287	3.71086e-05	C04 - CD8+ CTL : METRNL ADT-NKG2Dmid	HN1
RASGRP1.1	9.75778e-10	-0.369152	0.203	0.305	4.40944e-05	C04 - CD8+ CTL : METRNL ADT-NKG2Dmid	RASGRP1
PSMB3.1	9.83294e-10	-0.264255	0.383	0.426	4.44341e-05	C04 - CD8+ CTL : METRNL ADT-NKG2Dmid	PSMB3
EED.1	1.12954e-09	-0.285155	0.08	0.17	5.10426e-05	C04 - CD8+ CTL : METRNL ADT-NKG2Dmid	EED
TNFSF10.1	1.27765e-09	-0.427605	0.14	0.236	5.77357e-05	C04 - CD8+ CTL : METRNL ADT-NKG2Dmid	TNFSF10
LUC7L3.1	1.49484e-09	-0.369322	0.408	0.484	6.75505e-05	C04 - CD8+ CTL : METRNL ADT-NKG2Dmid	LUC7L3
SELL.1	1.7308e-09	-0.415885	0.137	0.225	7.82131e-05	C04 - CD8+ CTL : METRNL ADT-NKG2Dmid	SELL
CKS2	1.78897e-09	0.282994	0.584	0.453	8.08416e-05	C04 - CD8+ CTL : METRNL ADT-NKG2Dmid	CKS2
MFHAS1.1	1.80472e-09	-0.263984	0.046	0.119	8.15537e-05	C04 - CD8+ CTL : METRNL ADT-NKG2Dmid	MFHAS1
RAD21	1.94516e-09	-0.296011	0.283	0.333	8.78997e-05	C04 - CD8+ CTL : METRNL ADT-NKG2Dmid	RAD21
RNASET2.3	2.02987e-09	-0.337274	0.281	0.384	9.17278e-05	C04 - CD8+ CTL : METRNL ADT-NKG2Dmid	RNASET2
DHX36	2.06033e-09	0.288223	0.56	0.438	9.31044e-05	C04 - CD8+ CTL : METRNL ADT-NKG2Dmid	DHX36
NAB1.1	2.6442e-09	-0.281501	0.057	0.134	0.000119489	C04 - CD8+ CTL : METRNL ADT-NKG2Dmid	NAB1
STAM.2	2.7303e-09	-0.332785	0.085	0.162	0.000123379	C04 - CD8+ CTL : METRNL ADT-NKG2Dmid	STAM
PDCD1.1	2.79502e-09	-0.327191	0.055	0.132	0.000126304	C04 - CD8+ CTL : METRNL ADT-NKG2Dmid	PDCD1
ZNF292.3	3.20019e-09	-0.399131	0.279	0.354	0.000144614	C04 - CD8+ CTL : METRNL ADT-NKG2Dmid	ZNF292
GPCPD1	3.78875e-09	0.300956	0.286	0.193	0.00017121	C04 - CD8+ CTL : METRNL ADT-NKG2Dmid	GPCPD1
PSIP1	4.35953e-09	-0.337653	0.206	0.307	0.000197003	C04 - CD8+ CTL : METRNL ADT-NKG2Dmid	PSIP1
HMGB2.2	4.98577e-09	-0.325027	0.543	0.52	0.000225302	C04 - CD8+ CTL : METRNL ADT-NKG2Dmid	HMGB2
AKIRIN1	5.88278e-09	0.255546	0.48	0.356	0.000265837	C04 - CD8+ CTL : METRNL ADT-NKG2Dmid	AKIRIN1
NXT1.1	6.5221e-09	0.272858	0.327	0.22	0.000294727	C04 - CD8+ CTL : METRNL ADT-NKG2Dmid	NXT1
LY6E.1	6.69385e-09	-0.345567	0.551	0.576	0.000302488	C04 - CD8+ CTL : METRNL ADT-NKG2Dmid	LY6E
RAC1.1	6.75476e-09	-0.30859	0.392	0.463	0.000305241	C04 - CD8+ CTL : METRNL ADT-NKG2Dmid	RAC1
HSPE1.2	6.81194e-09	0.431795	0.827	0.759	0.000307825	C04 - CD8+ CTL : METRNL ADT-NKG2Dmid	HSPE1
MTRNR2L8	7.96951e-09	-0.434171	0.353	0.424	0.000360134	C04 - CD8+ CTL : METRNL ADT-NKG2Dmid	MTRNR2L8
VMP1	8.93037e-09	-0.394374	0.523	0.606	0.000403554	C04 - CD8+ CTL : METRNL ADT-NKG2Dmid	VMP1
TRAF3IP3.1	1.04473e-08	-0.361376	0.273	0.363	0.000472102	C04 - CD8+ CTL : METRNL ADT-NKG2Dmid	TRAF3IP3
CCL4.3	1.19662e-08	0.287238	0.512	0.391	0.000540741	C04 - CD8+ CTL : METRNL ADT-NKG2Dmid	CCL4
NDUFC2.1	1.23901e-08	-0.286585	0.367	0.419	0.000559895	C04 - CD8+ CTL : METRNL ADT-NKG2Dmid	NDUFC2
MIEN1	1.28613e-08	-0.251512	0.116	0.21	0.000581187	C04 - CD8+ CTL : METRNL ADT-NKG2Dmid	MIEN1
PHPT1.1	1.37803e-08	-0.314689	0.275	0.354	0.000622718	C04 - CD8+ CTL : METRNL ADT-NKG2Dmid	PHPT1
IMPDH2	1.38354e-08	0.250617	0.209	0.129	0.000625207	C04 - CD8+ CTL : METRNL ADT-NKG2Dmid	IMPDH2
SLC1A5.1	1.43979e-08	0.277808	0.312	0.209	0.000650626	C04 - CD8+ CTL : METRNL ADT-NKG2Dmid	SLC1A5
EIF1AX	1.54329e-08	0.279414	0.626	0.517	0.000697397	C04 - CD8+ CTL : METRNL ADT-NKG2Dmid	EIF1AX
TOB1	1.7334e-08	0.407056	0.546	0.457	0.000783308	C04 - CD8+ CTL : METRNL ADT-NKG2Dmid	TOB1
CCND2.2	1.9799e-08	-0.333185	0.303	0.361	0.000894696	C04 - CD8+ CTL : METRNL ADT-NKG2Dmid	CCND2
PSMB8.1	2.10364e-08	-0.263181	0.416	0.455	0.000950612	C04 - CD8+ CTL : METRNL ADT-NKG2Dmid	PSMB8
HLA-DMA.3	2.26586e-08	-0.340036	0.157	0.243	0.00102392	C04 - CD8+ CTL : METRNL ADT-NKG2Dmid	HLA-DMA
GBP5.2	2.53918e-08	-0.395153	0.245	0.327	0.00114743	C04 - CD8+ CTL : METRNL ADT-NKG2Dmid	GBP5
SQSTM1.2	2.74132e-08	0.292889	0.694	0.594	0.00123877	C04 - CD8+ CTL : METRNL ADT-NKG2Dmid	SQSTM1
RSRC2	2.94728e-08	-0.305097	0.518	0.58	0.00133185	C04 - CD8+ CTL : METRNL ADT-NKG2Dmid	RSRC2
PMEPA1.2	3.20293e-08	0.2504	0.292	0.19	0.00144737	C04 - CD8+ CTL : METRNL ADT-NKG2Dmid	PMEPA1
PMAIP1.3	3.2946e-08	-0.331378	0.488	0.455	0.0014888	C04 - CD8+ CTL : METRNL ADT-NKG2Dmid	PMAIP1
BACH1.2	3.43917e-08	-0.319804	0.148	0.206	0.00155413	C04 - CD8+ CTL : METRNL ADT-NKG2Dmid	BACH1
PRPF4B.1	3.69555e-08	-0.363126	0.232	0.33	0.00166998	C04 - CD8+ CTL : METRNL ADT-NKG2Dmid	PRPF4B
TNIK	4.11934e-08	-0.279088	0.089	0.167	0.00186149	C04 - CD8+ CTL : METRNL ADT-NKG2Dmid	TNIK
PPM1G.2	4.84888e-08	-0.29763	0.235	0.312	0.00219116	C04 - CD8+ CTL : METRNL ADT-NKG2Dmid	PPM1G
MRPS6.2	4.95144e-08	0.366344	0.484	0.386	0.00223751	C04 - CD8+ CTL : METRNL ADT-NKG2Dmid	MRPS6
UCP2.3	5.29071e-08	-0.327946	0.314	0.373	0.00239082	C04 - CD8+ CTL : METRNL ADT-NKG2Dmid	UCP2
CEBPD	5.79791e-08	0.354438	0.196	0.115	0.00262002	C04 - CD8+ CTL : METRNL ADT-NKG2Dmid	CEBPD
CCDC167.1	5.91514e-08	-0.264429	0.176	0.228	0.00267299	C04 - CD8+ CTL : METRNL ADT-NKG2Dmid	CCDC167
FOXP1.1	6.20856e-08	-0.333077	0.35	0.389	0.00280559	C04 - CD8+ CTL : METRNL ADT-NKG2Dmid	FOXP1
WHSC1L1.2	6.68865e-08	-0.320912	0.25	0.28	0.00302253	C04 - CD8+ CTL : METRNL ADT-NKG2Dmid	WHSC1L1
CNIH1	7.19002e-08	-0.291789	0.127	0.21	0.0032491	C04 - CD8+ CTL : METRNL ADT-NKG2Dmid	CNIH1
LYST.3	7.27754e-08	-0.334918	0.275	0.323	0.00328865	C04 - CD8+ CTL : METRNL ADT-NKG2Dmid	LYST
GOLGA8A.1	8.09639e-08	-0.323817	0.108	0.169	0.00365868	C04 - CD8+ CTL : METRNL ADT-NKG2Dmid	GOLGA8A
HMGN2.1	8.93548e-08	-0.289465	0.529	0.532	0.00403785	C04 - CD8+ CTL : METRNL ADT-NKG2Dmid	HMGN2
KIF20B	1.04025e-07	-0.261823	0.061	0.133	0.0047008	C04 - CD8+ CTL : METRNL ADT-NKG2Dmid	KIF20B
CD82	1.13503e-07	-0.329263	0.195	0.269	0.00512909	C04 - CD8+ CTL : METRNL ADT-NKG2Dmid	CD82
DNTTIP2.1	1.21059e-07	0.267063	0.466	0.363	0.00547055	C04 - CD8+ CTL : METRNL ADT-NKG2Dmid	DNTTIP2
SESN3.1	1.25624e-07	-0.292936	0.071	0.134	0.00567681	C04 - CD8+ CTL : METRNL ADT-NKG2Dmid	SESN3
DNAJA1.2	1.29057e-07	0.25343	0.943	0.895	0.00583197	C04 - CD8+ CTL : METRNL ADT-NKG2Dmid	DNAJA1
SEC11C.1	1.34446e-07	-0.268385	0.284	0.333	0.00607546	C04 - CD8+ CTL : METRNL ADT-NKG2Dmid	SEC11C
ZBTB38.2	1.51149e-07	-0.320537	0.14	0.228	0.00683026	C04 - CD8+ CTL : METRNL ADT-NKG2Dmid	ZBTB38
PTTG1.2	1.53798e-07	-0.318892	0.171	0.254	0.00695	C04 - CD8+ CTL : METRNL ADT-NKG2Dmid	PTTG1
ATP5MC2.2	1.75012e-07	-0.321662	0.306	0.355	0.0079086	C04 - CD8+ CTL : METRNL ADT-NKG2Dmid	ATP5MC2
VAMP2	1.82815e-07	-0.306695	0.466	0.531	0.00826123	C04 - CD8+ CTL : METRNL ADT-NKG2Dmid	VAMP2
NMB.3	2.07904e-07	-0.608247	0.064	0.114	0.00939499	C04 - CD8+ CTL : METRNL ADT-NKG2Dmid	NMB
MTRNR2L12.1	2.25458e-07	-0.413422	0.793	0.815	0.0101882	C04 - CD8+ CTL : METRNL ADT-NKG2Dmid	MTRNR2L12
TLK1.1	2.34131e-07	-0.298828	0.163	0.246	0.0105801	C04 - CD8+ CTL : METRNL ADT-NKG2Dmid	TLK1
CD247.1	2.37273e-07	-0.287306	0.471	0.506	0.0107221	C04 - CD8+ CTL : METRNL ADT-NKG2Dmid	CD247
RHBDD2	2.40855e-07	-0.287485	0.135	0.218	0.010884	C04 - CD8+ CTL : METRNL ADT-NKG2Dmid	RHBDD2
ATF3.2	2.947e-07	0.385974	0.457	0.351	0.0133172	C04 - CD8+ CTL : METRNL ADT-NKG2Dmid	ATF3
FOXO1	3.34817e-07	-0.280435	0.146	0.215	0.01513	C04 - CD8+ CTL : METRNL ADT-NKG2Dmid	FOXO1
DDX17	3.35873e-07	-0.302841	0.575	0.599	0.0151777	C04 - CD8+ CTL : METRNL ADT-NKG2Dmid	DDX17
STAT1.1	3.38396e-07	-0.367125	0.281	0.373	0.0152918	C04 - CD8+ CTL : METRNL ADT-NKG2Dmid	STAT1
SAMSN1.1	3.45063e-07	-0.277003	0.65	0.642	0.015593	C04 - CD8+ CTL : METRNL ADT-NKG2Dmid	SAMSN1
CITED2.1	3.70349e-07	0.273998	0.512	0.402	0.0167357	C04 - CD8+ CTL : METRNL ADT-NKG2Dmid	CITED2
TRPS1	3.76654e-07	-0.331595	0.132	0.208	0.0170206	C04 - CD8+ CTL : METRNL ADT-NKG2Dmid	TRPS1
FAM53C.1	3.82597e-07	0.267462	0.385	0.287	0.0172892	C04 - CD8+ CTL : METRNL ADT-NKG2Dmid	FAM53C
EGR1.1	3.90795e-07	0.306048	0.396	0.29	0.0176596	C04 - CD8+ CTL : METRNL ADT-NKG2Dmid	EGR1
TSPYL2.1	4.3106e-07	0.310355	0.527	0.424	0.0194792	C04 - CD8+ CTL : METRNL ADT-NKG2Dmid	TSPYL2
SPTY2D1	4.31123e-07	0.27487	0.392	0.289	0.019482	C04 - CD8+ CTL : METRNL ADT-NKG2Dmid	SPTY2D1
BIRC3.1	4.48885e-07	-0.338367	0.619	0.644	0.0202847	C04 - CD8+ CTL : METRNL ADT-NKG2Dmid	BIRC3
ATRX.2	4.50971e-07	-0.3047	0.444	0.498	0.0203789	C04 - CD8+ CTL : METRNL ADT-NKG2Dmid	ATRX
FKBP11.1	4.53228e-07	0.300476	0.281	0.192	0.0204809	C04 - CD8+ CTL : METRNL ADT-NKG2Dmid	FKBP11
SYTL3	4.72602e-07	0.334756	0.414	0.319	0.0213564	C04 - CD8+ CTL : METRNL ADT-NKG2Dmid	SYTL3
CDKN1C	4.74546e-07	0.27329	0.177	0.104	0.0214442	C04 - CD8+ CTL : METRNL ADT-NKG2Dmid	CDKN1C
AL121944.1.1	4.95631e-07	0.261205	0.151	0.083	0.0223971	C04 - CD8+ CTL : METRNL ADT-NKG2Dmid	AL121944.1
MIAT.3	5.51517e-07	-0.279271	0.192	0.21	0.0249225	C04 - CD8+ CTL : METRNL ADT-NKG2Dmid	MIAT
RTKN2.3	5.63068e-07	-0.390402	0.058	0.111	0.0254445	C04 - CD8+ CTL : METRNL ADT-NKG2Dmid	RTKN2
KLF9	6.89447e-07	-0.324489	0.127	0.199	0.0311554	C04 - CD8+ CTL : METRNL ADT-NKG2Dmid	KLF9
FAS	7.328e-07	-0.297606	0.149	0.223	0.0331145	C04 - CD8+ CTL : METRNL ADT-NKG2Dmid	FAS
BST2.2	8.77845e-07	-0.274159	0.436	0.46	0.0396689	C04 - CD8+ CTL : METRNL ADT-NKG2Dmid	BST2
TTN.3	9.04039e-07	-0.445777	0.055	0.111	0.0408526	C04 - CD8+ CTL : METRNL ADT-NKG2Dmid	TTN
MIR155HG	9.23468e-07	-0.322461	0.066	0.133	0.0417306	C04 - CD8+ CTL : METRNL ADT-NKG2Dmid	MIR155HG
MSI2.2	9.74443e-07	-0.324491	0.187	0.255	0.0440341	C04 - CD8+ CTL : METRNL ADT-NKG2Dmid	MSI2
NAF1.1	1.02428e-06	0.289728	0.243	0.161	0.0462862	C04 - CD8+ CTL : METRNL ADT-NKG2Dmid	NAF1
PYHIN1.2	1.05082e-06	-0.349411	0.17	0.25	0.0474855	C04 - CD8+ CTL : METRNL ADT-NKG2Dmid	PYHIN1
PELI1.1	1.13013e-06	-0.291972	0.118	0.192	0.0510696	C04 - CD8+ CTL : METRNL ADT-NKG2Dmid	PELI1
JMJD6.1	1.21606e-06	0.271403	0.383	0.295	0.0549526	C04 - CD8+ CTL : METRNL ADT-NKG2Dmid	JMJD6
PTGER4.2	1.46954e-06	0.277008	0.524	0.423	0.0664072	C04 - CD8+ CTL : METRNL ADT-NKG2Dmid	PTGER4
TUBB.3	1.53623e-06	-0.38939	0.281	0.309	0.0694208	C04 - CD8+ CTL : METRNL ADT-NKG2Dmid	TUBB
MRPL51.1	1.58494e-06	-0.261649	0.224	0.291	0.0716221	C04 - CD8+ CTL : METRNL ADT-NKG2Dmid	MRPL51
NCK2	1.58686e-06	-0.279789	0.226	0.316	0.0717086	C04 - CD8+ CTL : METRNL ADT-NKG2Dmid	NCK2
NKTR.1	1.87637e-06	-0.328203	0.454	0.496	0.0847912	C04 - CD8+ CTL : METRNL ADT-NKG2Dmid	NKTR
SNX9.2	1.93648e-06	-0.313821	0.16	0.238	0.0875074	C04 - CD8+ CTL : METRNL ADT-NKG2Dmid	SNX9
GOLGA8B.2	1.99294e-06	-0.320789	0.122	0.184	0.0900592	C04 - CD8+ CTL : METRNL ADT-NKG2Dmid	GOLGA8B
IFI6.1	2.55827e-06	-0.451629	0.364	0.388	0.115606	C04 - CD8+ CTL : METRNL ADT-NKG2Dmid	IFI6
STAT4	2.8e-06	0.253246	0.447	0.352	0.126529	C04 - CD8+ CTL : METRNL ADT-NKG2Dmid	STAT4
MT-ATP8	2.82146e-06	-0.263491	0.333	0.364	0.127499	C04 - CD8+ CTL : METRNL ADT-NKG2Dmid	MT-ATP8
SF1	2.84004e-06	-0.263032	0.601	0.645	0.128338	C04 - CD8+ CTL : METRNL ADT-NKG2Dmid	SF1
SAMD9L.1	3.57422e-06	-0.315869	0.155	0.225	0.161515	C04 - CD8+ CTL : METRNL ADT-NKG2Dmid	SAMD9L
TNFAIP8	3.91673e-06	-0.252293	0.381	0.423	0.176993	C04 - CD8+ CTL : METRNL ADT-NKG2Dmid	TNFAIP8
HSPD1.2	3.94479e-06	0.379424	0.735	0.667	0.178261	C04 - CD8+ CTL : METRNL ADT-NKG2Dmid	HSPD1
HSPH1.2	4.00307e-06	0.400655	0.741	0.686	0.180895	C04 - CD8+ CTL : METRNL ADT-NKG2Dmid	HSPH1
AAK1	4.0064e-06	-0.263219	0.403	0.437	0.181045	C04 - CD8+ CTL : METRNL ADT-NKG2Dmid	AAK1
GOLGA4	4.08499e-06	-0.278743	0.385	0.41	0.184597	C04 - CD8+ CTL : METRNL ADT-NKG2Dmid	GOLGA4
MAP1LC3A	4.29442e-06	-0.250261	0.094	0.155	0.194061	C04 - CD8+ CTL : METRNL ADT-NKG2Dmid	MAP1LC3A
CREBRF	4.32633e-06	-0.310946	0.276	0.357	0.195502	C04 - CD8+ CTL : METRNL ADT-NKG2Dmid	CREBRF
ID3.3	4.84017e-06	0.481666	0.32	0.239	0.218722	C04 - CD8+ CTL : METRNL ADT-NKG2Dmid	ID3
GSPT1	5.36298e-06	0.292934	0.477	0.409	0.242348	C04 - CD8+ CTL : METRNL ADT-NKG2Dmid	GSPT1
SH3KBP1	5.37056e-06	-0.271608	0.312	0.385	0.24269	C04 - CD8+ CTL : METRNL ADT-NKG2Dmid	SH3KBP1
SYNE2.1	5.72856e-06	-0.334803	0.52	0.556	0.258868	C04 - CD8+ CTL : METRNL ADT-NKG2Dmid	SYNE2
PLCG2.2	5.97626e-06	-0.289974	0.137	0.141	0.270061	C04 - CD8+ CTL : METRNL ADT-NKG2Dmid	PLCG2
ADD3	6.05566e-06	-0.281561	0.195	0.257	0.273649	C04 - CD8+ CTL : METRNL ADT-NKG2Dmid	ADD3
SNX5	6.34533e-06	-0.250123	0.168	0.244	0.286739	C04 - CD8+ CTL : METRNL ADT-NKG2Dmid	SNX5
NFAT5	7.1845e-06	-0.318376	0.196	0.268	0.32466	C04 - CD8+ CTL : METRNL ADT-NKG2Dmid	NFAT5
ASH1L	7.28363e-06	-0.297942	0.286	0.36	0.32914	C04 - CD8+ CTL : METRNL ADT-NKG2Dmid	ASH1L
MYCBP2	8.86172e-06	-0.252011	0.389	0.429	0.400452	C04 - CD8+ CTL : METRNL ADT-NKG2Dmid	MYCBP2
ATP5MC3.1	9.01343e-06	-0.250581	0.19	0.228	0.407308	C04 - CD8+ CTL : METRNL ADT-NKG2Dmid	ATP5MC3
DAZAP2.1	1.05257e-05	-0.281189	0.496	0.554	0.475647	C04 - CD8+ CTL : METRNL ADT-NKG2Dmid	DAZAP2
FYB1.2	1.09844e-05	-0.378112	0.24	0.313	0.496374	C04 - CD8+ CTL : METRNL ADT-NKG2Dmid	FYB1
CHD3	1.2333e-05	-0.254461	0.149	0.212	0.557316	C04 - CD8+ CTL : METRNL ADT-NKG2Dmid	CHD3
CXCR6.1	1.24421e-05	-0.328786	0.089	0.149	0.562246	C04 - CD8+ CTL : METRNL ADT-NKG2Dmid	CXCR6
XIST.1	1.32997e-05	-0.319121	0.708	0.744	0.601002	C04 - CD8+ CTL : METRNL ADT-NKG2Dmid	XIST
SMC4.1	1.55839e-05	-0.278713	0.193	0.249	0.704221	C04 - CD8+ CTL : METRNL ADT-NKG2Dmid	SMC4
APOE	1.68577e-05	-0.262675	0.11	0.173	0.761785	C04 - CD8+ CTL : METRNL ADT-NKG2Dmid	APOE
CD84.1	1.85031e-05	-0.305973	0.126	0.193	0.836138	C04 - CD8+ CTL : METRNL ADT-NKG2Dmid	CD84
[truncated: 14,752 more rows]

## Sheet: All_TIL_ADT_markers
	p_val	avg_log2FC	pct.1	pct.2	p_val_adj	cluster	gene
[truncated: 500 more rows]

[truncated: 4 more sheets: CD4_TIL_RNA_markers, CD4_TIL_ADT_markers, CD8_TIL_RNA_markers, CD8_TIL_ADT_markers]
