# Supplementary material for: Proteotranscriptomic Dissection of Breast Cancer T Cell States Identifies CD103+ Tfh-derived Cytotoxic Cells Linked to Immunotherapy Response
Source: Research Square preprint supplement (doi:10.21203/rs.3.rs-8394722/v1), 2026-01-07
Supplement: Supplementary file 6 [file d870fd1d1a7d7b77b14511b9.xlsx]

## Sheet: Gene_signatures
IGFL2_Tfh	CD103_Tfh
SERPINE2	KRT86
GEM	NFIL3
IGFL2	BHLHE40
GNG4	IL21
G0S2	CTSL
NMB	CD6
CHN1	GADD45G
LMO4	NFIL3
PGM2L1	RNF19A
CXCL13	CXCL13

## Sheet: PD1_patient_cohort_info
Patient_classification	timepoint	Cell_type	n
NE	Baseline	CD8_Ex	19
NE	Baseline	Tfh_LAG3	12
NE	Baseline	Tfh_IGFL2	16
NE	During	CD8_Ex	16
NE	During	Tfh_LAG3	10
NE	During	Tfh_IGFL2	17
E	Baseline	CD8_Ex	9
E	Baseline	Tfh_LAG3	8
E	Baseline	Tfh_IGFL2	9
E	During	CD8_Ex	9
E	During	Tfh_LAG3	9
E	During	Tfh_IGFL2	9
